# Supplementary material for: Fe-rich X-ray amorphous material records past climate and persistence of water on Mars
Source: Commun Earth Environ. 2024 Jul 7;5(1):364. doi: 10.1038/s43247-024-01495-4 (PMC11227439; doi:10.1038/s43247-024-01495-4)
Supplement: Supplementary file 4 — Data Set 1 [file 43247_2024_1495_MOESM4_ESM.xlsx]

## Sheet: Parent Material
	Base XRD Patterns (Co Kα)
	Klamath Mountains										Tablelands		Pickhandle Gulch
	Eunice Bluff		Deadfall Lake		Swift Creek Late		Swift Creek Middle		String Bean Creek
	2θ	pattern	2θ	pattern	2θ	pattern	2θ	pattern	2θ	pattern	2θ	pattern	2θ	pattern
	2.00036	20954	2.00036	12735	2.00036	17602	2.00036	31311	2.00036	16369	2.00036	16201	2.00036	16787
	2.01707	20047	2.01707	11835	2.01707	16077	2.01707	29004	2.01707	16265	2.01707	15292	2.01707	15836
	2.03378	18456	2.03378	10635	2.03378	16301	2.03378	26629	2.03378	15768	2.03378	14406	2.03378	14895
	2.05049	16923	2.05049	10923	2.05049	16158	2.05049	24896	2.05049	15276	2.05049	14193	2.05049	14156
	2.0672	15823	2.0672	10990	2.0672	15067	2.0672	22884	2.0672	14408	2.0672	13723	2.0672	13600
	2.08391	14836	2.08391	10572	2.08391	13922	2.08391	21211	2.08391	13666	2.08391	13307	2.08391	13279
	2.10062	14448	2.10062	10047	2.10062	13023	2.10062	19899	2.10062	13273	2.10062	12579	2.10062	12878
	2.11733	13564	2.11733	9490	2.11733	12202	2.11733	18573	2.11733	12843	2.11733	12146	2.11733	12320
	2.13405	12666	2.13405	8652	2.13405	11705	2.13405	17216	2.13405	12464	2.13405	11676	2.13405	11501
	2.15076	11791	2.15076	8357	2.15076	11217	2.15076	15890	2.15076	12021	2.15076	11232	2.15076	11033
	2.16747	10958	2.16747	8202	2.16747	10462	2.16747	15198	2.16747	11624	2.16747	10658	2.16747	10857
	2.18418	11058	2.18418	7934	2.18418	9777	2.18418	14367	2.18418	11338	2.18418	10663	2.18418	10420
	2.20089	10744	2.20089	7342	2.20089	9000	2.20089	13429	2.20089	11267	2.20089	10137	2.20089	10241
	2.2176	10336	2.2176	7101	2.2176	9061	2.2176	12760	2.2176	11397	2.2176	9777	2.2176	9562
	2.23431	9680	2.23431	6937	2.23431	9025	2.23431	11838	2.23431	10930	2.23431	9471	2.23431	9435
	2.25102	9198	2.25102	7005	2.25102	8470	2.25102	11296	2.25102	10544	2.25102	9490	2.25102	9137
	2.26774	8709	2.26774	6936	2.26774	8379	2.26774	10877	2.26774	10207	2.26774	9197	2.26774	8948
	2.28445	8671	2.28445	6659	2.28445	7819	2.28445	10117	2.28445	10099	2.28445	9091	2.28445	8856
	2.30116	8200	2.30116	6419	2.30116	7404	2.30116	9675	2.30116	9810	2.30116	8676	2.30116	8449
	2.31787	7863	2.31787	6013	2.31787	7048	2.31787	9182	2.31787	9804	2.31787	8464	2.31787	8164
	2.33458	7493	2.33458	5965	2.33458	7034	2.33458	8854	2.33458	9688	2.33458	8301	2.33458	7918
	2.35129	7191	2.35129	5831	2.35129	6765	2.35129	8574	2.35129	9344	2.35129	8150	2.35129	7850
	2.368	7055	2.368	5660	2.368	6629	2.368	8159	2.368	9226	2.368	8050	2.368	7616
	2.38471	7070	2.38471	5429	2.38471	6094	2.38471	7903	2.38471	9025	2.38471	7855	2.38471	7392
	2.40143	7002	2.40143	5283	2.40143	5939	2.40143	7559	2.40143	8999	2.40143	7420	2.40143	7297
	2.41814	6721	2.41814	5176	2.41814	5897	2.41814	7306	2.41814	9013	2.41814	7298	2.41814	7087
	2.43485	6242	2.43485	5258	2.43485	6053	2.43485	6993	2.43485	8672	2.43485	7303	2.43485	7113
	2.45156	6189	2.45156	5162	2.45156	5793	2.45156	6731	2.45156	8282	2.45156	7309	2.45156	6912
	2.46827	6181	2.46827	4952	2.46827	5478	2.46827	6496	2.46827	8401	2.46827	7022	2.46827	6769
	2.48498	6045	2.48498	4907	2.48498	5342	2.48498	6415	2.48498	8153	2.48498	6970	2.48498	6674
	2.50169	5752	2.50169	4710	2.50169	5188	2.50169	6069	2.50169	8076	2.50169	6816	2.50169	6491
	2.51841	5547	2.51841	4580	2.51841	5092	2.51841	5827	2.51841	7941	2.51841	6710	2.51841	6434
	2.53512	5495	2.53512	4445	2.53512	5068	2.53512	5731	2.53512	7799	2.53512	6530	2.53512	6141
	2.55183	5236	2.55183	4443	2.55183	4777	2.55183	5519	2.55183	7600	2.55183	6515	2.55183	6111
	2.56854	5361	2.56854	4225	2.56854	4565	2.56854	5314	2.56854	7642	2.56854	6335	2.56854	5986
	2.58525	5304	2.58525	4089	2.58525	4401	2.58525	5453	2.58525	7597	2.58525	6232	2.58525	5847
	2.60196	5150	2.60196	4215	2.60196	4609	2.60196	5154	2.60196	7361	2.60196	6072	2.60196	5841
	2.61867	4799	2.61867	4174	2.61867	4477	2.61867	4942	2.61867	7358	2.61867	5968	2.61867	5625
	2.63538	4751	2.63538	4078	2.63538	4255	2.63538	4872	2.63538	7054	2.63538	5968	2.63538	5423
	2.6521	4725	2.6521	4070	2.6521	4131	2.6521	4855	2.6521	6899	2.6521	5779	2.6521	5494
	2.66881	4631	2.66881	3912	2.66881	4169	2.66881	4783	2.66881	6901	2.66881	5806	2.66881	5435
	2.68552	4604	2.68552	3743	2.68552	4043	2.68552	4590	2.68552	6814	2.68552	5708	2.68552	5325
	2.70223	4459	2.70223	3794	2.70223	3949	2.70223	4540	2.70223	6701	2.70223	5512	2.70223	5248
	2.71894	4451	2.71894	3801	2.71894	3873	2.71894	4393	2.71894	6579	2.71894	5400	2.71894	5073
	2.73565	4396	2.73565	3778	2.73565	3739	2.73565	4344	2.73565	6505	2.73565	5360	2.73565	4985
	2.75236	4314	2.75236	3536	2.75236	3633	2.75236	4208	2.75236	6511	2.75236	5320	2.75236	4866
	2.76907	4229	2.76907	3473	2.76907	3661	2.76907	4123	2.76907	6456	2.76907	5070	2.76907	4835
	2.78579	4150	2.78579	3504	2.78579	3498	2.78579	3931	2.78579	6377	2.78579	5192	2.78579	4733
	2.8025	4036	2.8025	3385	2.8025	3485	2.8025	4097	2.8025	6257	2.8025	5046	2.8025	4725
	2.81921	3911	2.81921	3437	2.81921	3549	2.81921	3695	2.81921	6183	2.81921	4999	2.81921	4792
	2.83592	3899	2.83592	3320	2.83592	3454	2.83592	3703	2.83592	6032	2.83592	4912	2.83592	4534
	2.85263	3904	2.85263	3310	2.85263	3397	2.85263	3667	2.85263	6052	2.85263	4864	2.85263	4431
	2.86934	3820	2.86934	3241	2.86934	3178	2.86934	3533	2.86934	5918	2.86934	4815	2.86934	4524
	2.88605	3776	2.88605	3178	2.88605	3219	2.88605	3543	2.88605	5675	2.88605	4719	2.88605	4306
	2.90276	3605	2.90276	3246	2.90276	3286	2.90276	3485	2.90276	5628	2.90276	4634	2.90276	4234
	2.91948	3552	2.91948	3129	2.91948	3181	2.91948	3479	2.91948	5600	2.91948	4535	2.91948	4323
	2.93619	3546	2.93619	3110	2.93619	3027	2.93619	3366	2.93619	5585	2.93619	4604	2.93619	4248
	2.9529	3548	2.9529	2945	2.9529	3007	2.9529	3326	2.9529	5593	2.9529	4447	2.9529	4033
	2.96961	3489	2.96961	2960	2.96961	2979	2.96961	3223	2.96961	5367	2.96961	4432	2.96961	4027
	2.98632	3477	2.98632	2933	2.98632	2933	2.98632	3126	2.98632	5548	2.98632	4272	2.98632	4076
	3.00303	3287	3.00303	2998	3.00303	2847	3.00303	3117	3.00303	5280	3.00303	4194	3.00303	3936
	3.01974	3352	3.01974	2893	3.01974	2986	3.01974	3146	3.01974	5324	3.01974	4298	3.01974	3985
	3.03645	3352	3.03645	2937	3.03645	2812	3.03645	3047	3.03645	5226	3.03645	4164	3.03645	3818
	3.05317	3226	3.05317	2866	3.05317	2825	3.05317	3014	3.05317	5078	3.05317	4152	3.05317	3830
	3.06988	3250	3.06988	2771	3.06988	2837	3.06988	2963	3.06988	5105	3.06988	4104	3.06988	3766
	3.08659	3169	3.08659	2872	3.08659	2818	3.08659	3006	3.08659	5012	3.08659	4024	3.08659	3731
	3.1033	3187	3.1033	2760	3.1033	2742	3.1033	2931	3.1033	4964	3.1033	4089	3.1033	3727
	3.12001	3136	3.12001	2808	3.12001	2734	3.12001	2914	3.12001	4965	3.12001	4085	3.12001	3623
	3.13672	3064	3.13672	2743	3.13672	2765	3.13672	2925	3.13672	4850	3.13672	3954	3.13672	3761
	3.15343	3084	3.15343	2643	3.15343	2653	3.15343	2795	3.15343	4888	3.15343	3907	3.15343	3661
	3.17014	3066	3.17014	2638	3.17014	2632	3.17014	2848	3.17014	4865	3.17014	3943	3.17014	3641
	3.18686	3033	3.18686	2660	3.18686	2635	3.18686	2769	3.18686	4783	3.18686	3772	3.18686	3477
	3.20357	2995	3.20357	2617	3.20357	2572	3.20357	2713	3.20357	4701	3.20357	3896	3.20357	3358
	3.22028	2963	3.22028	2628	3.22028	2558	3.22028	2681	3.22028	4650	3.22028	3923	3.22028	3492
	3.23699	2912	3.23699	2659	3.23699	2616	3.23699	2623	3.23699	4684	3.23699	3727	3.23699	3296
	3.2537	2911	3.2537	2636	3.2537	2478	3.2537	2679	3.2537	4591	3.2537	3619	3.2537	3310
	3.27041	2825	3.27041	2543	3.27041	2497	3.27041	2509	3.27041	4417	3.27041	3623	3.27041	3473
	3.28712	2845	3.28712	2483	3.28712	2452	3.28712	2555	3.28712	4549	3.28712	3632	3.28712	3244
	3.30383	2839	3.30383	2480	3.30383	2516	3.30383	2631	3.30383	4470	3.30383	3582	3.30383	3282
	3.32055	2887	3.32055	2625	3.32055	2456	3.32055	2631	3.32055	4471	3.32055	3617	3.32055	3246
	3.33726	2886	3.33726	2483	3.33726	2370	3.33726	2581	3.33726	4403	3.33726	3577	3.33726	3287
	3.35397	2779	3.35397	2417	3.35397	2431	3.35397	2516	3.35397	4354	3.35397	3477	3.35397	3127
	3.37068	2760	3.37068	2447	3.37068	2388	3.37068	2482	3.37068	4253	3.37068	3324	3.37068	3140
	3.38739	2786	3.38739	2385	3.38739	2386	3.38739	2464	3.38739	4386	3.38739	3486	3.38739	3229
	3.4041	2710	3.4041	2474	3.4041	2415	3.4041	2415	3.4041	4350	3.4041	3378	3.4041	3105
	3.42081	2815	3.42081	2464	3.42081	2417	3.42081	2436	3.42081	4198	3.42081	3354	3.42081	3074
	3.43752	2689	3.43752	2377	3.43752	2298	3.43752	2411	3.43752	4217	3.43752	3254	3.43752	3078
	3.45424	2727	3.45424	2372	3.45424	2332	3.45424	2425	3.45424	4105	3.45424	3300	3.45424	2899
	3.47095	2607	3.47095	2321	3.47095	2273	3.47095	2422	3.47095	4095	3.47095	3238	3.47095	3059
	3.48766	2642	3.48766	2409	3.48766	2220	3.48766	2335	3.48766	4191	3.48766	3174	3.48766	2952
	3.50437	2652	3.50437	2206	3.50437	2222	3.50437	2345	3.50437	4168	3.50437	3227	3.50437	2953
	3.52108	2530	3.52108	2262	3.52108	2290	3.52108	2299	3.52108	4047	3.52108	3343	3.52108	2976
	3.53779	2654	3.53779	2297	3.53779	2240	3.53779	2313	3.53779	3854	3.53779	3109	3.53779	2901
	3.5545	2565	3.5545	2337	3.5545	2135	3.5545	2256	3.5545	3873	3.5545	3084	3.5545	2892
	3.57122	2465	3.57122	2233	3.57122	2208	3.57122	2273	3.57122	3875	3.57122	3165	3.57122	2821
	3.58793	2443	3.58793	2223	3.58793	2151	3.58793	2185	3.58793	3867	3.58793	3161	3.58793	2909
	3.60464	2456	3.60464	2176	3.60464	2152	3.60464	2256	3.60464	3692	3.60464	3057	3.60464	2904
	3.62135	2474	3.62135	2163	3.62135	2103	3.62135	2192	3.62135	3758	3.62135	3029	3.62135	2859
	3.63806	2480	3.63806	2181	3.63806	2058	3.63806	2221	3.63806	3692	3.63806	2983	3.63806	2703
	3.65477	2384	3.65477	2176	3.65477	2118	3.65477	2089	3.65477	3723	3.65477	3107	3.65477	2688
	3.67148	2389	3.67148	2144	3.67148	2086	3.67148	2172	3.67148	3644	3.67148	3066	3.67148	2664
	3.68819	2369	3.68819	2125	3.68819	2035	3.68819	2141	3.68819	3739	3.68819	2908	3.68819	2641
	3.70491	2384	3.70491	2198	3.70491	2110	3.70491	2084	3.70491	3616	3.70491	2958	3.70491	2665
	3.72162	2342	3.72162	2070	3.72162	2035	3.72162	2089	3.72162	3780	3.72162	2911	3.72162	2672
	3.73833	2327	3.73833	2116	3.73833	2026	3.73833	2095	3.73833	3441	3.73833	2886	3.73833	2601
	3.75504	2353	3.75504	2091	3.75504	1997	3.75504	2040	3.75504	3492	3.75504	2893	3.75504	2602
	3.77175	2254	3.77175	2156	3.77175	2022	3.77175	2080	3.77175	3471	3.77175	2881	3.77175	2615
	3.78846	2377	3.78846	2031	3.78846	1964	3.78846	2007	3.78846	3488	3.78846	2798	3.78846	2622
	3.80517	2299	3.80517	2103	3.80517	1913	3.80517	2056	3.80517	3402	3.80517	2758	3.80517	2556
	3.82188	2271	3.82188	1982	3.82188	1903	3.82188	1992	3.82188	3468	3.82188	2779	3.82188	2581
	3.8386	2250	3.8386	2023	3.8386	1978	3.8386	2055	3.8386	3286	3.8386	2764	3.8386	2608
	3.85531	2187	3.85531	2032	3.85531	2059	3.85531	1951	3.85531	3361	3.85531	2711	3.85531	2492
	3.87202	2184	3.87202	1965	3.87202	1909	3.87202	1936	3.87202	3301	3.87202	2701	3.87202	2426
	3.88873	2269	3.88873	1959	3.88873	1896	3.88873	1911	3.88873	3381	3.88873	2778	3.88873	2389
	3.90544	2101	3.90544	1968	3.90544	1864	3.90544	1958	3.90544	3353	3.90544	2731	3.90544	2465
	3.92215	2173	3.92215	2015	3.92215	1871	3.92215	1966	3.92215	3329	3.92215	2711	3.92215	2481
	3.93886	2175	3.93886	1883	3.93886	1946	3.93886	1930	3.93886	3253	3.93886	2774	3.93886	2420
	3.95557	2118	3.95557	2021	3.95557	1921	3.95557	1957	3.95557	3226	3.95557	2730	3.95557	2400
	3.97229	2134	3.97229	1956	3.97229	1933	3.97229	1860	3.97229	3221	3.97229	2669	3.97229	2285
	3.989	2103	3.989	1958	3.989	1922	3.989	1825	3.989	3125	3.989	2728	3.989	2386
	4.00571	2082	4.00571	1933	4.00571	1954	4.00571	1918	4.00571	3203	4.00571	2655	4.00571	2430
	4.02242	2063	4.02242	1977	4.02242	1923	4.02242	1931	4.02242	3178	4.02242	2648	4.02242	2310
	4.03913	2054	4.03913	1965	4.03913	1820	4.03913	1897	4.03913	3193	4.03913	2495	4.03913	2433
	4.05584	2031	4.05584	1927	4.05584	1858	4.05584	1842	4.05584	3141	4.05584	2556	4.05584	2318
	4.07255	2106	4.07255	1944	4.07255	1871	4.07255	1879	4.07255	3071	4.07255	2549	4.07255	2428
	4.08926	2054	4.08926	1836	4.08926	1853	4.08926	1850	4.08926	3121	4.08926	2508	4.08926	2325
	4.10598	2130	4.10598	1934	4.10598	1834	4.10598	1844	4.10598	3034	4.10598	2485	4.10598	2326
	4.12269	2126	4.12269	1967	4.12269	1884	4.12269	1832	4.12269	3037	4.12269	2547	4.12269	2250
	4.1394	2045	4.1394	1933	4.1394	1899	4.1394	1914	4.1394	3115	4.1394	2494	4.1394	2310
	4.15611	2095	4.15611	1938	4.15611	1828	4.15611	1879	4.15611	2955	4.15611	2486	4.15611	2386
	4.17282	2079	4.17282	1918	4.17282	1858	4.17282	1907	4.17282	3046	4.17282	2567	4.17282	2317
	4.18953	2016	4.18953	1927	4.18953	1767	4.18953	1791	4.18953	2961	4.18953	2415	4.18953	2359
	4.20624	2008	4.20624	1969	4.20624	1804	4.20624	1855	4.20624	2998	4.20624	2399	4.20624	2295
	4.22295	2044	4.22295	1923	4.22295	1826	4.22295	1887	4.22295	2912	4.22295	2472	4.22295	2191
	4.23967	2029	4.23967	1908	4.23967	1835	4.23967	1833	4.23967	2949	4.23967	2412	4.23967	2229
	4.25638	2024	4.25638	1874	4.25638	1820	4.25638	1870	4.25638	2957	4.25638	2367	4.25638	2133
	4.27309	1983	4.27309	1874	4.27309	1729	4.27309	1761	4.27309	2876	4.27309	2367	4.27309	2213
	4.2898	2084	4.2898	1875	4.2898	1840	4.2898	1794	4.2898	2890	4.2898	2308	4.2898	2346
	4.30651	2089	4.30651	1924	4.30651	1776	4.30651	1825	4.30651	2875	4.30651	2508	4.30651	2248
	4.32322	1956	4.32322	1860	4.32322	1783	4.32322	1847	4.32322	2900	4.32322	2345	4.32322	2195
	4.33993	1978	4.33993	1842	4.33993	1815	4.33993	1756	4.33993	2908	4.33993	2448	4.33993	2185
	4.35664	1927	4.35664	1833	4.35664	1830	4.35664	1708	4.35664	2927	4.35664	2482	4.35664	2144
	4.37336	1966	4.37336	1800	4.37336	1781	4.37336	1830	4.37336	2896	4.37336	2371	4.37336	2185
	4.39007	1855	4.39007	1901	4.39007	1768	4.39007	1848	4.39007	2795	4.39007	2429	4.39007	2101
	4.40678	1947	4.40678	1840	4.40678	1786	4.40678	1816	4.40678	2779	4.40678	2386	4.40678	2142
	4.42349	1925	4.42349	1817	4.42349	1790	4.42349	1779	4.42349	2860	4.42349	2301	4.42349	2128
	4.4402	1930	4.4402	1809	4.4402	1764	4.4402	1712	4.4402	2652	4.4402	2337	4.4402	2174
	4.45691	1986	4.45691	1713	4.45691	1845	4.45691	1775	4.45691	2741	4.45691	2293	4.45691	2157
	4.47362	2054	4.47362	1901	4.47362	1746	4.47362	1764	4.47362	2802	4.47362	2288	4.47362	2212
	4.49033	1983	4.49033	1795	4.49033	1810	4.49033	1852	4.49033	2685	4.49033	2297	4.49033	2085
	4.50705	2001	4.50705	1758	4.50705	1768	4.50705	1792	4.50705	2686	4.50705	2288	4.50705	2044
	4.52376	1946	4.52376	1856	4.52376	1772	4.52376	1781	4.52376	2794	4.52376	2340	4.52376	2042
	4.54047	1927	4.54047	1829	4.54047	1780	4.54047	1786	4.54047	2718	4.54047	2244	4.54047	2179
	4.55718	1951	4.55718	1856	4.55718	1789	4.55718	1765	4.55718	2716	4.55718	2333	4.55718	2135
	4.57389	1879	4.57389	1820	4.57389	1694	4.57389	1739	4.57389	2675	4.57389	2228	4.57389	2051
	4.5906	1968	4.5906	1756	4.5906	1667	4.5906	1842	4.5906	2676	4.5906	2277	4.5906	2137
	4.60731	1925	4.60731	1744	4.60731	1698	4.60731	1783	4.60731	2656	4.60731	2251	4.60731	2106
	4.62403	1894	4.62403	1755	4.62403	1797	4.62403	1721	4.62403	2694	4.62403	2261	4.62403	2126
	4.64074	1929	4.64074	1786	4.64074	1682	4.64074	1734	4.64074	2618	4.64074	2280	4.64074	2042
	4.65745	1913	4.65745	1782	4.65745	1713	4.65745	1734	4.65745	2692	4.65745	2236	4.65745	2200
	4.67416	1874	4.67416	1733	4.67416	1721	4.67416	1724	4.67416	2665	4.67416	2245	4.67416	2007
	4.69087	1908	4.69087	1771	4.69087	1722	4.69087	1753	4.69087	2518	4.69087	2191	4.69087	2010
	4.70758	1874	4.70758	1721	4.70758	1783	4.70758	1745	4.70758	2621	4.70758	2209	4.70758	2065
	4.72429	1846	4.72429	1728	4.72429	1710	4.72429	1699	4.72429	2538	4.72429	2168	4.72429	1986
	4.741	1881	4.741	1808	4.741	1701	4.741	1730	4.741	2626	4.741	2170	4.741	2065
	4.75772	1925	4.75772	1791	4.75772	1686	4.75772	1719	4.75772	2508	4.75772	2221	4.75772	1992
	4.77443	1872	4.77443	1755	4.77443	1673	4.77443	1739	4.77443	2560	4.77443	2219	4.77443	1951
	4.79114	1831	4.79114	1805	4.79114	1704	4.79114	1711	4.79114	2592	4.79114	2160	4.79114	2047
	4.80785	1890	4.80785	1753	4.80785	1723	4.80785	1718	4.80785	2592	4.80785	2161	4.80785	2135
	4.82456	1870	4.82456	1776	4.82456	1697	4.82456	1671	4.82456	2448	4.82456	2165	4.82456	2017
	4.84127	1853	4.84127	1733	4.84127	1700	4.84127	1761	4.84127	2516	4.84127	2160	4.84127	1950
	4.85798	1837	4.85798	1756	4.85798	1677	4.85798	1749	4.85798	2442	4.85798	2040	4.85798	2013
	4.87469	1859	4.87469	1815	4.87469	1738	4.87469	1620	4.87469	2420	4.87469	2126	4.87469	1998
	4.89141	1858	4.89141	1819	4.89141	1655	4.89141	1705	4.89141	2515	4.89141	2110	4.89141	2006
	4.90812	1853	4.90812	1729	4.90812	1759	4.90812	1719	4.90812	2481	4.90812	2160	4.90812	2032
	4.92483	1771	4.92483	1756	4.92483	1750	4.92483	1657	4.92483	2399	4.92483	2145	4.92483	2043
	4.94154	1800	4.94154	1679	4.94154	1718	4.94154	1759	4.94154	2394	4.94154	2137	4.94154	2007
	4.95825	1846	4.95825	1776	4.95825	1665	4.95825	1731	4.95825	2410	4.95825	2155	4.95825	1917
	4.97496	1779	4.97496	1711	4.97496	1711	4.97496	1745	4.97496	2418	4.97496	2146	4.97496	1967
	4.99167	1805	4.99167	1763	4.99167	1732	4.99167	1661	4.99167	2501	4.99167	2133	4.99167	1999
	5.00838	1761	5.00838	1734	5.00838	1693	5.00838	1619	5.00838	2469	5.00838	2052	5.00838	2007
	5.0251	1760	5.0251	1707	5.0251	1801	5.0251	1638	5.0251	2379	5.0251	2066	5.0251	1977
	5.04181	1886	5.04181	1664	5.04181	1686	5.04181	1678	5.04181	2344	5.04181	2162	5.04181	2027
	5.05852	1838	5.05852	1740	5.05852	1666	5.05852	1669	5.05852	2398	5.05852	2020	5.05852	2000
	5.07523	1790	5.07523	1781	5.07523	1714	5.07523	1668	5.07523	2411	5.07523	2115	5.07523	1934
	5.09194	1805	5.09194	1649	5.09194	1759	5.09194	1641	5.09194	2374	5.09194	2107	5.09194	1896
	5.10865	1867	5.10865	1758	5.10865	1744	5.10865	1600	5.10865	2367	5.10865	1971	5.10865	1908
	5.12536	1788	5.12536	1766	5.12536	1735	5.12536	1592	5.12536	2351	5.12536	2101	5.12536	2006
	5.14207	1806	5.14207	1682	5.14207	1733	5.14207	1706	5.14207	2360	5.14207	2038	5.14207	1879
	5.15879	1737	5.15879	1723	5.15879	1684	5.15879	1691	5.15879	2367	5.15879	2103	5.15879	1887
	5.1755	1798	5.1755	1676	5.1755	1600	5.1755	1648	5.1755	2250	5.1755	2018	5.1755	2042
	5.19221	1792	5.19221	1790	5.19221	1719	5.19221	1647	5.19221	2362	5.19221	2010	5.19221	1958
	5.20892	1760	5.20892	1735	5.20892	1699	5.20892	1619	5.20892	2308	5.20892	2034	5.20892	1909
	5.22563	1725	5.22563	1684	5.22563	1711	5.22563	1665	5.22563	2305	5.22563	2032	5.22563	1922
	5.24234	1784	5.24234	1701	5.24234	1619	5.24234	1621	5.24234	2290	5.24234	2043	5.24234	1947
	5.25905	1790	5.25905	1632	5.25905	1657	5.25905	1658	5.25905	2242	5.25905	1982	5.25905	1880
	5.27576	1745	5.27576	1807	5.27576	1682	5.27576	1649	5.27576	2348	5.27576	2039	5.27576	1961
	5.29248	1736	5.29248	1758	5.29248	1617	5.29248	1549	5.29248	2320	5.29248	2013	5.29248	1865
	5.30919	1708	5.30919	1632	5.30919	1588	5.30919	1601	5.30919	2272	5.30919	2060	5.30919	1923
	5.3259	1801	5.3259	1636	5.3259	1677	5.3259	1581	5.3259	2304	5.3259	2024	5.3259	1895
	5.34261	1783	5.34261	1708	5.34261	1607	5.34261	1575	5.34261	2315	5.34261	2016	5.34261	1872
	5.35932	1774	5.35932	1672	5.35932	1615	5.35932	1603	5.35932	2333	5.35932	2044	5.35932	1864
	5.37603	1726	5.37603	1668	5.37603	1648	5.37603	1576	5.37603	2307	5.37603	1981	5.37603	1963
	5.39274	1775	5.39274	1678	5.39274	1675	5.39274	1648	5.39274	2218	5.39274	1981	5.39274	1856
	5.40945	1736	5.40945	1708	5.40945	1653	5.40945	1617	5.40945	2138	5.40945	1938	5.40945	1896
	5.42617	1684	5.42617	1641	5.42617	1663	5.42617	1592	5.42617	2252	5.42617	1970	5.42617	1820
	5.44288	1765	5.44288	1664	5.44288	1602	5.44288	1651	5.44288	2217	5.44288	1993	5.44288	1894
	5.45959	1724	5.45959	1604	5.45959	1649	5.45959	1639	5.45959	2180	5.45959	1907	5.45959	1853
	5.4763	1737	5.4763	1605	5.4763	1561	5.4763	1577	5.4763	2278	5.4763	1966	5.4763	1806
	5.49301	1723	5.49301	1617	5.49301	1604	5.49301	1604	5.49301	2256	5.49301	1897	5.49301	1836
	5.50972	1684	5.50972	1640	5.50972	1604	5.50972	1584	5.50972	2269	5.50972	1946	5.50972	1913
	5.52643	1724	5.52643	1587	5.52643	1564	5.52643	1657	5.52643	2128	5.52643	1916	5.52643	1885
	5.54314	1714	5.54314	1652	5.54314	1673	5.54314	1623	5.54314	2067	5.54314	1946	5.54314	1819
	5.55986	1679	5.55986	1705	5.55986	1646	5.55986	1690	5.55986	2214	5.55986	1959	5.55986	1823
	5.57657	1597	5.57657	1583	5.57657	1576	5.57657	1613	5.57657	2162	5.57657	1949	5.57657	1844
	5.59328	1656	5.59328	1598	5.59328	1664	5.59328	1641	5.59328	2198	5.59328	1834	5.59328	1848
	5.60999	1766	5.60999	1654	5.60999	1573	5.60999	1690	5.60999	2170	5.60999	1923	5.60999	1748
	5.6267	1746	5.6267	1666	5.6267	1583	5.6267	1649	5.6267	2223	5.6267	1949	5.6267	1897
	5.64341	1681	5.64341	1655	5.64341	1666	5.64341	1555	5.64341	2147	5.64341	1881	5.64341	1838
	5.66012	1695	5.66012	1692	5.66012	1572	5.66012	1588	5.66012	2059	5.66012	1855	5.66012	1727
	5.67684	1704	5.67684	1572	5.67684	1602	5.67684	1592	5.67684	2131	5.67684	1872	5.67684	1764
	5.69355	1714	5.69355	1655	5.69355	1563	5.69355	1611	5.69355	2158	5.69355	1891	5.69355	1789
	5.71026	1745	5.71026	1557	5.71026	1628	5.71026	1602	5.71026	2119	5.71026	1875	5.71026	1811
	5.72697	1667	5.72697	1627	5.72697	1602	5.72697	1591	5.72697	2054	5.72697	1957	5.72697	1807
	5.74368	1701	5.74368	1647	5.74368	1554	5.74368	1563	5.74368	2109	5.74368	1864	5.74368	1789
	5.76039	1673	5.76039	1653	5.76039	1610	5.76039	1588	5.76039	2135	5.76039	1847	5.76039	1857
	5.7771	1604	5.7771	1625	5.7771	1627	5.7771	1549	5.7771	2164	5.7771	1868	5.7771	1811
	5.79381	1636	5.79381	1597	5.79381	1669	5.79381	1544	5.79381	2038	5.79381	1853	5.79381	1792
	5.81053	1610	5.81053	1600	5.81053	1518	5.81053	1583	5.81053	2071	5.81053	1848	5.81053	1887
	5.82724	1630	5.82724	1639	5.82724	1598	5.82724	1547	5.82724	2164	5.82724	1894	5.82724	1812
	5.84395	1644	5.84395	1578	5.84395	1562	5.84395	1605	5.84395	2120	5.84395	1877	5.84395	1736
	5.86066	1620	5.86066	1669	5.86066	1626	5.86066	1549	5.86066	2172	5.86066	1846	5.86066	1776
	5.87737	1701	5.87737	1628	5.87737	1557	5.87737	1581	5.87737	2101	5.87737	1930	5.87737	1766
	5.89408	1672	5.89408	1570	5.89408	1572	5.89408	1550	5.89408	2056	5.89408	1822	5.89408	1812
	5.91079	1637	5.91079	1578	5.91079	1523	5.91079	1541	5.91079	2125	5.91079	1888	5.91079	1775
	5.9275	1752	5.9275	1608	5.9275	1550	5.9275	1538	5.9275	2054	5.9275	1803	5.9275	1775
	5.94422	1627	5.94422	1628	5.94422	1572	5.94422	1595	5.94422	2079	5.94422	1853	5.94422	1665
	5.96093	1664	5.96093	1584	5.96093	1530	5.96093	1517	5.96093	2120	5.96093	1734	5.96093	1741
	5.97764	1635	5.97764	1587	5.97764	1547	5.97764	1549	5.97764	2099	5.97764	1819	5.97764	1766
	5.99435	1675	5.99435	1590	5.99435	1593	5.99435	1546	5.99435	2051	5.99435	1909	5.99435	1694
	6.01106	1653	6.01106	1621	6.01106	1610	6.01106	1605	6.01106	2040	6.01106	1811	6.01106	1729
	6.02777	1647	6.02777	1571	6.02777	1642	6.02777	1496	6.02777	2062	6.02777	1852	6.02777	1739
	6.04448	1605	6.04448	1576	6.04448	1511	6.04448	1615	6.04448	2038	6.04448	1808	6.04448	1848
	6.06119	1640	6.06119	1637	6.06119	1571	6.06119	1566	6.06119	1986	6.06119	1777	6.06119	1716
	6.07791	1672	6.07791	1548	6.07791	1535	6.07791	1566	6.07791	1995	6.07791	1763	6.07791	1728
	6.09462	1621	6.09462	1557	6.09462	1505	6.09462	1541	6.09462	1991	6.09462	1818	6.09462	1757
	6.11133	1686	6.11133	1549	6.11133	1594	6.11133	1512	6.11133	1951	6.11133	1730	6.11133	1725
	6.12804	1659	6.12804	1648	6.12804	1453	6.12804	1509	6.12804	1995	6.12804	1766	6.12804	1800
	6.14475	1567	6.14475	1583	6.14475	1610	6.14475	1499	6.14475	2009	6.14475	1855	6.14475	1740
	6.16146	1643	6.16146	1528	6.16146	1556	6.16146	1564	6.16146	2004	6.16146	1862	6.16146	1683
	6.17817	1604	6.17817	1615	6.17817	1482	6.17817	1544	6.17817	1901	6.17817	1757	6.17817	1743
	6.19488	1575	6.19488	1614	6.19488	1613	6.19488	1548	6.19488	2002	6.19488	1790	6.19488	1662
	6.2116	1597	6.2116	1504	6.2116	1479	6.2116	1509	6.2116	1958	6.2116	1802	6.2116	1746
	6.22831	1670	6.22831	1632	6.22831	1492	6.22831	1517	6.22831	1967	6.22831	1822	6.22831	1681
	6.24502	1675	6.24502	1610	6.24502	1596	6.24502	1502	6.24502	1967	6.24502	1809	6.24502	1721
	6.26173	1583	6.26173	1593	6.26173	1488	6.26173	1527	6.26173	1968	6.26173	1773	6.26173	1699
	6.27844	1565	6.27844	1564	6.27844	1463	6.27844	1520	6.27844	1908	6.27844	1804	6.27844	1704
	6.29515	1671	6.29515	1631	6.29515	1571	6.29515	1492	6.29515	1963	6.29515	1792	6.29515	1759
	6.31186	1724	6.31186	1582	6.31186	1538	6.31186	1571	6.31186	1961	6.31186	1690	6.31186	1733
	6.32857	1650	6.32857	1562	6.32857	1555	6.32857	1530	6.32857	1970	6.32857	1766	6.32857	1643
	6.34529	1672	6.34529	1513	6.34529	1549	6.34529	1508	6.34529	1952	6.34529	1754	6.34529	1729
	6.362	1567	6.362	1603	6.362	1532	6.362	1457	6.362	1892	6.362	1755	6.362	1649
	6.37871	1597	6.37871	1577	6.37871	1546	6.37871	1513	6.37871	1978	6.37871	1779	6.37871	1590
	6.39542	1681	6.39542	1536	6.39542	1532	6.39542	1572	6.39542	1929	6.39542	1786	6.39542	1648
	6.41213	1631	6.41213	1595	6.41213	1479	6.41213	1533	6.41213	1920	6.41213	1712	6.41213	1717
	6.42884	1666	6.42884	1632	6.42884	1536	6.42884	1492	6.42884	1909	6.42884	1815	6.42884	1782
	6.44555	1629	6.44555	1578	6.44555	1412	6.44555	1501	6.44555	1897	6.44555	1809	6.44555	1731
	6.46226	1643	6.46226	1588	6.46226	1528	6.46226	1519	6.46226	1963	6.46226	1820	6.46226	1745
	6.47898	1632	6.47898	1604	6.47898	1532	6.47898	1540	6.47898	1955	6.47898	1783	6.47898	1721
	6.49569	1574	6.49569	1561	6.49569	1546	6.49569	1566	6.49569	1939	6.49569	1684	6.49569	1709
	6.5124	1690	6.5124	1627	6.5124	1541	6.5124	1495	6.5124	1865	6.5124	1771	6.5124	1719
	6.52911	1670	6.52911	1574	6.52911	1427	6.52911	1514	6.52911	1901	6.52911	1736	6.52911	1783
	6.54582	1612	6.54582	1557	6.54582	1487	6.54582	1476	6.54582	1942	6.54582	1768	6.54582	1760
	6.56253	1573	6.56253	1642	6.56253	1531	6.56253	1474	6.56253	1942	6.56253	1732	6.56253	1676
	6.57924	1605	6.57924	1570	6.57924	1500	6.57924	1559	6.57924	1913	6.57924	1791	6.57924	1641
	6.59595	1506	6.59595	1560	6.59595	1453	6.59595	1483	6.59595	1864	6.59595	1759	6.59595	1726
	6.61267	1522	6.61267	1561	6.61267	1392	6.61267	1433	6.61267	1959	6.61267	1782	6.61267	1703
	6.62938	1640	6.62938	1565	6.62938	1476	6.62938	1509	6.62938	1867	6.62938	1753	6.62938	1618
	6.64609	1572	6.64609	1558	6.64609	1489	6.64609	1478	6.64609	1893	6.64609	1613	6.64609	1738
	6.6628	1598	6.6628	1527	6.6628	1467	6.6628	1501	6.6628	1946	6.6628	1688	6.6628	1672
	6.67951	1611	6.67951	1581	6.67951	1448	6.67951	1501	6.67951	1872	6.67951	1682	6.67951	1713
	6.69622	1625	6.69622	1546	6.69622	1549	6.69622	1506	6.69622	1804	6.69622	1739	6.69622	1686
	6.71293	1615	6.71293	1547	6.71293	1500	6.71293	1480	6.71293	1852	6.71293	1647	6.71293	1665
	6.72965	1549	6.72965	1568	6.72965	1486	6.72965	1480	6.72965	1854	6.72965	1721	6.72965	1702
	6.74636	1603	6.74636	1561	6.74636	1489	6.74636	1495	6.74636	1783	6.74636	1725	6.74636	1673
	6.76307	1659	6.76307	1590	6.76307	1495	6.76307	1465	6.76307	1846	6.76307	1691	6.76307	1726
	6.77978	1664	6.77978	1504	6.77978	1428	6.77978	1505	6.77978	1880	6.77978	1629	6.77978	1728
	6.79649	1613	6.79649	1608	6.79649	1508	6.79649	1472	6.79649	1933	6.79649	1690	6.79649	1752
	6.8132	1668	6.8132	1486	6.8132	1464	6.8132	1494	6.8132	1860	6.8132	1630	6.8132	1793
	6.82991	1576	6.82991	1507	6.82991	1455	6.82991	1428	6.82991	1812	6.82991	1675	6.82991	1724
	6.84662	1608	6.84662	1602	6.84662	1473	6.84662	1469	6.84662	1910	6.84662	1679	6.84662	1807
	6.86334	1672	6.86334	1518	6.86334	1478	6.86334	1464	6.86334	1801	6.86334	1648	6.86334	1762
	6.88005	1578	6.88005	1547	6.88005	1457	6.88005	1510	6.88005	1830	6.88005	1641	6.88005	1798
	6.89676	1652	6.89676	1552	6.89676	1455	6.89676	1474	6.89676	1863	6.89676	1663	6.89676	1847
	6.91347	1593	6.91347	1546	6.91347	1452	6.91347	1425	6.91347	1810	6.91347	1672	6.91347	1884
	6.93018	1632	6.93018	1591	6.93018	1465	6.93018	1450	6.93018	1826	6.93018	1635	6.93018	1923
	6.94689	1635	6.94689	1605	6.94689	1394	6.94689	1404	6.94689	1739	6.94689	1727	6.94689	1939
	6.9636	1564	6.9636	1528	6.9636	1460	6.9636	1519	6.9636	1838	6.9636	1697	6.9636	1950
	6.98031	1609	6.98031	1587	6.98031	1482	6.98031	1486	6.98031	1803	6.98031	1668	6.98031	2053
	6.99703	1596	6.99703	1560	6.99703	1477	6.99703	1463	6.99703	1812	6.99703	1697	6.99703	2049
	7.01374	1544	7.01374	1514	7.01374	1459	7.01374	1458	7.01374	1847	7.01374	1703	7.01374	2130
	7.03045	1596	7.03045	1576	7.03045	1521	7.03045	1418	7.03045	1835	7.03045	1627	7.03045	2060
	7.04716	1658	7.04716	1626	7.04716	1502	7.04716	1474	7.04716	1792	7.04716	1695	7.04716	2141
	7.06387	1711	7.06387	1605	7.06387	1512	7.06387	1487	7.06387	1798	7.06387	1671	7.06387	2310
	7.08058	1664	7.08058	1596	7.08058	1483	7.08058	1413	7.08058	1801	7.08058	1694	7.08058	2467
	7.09729	1646	7.09729	1566	7.09729	1387	7.09729	1410	7.09729	1828	7.09729	1750	7.09729	2653
	7.114	1645	7.114	1576	7.114	1489	7.114	1398	7.114	1825	7.114	1848	7.114	2656
	7.13072	1733	7.13072	1604	7.13072	1421	7.13072	1404	7.13072	1856	7.13072	1749	7.13072	2815
	7.14743	1586	7.14743	1643	7.14743	1413	7.14743	1501	7.14743	1789	7.14743	1801	7.14743	3084
	7.16414	1751	7.16414	1636	7.16414	1427	7.16414	1461	7.16414	1795	7.16414	1845	7.16414	3373
	7.18085	1891	7.18085	1727	7.18085	1476	7.18085	1456	7.18085	1774	7.18085	1836	7.18085	3569
	7.19756	1716	7.19756	1639	7.19756	1461	7.19756	1461	7.19756	1786	7.19756	1777	7.19756	3765
	7.21427	1881	7.21427	1731	7.21427	1450	7.21427	1400	7.21427	1747	7.21427	1753	7.21427	3909
	7.23098	1866	7.23098	1759	7.23098	1420	7.23098	1402	7.23098	1812	7.23098	1668	7.23098	3835
	7.24769	1822	7.24769	1752	7.24769	1467	7.24769	1397	7.24769	1754	7.24769	1713	7.24769	3570
	7.26441	1692	7.26441	1837	7.26441	1431	7.26441	1377	7.26441	1790	7.26441	1658	7.26441	3099
	7.28112	1713	7.28112	1862	7.28112	1449	7.28112	1431	7.28112	1804	7.28112	1624	7.28112	2587
	7.29783	1658	7.29783	1765	7.29783	1392	7.29783	1428	7.29783	1817	7.29783	1670	7.29783	2277
	7.31454	1542	7.31454	1669	7.31454	1469	7.31454	1408	7.31454	1653	7.31454	1647	7.31454	2039
	7.33125	1498	7.33125	1506	7.33125	1400	7.33125	1325	7.33125	1711	7.33125	1682	7.33125	1856
	7.34796	1491	7.34796	1449	7.34796	1423	7.34796	1402	7.34796	1759	7.34796	1622	7.34796	1817
	7.36467	1516	7.36467	1535	7.36467	1412	7.36467	1422	7.36467	1677	7.36467	1644	7.36467	1784
	7.38138	1503	7.38138	1465	7.38138	1404	7.38138	1453	7.38138	1734	7.38138	1612	7.38138	1706
	7.3981	1436	7.3981	1463	7.3981	1370	7.3981	1440	7.3981	1725	7.3981	1535	7.3981	1690
	7.41481	1522	7.41481	1443	7.41481	1459	7.41481	1460	7.41481	1692	7.41481	1588	7.41481	1702
	7.43152	1544	7.43152	1430	7.43152	1366	7.43152	1352	7.43152	1748	7.43152	1555	7.43152	1608
	7.44823	1458	7.44823	1486	7.44823	1472	7.44823	1404	7.44823	1688	7.44823	1631	7.44823	1617
	7.46494	1459	7.46494	1460	7.46494	1320	7.46494	1373	7.46494	1741	7.46494	1532	7.46494	1634
	7.48165	1500	7.48165	1460	7.48165	1373	7.48165	1380	7.48165	1718	7.48165	1546	7.48165	1568
	7.49836	1429	7.49836	1480	7.49836	1402	7.49836	1342	7.49836	1720	7.49836	1568	7.49836	1617
	7.51507	1522	7.51507	1436	7.51507	1395	7.51507	1363	7.51507	1630	7.51507	1522	7.51507	1592
	7.53179	1482	7.53179	1391	7.53179	1408	7.53179	1418	7.53179	1697	7.53179	1556	7.53179	1630
	7.5485	1432	7.5485	1406	7.5485	1347	7.5485	1345	7.5485	1643	7.5485	1506	7.5485	1564
	7.56521	1469	7.56521	1422	7.56521	1378	7.56521	1424	7.56521	1718	7.56521	1531	7.56521	1546
	7.58192	1483	7.58192	1452	7.58192	1404	7.58192	1374	7.58192	1609	7.58192	1563	7.58192	1563
	7.59863	1520	7.59863	1440	7.59863	1360	7.59863	1380	7.59863	1647	7.59863	1545	7.59863	1538
	7.61534	1406	7.61534	1477	7.61534	1424	7.61534	1392	7.61534	1680	7.61534	1547	7.61534	1536
	7.63205	1459	7.63205	1418	7.63205	1362	7.63205	1364	7.63205	1668	7.63205	1555	7.63205	1521
	7.64876	1439	7.64876	1451	7.64876	1393	7.64876	1354	7.64876	1530	7.64876	1513	7.64876	1540
	7.66548	1405	7.66548	1395	7.66548	1337	7.66548	1359	7.66548	1637	7.66548	1463	7.66548	1539
	7.68219	1474	7.68219	1471	7.68219	1371	7.68219	1344	7.68219	1641	7.68219	1563	7.68219	1459
	7.6989	1458	7.6989	1390	7.6989	1359	7.6989	1350	7.6989	1623	7.6989	1533	7.6989	1538
	7.71561	1414	7.71561	1490	7.71561	1450	7.71561	1392	7.71561	1607	7.71561	1580	7.71561	1525
	7.73232	1404	7.73232	1474	7.73232	1422	7.73232	1351	7.73232	1572	7.73232	1525	7.73232	1492
	7.74903	1433	7.74903	1375	7.74903	1385	7.74903	1346	7.74903	1585	7.74903	1537	7.74903	1593
	7.76574	1474	7.76574	1430	7.76574	1326	7.76574	1376	7.76574	1627	7.76574	1533	7.76574	1462
	7.78246	1425	7.78246	1400	7.78246	1331	7.78246	1369	7.78246	1608	7.78246	1498	7.78246	1485
	7.79917	1450	7.79917	1356	7.79917	1357	7.79917	1345	7.79917	1673	7.79917	1534	7.79917	1484
	7.81588	1392	7.81588	1348	7.81588	1336	7.81588	1351	7.81588	1577	7.81588	1527	7.81588	1461
	7.83259	1432	7.83259	1431	7.83259	1320	7.83259	1310	7.83259	1665	7.83259	1462	7.83259	1514
	7.8493	1416	7.8493	1390	7.8493	1369	7.8493	1335	7.8493	1619	7.8493	1508	7.8493	1432
	7.86601	1358	7.86601	1419	7.86601	1349	7.86601	1396	7.86601	1614	7.86601	1532	7.86601	1426
	7.88272	1430	7.88272	1400	7.88272	1372	7.88272	1444	7.88272	1552	7.88272	1456	7.88272	1476
	7.89943	1437	7.89943	1322	7.89943	1358	7.89943	1370	7.89943	1619	7.89943	1485	7.89943	1465
	7.91615	1441	7.91615	1428	7.91615	1292	7.91615	1362	7.91615	1614	7.91615	1501	7.91615	1453
	7.93286	1274	7.93286	1409	7.93286	1355	7.93286	1404	7.93286	1495	7.93286	1555	7.93286	1490
	7.94957	1341	7.94957	1417	7.94957	1355	7.94957	1385	7.94957	1559	7.94957	1506	7.94957	1455
	7.96628	1410	7.96628	1430	7.96628	1342	7.96628	1353	7.96628	1563	7.96628	1543	7.96628	1464
	7.98299	1425	7.98299	1364	7.98299	1364	7.98299	1365	7.98299	1556	7.98299	1446	7.98299	1429
	7.9997	1351	7.9997	1461	7.9997	1304	7.9997	1309	7.9997	1536	7.9997	1472	7.9997	1459
	8.01641	1385	8.01641	1363	8.01641	1333	8.01641	1311	8.01641	1671	8.01641	1505	8.01641	1463
	8.03312	1377	8.03312	1363	8.03312	1354	8.03312	1399	8.03312	1523	8.03312	1489	8.03312	1405
	8.04984	1322	8.04984	1389	8.04984	1321	8.04984	1351	8.04984	1484	8.04984	1462	8.04984	1458
	8.06655	1345	8.06655	1291	8.06655	1368	8.06655	1338	8.06655	1575	8.06655	1481	8.06655	1399
	8.08326	1439	8.08326	1355	8.08326	1337	8.08326	1336	8.08326	1491	8.08326	1510	8.08326	1458
	8.09997	1358	8.09997	1374	8.09997	1317	8.09997	1370	8.09997	1569	8.09997	1554	8.09997	1440
	8.11668	1417	8.11668	1356	8.11668	1296	8.11668	1320	8.11668	1508	8.11668	1428	8.11668	1441
	8.13339	1358	8.13339	1327	8.13339	1316	8.13339	1324	8.13339	1559	8.13339	1531	8.13339	1445
	8.1501	1328	8.1501	1331	8.1501	1329	8.1501	1331	8.1501	1591	8.1501	1494	8.1501	1401
	8.16681	1411	8.16681	1307	8.16681	1333	8.16681	1293	8.16681	1511	8.16681	1498	8.16681	1396
	8.18353	1417	8.18353	1436	8.18353	1248	8.18353	1329	8.18353	1538	8.18353	1403	8.18353	1401
	8.20024	1417	8.20024	1414	8.20024	1272	8.20024	1355	8.20024	1522	8.20024	1426	8.20024	1455
	8.21695	1320	8.21695	1346	8.21695	1278	8.21695	1357	8.21695	1549	8.21695	1391	8.21695	1364
	8.23366	1320	8.23366	1320	8.23366	1333	8.23366	1333	8.23366	1604	8.23366	1460	8.23366	1444
	8.25037	1266	8.25037	1369	8.25037	1355	8.25037	1335	8.25037	1566	8.25037	1426	8.25037	1381
	8.26708	1292	8.26708	1376	8.26708	1290	8.26708	1257	8.26708	1522	8.26708	1455	8.26708	1340
	8.28379	1349	8.28379	1379	8.28379	1291	8.28379	1276	8.28379	1454	8.28379	1549	8.28379	1482
	8.3005	1358	8.3005	1366	8.3005	1258	8.3005	1308	8.3005	1404	8.3005	1325	8.3005	1360
	8.31722	1360	8.31722	1427	8.31722	1336	8.31722	1317	8.31722	1467	8.31722	1459	8.31722	1375
	8.33393	1333	8.33393	1344	8.33393	1294	8.33393	1327	8.33393	1596	8.33393	1426	8.33393	1371
	8.35064	1350	8.35064	1409	8.35064	1267	8.35064	1343	8.35064	1523	8.35064	1435	8.35064	1339
	8.36735	1344	8.36735	1376	8.36735	1280	8.36735	1264	8.36735	1487	8.36735	1464	8.36735	1385
	8.38406	1298	8.38406	1333	8.38406	1244	8.38406	1315	8.38406	1512	8.38406	1438	8.38406	1360
	8.40077	1336	8.40077	1285	8.40077	1253	8.40077	1285	8.40077	1483	8.40077	1453	8.40077	1341
	8.41748	1317	8.41748	1326	8.41748	1346	8.41748	1266	8.41748	1451	8.41748	1393	8.41748	1390
	8.43419	1404	8.43419	1373	8.43419	1307	8.43419	1317	8.43419	1499	8.43419	1427	8.43419	1376
	8.45091	1370	8.45091	1385	8.45091	1218	8.45091	1311	8.45091	1457	8.45091	1433	8.45091	1337
	8.46762	1310	8.46762	1377	8.46762	1281	8.46762	1292	8.46762	1492	8.46762	1457	8.46762	1423
	8.48433	1298	8.48433	1390	8.48433	1330	8.48433	1258	8.48433	1502	8.48433	1411	8.48433	1340
	8.50104	1368	8.50104	1378	8.50104	1297	8.50104	1271	8.50104	1516	8.50104	1322	8.50104	1316
	8.51775	1302	8.51775	1264	8.51775	1349	8.51775	1221	8.51775	1426	8.51775	1429	8.51775	1378
	8.53446	1408	8.53446	1360	8.53446	1222	8.53446	1222	8.53446	1431	8.53446	1487	8.53446	1365
	8.55117	1284	8.55117	1324	8.55117	1305	8.55117	1299	8.55117	1468	8.55117	1338	8.55117	1373
	8.56788	1323	8.56788	1341	8.56788	1254	8.56788	1274	8.56788	1425	8.56788	1368	8.56788	1348
	8.5846	1249	8.5846	1330	8.5846	1226	8.5846	1245	8.5846	1479	8.5846	1384	8.5846	1387
	8.60131	1382	8.60131	1314	8.60131	1278	8.60131	1264	8.60131	1416	8.60131	1406	8.60131	1331
	8.61802	1257	8.61802	1338	8.61802	1322	8.61802	1299	8.61802	1475	8.61802	1363	8.61802	1368
	8.63473	1270	8.63473	1346	8.63473	1261	8.63473	1263	8.63473	1493	8.63473	1424	8.63473	1354
	8.65144	1355	8.65144	1374	8.65144	1285	8.65144	1318	8.65144	1496	8.65144	1350	8.65144	1392
	8.66815	1298	8.66815	1298	8.66815	1270	8.66815	1222	8.66815	1495	8.66815	1374	8.66815	1331
	8.68486	1315	8.68486	1352	8.68486	1349	8.68486	1276	8.68486	1443	8.68486	1421	8.68486	1295
	8.70157	1316	8.70157	1282	8.70157	1324	8.70157	1250	8.70157	1400	8.70157	1328	8.70157	1342
	8.71829	1333	8.71829	1321	8.71829	1259	8.71829	1234	8.71829	1412	8.71829	1375	8.71829	1433
	8.735	1293	8.735	1333	8.735	1198	8.735	1269	8.735	1502	8.735	1370	8.735	1368
	8.75171	1384	8.75171	1283	8.75171	1275	8.75171	1227	8.75171	1440	8.75171	1416	8.75171	1347
	8.76842	1310	8.76842	1327	8.76842	1259	8.76842	1273	8.76842	1441	8.76842	1400	8.76842	1338
	8.78513	1336	8.78513	1242	8.78513	1299	8.78513	1246	8.78513	1457	8.78513	1302	8.78513	1327
	8.80184	1320	8.80184	1296	8.80184	1298	8.80184	1270	8.80184	1456	8.80184	1380	8.80184	1338
	8.81855	1285	8.81855	1300	8.81855	1259	8.81855	1221	8.81855	1462	8.81855	1385	8.81855	1327
	8.83527	1346	8.83527	1308	8.83527	1237	8.83527	1254	8.83527	1382	8.83527	1313	8.83527	1299
	8.85198	1241	8.85198	1315	8.85198	1213	8.85198	1246	8.85198	1421	8.85198	1373	8.85198	1328
	8.86869	1214	8.86869	1290	8.86869	1294	8.86869	1212	8.86869	1422	8.86869	1435	8.86869	1318
	8.8854	1250	8.8854	1228	8.8854	1241	8.8854	1200	8.8854	1383	8.8854	1410	8.8854	1267
	8.90211	1289	8.90211	1292	8.90211	1219	8.90211	1233	8.90211	1443	8.90211	1364	8.90211	1285
	8.91882	1266	8.91882	1276	8.91882	1305	8.91882	1199	8.91882	1427	8.91882	1424	8.91882	1318
	8.93553	1267	8.93553	1272	8.93553	1280	8.93553	1172	8.93553	1476	8.93553	1340	8.93553	1347
	8.95224	1319	8.95224	1316	8.95224	1199	8.95224	1220	8.95224	1505	8.95224	1296	8.95224	1330
	8.96896	1292	8.96896	1339	8.96896	1297	8.96896	1283	8.96896	1376	8.96896	1271	8.96896	1295
	8.98567	1309	8.98567	1282	8.98567	1216	8.98567	1271	8.98567	1423	8.98567	1300	8.98567	1278
	9.00238	1285	9.00238	1288	9.00238	1217	9.00238	1253	9.00238	1471	9.00238	1353	9.00238	1327
	9.01909	1275	9.01909	1263	9.01909	1251	9.01909	1278	9.01909	1400	9.01909	1305	9.01909	1314
	9.0358	1363	9.0358	1218	9.0358	1233	9.0358	1238	9.0358	1387	9.0358	1412	9.0358	1350
	9.05251	1292	9.05251	1284	9.05251	1263	9.05251	1229	9.05251	1474	9.05251	1427	9.05251	1288
	9.06922	1242	9.06922	1257	9.06922	1232	9.06922	1173	9.06922	1411	9.06922	1391	9.06922	1323
	9.08593	1206	9.08593	1222	9.08593	1224	9.08593	1237	9.08593	1430	9.08593	1309	9.08593	1325
	9.10265	1276	9.10265	1319	9.10265	1266	9.10265	1245	9.10265	1392	9.10265	1313	9.10265	1208
	9.11936	1229	9.11936	1208	9.11936	1230	9.11936	1241	9.11936	1420	9.11936	1362	9.11936	1324
	9.13607	1304	9.13607	1280	9.13607	1214	9.13607	1239	9.13607	1380	9.13607	1283	9.13607	1272
	9.15278	1212	9.15278	1238	9.15278	1265	9.15278	1236	9.15278	1401	9.15278	1409	9.15278	1333
	9.16949	1189	9.16949	1320	9.16949	1207	9.16949	1183	9.16949	1366	9.16949	1340	9.16949	1281
	9.1862	1253	9.1862	1325	9.1862	1198	9.1862	1147	9.1862	1392	9.1862	1352	9.1862	1256
	9.20291	1307	9.20291	1327	9.20291	1247	9.20291	1201	9.20291	1395	9.20291	1364	9.20291	1287
	9.21962	1260	9.21962	1213	9.21962	1217	9.21962	1259	9.21962	1425	9.21962	1282	9.21962	1245
	9.23634	1290	9.23634	1209	9.23634	1215	9.23634	1219	9.23634	1405	9.23634	1342	9.23634	1229
	9.25305	1200	9.25305	1257	9.25305	1237	9.25305	1153	9.25305	1365	9.25305	1310	9.25305	1308
	9.26976	1231	9.26976	1293	9.26976	1175	9.26976	1208	9.26976	1416	9.26976	1293	9.26976	1214
	9.28647	1265	9.28647	1312	9.28647	1224	9.28647	1234	9.28647	1411	9.28647	1314	9.28647	1294
	9.30318	1239	9.30318	1219	9.30318	1172	9.30318	1240	9.30318	1373	9.30318	1373	9.30318	1267
	9.31989	1191	9.31989	1237	9.31989	1164	9.31989	1251	9.31989	1307	9.31989	1240	9.31989	1254
	9.3366	1195	9.3366	1299	9.3366	1230	9.3366	1207	9.3366	1339	9.3366	1262	9.3366	1198
	9.35331	1250	9.35331	1266	9.35331	1181	9.35331	1169	9.35331	1314	9.35331	1302	9.35331	1258
	9.37003	1281	9.37003	1272	9.37003	1201	9.37003	1147	9.37003	1381	9.37003	1322	9.37003	1216
	9.38674	1220	9.38674	1260	9.38674	1209	9.38674	1173	9.38674	1353	9.38674	1297	9.38674	1261
	9.40345	1196	9.40345	1209	9.40345	1186	9.40345	1147	9.40345	1350	9.40345	1268	9.40345	1272
	9.42016	1161	9.42016	1227	9.42016	1277	9.42016	1238	9.42016	1352	9.42016	1315	9.42016	1268
	9.43687	1210	9.43687	1247	9.43687	1218	9.43687	1211	9.43687	1403	9.43687	1309	9.43687	1310
	9.45358	1221	9.45358	1290	9.45358	1180	9.45358	1189	9.45358	1355	9.45358	1317	9.45358	1248
	9.47029	1228	9.47029	1226	9.47029	1222	9.47029	1195	9.47029	1348	9.47029	1315	9.47029	1228
	9.487	1173	9.487	1260	9.487	1160	9.487	1241	9.487	1376	9.487	1296	9.487	1194
	9.50372	1253	9.50372	1146	9.50372	1120	9.50372	1181	9.50372	1281	9.50372	1283	9.50372	1273
	9.52043	1206	9.52043	1246	9.52043	1205	9.52043	1219	9.52043	1369	9.52043	1351	9.52043	1234
	9.53714	1229	9.53714	1246	9.53714	1174	9.53714	1245	9.53714	1292	9.53714	1242	9.53714	1212
	9.55385	1226	9.55385	1250	9.55385	1171	9.55385	1171	9.55385	1321	9.55385	1287	9.55385	1210
	9.57056	1164	9.57056	1245	9.57056	1200	9.57056	1168	9.57056	1320	9.57056	1243	9.57056	1282
	9.58727	1238	9.58727	1247	9.58727	1101	9.58727	1206	9.58727	1380	9.58727	1287	9.58727	1200
	9.60398	1162	9.60398	1234	9.60398	1166	9.60398	1113	9.60398	1331	9.60398	1273	9.60398	1217
	9.62069	1270	9.62069	1304	9.62069	1158	9.62069	1118	9.62069	1338	9.62069	1290	9.62069	1240
	9.63741	1188	9.63741	1254	9.63741	1175	9.63741	1172	9.63741	1304	9.63741	1250	9.63741	1214
	9.65412	1171	9.65412	1269	9.65412	1135	9.65412	1087	9.65412	1392	9.65412	1211	9.65412	1214
	9.67083	1254	9.67083	1240	9.67083	1136	9.67083	1157	9.67083	1282	9.67083	1277	9.67083	1218
	9.68754	1157	9.68754	1276	9.68754	1110	9.68754	1114	9.68754	1355	9.68754	1310	9.68754	1258
	9.70425	1247	9.70425	1244	9.70425	1160	9.70425	1203	9.70425	1305	9.70425	1280	9.70425	1267
	9.72096	1215	9.72096	1228	9.72096	1139	9.72096	1203	9.72096	1309	9.72096	1299	9.72096	1180
	9.73767	1181	9.73767	1268	9.73767	1214	9.73767	1239	9.73767	1318	9.73767	1310	9.73767	1185
	9.75438	1196	9.75438	1259	9.75438	1173	9.75438	1198	9.75438	1232	9.75438	1259	9.75438	1160
	9.7711	1171	9.7711	1191	9.7711	1159	9.7711	1157	9.7711	1323	9.7711	1238	9.7711	1174
	9.78781	1187	9.78781	1209	9.78781	1169	9.78781	1142	9.78781	1328	9.78781	1231	9.78781	1208
	9.80452	1199	9.80452	1308	9.80452	1152	9.80452	1115	9.80452	1356	9.80452	1198	9.80452	1172
	9.82123	1166	9.82123	1275	9.82123	1127	9.82123	1190	9.82123	1284	9.82123	1319	9.82123	1195
	9.83794	1131	9.83794	1265	9.83794	1198	9.83794	1144	9.83794	1303	9.83794	1230	9.83794	1261
	9.85465	1211	9.85465	1297	9.85465	1110	9.85465	1206	9.85465	1310	9.85465	1210	9.85465	1226
	9.87136	1166	9.87136	1226	9.87136	1179	9.87136	1176	9.87136	1247	9.87136	1300	9.87136	1203
	9.88808	1156	9.88808	1271	9.88808	1187	9.88808	1121	9.88808	1292	9.88808	1251	9.88808	1209
	9.90479	1183	9.90479	1217	9.90479	1113	9.90479	1103	9.90479	1312	9.90479	1318	9.90479	1231
	9.9215	1160	9.9215	1232	9.9215	1133	9.9215	1136	9.9215	1270	9.9215	1238	9.9215	1186
	9.93821	1137	9.93821	1257	9.93821	1162	9.93821	1113	9.93821	1264	9.93821	1243	9.93821	1189
	9.95492	1182	9.95492	1271	9.95492	1113	9.95492	1184	9.95492	1256	9.95492	1231	9.95492	1132
	9.97163	1155	9.97163	1325	9.97163	1148	9.97163	1105	9.97163	1253	9.97163	1237	9.97163	1153
	9.98834	1169	9.98834	1273	9.98834	1121	9.98834	1091	9.98834	1251	9.98834	1205	9.98834	1209
	10.0051	1179	10.0051	1276	10.0051	1184	10.0051	1181	10.0051	1278	10.0051	1245	10.0051	1158
	10.0218	1162	10.0218	1398	10.0218	1102	10.0218	1125	10.0218	1236	10.0218	1259	10.0218	1167
	10.0385	1147	10.0385	1370	10.0385	1171	10.0385	1210	10.0385	1254	10.0385	1273	10.0385	1248
	10.0552	1154	10.0552	1402	10.0552	1183	10.0552	1059	10.0552	1310	10.0552	1305	10.0552	1177
	10.0719	1198	10.0719	1372	10.0719	1167	10.0719	1132	10.0719	1267	10.0719	1214	10.0719	1193
	10.0886	1129	10.0886	1427	10.0886	1152	10.0886	1142	10.0886	1332	10.0886	1243	10.0886	1172
	10.1053	1121	10.1053	1390	10.1053	1169	10.1053	1159	10.1053	1358	10.1053	1223	10.1053	1181
	10.122	1171	10.122	1389	10.122	1129	10.122	1110	10.122	1239	10.122	1186	10.122	1169
	10.1387	1125	10.1387	1354	10.1387	1134	10.1387	1147	10.1387	1238	10.1387	1233	10.1387	1178
	10.1555	1110	10.1555	1407	10.1555	1135	10.1555	1114	10.1555	1289	10.1555	1205	10.1555	1174
	10.1722	1124	10.1722	1459	10.1722	1100	10.1722	1175	10.1722	1268	10.1722	1271	10.1722	1180
	10.1889	1135	10.1889	1337	10.1889	1096	10.1889	1069	10.1889	1245	10.1889	1188	10.1889	1146
	10.2056	1179	10.2056	1406	10.2056	1142	10.2056	1132	10.2056	1271	10.2056	1220	10.2056	1138
	10.2223	1138	10.2223	1339	10.2223	1123	10.2223	1105	10.2223	1245	10.2223	1199	10.2223	1162
	10.239	1162	10.239	1287	10.239	1149	10.239	1101	10.239	1232	10.239	1223	10.239	1221
	10.2557	1163	10.2557	1273	10.2557	1129	10.2557	1085	10.2557	1232	10.2557	1218	10.2557	1210
	10.2724	1137	10.2724	1244	10.2724	1105	10.2724	1129	10.2724	1297	10.2724	1164	10.2724	1106
	10.2891	1125	10.2891	1142	10.2891	1150	10.2891	1018	10.2891	1314	10.2891	1210	10.2891	1175
	10.3059	1110	10.3059	1221	10.3059	1032	10.3059	1068	10.3059	1304	10.3059	1181	10.3059	1158
	10.3226	1139	10.3226	1199	10.3226	1094	10.3226	1146	10.3226	1300	10.3226	1148	10.3226	1162
	10.3393	1158	10.3393	1253	10.3393	1105	10.3393	1120	10.3393	1207	10.3393	1255	10.3393	1162
	10.356	1128	10.356	1135	10.356	1096	10.356	1050	10.356	1319	10.356	1259	10.356	1103
	10.3727	1097	10.3727	1179	10.3727	1134	10.3727	1124	10.3727	1332	10.3727	1201	10.3727	1157
	10.3894	1101	10.3894	1140	10.3894	1084	10.3894	1102	10.3894	1254	10.3894	1123	10.3894	1126
	10.4061	1118	10.4061	1209	10.4061	1072	10.4061	1100	10.4061	1294	10.4061	1233	10.4061	1150
	10.4228	1158	10.4228	1154	10.4228	1057	10.4228	1172	10.4228	1200	10.4228	1195	10.4228	1099
	10.4396	1138	10.4396	1174	10.4396	1126	10.4396	1036	10.4396	1226	10.4396	1237	10.4396	1173
	10.4563	1189	10.4563	1146	10.4563	1042	10.4563	1080	10.4563	1219	10.4563	1240	10.4563	1136
	10.473	1149	10.473	1112	10.473	1075	10.473	1004	10.473	1209	10.473	1155	10.473	1102
	10.4897	1087	10.4897	1159	10.4897	1108	10.4897	1136	10.4897	1255	10.4897	1172	10.4897	1138
	10.5064	1141	10.5064	1154	10.5064	1078	10.5064	1075	10.5064	1242	10.5064	1188	10.5064	1063
	10.5231	1138	10.5231	1152	10.5231	1114	10.5231	1060	10.5231	1227	10.5231	1137	10.5231	1121
	10.5398	1072	10.5398	1122	10.5398	1108	10.5398	1056	10.5398	1222	10.5398	1178	10.5398	1131
	10.5565	1113	10.5565	1148	10.5565	1067	10.5565	1107	10.5565	1219	10.5565	1196	10.5565	1156
	10.5732	1080	10.5732	1108	10.5732	1079	10.5732	1040	10.5732	1235	10.5732	1259	10.5732	1177
	10.5899	1166	10.5899	1122	10.5899	1031	10.5899	1077	10.5899	1231	10.5899	1155	10.5899	1100
	10.6067	1098	10.6067	1111	10.6067	1132	10.6067	1063	10.6067	1255	10.6067	1222	10.6067	1104
	10.6234	1132	10.6234	1156	10.6234	1060	10.6234	1111	10.6234	1167	10.6234	1178	10.6234	1177
	10.6401	1095	10.6401	1133	10.6401	1098	10.6401	1098	10.6401	1277	10.6401	1199	10.6401	1088
	10.6568	1085	10.6568	1151	10.6568	1048	10.6568	968	10.6568	1187	10.6568	1200	10.6568	1149
	10.6735	1149	10.6735	1138	10.6735	1021	10.6735	1011	10.6735	1210	10.6735	1196	10.6735	1124
	10.6902	1119	10.6902	1145	10.6902	1081	10.6902	1001	10.6902	1300	10.6902	1196	10.6902	1065
	10.7069	1120	10.7069	1146	10.7069	1066	10.7069	1078	10.7069	1175	10.7069	1220	10.7069	1123
	10.7236	1091	10.7236	1085	10.7236	1147	10.7236	1077	10.7236	1211	10.7236	1253	10.7236	1090
	10.7403	1092	10.7403	1073	10.7403	1088	10.7403	1045	10.7403	1263	10.7403	1179	10.7403	1168
	10.7571	1084	10.7571	1063	10.7571	1041	10.7571	1098	10.7571	1233	10.7571	1287	10.7571	1119
	10.7738	1117	10.7738	1138	10.7738	1097	10.7738	1036	10.7738	1150	10.7738	1217	10.7738	1156
	10.7905	1086	10.7905	1103	10.7905	1021	10.7905	1054	10.7905	1274	10.7905	1199	10.7905	1119
	10.8072	1092	10.8072	1127	10.8072	1096	10.8072	1078	10.8072	1135	10.8072	1253	10.8072	1069
	10.8239	1120	10.8239	1137	10.8239	1013	10.8239	1041	10.8239	1160	10.8239	1295	10.8239	1107
	10.8406	1066	10.8406	1048	10.8406	1060	10.8406	1118	10.8406	1254	10.8406	1210	10.8406	1148
	10.8573	1092	10.8573	1064	10.8573	1047	10.8573	1073	10.8573	1213	10.8573	1222	10.8573	1169
	10.874	1169	10.874	1175	10.874	1074	10.874	1042	10.874	1201	10.874	1241	10.874	1093
	10.8908	1125	10.8908	1146	10.8908	1103	10.8908	1016	10.8908	1229	10.8908	1293	10.8908	1134
	10.9075	1091	10.9075	1113	10.9075	1055	10.9075	1077	10.9075	1203	10.9075	1292	10.9075	1076
	10.9242	1139	10.9242	1081	10.9242	1030	10.9242	1059	10.9242	1250	10.9242	1301	10.9242	1108
	10.9409	1067	10.9409	1125	10.9409	1049	10.9409	1086	10.9409	1171	10.9409	1276	10.9409	1105
	10.9576	1100	10.9576	1141	10.9576	1036	10.9576	1073	10.9576	1208	10.9576	1274	10.9576	1088
	10.9743	1160	10.9743	1091	10.9743	1010	10.9743	1001	10.9743	1173	10.9743	1301	10.9743	1079
	10.991	1111	10.991	1172	10.991	1054	10.991	1055	10.991	1157	10.991	1251	10.991	1078
	11.0077	1121	11.0077	1173	11.0077	1090	11.0077	1096	11.0077	1234	11.0077	1200	11.0077	1073
	11.0244	1081	11.0244	1175	11.0244	1053	11.0244	1013	11.0244	1256	11.0244	1181	11.0244	1133
	11.0412	1163	11.0412	1162	11.0412	1071	11.0412	1044	11.0412	1162	11.0412	1205	11.0412	1081
	11.0579	1097	11.0579	1141	11.0579	1077	11.0579	1055	11.0579	1184	11.0579	1233	11.0579	1113
	11.0746	1076	11.0746	1162	11.0746	969	11.0746	1028	11.0746	1206	11.0746	1230	11.0746	1067
	11.0913	1096	11.0913	1096	11.0913	1044	11.0913	1011	11.0913	1207	11.0913	1182	11.0913	1099
	11.108	1090	11.108	1123	11.108	1004	11.108	1009	11.108	1173	11.108	1177	11.108	1115
	11.1247	1080	11.1247	1134	11.1247	1049	11.1247	1020	11.1247	1167	11.1247	1184	11.1247	1044
	11.1414	1114	11.1414	1118	11.1414	1062	11.1414	992	11.1414	1244	11.1414	1165	11.1414	1088
	11.1581	1083	11.1581	1101	11.1581	1065	11.1581	1052	11.1581	1177	11.1581	1160	11.1581	1055
	11.1748	1055	11.1748	1175	11.1748	1039	11.1748	1060	11.1748	1243	11.1748	1146	11.1748	1153
	11.1915	1050	11.1915	1140	11.1915	1015	11.1915	1018	11.1915	1181	11.1915	1123	11.1915	1073
	11.2083	1135	11.2083	1149	11.2083	1086	11.2083	998	11.2083	1167	11.2083	1095	11.2083	1072
	11.225	1047	11.225	1248	11.225	1004	11.225	1050	11.225	1206	11.225	1090	11.225	976
	11.2417	1045	11.2417	1255	11.2417	1019	11.2417	1020	11.2417	1185	11.2417	1118	11.2417	1088
	11.2584	1092	11.2584	1219	11.2584	986	11.2584	1016	11.2584	1193	11.2584	1169	11.2584	1044
	11.2751	1030	11.2751	1373	11.2751	970	11.2751	993	11.2751	1208	11.2751	1190	11.2751	1084
	11.2918	1036	11.2918	1382	11.2918	1003	11.2918	995	11.2918	1182	11.2918	1121	11.2918	1107
	11.3085	1114	11.3085	1576	11.3085	1030	11.3085	998	11.3085	1186	11.3085	1087	11.3085	1101
	11.3252	1080	11.3252	1727	11.3252	1077	11.3252	1031	11.3252	1145	11.3252	1133	11.3252	1090
	11.342	1102	11.342	1800	11.342	1024	11.342	1109	11.342	1160	11.342	1107	11.342	1094
	11.3587	1120	11.3587	1703	11.3587	1038	11.3587	1026	11.3587	1146	11.3587	1179	11.3587	1023
	11.3754	1141	11.3754	1547	11.3754	1063	11.3754	1039	11.3754	1146	11.3754	1098	11.3754	1055
	11.3921	1139	11.3921	1304	11.3921	970	11.3921	1063	11.3921	1187	11.3921	1126	11.3921	1052
	11.4088	1101	11.4088	1226	11.4088	1019	11.4088	1012	11.4088	1149	11.4088	1142	11.4088	1100
	11.4255	1158	11.4255	1145	11.4255	1084	11.4255	1083	11.4255	1138	11.4255	1103	11.4255	1050
	11.4422	1069	11.4422	1114	11.4422	1035	11.4422	992	11.4422	1179	11.4422	1161	11.4422	1041
	11.4589	1109	11.4589	1075	11.4589	1006	11.4589	948	11.4589	1168	11.4589	1164	11.4589	1064
	11.4756	1087	11.4756	1043	11.4756	1030	11.4756	1022	11.4756	1108	11.4756	1122	11.4756	1093
	11.4924	1020	11.4924	1130	11.4924	1021	11.4924	1030	11.4924	1138	11.4924	1168	11.4924	1094
	11.5091	1024	11.5091	1067	11.5091	1054	11.5091	1048	11.5091	1146	11.5091	1069	11.5091	1044
	11.5258	1039	11.5258	1056	11.5258	941	11.5258	987	11.5258	1136	11.5258	1112	11.5258	1054
	11.5425	1020	11.5425	1041	11.5425	990	11.5425	1055	11.5425	1190	11.5425	1108	11.5425	1072
	11.5592	1044	11.5592	1032	11.5592	992	11.5592	1030	11.5592	1130	11.5592	1067	11.5592	1047
	11.5759	999	11.5759	1043	11.5759	1020	11.5759	1002	11.5759	1196	11.5759	1109	11.5759	1077
	11.5926	989	11.5926	1051	11.5926	1073	11.5926	1026	11.5926	1185	11.5926	1080	11.5926	1018
	11.6093	1057	11.6093	988	11.6093	1029	11.6093	998	11.6093	1173	11.6093	1081	11.6093	1047
	11.626	1040	11.626	1095	11.626	1045	11.626	978	11.626	1108	11.626	1067	11.626	1060
	11.6428	1063	11.6428	1087	11.6428	1027	11.6428	956	11.6428	1141	11.6428	1117	11.6428	1036
	11.6595	1060	11.6595	1082	11.6595	1059	11.6595	981	11.6595	1148	11.6595	1093	11.6595	1087
	11.6762	1059	11.6762	1020	11.6762	1008	11.6762	1009	11.6762	1185	11.6762	1088	11.6762	1046
	11.6929	1020	11.6929	1137	11.6929	990	11.6929	1005	11.6929	1138	11.6929	1138	11.6929	1107
	11.7096	1028	11.7096	1149	11.7096	1035	11.7096	975	11.7096	1126	11.7096	1085	11.7096	1013
	11.7263	1063	11.7263	1168	11.7263	992	11.7263	1011	11.7263	1145	11.7263	1088	11.7263	1008
	11.743	1057	11.743	1188	11.743	990	11.743	951	11.743	1117	11.743	1122	11.743	1087
	11.7597	1015	11.7597	1194	11.7597	981	11.7597	1009	11.7597	1119	11.7597	1125	11.7597	1050
	11.7765	1033	11.7765	1230	11.7765	985	11.7765	968	11.7765	1157	11.7765	1058	11.7765	1043
	11.7932	1054	11.7932	1218	11.7932	976	11.7932	1006	11.7932	1125	11.7932	1067	11.7932	1042
	11.8099	1057	11.8099	1331	11.8099	1011	11.8099	1009	11.8099	1144	11.8099	1126	11.8099	1046
	11.8266	1066	11.8266	1293	11.8266	965	11.8266	933	11.8266	1104	11.8266	1137	11.8266	1048
	11.8433	1049	11.8433	1403	11.8433	970	11.8433	948	11.8433	1162	11.8433	1063	11.8433	1041
	11.86	992	11.86	1416	11.86	1019	11.86	975	11.86	1129	11.86	1062	11.86	1080
	11.8767	988	11.8767	1520	11.8767	968	11.8767	967	11.8767	1205	11.8767	1069	11.8767	1047
	11.8934	1019	11.8934	1492	11.8934	981	11.8934	1038	11.8934	1156	11.8934	1155	11.8934	1085
	11.9101	1017	11.9101	1638	11.9101	1015	11.9101	982	11.9101	1108	11.9101	1084	11.9101	997
	11.9268	1065	11.9268	1761	11.9268	1035	11.9268	970	11.9268	1164	11.9268	1118	11.9268	1003
	11.9436	1015	11.9436	1832	11.9436	996	11.9436	1001	11.9436	1083	11.9436	1059	11.9436	1026
	11.9603	1000	11.9603	1989	11.9603	1015	11.9603	954	11.9603	1098	11.9603	1060	11.9603	1043
	11.977	1096	11.977	2143	11.977	977	11.977	981	11.977	1175	11.977	1097	11.977	1028
	11.9937	1046	11.9937	2312	11.9937	990	11.9937	1000	11.9937	1156	11.9937	1104	11.9937	995
	12.0104	1115	12.0104	2439	12.0104	915	12.0104	1011	12.0104	1075	12.0104	1085	12.0104	1073
	12.0271	1012	12.0271	2857	12.0271	979	12.0271	969	12.0271	1159	12.0271	1103	12.0271	1016
	12.0438	1125	12.0438	3188	12.0438	996	12.0438	936	12.0438	1110	12.0438	1100	12.0438	989
	12.0605	1049	12.0605	3688	12.0605	981	12.0605	945	12.0605	1188	12.0605	1146	12.0605	1023
	12.0772	1101	12.0772	4311	12.0772	966	12.0772	961	12.0772	1099	12.0772	1127	12.0772	1012
	12.094	1148	12.094	5117	12.094	1033	12.094	932	12.094	1141	12.094	1142	12.094	1051
	12.1107	1160	12.1107	6135	12.1107	991	12.1107	975	12.1107	1092	12.1107	1096	12.1107	981
	12.1274	1187	12.1274	7733	12.1274	1022	12.1274	924	12.1274	1147	12.1274	1142	12.1274	1038
	12.1441	1183	12.1441	9808	12.1441	1000	12.1441	975	12.1441	1152	12.1441	1042	12.1441	1037
	12.1608	1173	12.1608	12301	12.1608	958	12.1608	997	12.1608	1114	12.1608	1107	12.1608	1074
	12.1775	1231	12.1775	12666	12.1775	1012	12.1775	865	12.1775	1111	12.1775	1179	12.1775	1043
	12.1942	1380	12.1942	11224	12.1942	966	12.1942	935	12.1942	1173	12.1942	1129	12.1942	1009
	12.2109	1341	12.2109	8840	12.2109	938	12.2109	959	12.2109	1120	12.2109	1169	12.2109	1072
	12.2277	1338	12.2277	6858	12.2277	988	12.2277	999	12.2277	1160	12.2277	1123	12.2277	1057
	12.2444	1275	12.2444	5086	12.2444	973	12.2444	910	12.2444	1077	12.2444	1137	12.2444	1008
	12.2611	1172	12.2611	3518	12.2611	967	12.2611	917	12.2611	1134	12.2611	1040	12.2611	1049
	12.2778	1074	12.2778	2472	12.2778	975	12.2778	965	12.2778	1192	12.2778	1080	12.2778	1069
	12.2945	1018	12.2945	1831	12.2945	939	12.2945	930	12.2945	1110	12.2945	1053	12.2945	1024
	12.3112	1001	12.3112	1630	12.3112	954	12.3112	995	12.3112	1110	12.3112	1119	12.3112	1071
	12.3279	1099	12.3279	1495	12.3279	992	12.3279	982	12.3279	1094	12.3279	1023	12.3279	1054
	12.3446	1037	12.3446	1428	12.3446	941	12.3446	970	12.3446	1141	12.3446	1084	12.3446	1012
	12.3613	1055	12.3613	1432	12.3613	957	12.3613	987	12.3613	1175	12.3613	1093	12.3613	1046
	12.378	909	12.378	1438	12.378	963	12.378	928	12.378	1182	12.378	1086	12.378	1072
	12.3948	1021	12.3948	1313	12.3948	902	12.3948	969	12.3948	1166	12.3948	1070	12.3948	1054
	12.4115	1056	12.4115	1235	12.4115	956	12.4115	896	12.4115	1172	12.4115	1064	12.4115	1101
	12.4282	1011	12.4282	1223	12.4282	985	12.4282	951	12.4282	1128	12.4282	1080	12.4282	1006
	12.4449	1032	12.4449	1156	12.4449	951	12.4449	913	12.4449	1125	12.4449	1028	12.4449	1064
	12.4616	1004	12.4616	1094	12.4616	909	12.4616	973	12.4616	1119	12.4616	1099	12.4616	976
	12.4783	986	12.4783	1102	12.4783	1011	12.4783	986	12.4783	1138	12.4783	1121	12.4783	1078
	12.495	990	12.495	1073	12.495	907	12.495	946	12.495	1147	12.495	1063	12.495	1056
	12.5117	983	12.5117	1069	12.5117	994	12.5117	908	12.5117	1090	12.5117	1051	12.5117	1009
	12.5285	945	12.5285	1012	12.5285	921	12.5285	972	12.5285	1180	12.5285	1032	12.5285	1046
	12.5452	963	12.5452	1036	12.5452	988	12.5452	891	12.5452	1134	12.5452	1108	12.5452	1068
	12.5619	1000	12.5619	1067	12.5619	963	12.5619	928	12.5619	1120	12.5619	1031	12.5619	978
	12.5786	941	12.5786	1037	12.5786	958	12.5786	1000	12.5786	1187	12.5786	1135	12.5786	1013
	12.5953	987	12.5953	1006	12.5953	921	12.5953	966	12.5953	1064	12.5953	1087	12.5953	1012
	12.612	1016	12.612	1062	12.612	960	12.612	958	12.612	1154	12.612	1136	12.612	1047
	12.6287	1015	12.6287	1045	12.6287	965	12.6287	949	12.6287	1209	12.6287	1075	12.6287	1094
	12.6454	1018	12.6454	1004	12.6454	964	12.6454	955	12.6454	1104	12.6454	1072	12.6454	1048
	12.6622	1012	12.6622	990	12.6622	948	12.6622	1024	12.6622	1199	12.6622	1052	12.6622	1052
	12.6789	1018	12.6789	969	12.6789	956	12.6789	1024	12.6789	1109	12.6789	1036	12.6789	1028
	12.6956	983	12.6956	1040	12.6956	923	12.6956	957	12.6956	1217	12.6956	1070	12.6956	1006
	12.7123	986	12.7123	992	12.7123	953	12.7123	988	12.7123	1201	12.7123	1155	12.7123	1101
	12.729	1015	12.729	1013	12.729	956	12.729	992	12.729	1208	12.729	1112	12.729	1041
	12.7457	999	12.7457	1017	12.7457	956	12.7457	933	12.7457	1113	12.7457	1131	12.7457	1052
	12.7624	978	12.7624	991	12.7624	951	12.7624	991	12.7624	1223	12.7624	1097	12.7624	1123
	12.7791	987	12.7791	1022	12.7791	976	12.7791	954	12.7791	1145	12.7791	1084	12.7791	1073
	12.7958	1008	12.7958	1065	12.7958	1022	12.7958	965	12.7958	1216	12.7958	1134	12.7958	1050
	12.8125	950	12.8125	1005	12.8125	1065	12.8125	1078	12.8125	1168	12.8125	1094	12.8125	1059
	12.8293	981	12.8293	1012	12.8293	975	12.8293	1010	12.8293	1130	12.8293	1112	12.8293	1032
	12.846	1010	12.846	877	12.846	1020	12.846	978	12.846	1208	12.846	1115	12.846	999
	12.8627	943	12.8627	1047	12.8627	971	12.8627	983	12.8627	1192	12.8627	1045	12.8627	1078
	12.8794	978	12.8794	997	12.8794	916	12.8794	907	12.8794	1237	12.8794	1067	12.8794	1094
	12.8961	988	12.8961	1023	12.8961	992	12.8961	943	12.8961	1194	12.8961	1076	12.8961	1094
	12.9128	954	12.9128	978	12.9128	981	12.9128	1018	12.9128	1151	12.9128	1107	12.9128	1058
	12.9295	1017	12.9295	988	12.9295	893	12.9295	920	12.9295	1198	12.9295	1139	12.9295	1060
	12.9462	1000	12.9462	998	12.9462	941	12.9462	868	12.9462	1298	12.9462	1101	12.9462	1054
	12.9629	992	12.9629	937	12.9629	1017	12.9629	941	12.9629	1192	12.9629	1140	12.9629	1107
	12.9797	1031	12.9797	1018	12.9797	947	12.9797	884	12.9797	1191	12.9797	1178	12.9797	1109
	12.9964	960	12.9964	976	12.9964	903	12.9964	941	12.9964	1262	12.9964	1102	12.9964	1032
	13.0131	999	13.0131	981	13.0131	971	13.0131	929	13.0131	1211	13.0131	1077	13.0131	1140
	13.0298	962	13.0298	1040	13.0298	949	13.0298	1000	13.0298	1260	13.0298	1070	13.0298	1070
	13.0465	1011	13.0465	955	13.0465	990	13.0465	953	13.0465	1245	13.0465	1106	13.0465	1072
	13.0632	928	13.0632	950	13.0632	946	13.0632	883	13.0632	1243	13.0632	1100	13.0632	1006
	13.0799	1002	13.0799	1023	13.0799	914	13.0799	893	13.0799	1290	13.0799	1093	13.0799	1134
	13.0966	999	13.0966	948	13.0966	948	13.0966	958	13.0966	1250	13.0966	1123	13.0966	1091
	13.1134	1006	13.1134	995	13.1134	913	13.1134	918	13.1134	1329	13.1134	1073	13.1134	1110
	13.1301	955	13.1301	1019	13.1301	904	13.1301	900	13.1301	1282	13.1301	1168	13.1301	1101
	13.1468	971	13.1468	955	13.1468	956	13.1468	876	13.1468	1283	13.1468	1074	13.1468	1112
	13.1635	955	13.1635	997	13.1635	903	13.1635	956	13.1635	1259	13.1635	1096	13.1635	1092
	13.1802	916	13.1802	935	13.1802	842	13.1802	905	13.1802	1295	13.1802	1137	13.1802	1117
	13.1969	984	13.1969	955	13.1969	911	13.1969	915	13.1969	1324	13.1969	1182	13.1969	1140
	13.2136	992	13.2136	1021	13.2136	951	13.2136	940	13.2136	1298	13.2136	1142	13.2136	1104
	13.2303	979	13.2303	936	13.2303	915	13.2303	891	13.2303	1379	13.2303	1140	13.2303	1103
	13.247	1011	13.247	931	13.247	967	13.247	872	13.247	1329	13.247	1123	13.247	1111
	13.2637	998	13.2637	910	13.2637	903	13.2637	915	13.2637	1359	13.2637	1180	13.2637	1158
	13.2805	1013	13.2805	956	13.2805	855	13.2805	935	13.2805	1364	13.2805	1191	13.2805	1187
	13.2972	1018	13.2972	971	13.2972	918	13.2972	892	13.2972	1393	13.2972	1166	13.2972	1180
	13.3139	1009	13.3139	915	13.3139	944	13.3139	908	13.3139	1294	13.3139	1232	13.3139	1162
	13.3306	1009	13.3306	967	13.3306	942	13.3306	875	13.3306	1314	13.3306	1250	13.3306	1183
	13.3473	1047	13.3473	930	13.3473	928	13.3473	915	13.3473	1462	13.3473	1179	13.3473	1186
	13.364	996	13.364	1032	13.364	896	13.364	910	13.364	1458	13.364	1226	13.364	1241
	13.3807	962	13.3807	906	13.3807	938	13.3807	916	13.3807	1416	13.3807	1231	13.3807	1182
	13.3974	1025	13.3974	955	13.3974	978	13.3974	924	13.3974	1500	13.3974	1256	13.3974	1251
	13.4141	1081	13.4141	918	13.4141	917	13.4141	968	13.4141	1450	13.4141	1298	13.4141	1232
	13.4309	1152	13.4309	947	13.4309	937	13.4309	924	13.4309	1486	13.4309	1281	13.4309	1232
	13.4476	1039	13.4476	920	13.4476	943	13.4476	951	13.4476	1513	13.4476	1341	13.4476	1348
	13.4643	1035	13.4643	911	13.4643	881	13.4643	857	13.4643	1485	13.4643	1241	13.4643	1297
	13.481	1028	13.481	946	13.481	959	13.481	908	13.481	1522	13.481	1228	13.481	1287
	13.4977	1140	13.4977	890	13.4977	990	13.4977	918	13.4977	1611	13.4977	1392	13.4977	1320
	13.5144	1152	13.5144	970	13.5144	924	13.5144	915	13.5144	1611	13.5144	1410	13.5144	1386
	13.5311	1063	13.5311	914	13.5311	1004	13.5311	946	13.5311	1668	13.5311	1381	13.5311	1421
	13.5478	1171	13.5478	946	13.5478	966	13.5478	954	13.5478	1729	13.5478	1462	13.5478	1394
	13.5646	1083	13.5646	890	13.5646	964	13.5646	932	13.5646	1698	13.5646	1515	13.5646	1438
	13.5813	1135	13.5813	961	13.5813	1002	13.5813	964	13.5813	1727	13.5813	1580	13.5813	1561
	13.598	1138	13.598	930	13.598	1025	13.598	940	13.598	1838	13.598	1552	13.598	1520
	13.6147	1226	13.6147	918	13.6147	959	13.6147	998	13.6147	1803	13.6147	1605	13.6147	1617
	13.6314	1310	13.6314	931	13.6314	1013	13.6314	949	13.6314	1881	13.6314	1611	13.6314	1646
	13.6481	1229	13.6481	986	13.6481	1083	13.6481	977	13.6481	1928	13.6481	1701	13.6481	1724
	13.6648	1248	13.6648	891	13.6648	1080	13.6648	991	13.6648	1925	13.6648	1853	13.6648	1826
	13.6815	1269	13.6815	904	13.6815	1048	13.6815	965	13.6815	1969	13.6815	1795	13.6815	1894
	13.6982	1304	13.6982	954	13.6982	1121	13.6982	1046	13.6982	1951	13.6982	1886	13.6982	1928
	13.715	1357	13.715	959	13.715	1086	13.715	1098	13.715	2015	13.715	1996	13.715	1977
	13.7317	1372	13.7317	914	13.7317	1183	13.7317	1073	13.7317	2166	13.7317	2078	13.7317	2007
	13.7484	1429	13.7484	933	13.7484	1271	13.7484	1099	13.7484	2188	13.7484	2224	13.7484	2185
	13.7651	1495	13.7651	979	13.7651	1176	13.7651	1192	13.7651	2242	13.7651	2298	13.7651	2241
	13.7818	1541	13.7818	951	13.7818	1291	13.7818	1208	13.7818	2320	13.7818	2521	13.7818	2437
	13.7985	1621	13.7985	1057	13.7985	1370	13.7985	1309	13.7985	2448	13.7985	2593	13.7985	2555
	13.8152	1668	13.8152	949	13.8152	1348	13.8152	1317	13.8152	2558	13.8152	2785	13.8152	2665
	13.8319	1731	13.8319	994	13.8319	1471	13.8319	1419	13.8319	2745	13.8319	2988	13.8319	2664
	13.8486	1830	13.8486	1139	13.8486	1537	13.8486	1500	13.8486	2846	13.8486	3175	13.8486	2899
	13.8654	1912	13.8654	1036	13.8654	1722	13.8654	1584	13.8654	2882	13.8654	3382	13.8654	3111
	13.8821	2134	13.8821	1073	13.8821	1761	13.8821	1627	13.8821	3043	13.8821	3591	13.8821	3285
	13.8988	2177	13.8988	1093	13.8988	1789	13.8988	1801	13.8988	3162	13.8988	3957	13.8988	3381
	13.9155	2310	13.9155	1190	13.9155	1966	13.9155	1962	13.9155	3320	13.9155	4291	13.9155	3764
	13.9322	2468	13.9322	1227	13.9322	2257	13.9322	2052	13.9322	3469	13.9322	4760	13.9322	3930
	13.9489	2744	13.9489	1289	13.9489	2415	13.9489	2321	13.9489	3590	13.9489	5192	13.9489	4141
	13.9656	3027	13.9656	1304	13.9656	2597	13.9656	2616	13.9656	3876	13.9656	5684	13.9656	4554
	13.9823	3200	13.9823	1362	13.9823	2936	13.9823	2839	13.9823	4233	13.9823	6331	13.9823	4804
	13.9991	3454	13.9991	1496	13.9991	3358	13.9991	3219	13.9991	4429	13.9991	6930	13.9991	5168
	14.0158	3850	14.0158	1542	14.0158	3829	14.0158	3690	14.0158	4725	14.0158	7814	14.0158	5378
	14.0325	4313	14.0325	1789	14.0325	4414	14.0325	4143	14.0325	4939	14.0325	8478	14.0325	5803
	14.0492	4688	14.0492	1963	14.0492	5026	14.0492	4929	14.0492	5228	14.0492	9328	14.0492	6249
	14.0659	5058	14.0659	2097	14.0659	5877	14.0659	5949	14.0659	5203	14.0659	10044	14.0659	6767
	14.0826	5180	14.0826	2430	14.0826	7154	14.0826	6951	14.0826	5049	14.0826	10142	14.0826	7399
	14.0993	5045	14.0993	2917	14.0993	8809	14.0993	8563	14.0993	4829	14.0993	9393	14.0993	7690
	14.116	4474	14.116	3420	14.116	10826	14.116	10577	14.116	4450	14.116	8135	14.116	7770
	14.1327	3908	14.1327	4346	14.1327	14069	14.1327	13680	14.1327	3791	14.1327	6708	14.1327	7531
	14.1494	3424	14.1494	5217	14.1494	15874	14.1494	17024	14.1494	3417	14.1494	5313	14.1494	6975
	14.1662	2871	14.1662	5481	14.1662	15794	14.1662	18333	14.1662	2981	14.1662	4288	14.1662	6312
	14.1829	2489	14.1829	4431	14.1829	12834	14.1829	15471	14.1829	2763	14.1829	3474	14.1829	5460
	14.1996	2156	14.1996	3354	14.1996	9206	14.1996	10816	14.1996	2393	14.1996	2943	14.1996	4650
	14.2163	1976	14.2163	2242	14.2163	6175	14.2163	6629	14.2163	2181	14.2163	2621	14.2163	4151
	14.233	1854	14.233	1757	14.233	4059	14.233	4079	14.233	1998	14.233	2409	14.233	3707
	14.2497	1750	14.2497	1493	14.2497	2992	14.2497	2979	14.2497	1949	14.2497	2231	14.2497	3573
	14.2664	1688	14.2664	1395	14.2664	2523	14.2664	2645	14.2664	1929	14.2664	2125	14.2664	3334
	14.2831	1699	14.2831	1276	14.2831	2379	14.2831	2402	14.2831	1765	14.2831	1944	14.2831	3382
	14.2998	1615	14.2998	1355	14.2998	2238	14.2998	2260	14.2998	1686	14.2998	1926	14.2998	3302
	14.3166	1659	14.3166	1281	14.3166	2182	14.3166	2247	14.3166	1652	14.3166	1770	14.3166	3338
	14.3333	1750	14.3333	1429	14.3333	2283	14.3333	2278	14.3333	1578	14.3333	1799	14.3333	3361
	14.35	1720	14.35	1377	14.35	2176	14.35	2189	14.35	1557	14.35	1741	14.35	3405
	14.3667	1717	14.3667	1405	14.3667	2231	14.3667	2099	14.3667	1474	14.3667	1635	14.3667	3398
	14.3834	1702	14.3834	1399	14.3834	2258	14.3834	2147	14.3834	1515	14.3834	1636	14.3834	3456
	14.4001	1702	14.4001	1404	14.4001	2212	14.4001	1984	14.4001	1438	14.4001	1595	14.4001	3531
	14.4168	1747	14.4168	1449	14.4168	2231	14.4168	1829	14.4168	1317	14.4168	1492	14.4168	3756
	14.4335	1745	14.4335	1392	14.4335	2134	14.4335	1669	14.4335	1321	14.4335	1400	14.4335	3882
	14.4503	1868	14.4503	1430	14.4503	2024	14.4503	1650	14.4503	1350	14.4503	1242	14.4503	4015
	14.467	1781	14.467	1523	14.467	1788	14.467	1595	14.467	1354	14.467	1322	14.467	3881
	14.4837	1729	14.4837	1507	14.4837	1693	14.4837	1452	14.4837	1318	14.4837	1205	14.4837	3516
	14.5004	1752	14.5004	1472	14.5004	1561	14.5004	1413	14.5004	1285	14.5004	1177	14.5004	2928
	14.5171	1572	14.5171	1597	14.5171	1469	14.5171	1310	14.5171	1257	14.5171	1148	14.5171	2440
	14.5338	1500	14.5338	1714	14.5338	1302	14.5338	1202	14.5338	1198	14.5338	1149	14.5338	1959
	14.5505	1367	14.5505	1726	14.5505	1268	14.5505	1078	14.5505	1196	14.5505	1190	14.5505	1721
	14.5672	1232	14.5672	1717	14.5672	1158	14.5672	1165	14.5672	1226	14.5672	1146	14.5672	1515
	14.5839	1148	14.5839	1525	14.5839	1190	14.5839	1077	14.5839	1162	14.5839	1135	14.5839	1416
	14.6006	1053	14.6006	1292	14.6006	1099	14.6006	1037	14.6006	1140	14.6006	1179	14.6006	1367
	14.6174	1016	14.6174	1139	14.6174	1107	14.6174	940	14.6174	1118	14.6174	1094	14.6174	1309
	14.6341	1020	14.6341	982	14.6341	1068	14.6341	976	14.6341	1160	14.6341	1102	14.6341	1196
	14.6508	982	14.6508	969	14.6508	1057	14.6508	935	14.6508	1081	14.6508	1035	14.6508	1263
	14.6675	999	14.6675	869	14.6675	981	14.6675	929	14.6675	1124	14.6675	1042	14.6675	1152
	14.6842	960	14.6842	913	14.6842	947	14.6842	918	14.6842	1078	14.6842	1068	14.6842	1145
	14.7009	909	14.7009	914	14.7009	936	14.7009	955	14.7009	1080	14.7009	1029	14.7009	1141
	14.7176	935	14.7176	888	14.7176	969	14.7176	909	14.7176	1078	14.7176	1094	14.7176	1198
	14.7343	912	14.7343	882	14.7343	994	14.7343	993	14.7343	1141	14.7343	1002	14.7343	1106
	14.751	924	14.751	884	14.751	950	14.751	915	14.751	1072	14.751	1015	14.751	1051
	14.7678	916	14.7678	869	14.7678	947	14.7678	922	14.7678	1080	14.7678	1016	14.7678	1072
	14.7845	934	14.7845	844	14.7845	906	14.7845	911	14.7845	1052	14.7845	1012	14.7845	1035
	14.8012	915	14.8012	887	14.8012	931	14.8012	869	14.8012	1055	14.8012	991	14.8012	1031
	14.8179	841	14.8179	917	14.8179	886	14.8179	917	14.8179	988	14.8179	962	14.8179	1046
	14.8346	889	14.8346	863	14.8346	896	14.8346	951	14.8346	987	14.8346	1005	14.8346	1016
	14.8513	866	14.8513	824	14.8513	974	14.8513	935	14.8513	1019	14.8513	1019	14.8513	982
	14.868	861	14.868	818	14.868	968	14.868	885	14.868	998	14.868	1050	14.868	929
	14.8847	884	14.8847	846	14.8847	931	14.8847	858	14.8847	1009	14.8847	1003	14.8847	1056
	14.9015	903	14.9015	810	14.9015	940	14.9015	915	14.9015	993	14.9015	964	14.9015	895
	14.9182	850	14.9182	842	14.9182	912	14.9182	920	14.9182	989	14.9182	960	14.9182	930
	14.9349	889	14.9349	882	14.9349	957	14.9349	936	14.9349	968	14.9349	964	14.9349	958
	14.9516	866	14.9516	817	14.9516	919	14.9516	931	14.9516	947	14.9516	969	14.9516	939
	14.9683	818	14.9683	844	14.9683	918	14.9683	926	14.9683	1028	14.9683	990	14.9683	917
	14.985	900	14.985	813	14.985	889	14.985	947	14.985	960	14.985	959	14.985	917
	15.0017	913	15.0017	817	15.0017	914	15.0017	912	15.0017	1024	15.0017	912	15.0017	964
	15.0184	826	15.0184	827	15.0184	943	15.0184	912	15.0184	924	15.0184	987	15.0184	926
	15.0351	791	15.0351	835	15.0351	944	15.0351	861	15.0351	948	15.0351	908	15.0351	889
	15.0519	879	15.0519	873	15.0519	922	15.0519	861	15.0519	977	15.0519	927	15.0519	886
	15.0686	832	15.0686	826	15.0686	919	15.0686	901	15.0686	911	15.0686	897	15.0686	891
	15.0853	837	15.0853	860	15.0853	912	15.0853	848	15.0853	1008	15.0853	904	15.0853	908
	15.102	824	15.102	781	15.102	916	15.102	895	15.102	945	15.102	951	15.102	912
	15.1187	852	15.1187	833	15.1187	864	15.1187	942	15.1187	886	15.1187	947	15.1187	919
	15.1354	860	15.1354	879	15.1354	860	15.1354	867	15.1354	918	15.1354	899	15.1354	963
	15.1521	830	15.1521	787	15.1521	937	15.1521	922	15.1521	910	15.1521	878	15.1521	920
	15.1688	841	15.1688	778	15.1688	860	15.1688	850	15.1688	921	15.1688	917	15.1688	876
	15.1855	832	15.1855	832	15.1855	930	15.1855	856	15.1855	901	15.1855	913	15.1855	860
	15.2023	880	15.2023	823	15.2023	860	15.2023	838	15.2023	969	15.2023	905	15.2023	885
	15.219	847	15.219	831	15.219	864	15.219	813	15.219	859	15.219	866	15.219	891
	15.2357	834	15.2357	853	15.2357	820	15.2357	894	15.2357	942	15.2357	909	15.2357	874
	15.2524	827	15.2524	818	15.2524	930	15.2524	873	15.2524	902	15.2524	894	15.2524	878
	15.2691	828	15.2691	759	15.2691	882	15.2691	870	15.2691	928	15.2691	885	15.2691	809
	15.2858	829	15.2858	807	15.2858	900	15.2858	814	15.2858	904	15.2858	942	15.2858	924
	15.3025	795	15.3025	794	15.3025	884	15.3025	827	15.3025	963	15.3025	897	15.3025	869
	15.3192	767	15.3192	811	15.3192	859	15.3192	795	15.3192	889	15.3192	885	15.3192	814
	15.336	787	15.336	798	15.336	909	15.336	820	15.336	963	15.336	889	15.336	828
	15.3527	815	15.3527	821	15.3527	933	15.3527	810	15.3527	931	15.3527	849	15.3527	853
	15.3694	809	15.3694	813	15.3694	850	15.3694	842	15.3694	936	15.3694	845	15.3694	852
	15.3861	839	15.3861	833	15.3861	873	15.3861	835	15.3861	849	15.3861	872	15.3861	824
	15.4028	827	15.4028	800	15.4028	849	15.4028	831	15.4028	884	15.4028	865	15.4028	846
	15.4195	818	15.4195	785	15.4195	893	15.4195	866	15.4195	887	15.4195	831	15.4195	833
	15.4362	774	15.4362	805	15.4362	835	15.4362	825	15.4362	897	15.4362	879	15.4362	900
	15.4529	782	15.4529	804	15.4529	841	15.4529	829	15.4529	861	15.4529	879	15.4529	859
	15.4696	825	15.4696	777	15.4696	860	15.4696	819	15.4696	836	15.4696	839	15.4696	841
	15.4863	806	15.4863	796	15.4863	853	15.4863	879	15.4863	919	15.4863	851	15.4863	832
	15.5031	769	15.5031	776	15.5031	850	15.5031	823	15.5031	908	15.5031	887	15.5031	807
	15.5198	841	15.5198	793	15.5198	827	15.5198	801	15.5198	852	15.5198	786	15.5198	826
	15.5365	820	15.5365	832	15.5365	831	15.5365	840	15.5365	884	15.5365	872	15.5365	829
	15.5532	784	15.5532	801	15.5532	867	15.5532	858	15.5532	877	15.5532	890	15.5532	822
	15.5699	834	15.5699	790	15.5699	824	15.5699	827	15.5699	858	15.5699	849	15.5699	832
	15.5866	833	15.5866	800	15.5866	831	15.5866	855	15.5866	837	15.5866	820	15.5866	806
	15.6033	809	15.6033	770	15.6033	851	15.6033	852	15.6033	848	15.6033	815	15.6033	798
	15.62	801	15.62	785	15.62	831	15.62	833	15.62	866	15.62	812	15.62	810
	15.6367	794	15.6367	785	15.6367	860	15.6367	812	15.6367	822	15.6367	815	15.6367	812
	15.6535	759	15.6535	787	15.6535	868	15.6535	815	15.6535	838	15.6535	864	15.6535	804
	15.6702	809	15.6702	799	15.6702	823	15.6702	852	15.6702	902	15.6702	836	15.6702	810
	15.6869	791	15.6869	811	15.6869	823	15.6869	807	15.6869	778	15.6869	846	15.6869	795
	15.7036	797	15.7036	812	15.7036	867	15.7036	837	15.7036	830	15.7036	784	15.7036	807
	15.7203	778	15.7203	795	15.7203	847	15.7203	858	15.7203	916	15.7203	874	15.7203	815
	15.737	804	15.737	743	15.737	890	15.737	857	15.737	885	15.737	863	15.737	804
	15.7537	783	15.7537	800	15.7537	849	15.7537	808	15.7537	827	15.7537	853	15.7537	778
	15.7704	813	15.7704	784	15.7704	857	15.7704	847	15.7704	915	15.7704	838	15.7704	847
	15.7872	793	15.7872	807	15.7872	840	15.7872	853	15.7872	798	15.7872	819	15.7872	790
	15.8039	732	15.8039	772	15.8039	793	15.8039	814	15.8039	824	15.8039	807	15.8039	841
	15.8206	767	15.8206	812	15.8206	902	15.8206	855	15.8206	807	15.8206	858	15.8206	790
	15.8373	730	15.8373	778	15.8373	841	15.8373	884	15.8373	844	15.8373	842	15.8373	805
	15.854	793	15.854	781	15.854	888	15.854	841	15.854	875	15.854	874	15.854	811
	15.8707	755	15.8707	820	15.8707	800	15.8707	846	15.8707	761	15.8707	792	15.8707	824
	15.8874	764	15.8874	779	15.8874	854	15.8874	820	15.8874	825	15.8874	814	15.8874	772
	15.9041	782	15.9041	860	15.9041	850	15.9041	836	15.9041	840	15.9041	795	15.9041	765
	15.9208	795	15.9208	764	15.9208	842	15.9208	832	15.9208	838	15.9208	817	15.9208	759
	15.9375	791	15.9375	848	15.9375	820	15.9375	799	15.9375	847	15.9375	820	15.9375	847
	15.9543	791	15.9543	827	15.9543	792	15.9543	802	15.9543	852	15.9543	768	15.9543	770
	15.971	783	15.971	847	15.971	791	15.971	804	15.971	811	15.971	800	15.971	775
	15.9877	785	15.9877	909	15.9877	834	15.9877	805	15.9877	812	15.9877	746	15.9877	769
	16.0044	820	16.0044	912	16.0044	844	16.0044	833	16.0044	815	16.0044	804	16.0044	818
	16.0211	749	16.0211	1010	16.0211	836	16.0211	808	16.0211	828	16.0211	817	16.0211	821
	16.0378	812	16.0378	1000	16.0378	845	16.0378	834	16.0378	791	16.0378	797	16.0378	750
	16.0545	766	16.0545	1054	16.0545	823	16.0545	833	16.0545	845	16.0545	776	16.0545	817
	16.0712	781	16.0712	1179	16.0712	849	16.0712	832	16.0712	796	16.0712	812	16.0712	765
	16.088	765	16.088	1311	16.088	847	16.088	755	16.088	795	16.088	801	16.088	837
	16.1047	805	16.1047	1460	16.1047	838	16.1047	771	16.1047	839	16.1047	815	16.1047	769
	16.1214	778	16.1214	1667	16.1214	835	16.1214	751	16.1214	797	16.1214	798	16.1214	754
	16.1381	775	16.1381	1540	16.1381	858	16.1381	830	16.1381	810	16.1381	838	16.1381	811
	16.1548	760	16.1548	1399	16.1548	856	16.1548	861	16.1548	834	16.1548	775	16.1548	727
	16.1715	764	16.1715	1258	16.1715	797	16.1715	799	16.1715	829	16.1715	802	16.1715	826
	16.1882	791	16.1882	1070	16.1882	846	16.1882	752	16.1882	784	16.1882	825	16.1882	814
	16.2049	798	16.2049	956	16.2049	779	16.2049	792	16.2049	819	16.2049	831	16.2049	758
	16.2217	766	16.2217	878	16.2217	822	16.2217	756	16.2217	771	16.2217	787	16.2217	765
	16.2384	716	16.2384	793	16.2384	803	16.2384	741	16.2384	776	16.2384	778	16.2384	820
	16.2551	770	16.2551	884	16.2551	791	16.2551	750	16.2551	817	16.2551	794	16.2551	778
	16.2718	765	16.2718	854	16.2718	780	16.2718	814	16.2718	805	16.2718	798	16.2718	856
	16.2885	706	16.2885	888	16.2885	797	16.2885	777	16.2885	824	16.2885	780	16.2885	829
	16.3052	756	16.3052	830	16.3052	792	16.3052	724	16.3052	781	16.3052	815	16.3052	725
	16.3219	708	16.3219	902	16.3219	758	16.3219	796	16.3219	807	16.3219	722	16.3219	800
	16.3386	756	16.3386	823	16.3386	821	16.3386	766	16.3386	775	16.3386	795	16.3386	770
	16.3553	744	16.3553	751	16.3553	813	16.3553	743	16.3553	784	16.3553	781	16.3553	771
	16.3721	756	16.3721	770	16.3721	786	16.3721	781	16.3721	845	16.3721	787	16.3721	802
	16.3888	729	16.3888	768	16.3888	804	16.3888	788	16.3888	848	16.3888	819	16.3888	774
	16.4055	757	16.4055	763	16.4055	788	16.4055	778	16.4055	860	16.4055	791	16.4055	731
	16.4222	780	16.4222	772	16.4222	797	16.4222	781	16.4222	798	16.4222	787	16.4222	766
	16.4389	728	16.4389	746	16.4389	809	16.4389	821	16.4389	786	16.4389	739	16.4389	723
	16.4556	755	16.4556	761	16.4556	814	16.4556	793	16.4556	777	16.4556	810	16.4556	767
	16.4723	725	16.4723	745	16.4723	772	16.4723	760	16.4723	791	16.4723	750	16.4723	780
	16.489	760	16.489	723	16.489	764	16.489	743	16.489	766	16.489	764	16.489	755
	16.5057	750	16.5057	767	16.5057	806	16.5057	745	16.5057	803	16.5057	760	16.5057	740
	16.5224	727	16.5224	748	16.5224	725	16.5224	770	16.5224	823	16.5224	788	16.5224	770
	16.5392	743	16.5392	686	16.5392	807	16.5392	771	16.5392	791	16.5392	782	16.5392	771
	16.5559	765	16.5559	733	16.5559	737	16.5559	775	16.5559	757	16.5559	760	16.5559	780
	16.5726	756	16.5726	739	16.5726	744	16.5726	795	16.5726	793	16.5726	753	16.5726	759
	16.5893	708	16.5893	769	16.5893	800	16.5893	728	16.5893	757	16.5893	710	16.5893	761
	16.606	734	16.606	763	16.606	771	16.606	745	16.606	785	16.606	755	16.606	774
	16.6227	727	16.6227	703	16.6227	768	16.6227	725	16.6227	868	16.6227	791	16.6227	739
	16.6394	744	16.6394	709	16.6394	793	16.6394	755	16.6394	791	16.6394	794	16.6394	742
	16.6561	736	16.6561	726	16.6561	808	16.6561	682	16.6561	755	16.6561	841	16.6561	755
	16.6729	749	16.6729	739	16.6729	733	16.6729	795	16.6729	783	16.6729	768	16.6729	698
	16.6896	791	16.6896	690	16.6896	732	16.6896	754	16.6896	779	16.6896	824	16.6896	761
	16.7063	765	16.7063	750	16.7063	772	16.7063	720	16.7063	791	16.7063	753	16.7063	708
	16.723	752	16.723	703	16.723	743	16.723	764	16.723	756	16.723	718	16.723	747
	16.7397	738	16.7397	713	16.7397	712	16.7397	724	16.7397	788	16.7397	782	16.7397	747
	16.7564	755	16.7564	733	16.7564	766	16.7564	738	16.7564	742	16.7564	739	16.7564	723
	16.7731	698	16.7731	733	16.7731	748	16.7731	759	16.7731	740	16.7731	812	16.7731	784
	16.7898	736	16.7898	734	16.7898	767	16.7898	732	16.7898	726	16.7898	763	16.7898	756
	16.8065	697	16.8065	697	16.8065	755	16.8065	721	16.8065	797	16.8065	729	16.8065	693
	16.8233	726	16.8233	693	16.8233	730	16.8233	729	16.8233	792	16.8233	764	16.8233	753
	16.84	772	16.84	714	16.84	746	16.84	690	16.84	795	16.84	764	16.84	734
	16.8567	700	16.8567	708	16.8567	792	16.8567	741	16.8567	764	16.8567	757	16.8567	742
	16.8734	714	16.8734	778	16.8734	732	16.8734	711	16.8734	786	16.8734	758	16.8734	681
	16.8901	706	16.8901	728	16.8901	759	16.8901	796	16.8901	739	16.8901	783	16.8901	743
	16.9068	814	16.9068	693	16.9068	723	16.9068	736	16.9068	750	16.9068	738	16.9068	756
	16.9235	734	16.9235	749	16.9235	706	16.9235	726	16.9235	782	16.9235	787	16.9235	702
	16.9402	672	16.9402	676	16.9402	737	16.9402	740	16.9402	763	16.9402	773	16.9402	677
	16.9569	745	16.9569	746	16.9569	777	16.9569	777	16.9569	744	16.9569	724	16.9569	729
	16.9736	700	16.9736	701	16.9736	720	16.9736	747	16.9736	766	16.9736	722	16.9736	764
	16.9904	743	16.9904	700	16.9904	752	16.9904	714	16.9904	785	16.9904	716	16.9904	767
	17.0071	740	17.0071	729	17.0071	750	17.0071	737	17.0071	796	17.0071	767	17.0071	672
	17.0238	656	17.0238	719	17.0238	756	17.0238	722	17.0238	793	17.0238	771	17.0238	668
	17.0405	738	17.0405	702	17.0405	737	17.0405	696	17.0405	755	17.0405	726	17.0405	759
	17.0572	647	17.0572	722	17.0572	745	17.0572	701	17.0572	742	17.0572	756	17.0572	718
	17.0739	711	17.0739	712	17.0739	786	17.0739	694	17.0739	751	17.0739	715	17.0739	686
	17.0906	683	17.0906	770	17.0906	708	17.0906	775	17.0906	780	17.0906	774	17.0906	743
	17.1073	738	17.1073	733	17.1073	689	17.1073	760	17.1073	763	17.1073	750	17.1073	772
	17.1241	733	17.1241	695	17.1241	765	17.1241	712	17.1241	753	17.1241	748	17.1241	650
	17.1408	711	17.1408	665	17.1408	759	17.1408	721	17.1408	751	17.1408	783	17.1408	700
	17.1575	749	17.1575	754	17.1575	713	17.1575	718	17.1575	738	17.1575	719	17.1575	714
	17.1742	722	17.1742	693	17.1742	751	17.1742	745	17.1742	681	17.1742	701	17.1742	644
	17.1909	702	17.1909	730	17.1909	718	17.1909	671	17.1909	718	17.1909	754	17.1909	705
	17.2076	713	17.2076	682	17.2076	720	17.2076	742	17.2076	752	17.2076	773	17.2076	743
	17.2243	664	17.2243	699	17.2243	672	17.2243	666	17.2243	734	17.2243	760	17.2243	688
	17.241	753	17.241	669	17.241	698	17.241	739	17.241	756	17.241	714	17.241	695
	17.2578	700	17.2578	703	17.2578	741	17.2578	661	17.2578	651	17.2578	778	17.2578	738
	17.2745	702	17.2745	729	17.2745	724	17.2745	667	17.2745	759	17.2745	796	17.2745	695
	17.2912	690	17.2912	744	17.2912	744	17.2912	706	17.2912	771	17.2912	752	17.2912	705
	17.3079	685	17.3079	730	17.3079	706	17.3079	700	17.3079	749	17.3079	764	17.3079	702
	17.3246	704	17.3246	721	17.3246	741	17.3246	706	17.3246	740	17.3246	718	17.3246	715
	17.3413	747	17.3413	740	17.3413	738	17.3413	696	17.3413	748	17.3413	788	17.3413	738
	17.358	692	17.358	730	17.358	681	17.358	673	17.358	737	17.358	700	17.358	704
	17.3747	687	17.3747	733	17.3747	768	17.3747	678	17.3747	733	17.3747	731	17.3747	699
	17.3914	655	17.3914	718	17.3914	697	17.3914	696	17.3914	774	17.3914	739	17.3914	690
	17.4081	655	17.4081	782	17.4081	693	17.4081	624	17.4081	736	17.4081	714	17.4081	692
	17.4249	733	17.4249	812	17.4249	713	17.4249	708	17.4249	753	17.4249	790	17.4249	723
	17.4416	732	17.4416	772	17.4416	643	17.4416	698	17.4416	728	17.4416	726	17.4416	743
	17.4583	681	17.4583	741	17.4583	705	17.4583	701	17.4583	681	17.4583	794	17.4583	661
	17.475	687	17.475	734	17.475	684	17.475	705	17.475	731	17.475	723	17.475	699
	17.4917	641	17.4917	699	17.4917	697	17.4917	724	17.4917	706	17.4917	698	17.4917	662
	17.5084	715	17.5084	723	17.5084	727	17.5084	734	17.5084	773	17.5084	712	17.5084	729
	17.5251	683	17.5251	711	17.5251	665	17.5251	759	17.5251	737	17.5251	754	17.5251	700
	17.5418	702	17.5418	717	17.5418	689	17.5418	713	17.5418	745	17.5418	700	17.5418	669
	17.5586	727	17.5586	710	17.5586	721	17.5586	679	17.5586	709	17.5586	727	17.5586	702
	17.5753	714	17.5753	692	17.5753	697	17.5753	741	17.5753	711	17.5753	694	17.5753	739
	17.592	651	17.592	695	17.592	666	17.592	719	17.592	686	17.592	719	17.592	717
	17.6087	723	17.6087	740	17.6087	740	17.6087	715	17.6087	744	17.6087	670	17.6087	687
	17.6254	669	17.6254	679	17.6254	753	17.6254	713	17.6254	727	17.6254	709	17.6254	712
	17.6421	655	17.6421	688	17.6421	703	17.6421	663	17.6421	768	17.6421	714	17.6421	737
	17.6588	676	17.6588	658	17.6588	700	17.6588	738	17.6588	720	17.6588	652	17.6588	668
	17.6755	716	17.6755	690	17.6755	752	17.6755	710	17.6755	704	17.6755	711	17.6755	654
	17.6922	691	17.6922	625	17.6922	669	17.6922	630	17.6922	745	17.6922	729	17.6922	732
	17.709	660	17.709	699	17.709	741	17.709	715	17.709	691	17.709	733	17.709	705
	17.7257	695	17.7257	660	17.7257	681	17.7257	728	17.7257	717	17.7257	763	17.7257	689
	17.7424	710	17.7424	630	17.7424	685	17.7424	652	17.7424	752	17.7424	713	17.7424	670
	17.7591	684	17.7591	683	17.7591	710	17.7591	690	17.7591	671	17.7591	731	17.7591	713
	17.7758	634	17.7758	659	17.7758	689	17.7758	648	17.7758	668	17.7758	650	17.7758	694
	17.7925	718	17.7925	631	17.7925	730	17.7925	700	17.7925	693	17.7925	706	17.7925	644
	17.8092	718	17.8092	664	17.8092	751	17.8092	685	17.8092	741	17.8092	750	17.8092	743
	17.8259	690	17.8259	660	17.8259	744	17.8259	681	17.8259	701	17.8259	730	17.8259	685
	17.8426	688	17.8426	645	17.8426	692	17.8426	690	17.8426	725	17.8426	675	17.8426	736
	17.8593	694	17.8593	668	17.8593	705	17.8593	667	17.8593	738	17.8593	699	17.8593	639
	17.8761	651	17.8761	678	17.8761	682	17.8761	630	17.8761	721	17.8761	714	17.8761	672
	17.8928	708	17.8928	678	17.8928	678	17.8928	731	17.8928	755	17.8928	746	17.8928	661
	17.9095	696	17.9095	641	17.9095	716	17.9095	675	17.9095	752	17.9095	686	17.9095	689
	17.9262	672	17.9262	701	17.9262	689	17.9262	670	17.9262	715	17.9262	697	17.9262	637
	17.9429	681	17.9429	678	17.9429	679	17.9429	666	17.9429	696	17.9429	701	17.9429	686
	17.9596	683	17.9596	711	17.9596	652	17.9596	611	17.9596	736	17.9596	734	17.9596	689
	17.9763	662	17.9763	656	17.9763	668	17.9763	635	17.9763	683	17.9763	677	17.9763	660
	17.993	692	17.993	660	17.993	673	17.993	670	17.993	712	17.993	704	17.993	675
	18.0098	673	18.0098	625	18.0098	669	18.0098	698	18.0098	706	18.0098	708	18.0098	667
	18.0265	634	18.0265	705	18.0265	694	18.0265	666	18.0265	687	18.0265	745	18.0265	656
	18.0432	710	18.0432	659	18.0432	682	18.0432	691	18.0432	698	18.0432	672	18.0432	708
	18.0599	647	18.0599	652	18.0599	703	18.0599	686	18.0599	743	18.0599	664	18.0599	648
	18.0766	676	18.0766	670	18.0766	695	18.0766	719	18.0766	754	18.0766	706	18.0766	686
	18.0933	654	18.0933	677	18.0933	706	18.0933	702	18.0933	668	18.0933	681	18.0933	703
	18.11	635	18.11	676	18.11	659	18.11	698	18.11	697	18.11	705	18.11	634
	18.1267	666	18.1267	711	18.1267	647	18.1267	647	18.1267	687	18.1267	681	18.1267	665
	18.1434	675	18.1434	655	18.1434	734	18.1434	663	18.1434	675	18.1434	697	18.1434	666
	18.1602	660	18.1602	703	18.1602	733	18.1602	691	18.1602	705	18.1602	624	18.1602	667
	18.1769	663	18.1769	678	18.1769	676	18.1769	709	18.1769	747	18.1769	649	18.1769	690
	18.1936	671	18.1936	666	18.1936	662	18.1936	765	18.1936	643	18.1936	703	18.1936	682
	18.2103	638	18.2103	673	18.2103	693	18.2103	682	18.2103	647	18.2103	688	18.2103	662
	18.227	624	18.227	654	18.227	669	18.227	622	18.227	698	18.227	732	18.227	649
	18.2437	637	18.2437	627	18.2437	684	18.2437	674	18.2437	754	18.2437	711	18.2437	670
	18.2604	650	18.2604	643	18.2604	688	18.2604	687	18.2604	700	18.2604	710	18.2604	660
	18.2771	682	18.2771	665	18.2771	706	18.2771	650	18.2771	660	18.2771	704	18.2771	662
	18.2938	664	18.2938	651	18.2938	685	18.2938	730	18.2938	699	18.2938	664	18.2938	664
	18.3106	649	18.3106	682	18.3106	644	18.3106	681	18.3106	753	18.3106	659	18.3106	687
	18.3273	716	18.3273	660	18.3273	696	18.3273	661	18.3273	710	18.3273	658	18.3273	647
	18.344	679	18.344	639	18.344	630	18.344	687	18.344	719	18.344	650	18.344	657
	18.3607	615	18.3607	702	18.3607	642	18.3607	663	18.3607	733	18.3607	695	18.3607	670
	18.3774	690	18.3774	749	18.3774	670	18.3774	659	18.3774	708	18.3774	673	18.3774	632
	18.3941	631	18.3941	692	18.3941	649	18.3941	622	18.3941	715	18.3941	691	18.3941	703
	18.4108	635	18.4108	669	18.4108	683	18.4108	641	18.4108	715	18.4108	670	18.4108	692
	18.4275	660	18.4275	721	18.4275	702	18.4275	657	18.4275	710	18.4275	669	18.4275	675
	18.4443	663	18.4443	673	18.4443	617	18.4443	665	18.4443	718	18.4443	715	18.4443	636
	18.461	636	18.461	681	18.461	663	18.461	633	18.461	696	18.461	657	18.461	635
	18.4777	709	18.4777	665	18.4777	705	18.4777	659	18.4777	687	18.4777	673	18.4777	612
	18.4944	655	18.4944	639	18.4944	701	18.4944	674	18.4944	690	18.4944	703	18.4944	592
	18.5111	704	18.5111	630	18.5111	709	18.5111	656	18.5111	731	18.5111	683	18.5111	658
	18.5278	661	18.5278	709	18.5278	640	18.5278	644	18.5278	698	18.5278	705	18.5278	661
	18.5445	629	18.5445	637	18.5445	695	18.5445	683	18.5445	718	18.5445	640	18.5445	634
	18.5612	655	18.5612	647	18.5612	729	18.5612	613	18.5612	709	18.5612	664	18.5612	698
	18.5779	646	18.5779	643	18.5779	643	18.5779	644	18.5779	740	18.5779	644	18.5779	681
	18.5947	708	18.5947	656	18.5947	694	18.5947	654	18.5947	666	18.5947	718	18.5947	573
	18.6114	641	18.6114	675	18.6114	644	18.6114	657	18.6114	681	18.6114	741	18.6114	643
	18.6281	666	18.6281	588	18.6281	692	18.6281	638	18.6281	706	18.6281	658	18.6281	668
	18.6448	662	18.6448	594	18.6448	666	18.6448	646	18.6448	666	18.6448	655	18.6448	667
	18.6615	619	18.6615	620	18.6615	657	18.6615	672	18.6615	702	18.6615	644	18.6615	643
	18.6782	669	18.6782	670	18.6782	654	18.6782	643	18.6782	693	18.6782	718	18.6782	634
	18.6949	684	18.6949	667	18.6949	630	18.6949	651	18.6949	665	18.6949	709	18.6949	658
	18.7116	659	18.7116	633	18.7116	657	18.7116	630	18.7116	657	18.7116	713	18.7116	657
	18.7283	605	18.7283	678	18.7283	688	18.7283	613	18.7283	650	18.7283	659	18.7283	714
	18.745	635	18.745	612	18.745	684	18.745	645	18.745	650	18.745	644	18.745	641
	18.7618	640	18.7618	642	18.7618	662	18.7618	622	18.7618	684	18.7618	672	18.7618	648
	18.7785	687	18.7785	673	18.7785	675	18.7785	627	18.7785	674	18.7785	686	18.7785	641
	18.7952	612	18.7952	668	18.7952	681	18.7952	657	18.7952	676	18.7952	677	18.7952	675
	18.8119	651	18.8119	675	18.8119	704	18.8119	683	18.8119	666	18.8119	691	18.8119	673
	18.8286	679	18.8286	636	18.8286	666	18.8286	622	18.8286	673	18.8286	692	18.8286	665
	18.8453	644	18.8453	590	18.8453	624	18.8453	642	18.8453	671	18.8453	656	18.8453	640
	18.862	658	18.862	603	18.862	646	18.862	657	18.862	704	18.862	702	18.862	606
	18.8787	624	18.8787	614	18.8787	668	18.8787	673	18.8787	677	18.8787	670	18.8787	646
	18.8955	655	18.8955	585	18.8955	684	18.8955	627	18.8955	724	18.8955	671	18.8955	657
	18.9122	634	18.9122	624	18.9122	676	18.9122	606	18.9122	705	18.9122	682	18.9122	642
	18.9289	636	18.9289	612	18.9289	629	18.9289	674	18.9289	701	18.9289	690	18.9289	638
	18.9456	687	18.9456	640	18.9456	689	18.9456	654	18.9456	723	18.9456	615	18.9456	658
	18.9623	625	18.9623	588	18.9623	631	18.9623	658	18.9623	724	18.9623	697	18.9623	656
	18.979	644	18.979	620	18.979	693	18.979	641	18.979	648	18.979	651	18.979	608
	18.9957	693	18.9957	628	18.9957	681	18.9957	654	18.9957	712	18.9957	670	18.9957	663
	19.0124	659	19.0124	658	19.0124	624	19.0124	667	19.0124	713	19.0124	652	19.0124	643
	19.0291	647	19.0291	655	19.0291	668	19.0291	644	19.0291	670	19.0291	616	19.0291	699
	19.0459	594	19.0459	645	19.0459	690	19.0459	642	19.0459	661	19.0459	668	19.0459	678
	19.0626	613	19.0626	637	19.0626	638	19.0626	681	19.0626	692	19.0626	688	19.0626	660
	19.0793	690	19.0793	639	19.0793	638	19.0793	608	19.0793	706	19.0793	679	19.0793	624
	19.096	621	19.096	624	19.096	718	19.096	686	19.096	602	19.096	641	19.096	638
	19.1127	666	19.1127	616	19.1127	619	19.1127	636	19.1127	701	19.1127	649	19.1127	631
	19.1294	667	19.1294	620	19.1294	692	19.1294	633	19.1294	694	19.1294	630	19.1294	599
	19.1461	659	19.1461	644	19.1461	645	19.1461	643	19.1461	637	19.1461	682	19.1461	646
	19.1628	661	19.1628	630	19.1628	656	19.1628	635	19.1628	661	19.1628	662	19.1628	581
	19.1795	597	19.1795	625	19.1795	711	19.1795	614	19.1795	670	19.1795	646	19.1795	583
	19.1962	587	19.1962	633	19.1962	656	19.1962	641	19.1962	636	19.1962	655	19.1962	642
	19.213	611	19.213	584	19.213	616	19.213	615	19.213	675	19.213	611	19.213	666
	19.2297	630	19.2297	631	19.2297	670	19.2297	675	19.2297	646	19.2297	672	19.2297	608
	19.2464	650	19.2464	609	19.2464	657	19.2464	644	19.2464	674	19.2464	674	19.2464	639
	19.2631	618	19.2631	634	19.2631	640	19.2631	608	19.2631	715	19.2631	650	19.2631	644
	19.2798	688	19.2798	602	19.2798	638	19.2798	620	19.2798	644	19.2798	721	19.2798	611
	19.2965	631	19.2965	609	19.2965	700	19.2965	641	19.2965	668	19.2965	667	19.2965	581
	19.3132	635	19.3132	636	19.3132	636	19.3132	658	19.3132	689	19.3132	644	19.3132	655
	19.3299	659	19.3299	617	19.3299	623	19.3299	689	19.3299	696	19.3299	618	19.3299	647
	19.3467	605	19.3467	606	19.3467	654	19.3467	617	19.3467	662	19.3467	685	19.3467	641
	19.3634	649	19.3634	604	19.3634	651	19.3634	654	19.3634	658	19.3634	695	19.3634	627
	19.3801	691	19.3801	616	19.3801	627	19.3801	612	19.3801	664	19.3801	643	19.3801	622
	19.3968	640	19.3968	580	19.3968	646	19.3968	605	19.3968	670	19.3968	682	19.3968	600
	19.4135	611	19.4135	632	19.4135	624	19.4135	624	19.4135	662	19.4135	610	19.4135	600
	19.4302	621	19.4302	578	19.4302	603	19.4302	574	19.4302	667	19.4302	629	19.4302	604
	19.4469	579	19.4469	632	19.4469	620	19.4469	631	19.4469	628	19.4469	625	19.4469	630
	19.4636	642	19.4636	674	19.4636	644	19.4636	624	19.4636	698	19.4636	666	19.4636	612
	19.4803	635	19.4803	647	19.4803	556	19.4803	637	19.4803	651	19.4803	671	19.4803	627
	19.4971	661	19.4971	591	19.4971	649	19.4971	614	19.4971	650	19.4971	655	19.4971	612
	19.5138	588	19.5138	613	19.5138	657	19.5138	650	19.5138	677	19.5138	641	19.5138	659
	19.5305	656	19.5305	631	19.5305	636	19.5305	607	19.5305	632	19.5305	672	19.5305	663
	19.5472	636	19.5472	606	19.5472	644	19.5472	608	19.5472	713	19.5472	651	19.5472	591
	19.5639	694	19.5639	586	19.5639	588	19.5639	612	19.5639	685	19.5639	690	19.5639	603
	19.5806	619	19.5806	621	19.5806	650	19.5806	588	19.5806	604	19.5806	586	19.5806	609
	19.5973	619	19.5973	619	19.5973	689	19.5973	603	19.5973	682	19.5973	639	19.5973	647
	19.614	656	19.614	578	19.614	692	19.614	636	19.614	649	19.614	676	19.614	658
	19.6307	645	19.6307	620	19.6307	695	19.6307	612	19.6307	651	19.6307	607	19.6307	613
	19.6475	646	19.6475	578	19.6475	681	19.6475	638	19.6475	637	19.6475	644	19.6475	584
	19.6642	656	19.6642	639	19.6642	588	19.6642	633	19.6642	744	19.6642	636	19.6642	568
	19.6809	638	19.6809	616	19.6809	595	19.6809	654	19.6809	678	19.6809	652	19.6809	660
	19.6976	640	19.6976	605	19.6976	640	19.6976	619	19.6976	644	19.6976	610	19.6976	600
	19.7143	642	19.7143	596	19.7143	617	19.7143	684	19.7143	659	19.7143	624	19.7143	660
	19.731	659	19.731	613	19.731	649	19.731	631	19.731	697	19.731	633	19.731	648
	19.7477	632	19.7477	588	19.7477	693	19.7477	591	19.7477	617	19.7477	678	19.7477	643
	19.7644	650	19.7644	611	19.7644	700	19.7644	623	19.7644	670	19.7644	620	19.7644	635
	19.7812	648	19.7812	631	19.7812	652	19.7812	654	19.7812	673	19.7812	655	19.7812	639
	19.7979	644	19.7979	624	19.7979	659	19.7979	633	19.7979	584	19.7979	674	19.7979	648
	19.8146	636	19.8146	602	19.8146	654	19.8146	600	19.8146	633	19.8146	700	19.8146	567
	19.8313	610	19.8313	611	19.8313	640	19.8313	643	19.8313	640	19.8313	676	19.8313	590
	19.848	683	19.848	628	19.848	678	19.848	624	19.848	612	19.848	647	19.848	607
	19.8647	630	19.8647	606	19.8647	672	19.8647	615	19.8647	657	19.8647	686	19.8647	608
	19.8814	639	19.8814	574	19.8814	657	19.8814	614	19.8814	692	19.8814	631	19.8814	599
	19.8981	634	19.8981	615	19.8981	686	19.8981	687	19.8981	699	19.8981	662	19.8981	655
	19.9148	644	19.9148	625	19.9148	650	19.9148	716	19.9148	646	19.9148	643	19.9148	579
	19.9316	631	19.9316	629	19.9316	739	19.9316	675	19.9316	656	19.9316	622	19.9316	658
	19.9483	661	19.9483	561	19.9483	769	19.9483	733	19.9483	650	19.9483	633	19.9483	584
	19.965	678	19.965	633	19.965	706	19.965	663	19.965	693	19.965	690	19.965	638
	19.9817	670	19.9817	658	19.9817	747	19.9817	702	19.9817	670	19.9817	658	19.9817	621
	19.9984	638	19.9984	676	19.9984	840	19.9984	697	19.9984	718	19.9984	702	19.9984	610
	20.0151	766	20.0151	594	20.0151	813	20.0151	751	20.0151	715	20.0151	679	20.0151	625
	20.0318	760	20.0318	613	20.0318	911	20.0318	788	20.0318	714	20.0318	682	20.0318	594
	20.0485	726	20.0485	624	20.0485	1080	20.0485	829	20.0485	692	20.0485	644	20.0485	575
	20.0652	700	20.0652	632	20.0652	1172	20.0652	930	20.0652	747	20.0652	673	20.0652	561
	20.0819	795	20.0819	630	20.0819	1220	20.0819	997	20.0819	737	20.0819	706	20.0819	624
	20.0987	940	20.0987	645	20.0987	1373	20.0987	1110	20.0987	782	20.0987	706	20.0987	645
	20.1154	1056	20.1154	682	20.1154	1366	20.1154	1338	20.1154	742	20.1154	727	20.1154	595
	20.1321	1185	20.1321	746	20.1321	1651	20.1321	1503	20.1321	824	20.1321	761	20.1321	576
	20.1488	1094	20.1488	705	20.1488	1964	20.1488	1732	20.1488	882	20.1488	835	20.1488	588
	20.1655	1158	20.1655	766	20.1655	2279	20.1655	1867	20.1655	831	20.1655	933	20.1655	597
	20.1822	1060	20.1822	745	20.1822	2047	20.1822	1619	20.1822	799	20.1822	979	20.1822	638
	20.1989	923	20.1989	760	20.1989	1655	20.1989	1257	20.1989	820	20.1989	809	20.1989	618
	20.2156	827	20.2156	749	20.2156	1374	20.2156	1121	20.2156	745	20.2156	754	20.2156	592
	20.2324	717	20.2324	695	20.2324	1066	20.2324	861	20.2324	666	20.2324	745	20.2324	579
	20.2491	700	20.2491	730	20.2491	836	20.2491	717	20.2491	668	20.2491	655	20.2491	618
	20.2658	694	20.2658	705	20.2658	798	20.2658	660	20.2658	682	20.2658	672	20.2658	623
	20.2825	671	20.2825	692	20.2825	710	20.2825	686	20.2825	648	20.2825	614	20.2825	556
	20.2992	716	20.2992	633	20.2992	658	20.2992	619	20.2992	627	20.2992	660	20.2992	646
	20.3159	652	20.3159	643	20.3159	682	20.3159	654	20.3159	687	20.3159	647	20.3159	616
	20.3326	681	20.3326	629	20.3326	690	20.3326	616	20.3326	649	20.3326	682	20.3326	627
	20.3493	644	20.3493	591	20.3493	619	20.3493	645	20.3493	659	20.3493	700	20.3493	622
	20.366	648	20.366	597	20.366	691	20.366	659	20.366	641	20.366	642	20.366	597
	20.3828	635	20.3828	616	20.3828	645	20.3828	647	20.3828	659	20.3828	627	20.3828	613
	20.3995	610	20.3995	558	20.3995	685	20.3995	643	20.3995	641	20.3995	670	20.3995	654
	20.4162	606	20.4162	603	20.4162	627	20.4162	600	20.4162	609	20.4162	584	20.4162	603
	20.4329	566	20.4329	608	20.4329	674	20.4329	599	20.4329	670	20.4329	616	20.4329	616
	20.4496	654	20.4496	580	20.4496	599	20.4496	613	20.4496	672	20.4496	615	20.4496	581
	20.4663	628	20.4663	644	20.4663	633	20.4663	615	20.4663	605	20.4663	641	20.4663	662
	20.483	595	20.483	618	20.483	644	20.483	604	20.483	642	20.483	632	20.483	593
	20.4997	609	20.4997	601	20.4997	647	20.4997	591	20.4997	666	20.4997	670	20.4997	608
	20.5164	600	20.5164	617	20.5164	658	20.5164	615	20.5164	657	20.5164	605	20.5164	629
	20.5331	624	20.5331	658	20.5331	603	20.5331	621	20.5331	691	20.5331	639	20.5331	600
	20.5499	617	20.5499	635	20.5499	641	20.5499	580	20.5499	642	20.5499	617	20.5499	618
	20.5666	641	20.5666	681	20.5666	662	20.5666	624	20.5666	613	20.5666	659	20.5666	591
	20.5833	655	20.5833	645	20.5833	606	20.5833	560	20.5833	644	20.5833	595	20.5833	609
	20.6	561	20.6	625	20.6	628	20.6	563	20.6	568	20.6	659	20.6	625
	20.6167	631	20.6167	674	20.6167	619	20.6167	594	20.6167	668	20.6167	623	20.6167	564
	20.6334	648	20.6334	604	20.6334	622	20.6334	640	20.6334	647	20.6334	599	20.6334	600
	20.6501	624	20.6501	601	20.6501	652	20.6501	605	20.6501	638	20.6501	651	20.6501	623
	20.6668	658	20.6668	572	20.6668	607	20.6668	649	20.6668	638	20.6668	661	20.6668	603
	20.6836	608	20.6836	628	20.6836	594	20.6836	596	20.6836	640	20.6836	647	20.6836	610
	20.7003	624	20.7003	601	20.7003	572	20.7003	631	20.7003	678	20.7003	611	20.7003	616
	20.717	600	20.717	570	20.717	558	20.717	576	20.717	657	20.717	625	20.717	601
	20.7337	618	20.7337	575	20.7337	597	20.7337	597	20.7337	603	20.7337	623	20.7337	579
	20.7504	587	20.7504	652	20.7504	581	20.7504	592	20.7504	655	20.7504	582	20.7504	619
	20.7671	582	20.7671	577	20.7671	672	20.7671	590	20.7671	636	20.7671	661	20.7671	591
	20.7838	632	20.7838	555	20.7838	599	20.7838	606	20.7838	662	20.7838	672	20.7838	592
	20.8005	586	20.8005	572	20.8005	599	20.8005	591	20.8005	633	20.8005	600	20.8005	590
	20.8173	594	20.8173	594	20.8173	633	20.8173	594	20.8173	655	20.8173	619	20.8173	605
	20.834	574	20.834	589	20.834	642	20.834	594	20.834	619	20.834	656	20.834	614
	20.8507	597	20.8507	588	20.8507	623	20.8507	546	20.8507	641	20.8507	619	20.8507	570
	20.8674	650	20.8674	629	20.8674	614	20.8674	573	20.8674	660	20.8674	624	20.8674	578
	20.8841	639	20.8841	633	20.8841	576	20.8841	549	20.8841	618	20.8841	603	20.8841	609
	20.9008	592	20.9008	645	20.9008	606	20.9008	550	20.9008	651	20.9008	600	20.9008	624
	20.9175	640	20.9175	758	20.9175	583	20.9175	601	20.9175	677	20.9175	613	20.9175	588
	20.9342	634	20.9342	729	20.9342	580	20.9342	607	20.9342	632	20.9342	631	20.9342	634
	20.9509	583	20.9509	767	20.9509	585	20.9509	562	20.9509	628	20.9509	665	20.9509	573
	20.9676	621	20.9676	737	20.9676	578	20.9676	580	20.9676	648	20.9676	637	20.9676	619
	20.9844	613	20.9844	756	20.9844	567	20.9844	609	20.9844	621	20.9844	643	20.9844	574
	21.0011	627	21.0011	698	21.0011	570	21.0011	554	21.0011	663	21.0011	629	21.0011	608
	21.0178	634	21.0178	708	21.0178	642	21.0178	597	21.0178	618	21.0178	609	21.0178	587
	21.0345	621	21.0345	704	21.0345	623	21.0345	582	21.0345	588	21.0345	652	21.0345	647
	21.0512	665	21.0512	657	21.0512	552	21.0512	564	21.0512	606	21.0512	578	21.0512	614
	21.0679	660	21.0679	644	21.0679	551	21.0679	562	21.0679	621	21.0679	650	21.0679	608
	21.0846	612	21.0846	588	21.0846	620	21.0846	579	21.0846	682	21.0846	583	21.0846	612
	21.1013	620	21.1013	585	21.1013	600	21.1013	612	21.1013	635	21.1013	622	21.1013	606
	21.1181	628	21.1181	559	21.1181	619	21.1181	569	21.1181	684	21.1181	637	21.1181	623
	21.1348	693	21.1348	593	21.1348	601	21.1348	593	21.1348	660	21.1348	591	21.1348	682
	21.1515	665	21.1515	611	21.1515	605	21.1515	550	21.1515	675	21.1515	635	21.1515	658
	21.1682	665	21.1682	570	21.1682	594	21.1682	615	21.1682	661	21.1682	676	21.1682	622
	21.1849	610	21.1849	596	21.1849	642	21.1849	602	21.1849	635	21.1849	681	21.1849	649
	21.2016	601	21.2016	548	21.2016	599	21.2016	620	21.2016	631	21.2016	617	21.2016	642
	21.2183	617	21.2183	566	21.2183	640	21.2183	593	21.2183	623	21.2183	622	21.2183	691
	21.235	646	21.235	521	21.235	646	21.235	628	21.235	634	21.235	664	21.235	666
	21.2517	586	21.2517	600	21.2517	637	21.2517	660	21.2517	609	21.2517	627	21.2517	647
	21.2685	597	21.2685	603	21.2685	684	21.2685	643	21.2685	641	21.2685	706	21.2685	724
	21.2852	654	21.2852	588	21.2852	717	21.2852	650	21.2852	696	21.2852	719	21.2852	703
	21.3019	613	21.3019	542	21.3019	663	21.3019	632	21.3019	660	21.3019	665	21.3019	704
	21.3186	592	21.3186	574	21.3186	681	21.3186	628	21.3186	674	21.3186	676	21.3186	718
	21.3353	668	21.3353	589	21.3353	683	21.3353	591	21.3353	644	21.3353	703	21.3353	677
	21.352	650	21.352	590	21.352	671	21.352	581	21.352	698	21.352	655	21.352	674
	21.3687	682	21.3687	554	21.3687	627	21.3687	604	21.3687	667	21.3687	702	21.3687	718
	21.3854	660	21.3854	548	21.3854	682	21.3854	572	21.3854	660	21.3854	646	21.3854	685
	21.4021	625	21.4021	649	21.4021	632	21.4021	603	21.4021	629	21.4021	631	21.4021	732
	21.4188	638	21.4188	551	21.4188	615	21.4188	631	21.4188	736	21.4188	675	21.4188	779
	21.4356	684	21.4356	550	21.4356	620	21.4356	558	21.4356	713	21.4356	625	21.4356	800
	21.4523	616	21.4523	621	21.4523	560	21.4523	611	21.4523	607	21.4523	656	21.4523	819
	21.469	613	21.469	599	21.469	636	21.469	596	21.469	669	21.469	651	21.469	813
	21.4857	630	21.4857	592	21.4857	581	21.4857	619	21.4857	666	21.4857	644	21.4857	928
	21.5024	650	21.5024	619	21.5024	594	21.5024	590	21.5024	712	21.5024	647	21.5024	880
	21.5191	637	21.5191	581	21.5191	608	21.5191	574	21.5191	681	21.5191	721	21.5191	922
	21.5358	676	21.5358	604	21.5358	616	21.5358	606	21.5358	687	21.5358	682	21.5358	973
	21.5525	655	21.5525	592	21.5525	585	21.5525	600	21.5525	750	21.5525	751	21.5525	1048
	21.5693	699	21.5693	584	21.5693	584	21.5693	611	21.5693	673	21.5693	722	21.5693	1159
	21.586	639	21.586	634	21.586	623	21.586	591	21.586	692	21.586	808	21.586	1169
	21.6027	662	21.6027	692	21.6027	627	21.6027	615	21.6027	649	21.6027	723	21.6027	1267
	21.6194	709	21.6194	648	21.6194	677	21.6194	583	21.6194	681	21.6194	772	21.6194	1282
	21.6361	749	21.6361	625	21.6361	631	21.6361	608	21.6361	688	21.6361	751	21.6361	1318
	21.6528	693	21.6528	686	21.6528	620	21.6528	594	21.6528	637	21.6528	734	21.6528	1349
	21.6695	800	21.6695	678	21.6695	611	21.6695	633	21.6695	663	21.6695	753	21.6695	1461
	21.6862	751	21.6862	675	21.6862	630	21.6862	634	21.6862	637	21.6862	695	21.6862	1556
	21.7029	785	21.7029	614	21.7029	658	21.7029	622	21.7029	681	21.7029	686	21.7029	1609
	21.7197	773	21.7197	668	21.7197	642	21.7197	619	21.7197	716	21.7197	669	21.7197	1719
	21.7364	870	21.7364	634	21.7364	624	21.7364	620	21.7364	651	21.7364	712	21.7364	1872
	21.7531	768	21.7531	587	21.7531	607	21.7531	623	21.7531	691	21.7531	689	21.7531	1939
	21.7698	791	21.7698	628	21.7698	603	21.7698	624	21.7698	665	21.7698	741	21.7698	1859
	21.7865	760	21.7865	618	21.7865	663	21.7865	616	21.7865	645	21.7865	650	21.7865	1738
	21.8032	807	21.8032	629	21.8032	604	21.8032	592	21.8032	721	21.8032	648	21.8032	1615
	21.8199	712	21.8199	656	21.8199	624	21.8199	608	21.8199	691	21.8199	675	21.8199	1405
	21.8366	693	21.8366	647	21.8366	605	21.8366	624	21.8366	702	21.8366	652	21.8366	1209
	21.8533	702	21.8533	703	21.8533	638	21.8533	591	21.8533	624	21.8533	645	21.8533	1057
	21.8701	687	21.8701	695	21.8701	593	21.8701	634	21.8701	669	21.8701	652	21.8701	880
	21.8868	636	21.8868	720	21.8868	631	21.8868	600	21.8868	630	21.8868	679	21.8868	866
	21.9035	652	21.9035	705	21.9035	658	21.9035	627	21.9035	677	21.9035	662	21.9035	795
	21.9202	716	21.9202	751	21.9202	690	21.9202	617	21.9202	637	21.9202	673	21.9202	822
	21.9369	639	21.9369	658	21.9369	654	21.9369	603	21.9369	662	21.9369	660	21.9369	774
	21.9536	683	21.9536	648	21.9536	709	21.9536	645	21.9536	667	21.9536	693	21.9536	746
	21.9703	634	21.9703	643	21.9703	689	21.9703	663	21.9703	646	21.9703	671	21.9703	788
	21.987	655	21.987	590	21.987	754	21.987	700	21.987	691	21.987	672	21.987	757
	22.0038	643	22.0038	614	22.0038	700	22.0038	701	22.0038	708	22.0038	766	22.0038	722
	22.0205	663	22.0205	632	22.0205	720	22.0205	739	22.0205	713	22.0205	694	22.0205	705
	22.0372	629	22.0372	566	22.0372	686	22.0372	734	22.0372	681	22.0372	714	22.0372	748
	22.0539	724	22.0539	610	22.0539	755	22.0539	732	22.0539	716	22.0539	743	22.0539	691
	22.0706	644	22.0706	601	22.0706	731	22.0706	692	22.0706	748	22.0706	757	22.0706	698
	22.0873	656	22.0873	638	22.0873	724	22.0873	722	22.0873	797	22.0873	773	22.0873	742
	22.104	681	22.104	634	22.104	694	22.104	703	22.104	766	22.104	743	22.104	737
	22.1207	671	22.1207	591	22.1207	703	22.1207	694	22.1207	747	22.1207	791	22.1207	749
	22.1374	670	22.1374	628	22.1374	658	22.1374	687	22.1374	750	22.1374	737	22.1374	738
	22.1542	706	22.1542	602	22.1542	688	22.1542	601	22.1542	765	22.1542	808	22.1542	752
	22.1709	638	22.1709	579	22.1709	681	22.1709	696	22.1709	835	22.1709	782	22.1709	750
	22.1876	705	22.1876	604	22.1876	717	22.1876	767	22.1876	854	22.1876	795	22.1876	793
	22.2043	706	22.2043	584	22.2043	675	22.2043	656	22.2043	860	22.2043	861	22.2043	810
	22.221	733	22.221	657	22.221	694	22.221	632	22.221	840	22.221	869	22.221	891
	22.2377	761	22.2377	575	22.2377	739	22.2377	689	22.2377	845	22.2377	904	22.2377	899
	22.2544	756	22.2544	578	22.2544	724	22.2544	734	22.2544	861	22.2544	983	22.2544	954
	22.2711	782	22.2711	586	22.2711	743	22.2711	677	22.2711	926	22.2711	941	22.2711	988
	22.2878	780	22.2878	631	22.2878	700	22.2878	724	22.2878	944	22.2878	972	22.2878	1017
	22.3045	805	22.3045	588	22.3045	766	22.3045	753	22.3045	921	22.3045	1090	22.3045	1063
	22.3213	881	22.3213	645	22.3213	760	22.3213	775	22.3213	915	22.3213	1162	22.3213	1077
	22.338	876	22.338	639	22.338	835	22.338	809	22.338	1004	22.338	1192	22.338	1077
	22.3547	920	22.3547	572	22.3547	788	22.3547	815	22.3547	1020	22.3547	1218	22.3547	1186
	22.3714	948	22.3714	631	22.3714	838	22.3714	784	22.3714	1058	22.3714	1345	22.3714	1245
	22.3881	996	22.3881	632	22.3881	811	22.3881	764	22.3881	1067	22.3881	1241	22.3881	1291
	22.4048	921	22.4048	621	22.4048	804	22.4048	781	22.4048	1110	22.4048	1301	22.4048	1182
	22.4215	926	22.4215	656	22.4215	811	22.4215	779	22.4215	1069	22.4215	1402	22.4215	1275
	22.4382	937	22.4382	640	22.4382	741	22.4382	722	22.4382	1152	22.4382	1324	22.4382	1308
	22.455	973	22.455	597	22.455	744	22.455	684	22.455	1126	22.455	1330	22.455	1349
	22.4717	968	22.4717	588	22.4717	786	22.4717	720	22.4717	1150	22.4717	1288	22.4717	1310
	22.4884	882	22.4884	621	22.4884	749	22.4884	717	22.4884	1228	22.4884	1346	22.4884	1327
	22.5051	853	22.5051	608	22.5051	750	22.5051	703	22.5051	1082	22.5051	1373	22.5051	1244
	22.5218	868	22.5218	648	22.5218	752	22.5218	662	22.5218	1175	22.5218	1221	22.5218	1253
	22.5385	811	22.5385	590	22.5385	696	22.5385	692	22.5385	1122	22.5385	1262	22.5385	1216
	22.5552	867	22.5552	615	22.5552	719	22.5552	641	22.5552	1145	22.5552	1239	22.5552	1163
	22.5719	894	22.5719	686	22.5719	716	22.5719	652	22.5719	1206	22.5719	1206	22.5719	1187
	22.5886	909	22.5886	642	22.5886	691	22.5886	656	22.5886	1172	22.5886	1206	22.5886	1220
	22.6054	886	22.6054	636	22.6054	709	22.6054	667	22.6054	1130	22.6054	1176	22.6054	1160
	22.6221	831	22.6221	639	22.6221	662	22.6221	630	22.6221	1193	22.6221	1179	22.6221	1213
	22.6388	770	22.6388	659	22.6388	637	22.6388	613	22.6388	1171	22.6388	1173	22.6388	1232
	22.6555	827	22.6555	714	22.6555	652	22.6555	656	22.6555	1153	22.6555	1092	22.6555	1172
	22.6722	825	22.6722	720	22.6722	690	22.6722	678	22.6722	1204	22.6722	1155	22.6722	1203
	22.6889	796	22.6889	767	22.6889	700	22.6889	628	22.6889	1127	22.6889	1128	22.6889	1121
	22.7056	793	22.7056	877	22.7056	650	22.7056	636	22.7056	1123	22.7056	1111	22.7056	1150
	22.7223	803	22.7223	996	22.7223	637	22.7223	664	22.7223	1113	22.7223	1120	22.7223	1105
	22.739	827	22.739	1072	22.739	657	22.739	650	22.739	1115	22.739	1119	22.739	1142
	22.7557	785	22.7557	1150	22.7557	630	22.7557	603	22.7557	1066	22.7557	1086	22.7557	1074
	22.7725	835	22.7725	1158	22.7725	682	22.7725	638	22.7725	1077	22.7725	1042	22.7725	1120
	22.7892	802	22.7892	1068	22.7892	657	22.7892	618	22.7892	1074	22.7892	1097	22.7892	988
	22.8059	854	22.8059	1045	22.8059	644	22.8059	634	22.8059	1135	22.8059	1049	22.8059	1071
	22.8226	818	22.8226	920	22.8226	621	22.8226	646	22.8226	1057	22.8226	1021	22.8226	1075
	22.8393	855	22.8393	833	22.8393	609	22.8393	635	22.8393	1093	22.8393	986	22.8393	1041
	22.856	834	22.856	742	22.856	639	22.856	646	22.856	1102	22.856	1022	22.856	1046
	22.8727	798	22.8727	694	22.8727	628	22.8727	587	22.8727	1112	22.8727	1068	22.8727	1042
	22.8894	800	22.8894	693	22.8894	609	22.8894	628	22.8894	1134	22.8894	1016	22.8894	1073
	22.9062	772	22.9062	677	22.9062	610	22.9062	599	22.9062	1025	22.9062	1045	22.9062	1059
	22.9229	758	22.9229	627	22.9229	644	22.9229	619	22.9229	1021	22.9229	974	22.9229	1050
	22.9396	742	22.9396	589	22.9396	635	22.9396	601	22.9396	1086	22.9396	1030	22.9396	996
	22.9563	768	22.9563	624	22.9563	682	22.9563	586	22.9563	1027	22.9563	1008	22.9563	1040
	22.973	744	22.973	600	22.973	605	22.973	606	22.973	1066	22.973	970	22.973	1022
	22.9897	744	22.9897	602	22.9897	652	22.9897	644	22.9897	1027	22.9897	994	22.9897	950
	23.0064	711	23.0064	536	23.0064	610	23.0064	583	23.0064	1043	23.0064	901	23.0064	972
	23.0231	721	23.0231	589	23.0231	592	23.0231	593	23.0231	1021	23.0231	931	23.0231	922
	23.0398	731	23.0398	592	23.0398	661	23.0398	595	23.0398	1053	23.0398	956	23.0398	968
	23.0566	732	23.0566	567	23.0566	576	23.0566	611	23.0566	949	23.0566	976	23.0566	905
	23.0733	724	23.0733	558	23.0733	607	23.0733	633	23.0733	1013	23.0733	961	23.0733	889
	23.09	685	23.09	543	23.09	647	23.09	627	23.09	1006	23.09	960	23.09	913
	23.1067	729	23.1067	520	23.1067	652	23.1067	580	23.1067	956	23.1067	888	23.1067	919
	23.1234	738	23.1234	609	23.1234	662	23.1234	583	23.1234	972	23.1234	928	23.1234	897
	23.1401	713	23.1401	563	23.1401	631	23.1401	549	23.1401	996	23.1401	958	23.1401	930
	23.1568	679	23.1568	542	23.1568	594	23.1568	588	23.1568	1015	23.1568	919	23.1568	894
	23.1735	674	23.1735	566	23.1735	669	23.1735	583	23.1735	974	23.1735	930	23.1735	913
	23.1902	754	23.1902	561	23.1902	625	23.1902	593	23.1902	966	23.1902	825	23.1902	922
	23.207	726	23.207	548	23.207	570	23.207	578	23.207	1016	23.207	901	23.207	957
	23.2237	745	23.2237	580	23.2237	631	23.2237	570	23.2237	933	23.2237	880	23.2237	893
	23.2404	696	23.2404	588	23.2404	623	23.2404	584	23.2404	1008	23.2404	864	23.2404	882
	23.2571	697	23.2571	534	23.2571	631	23.2571	573	23.2571	962	23.2571	854	23.2571	905
	23.2738	709	23.2738	586	23.2738	613	23.2738	577	23.2738	961	23.2738	902	23.2738	919
	23.2905	734	23.2905	548	23.2905	588	23.2905	559	23.2905	974	23.2905	869	23.2905	860
	23.3072	709	23.3072	562	23.3072	656	23.3072	575	23.3072	928	23.3072	872	23.3072	888
	23.3239	697	23.3239	590	23.3239	582	23.3239	586	23.3239	950	23.3239	833	23.3239	885
	23.3407	712	23.3407	541	23.3407	618	23.3407	570	23.3407	951	23.3407	848	23.3407	887
	23.3574	677	23.3574	520	23.3574	638	23.3574	573	23.3574	930	23.3574	811	23.3574	873
	23.3741	685	23.3741	540	23.3741	615	23.3741	603	23.3741	874	23.3741	849	23.3741	864
	23.3908	665	23.3908	535	23.3908	561	23.3908	566	23.3908	946	23.3908	867	23.3908	886
	23.4075	743	23.4075	562	23.4075	541	23.4075	562	23.4075	972	23.4075	891	23.4075	841
	23.4242	679	23.4242	518	23.4242	608	23.4242	572	23.4242	879	23.4242	866	23.4242	836
	23.4409	705	23.4409	556	23.4409	609	23.4409	562	23.4409	891	23.4409	863	23.4409	868
	23.4576	682	23.4576	497	23.4576	572	23.4576	587	23.4576	964	23.4576	810	23.4576	848
	23.4743	708	23.4743	530	23.4743	595	23.4743	599	23.4743	930	23.4743	812	23.4743	837
	23.4911	666	23.4911	537	23.4911	639	23.4911	585	23.4911	889	23.4911	872	23.4911	854
	23.5078	694	23.5078	529	23.5078	588	23.5078	580	23.5078	954	23.5078	807	23.5078	840
	23.5245	655	23.5245	548	23.5245	581	23.5245	594	23.5245	895	23.5245	847	23.5245	769
	23.5412	689	23.5412	568	23.5412	633	23.5412	551	23.5412	931	23.5412	834	23.5412	887
	23.5579	679	23.5579	572	23.5579	607	23.5579	552	23.5579	892	23.5579	773	23.5579	806
	23.5746	642	23.5746	554	23.5746	576	23.5746	555	23.5746	904	23.5746	854	23.5746	827
	23.5913	668	23.5913	560	23.5913	575	23.5913	514	23.5913	847	23.5913	840	23.5913	804
	23.608	665	23.608	563	23.608	556	23.608	570	23.608	918	23.608	823	23.608	830
	23.6247	637	23.6247	518	23.6247	652	23.6247	610	23.6247	945	23.6247	755	23.6247	775
	23.6414	651	23.6414	492	23.6414	561	23.6414	609	23.6414	922	23.6414	822	23.6414	811
	23.6582	640	23.6582	514	23.6582	600	23.6582	630	23.6582	897	23.6582	842	23.6582	825
	23.6749	652	23.6749	519	23.6749	584	23.6749	560	23.6749	814	23.6749	822	23.6749	787
	23.6916	661	23.6916	538	23.6916	617	23.6916	611	23.6916	875	23.6916	821	23.6916	832
	23.7083	660	23.7083	536	23.7083	567	23.7083	594	23.7083	841	23.7083	802	23.7083	751
	23.725	646	23.725	536	23.725	609	23.725	551	23.725	863	23.725	809	23.725	777
	23.7417	629	23.7417	527	23.7417	611	23.7417	581	23.7417	954	23.7417	795	23.7417	769
	23.7584	706	23.7584	546	23.7584	609	23.7584	602	23.7584	868	23.7584	845	23.7584	725
	23.7751	679	23.7751	546	23.7751	611	23.7751	526	23.7751	862	23.7751	784	23.7751	822
	23.7919	687	23.7919	567	23.7919	618	23.7919	558	23.7919	865	23.7919	805	23.7919	804
	23.8086	667	23.8086	507	23.8086	603	23.8086	616	23.8086	901	23.8086	774	23.8086	779
	23.8253	614	23.8253	573	23.8253	619	23.8253	588	23.8253	864	23.8253	851	23.8253	827
	23.842	651	23.842	516	23.842	616	23.842	600	23.842	844	23.842	808	23.842	781
	23.8587	647	23.8587	565	23.8587	630	23.8587	638	23.8587	878	23.8587	779	23.8587	745
	23.8754	664	23.8754	499	23.8754	638	23.8754	635	23.8754	862	23.8754	786	23.8754	769
	23.8921	620	23.8921	549	23.8921	560	23.8921	614	23.8921	851	23.8921	792	23.8921	765
	23.9088	695	23.9088	487	23.9088	650	23.9088	655	23.9088	799	23.9088	802	23.9088	787
	23.9255	645	23.9255	534	23.9255	638	23.9255	617	23.9255	891	23.9255	820	23.9255	779
	23.9423	647	23.9423	520	23.9423	660	23.9423	648	23.9423	827	23.9423	788	23.9423	732
	23.959	665	23.959	556	23.959	650	23.959	645	23.959	912	23.959	807	23.959	769
	23.9757	658	23.9757	474	23.9757	608	23.9757	582	23.9757	845	23.9757	794	23.9757	764
	23.9924	660	23.9924	510	23.9924	632	23.9924	628	23.9924	829	23.9924	832	23.9924	806
	24.0091	676	24.0091	553	24.0091	627	24.0091	582	24.0091	840	24.0091	794	24.0091	817
	24.0258	661	24.0258	494	24.0258	604	24.0258	620	24.0258	824	24.0258	809	24.0258	716
	24.0425	641	24.0425	559	24.0425	675	24.0425	644	24.0425	810	24.0425	768	24.0425	787
	24.0592	658	24.0592	536	24.0592	651	24.0592	578	24.0592	831	24.0592	800	24.0592	691
	24.0759	596	24.0759	534	24.0759	624	24.0759	628	24.0759	839	24.0759	781	24.0759	758
	24.0926	568	24.0926	551	24.0926	650	24.0926	629	24.0926	842	24.0926	778	24.0926	776
	24.1094	661	24.1094	546	24.1094	639	24.1094	592	24.1094	864	24.1094	792	24.1094	804
	24.1261	617	24.1261	526	24.1261	650	24.1261	606	24.1261	853	24.1261	855	24.1261	752
	24.1428	630	24.1428	532	24.1428	625	24.1428	649	24.1428	815	24.1428	743	24.1428	780
	24.1595	606	24.1595	533	24.1595	659	24.1595	650	24.1595	834	24.1595	752	24.1595	780
	24.1762	616	24.1762	533	24.1762	647	24.1762	652	24.1762	793	24.1762	751	24.1762	751
	24.1929	610	24.1929	566	24.1929	640	24.1929	628	24.1929	829	24.1929	841	24.1929	719
	24.2096	639	24.2096	533	24.2096	631	24.2096	661	24.2096	771	24.2096	807	24.2096	751
	24.2263	605	24.2263	498	24.2263	664	24.2263	639	24.2263	781	24.2263	786	24.2263	759
	24.2431	604	24.2431	524	24.2431	699	24.2431	657	24.2431	850	24.2431	764	24.2431	720
	24.2598	659	24.2598	577	24.2598	679	24.2598	597	24.2598	835	24.2598	728	24.2598	791
	24.2765	666	24.2765	560	24.2765	638	24.2765	612	24.2765	827	24.2765	817	24.2765	749
	24.2932	649	24.2932	550	24.2932	648	24.2932	660	24.2932	810	24.2932	767	24.2932	809
	24.3099	627	24.3099	560	24.3099	666	24.3099	586	24.3099	822	24.3099	768	24.3099	738
	24.3266	585	24.3266	587	24.3266	671	24.3266	599	24.3266	819	24.3266	798	24.3266	764
	24.3433	659	24.3433	585	24.3433	663	24.3433	615	24.3433	838	24.3433	766	24.3433	785
	24.36	640	24.36	631	24.36	674	24.36	599	24.36	801	24.36	763	24.36	783
	24.3768	690	24.3768	708	24.3768	610	24.3768	618	24.3768	799	24.3768	782	24.3768	734
	24.3935	594	24.3935	722	24.3935	631	24.3935	630	24.3935	821	24.3935	756	24.3935	783
	24.4102	625	24.4102	711	24.4102	670	24.4102	643	24.4102	776	24.4102	718	24.4102	757
	24.4269	596	24.4269	757	24.4269	700	24.4269	611	24.4269	820	24.4269	773	24.4269	777
	24.4436	619	24.4436	745	24.4436	648	24.4436	593	24.4436	850	24.4436	763	24.4436	761
	24.4603	643	24.4603	794	24.4603	654	24.4603	627	24.4603	783	24.4603	750	24.4603	746
	24.477	684	24.477	780	24.477	687	24.477	605	24.477	779	24.477	748	24.477	755
	24.4937	642	24.4937	710	24.4937	701	24.4937	614	24.4937	787	24.4937	774	24.4937	749
	24.5104	649	24.5104	741	24.5104	678	24.5104	572	24.5104	750	24.5104	754	24.5104	738
	24.5271	613	24.5271	645	24.5271	623	24.5271	603	24.5271	823	24.5271	757	24.5271	806
	24.5439	659	24.5439	633	24.5439	648	24.5439	539	24.5439	793	24.5439	780	24.5439	746
	24.5606	596	24.5606	638	24.5606	612	24.5606	585	24.5606	777	24.5606	775	24.5606	721
	24.5773	618	24.5773	587	24.5773	611	24.5773	589	24.5773	777	24.5773	763	24.5773	743
	24.594	638	24.594	605	24.594	641	24.594	593	24.594	780	24.594	747	24.594	747
	24.6107	599	24.6107	557	24.6107	641	24.6107	622	24.6107	802	24.6107	792	24.6107	734
	24.6274	619	24.6274	553	24.6274	581	24.6274	580	24.6274	790	24.6274	759	24.6274	705
	24.6441	671	24.6441	564	24.6441	569	24.6441	568	24.6441	806	24.6441	776	24.6441	734
	24.6608	638	24.6608	535	24.6608	606	24.6608	604	24.6608	830	24.6608	748	24.6608	733
	24.6776	641	24.6776	534	24.6776	631	24.6776	614	24.6776	798	24.6776	732	24.6776	763
	24.6943	644	24.6943	566	24.6943	553	24.6943	581	24.6943	739	24.6943	751	24.6943	737
	24.711	591	24.711	574	24.711	582	24.711	557	24.711	754	24.711	755	24.711	682
	24.7277	679	24.7277	535	24.7277	601	24.7277	580	24.7277	803	24.7277	749	24.7277	734
	24.7444	617	24.7444	535	24.7444	635	24.7444	553	24.7444	830	24.7444	758	24.7444	733
	24.7611	537	24.7611	557	24.7611	600	24.7611	591	24.7611	738	24.7611	773	24.7611	729
	24.7778	608	24.7778	516	24.7778	632	24.7778	526	24.7778	767	24.7778	740	24.7778	662
	24.7945	555	24.7945	530	24.7945	560	24.7945	545	24.7945	799	24.7945	736	24.7945	692
	24.8112	644	24.8112	540	24.8112	609	24.8112	605	24.8112	826	24.8112	725	24.8112	747
	24.828	607	24.828	534	24.828	609	24.828	532	24.828	800	24.828	741	24.828	727
	24.8447	591	24.8447	533	24.8447	606	24.8447	592	24.8447	744	24.8447	779	24.8447	703
	24.8614	590	24.8614	553	24.8614	621	24.8614	575	24.8614	724	24.8614	728	24.8614	728
	24.8781	611	24.8781	540	24.8781	589	24.8781	541	24.8781	770	24.8781	736	24.8781	690
	24.8948	575	24.8948	553	24.8948	633	24.8948	574	24.8948	785	24.8948	714	24.8948	724
	24.9115	643	24.9115	500	24.9115	587	24.9115	529	24.9115	808	24.9115	766	24.9115	675
	24.9282	606	24.9282	499	24.9282	604	24.9282	539	24.9282	763	24.9282	766	24.9282	737
	24.9449	633	24.9449	563	24.9449	578	24.9449	552	24.9449	728	24.9449	728	24.9449	708
	24.9616	587	24.9616	509	24.9616	584	24.9616	562	24.9616	787	24.9616	713	24.9616	676
	24.9783	587	24.9783	563	24.9783	590	24.9783	568	24.9783	771	24.9783	694	24.9783	717
	24.9951	606	24.9951	507	24.9951	616	24.9951	582	24.9951	779	24.9951	741	24.9951	690
	25.0118	623	25.0118	525	25.0118	620	25.0118	609	25.0118	692	25.0118	784	25.0118	731
	25.0285	642	25.0285	520	25.0285	618	25.0285	580	25.0285	752	25.0285	751	25.0285	744
	25.0452	620	25.0452	526	25.0452	553	25.0452	567	25.0452	751	25.0452	751	25.0452	697
	25.0619	569	25.0619	489	25.0619	572	25.0619	555	25.0619	718	25.0619	683	25.0619	697
	25.0786	618	25.0786	531	25.0786	600	25.0786	533	25.0786	761	25.0786	748	25.0786	674
	25.0953	618	25.0953	496	25.0953	574	25.0953	542	25.0953	758	25.0953	714	25.0953	718
	25.112	611	25.112	531	25.112	628	25.112	581	25.112	748	25.112	722	25.112	671
	25.1288	599	25.1288	510	25.1288	627	25.1288	578	25.1288	744	25.1288	746	25.1288	644
	25.1455	577	25.1455	540	25.1455	559	25.1455	551	25.1455	724	25.1455	699	25.1455	700
	25.1622	614	25.1622	527	25.1622	563	25.1622	575	25.1622	747	25.1622	715	25.1622	689
	25.1789	596	25.1789	493	25.1789	558	25.1789	503	25.1789	732	25.1789	726	25.1789	675
	25.1956	603	25.1956	516	25.1956	609	25.1956	552	25.1956	758	25.1956	705	25.1956	661
	25.2123	567	25.2123	502	25.2123	589	25.2123	559	25.2123	713	25.2123	704	25.2123	685
	25.229	625	25.229	554	25.229	583	25.229	560	25.229	768	25.229	690	25.229	686
	25.2457	602	25.2457	558	25.2457	558	25.2457	542	25.2457	773	25.2457	662	25.2457	668
	25.2624	606	25.2624	523	25.2624	581	25.2624	597	25.2624	770	25.2624	684	25.2624	693
	25.2792	597	25.2792	507	25.2792	580	25.2792	534	25.2792	795	25.2792	708	25.2792	664
	25.2959	581	25.2959	486	25.2959	564	25.2959	584	25.2959	733	25.2959	718	25.2959	715
	25.3126	560	25.3126	543	25.3126	597	25.3126	516	25.3126	740	25.3126	694	25.3126	715
	25.3293	594	25.3293	502	25.3293	616	25.3293	546	25.3293	744	25.3293	701	25.3293	700
	25.346	569	25.346	533	25.346	563	25.346	519	25.346	673	25.346	696	25.346	706
	25.3627	557	25.3627	545	25.3627	580	25.3627	513	25.3627	673	25.3627	740	25.3627	661
	25.3794	589	25.3794	512	25.3794	541	25.3794	579	25.3794	776	25.3794	723	25.3794	722
	25.3961	565	25.3961	537	25.3961	567	25.3961	593	25.3961	718	25.3961	701	25.3961	687
	25.4128	574	25.4128	521	25.4128	492	25.4128	565	25.4128	763	25.4128	740	25.4128	687
	25.4296	554	25.4296	579	25.4296	523	25.4296	506	25.4296	686	25.4296	667	25.4296	701
	25.4463	611	25.4463	565	25.4463	623	25.4463	558	25.4463	777	25.4463	732	25.4463	659
	25.463	610	25.463	616	25.463	645	25.463	554	25.463	706	25.463	699	25.463	660
	25.4797	605	25.4797	623	25.4797	592	25.4797	543	25.4797	790	25.4797	703	25.4797	657
	25.4964	590	25.4964	732	25.4964	562	25.4964	568	25.4964	725	25.4964	718	25.4964	691
	25.5131	610	25.5131	723	25.5131	549	25.5131	537	25.5131	725	25.5131	717	25.5131	715
	25.5298	604	25.5298	783	25.5298	536	25.5298	562	25.5298	752	25.5298	666	25.5298	702
	25.5465	604	25.5465	858	25.5465	612	25.5465	542	25.5465	720	25.5465	714	25.5465	649
	25.5633	595	25.5633	930	25.5633	585	25.5633	539	25.5633	785	25.5633	703	25.5633	702
	25.58	578	25.58	1138	25.58	557	25.58	532	25.58	728	25.58	702	25.58	661
	25.5967	557	25.5967	1410	25.5967	604	25.5967	551	25.5967	739	25.5967	662	25.5967	693
	25.6134	555	25.6134	1523	25.6134	538	25.6134	585	25.6134	772	25.6134	749	25.6134	703
	25.6301	636	25.6301	2021	25.6301	621	25.6301	526	25.6301	748	25.6301	718	25.6301	714
	25.6468	602	25.6468	2399	25.6468	570	25.6468	502	25.6468	723	25.6468	711	25.6468	670
	25.6635	621	25.6635	2726	25.6635	565	25.6635	528	25.6635	742	25.6635	676	25.6635	693
	25.6802	627	25.6802	2655	25.6802	570	25.6802	591	25.6802	781	25.6802	701	25.6802	699
	25.6969	579	25.6969	2293	25.6969	593	25.6969	542	25.6969	678	25.6969	713	25.6969	703
	25.7137	652	25.7137	1954	25.7137	589	25.7137	548	25.7137	722	25.7137	697	25.7137	672
	25.7304	622	25.7304	1571	25.7304	557	25.7304	582	25.7304	719	25.7304	717	25.7304	694
	25.7471	603	25.7471	1254	25.7471	603	25.7471	584	25.7471	727	25.7471	736	25.7471	687
	25.7638	600	25.7638	1028	25.7638	564	25.7638	582	25.7638	756	25.7638	672	25.7638	715
	25.7805	580	25.7805	877	25.7805	589	25.7805	567	25.7805	738	25.7805	746	25.7805	649
	25.7972	579	25.7972	725	25.7972	575	25.7972	579	25.7972	730	25.7972	702	25.7972	687
	25.8139	579	25.8139	694	25.8139	579	25.8139	551	25.8139	724	25.8139	722	25.8139	618
	25.8306	576	25.8306	611	25.8306	558	25.8306	563	25.8306	775	25.8306	719	25.8306	628
	25.8473	587	25.8473	623	25.8473	587	25.8473	545	25.8473	721	25.8473	676	25.8473	627
	25.864	554	25.864	582	25.864	607	25.864	561	25.864	711	25.864	697	25.864	692
	25.8808	592	25.8808	496	25.8808	593	25.8808	595	25.8808	702	25.8808	736	25.8808	675
	25.8975	550	25.8975	519	25.8975	599	25.8975	553	25.8975	703	25.8975	708	25.8975	705
	25.9142	577	25.9142	495	25.9142	590	25.9142	601	25.9142	729	25.9142	699	25.9142	667
	25.9309	589	25.9309	500	25.9309	597	25.9309	608	25.9309	734	25.9309	737	25.9309	691
	25.9476	587	25.9476	525	25.9476	589	25.9476	541	25.9476	713	25.9476	700	25.9476	645
	25.9643	595	25.9643	472	25.9643	585	25.9643	538	25.9643	687	25.9643	733	25.9643	716
	25.981	618	25.981	515	25.981	585	25.981	553	25.981	691	25.981	645	25.981	652
	25.9977	585	25.9977	542	25.9977	597	25.9977	561	25.9977	745	25.9977	672	25.9977	714
	26.0145	552	26.0145	518	26.0145	597	26.0145	539	26.0145	744	26.0145	694	26.0145	669
	26.0312	548	26.0312	508	26.0312	619	26.0312	529	26.0312	694	26.0312	688	26.0312	670
	26.0479	556	26.0479	489	26.0479	568	26.0479	540	26.0479	670	26.0479	689	26.0479	687
	26.0646	553	26.0646	527	26.0646	593	26.0646	510	26.0646	714	26.0646	704	26.0646	651
	26.0813	554	26.0813	474	26.0813	595	26.0813	557	26.0813	701	26.0813	727	26.0813	619
	26.098	534	26.098	443	26.098	572	26.098	524	26.098	690	26.098	644	26.098	587
	26.1147	557	26.1147	502	26.1147	552	26.1147	583	26.1147	717	26.1147	686	26.1147	624
	26.1314	601	26.1314	480	26.1314	600	26.1314	532	26.1314	732	26.1314	690	26.1314	646
	26.1481	582	26.1481	505	26.1481	587	26.1481	566	26.1481	695	26.1481	706	26.1481	663
	26.1649	553	26.1649	518	26.1649	581	26.1649	538	26.1649	727	26.1649	665	26.1649	617
	26.1816	564	26.1816	512	26.1816	601	26.1816	564	26.1816	702	26.1816	700	26.1816	666
	26.1983	596	26.1983	479	26.1983	574	26.1983	536	26.1983	720	26.1983	752	26.1983	676
	26.215	622	26.215	516	26.215	558	26.215	573	26.215	690	26.215	684	26.215	641
	26.2317	594	26.2317	433	26.2317	611	26.2317	561	26.2317	652	26.2317	681	26.2317	689
	26.2484	605	26.2484	470	26.2484	593	26.2484	604	26.2484	715	26.2484	721	26.2484	725
	26.2651	609	26.2651	471	26.2651	607	26.2651	610	26.2651	732	26.2651	690	26.2651	688
	26.2818	554	26.2818	485	26.2818	618	26.2818	565	26.2818	661	26.2818	670	26.2818	658
	26.2985	570	26.2985	498	26.2985	589	26.2985	594	26.2985	713	26.2985	663	26.2985	645
	26.3152	578	26.3152	487	26.3152	590	26.3152	596	26.3152	729	26.3152	736	26.3152	660
	26.332	553	26.332	522	26.332	605	26.332	604	26.332	713	26.332	711	26.332	663
	26.3487	555	26.3487	500	26.3487	579	26.3487	592	26.3487	734	26.3487	751	26.3487	649
	26.3654	612	26.3654	492	26.3654	619	26.3654	609	26.3654	749	26.3654	685	26.3654	684
	26.3821	589	26.3821	511	26.3821	594	26.3821	660	26.3821	698	26.3821	737	26.3821	660
	26.3988	565	26.3988	521	26.3988	716	26.3988	716	26.3988	693	26.3988	765	26.3988	657
	26.4155	667	26.4155	475	26.4155	649	26.4155	679	26.4155	695	26.4155	682	26.4155	683
	26.4322	635	26.4322	524	26.4322	787	26.4322	751	26.4322	748	26.4322	715	26.4322	622
	26.4489	631	26.4489	587	26.4489	826	26.4489	878	26.4489	770	26.4489	747	26.4489	737
	26.4657	649	26.4657	580	26.4657	892	26.4657	868	26.4657	725	26.4657	798	26.4657	682
	26.4824	720	26.4824	578	26.4824	923	26.4824	1067	26.4824	730	26.4824	706	26.4824	659
	26.4991	889	26.4991	632	26.4991	1109	26.4991	1201	26.4991	721	26.4991	695	26.4991	712
	26.5158	933	26.5158	699	26.5158	1317	26.5158	1380	26.5158	724	26.5158	711	26.5158	714
	26.5325	1071	26.5325	667	26.5325	1494	26.5325	1675	26.5325	722	26.5325	786	26.5325	722
	26.5492	1326	26.5492	674	26.5492	1847	26.5492	2071	26.5492	772	26.5492	778	26.5492	696
	26.5659	1392	26.5659	612	26.5659	2787	26.5659	2864	26.5659	877	26.5659	883	26.5659	712
	26.5826	1302	26.5826	599	26.5826	4190	26.5826	3192	26.5826	861	26.5826	986	26.5826	708
	26.5994	1370	26.5994	616	26.5994	5189	26.5994	3447	26.5994	987	26.5994	903	26.5994	708
	26.6161	1237	26.6161	616	26.6161	4981	26.6161	3242	26.6161	1004	26.6161	831	26.6161	741
	26.6328	1045	26.6328	590	26.6328	3818	26.6328	2605	26.6328	881	26.6328	849	26.6328	700
	26.6495	902	26.6495	607	26.6495	3317	26.6495	2101	26.6495	870	26.6495	809	26.6495	698
	26.6662	882	26.6662	648	26.6662	3055	26.6662	1913	26.6662	876	26.6662	844	26.6662	716
	26.6829	711	26.6829	614	26.6829	2063	26.6829	1450	26.6829	848	26.6829	734	26.6829	698
	26.6996	630	26.6996	569	26.6996	1259	26.6996	1029	26.6996	775	26.6996	752	26.6996	652
	26.7163	574	26.7163	640	26.7163	940	26.7163	795	26.7163	749	26.7163	733	26.7163	615
	26.733	603	26.733	583	26.733	809	26.733	669	26.733	685	26.733	705	26.733	606
	26.7497	628	26.7497	624	26.7497	755	26.7497	660	26.7497	722	26.7497	719	26.7497	690
	26.7665	580	26.7665	632	26.7665	720	26.7665	659	26.7665	711	26.7665	669	26.7665	678
	26.7832	543	26.7832	625	26.7832	687	26.7832	633	26.7832	704	26.7832	713	26.7832	677
	26.7999	583	26.7999	655	26.7999	600	26.7999	574	26.7999	688	26.7999	721	26.7999	672
	26.8166	613	26.8166	686	26.8166	616	26.8166	568	26.8166	702	26.8166	701	26.8166	662
	26.8333	573	26.8333	640	26.8333	627	26.8333	546	26.8333	678	26.8333	682	26.8333	673
	26.85	568	26.85	667	26.85	619	26.85	552	26.85	650	26.85	691	26.85	691
	26.8667	576	26.8667	682	26.8667	562	26.8667	607	26.8667	719	26.8667	716	26.8667	645
	26.8834	545	26.8834	629	26.8834	580	26.8834	562	26.8834	710	26.8834	679	26.8834	664
	26.9002	575	26.9002	668	26.9002	560	26.9002	551	26.9002	736	26.9002	679	26.9002	676
	26.9169	558	26.9169	630	26.9169	565	26.9169	597	26.9169	723	26.9169	704	26.9169	625
	26.9336	591	26.9336	585	26.9336	562	26.9336	550	26.9336	673	26.9336	737	26.9336	706
	26.9503	561	26.9503	489	26.9503	572	26.9503	538	26.9503	695	26.9503	664	26.9503	662
	26.967	616	26.967	529	26.967	580	26.967	554	26.967	719	26.967	711	26.967	638
	26.9837	554	26.9837	489	26.9837	595	26.9837	556	26.9837	722	26.9837	673	26.9837	636
	27.0004	579	27.0004	491	27.0004	585	27.0004	510	27.0004	741	27.0004	700	27.0004	643
	27.0171	592	27.0171	477	27.0171	589	27.0171	515	27.0171	731	27.0171	713	27.0171	662
	27.0338	582	27.0338	487	27.0338	565	27.0338	514	27.0338	717	27.0338	696	27.0338	632
	27.0506	536	27.0506	523	27.0506	592	27.0506	532	27.0506	699	27.0506	675	27.0506	592
	27.0673	556	27.0673	442	27.0673	564	27.0673	538	27.0673	741	27.0673	710	27.0673	629
	27.084	593	27.084	491	27.084	507	27.084	540	27.084	677	27.084	685	27.084	645
	27.1007	558	27.1007	491	27.1007	497	27.1007	547	27.1007	703	27.1007	618	27.1007	699
	27.1174	543	27.1174	487	27.1174	542	27.1174	489	27.1174	704	27.1174	666	27.1174	661
	27.1341	551	27.1341	457	27.1341	498	27.1341	526	27.1341	701	27.1341	720	27.1341	588
	27.1508	556	27.1508	460	27.1508	506	27.1508	511	27.1508	737	27.1508	661	27.1508	631
	27.1675	550	27.1675	479	27.1675	560	27.1675	536	27.1675	748	27.1675	749	27.1675	624
	27.1842	557	27.1842	512	27.1842	597	27.1842	559	27.1842	668	27.1842	696	27.1842	643
	27.2009	555	27.2009	507	27.2009	507	27.2009	516	27.2009	712	27.2009	704	27.2009	645
	27.2177	567	27.2177	521	27.2177	526	27.2177	507	27.2177	758	27.2177	663	27.2177	659
	27.2344	553	27.2344	530	27.2344	520	27.2344	519	27.2344	687	27.2344	698	27.2344	647
	27.2511	556	27.2511	500	27.2511	559	27.2511	537	27.2511	687	27.2511	699	27.2511	651
	27.2678	541	27.2678	553	27.2678	551	27.2678	500	27.2678	736	27.2678	683	27.2678	668
	27.2845	555	27.2845	583	27.2845	555	27.2845	534	27.2845	756	27.2845	686	27.2845	640
	27.3012	535	27.3012	572	27.3012	538	27.3012	531	27.3012	724	27.3012	719	27.3012	648
	27.3179	529	27.3179	643	27.3179	536	27.3179	540	27.3179	716	27.3179	745	27.3179	683
	27.3346	582	27.3346	662	27.3346	552	27.3346	515	27.3346	749	27.3346	679	27.3346	650
	27.3514	584	27.3514	727	27.3514	508	27.3514	526	27.3514	650	27.3514	699	27.3514	603
	27.3681	565	27.3681	801	27.3681	538	27.3681	484	27.3681	765	27.3681	677	27.3681	692
	27.3848	545	27.3848	900	27.3848	504	27.3848	487	27.3848	720	27.3848	677	27.3848	615
	27.4015	531	27.4015	1025	27.4015	558	27.4015	541	27.4015	727	27.4015	679	27.4015	630
	27.4182	541	27.4182	1065	27.4182	533	27.4182	519	27.4182	768	27.4182	663	27.4182	644
	27.4349	562	27.4349	1156	27.4349	508	27.4349	484	27.4349	765	27.4349	677	27.4349	658
	27.4516	551	27.4516	1052	27.4516	588	27.4516	495	27.4516	769	27.4516	695	27.4516	657
	27.4683	563	27.4683	1050	27.4683	542	27.4683	572	27.4683	786	27.4683	682	27.4683	648
	27.485	545	27.485	953	27.485	592	27.485	540	27.485	749	27.485	659	27.485	635
	27.5018	575	27.5018	927	27.5018	547	27.5018	508	27.5018	832	27.5018	662	27.5018	669
	27.5185	614	27.5185	897	27.5185	580	27.5185	511	27.5185	777	27.5185	716	27.5185	666
	27.5352	536	27.5352	826	27.5352	550	27.5352	481	27.5352	790	27.5352	754	27.5352	681
	27.5519	595	27.5519	818	27.5519	536	27.5519	582	27.5519	786	27.5519	709	27.5519	644
	27.5686	589	27.5686	713	27.5686	570	27.5686	562	27.5686	787	27.5686	727	27.5686	700
	27.5853	579	27.5853	620	27.5853	606	27.5853	526	27.5853	839	27.5853	745	27.5853	673
	27.602	608	27.602	652	27.602	584	27.602	568	27.602	829	27.602	694	27.602	693
	27.6187	636	27.6187	565	27.6187	560	27.6187	612	27.6187	776	27.6187	743	27.6187	643
	27.6354	548	27.6354	559	27.6354	629	27.6354	634	27.6354	825	27.6354	742	27.6354	678
	27.6522	651	27.6522	519	27.6522	683	27.6522	607	27.6522	826	27.6522	756	27.6522	665
	27.6689	675	27.6689	548	27.6689	699	27.6689	669	27.6689	870	27.6689	759	27.6689	746
	27.6856	688	27.6856	557	27.6856	742	27.6856	746	27.6856	887	27.6856	806	27.6856	736
	27.7023	761	27.7023	550	27.7023	799	27.7023	787	27.7023	915	27.7023	787	27.7023	766
	27.719	827	27.719	498	27.719	857	27.719	911	27.719	901	27.719	781	27.719	727
	27.7357	854	27.7357	616	27.7357	885	27.7357	1055	27.7357	1038	27.7357	815	27.7357	749
	27.7524	799	27.7524	620	27.7524	1065	27.7524	1228	27.7524	1111	27.7524	826	27.7524	737
	27.7691	877	27.7691	634	27.7691	1226	27.7691	1577	27.7691	1183	27.7691	911	27.7691	824
	27.7858	821	27.7858	688	27.7858	1290	27.7858	1509	27.7858	1142	27.7858	883	27.7858	760
	27.8026	847	27.8026	682	27.8026	1068	27.8026	1137	27.8026	1092	27.8026	870	27.8026	792
	27.8193	756	27.8193	656	27.8193	940	27.8193	1090	27.8193	1164	27.8193	921	27.8193	807
	27.836	738	27.836	666	27.836	910	27.836	1053	27.836	1121	27.836	924	27.836	829
	27.8527	699	27.8527	652	27.8527	810	27.8527	863	27.8527	1025	27.8527	901	27.8527	799
	27.8694	686	27.8694	625	27.8694	716	27.8694	745	27.8694	1011	27.8694	919	27.8694	817
	27.8861	647	27.8861	614	27.8861	659	27.8861	613	27.8861	1040	27.8861	936	27.8861	842
	27.9028	661	27.9028	612	27.9028	631	27.9028	608	27.9028	1021	27.9028	934	27.9028	876
	27.9195	673	27.9195	609	27.9195	612	27.9195	578	27.9195	1030	27.9195	950	27.9195	907
	27.9363	654	27.9363	564	27.9363	623	27.9363	564	27.9363	1030	27.9363	926	27.9363	935
	27.953	663	27.953	607	27.953	546	27.953	566	27.953	1056	27.953	993	27.953	1001
	27.9697	663	27.9697	587	27.9697	632	27.9697	560	27.9697	1071	27.9697	940	27.9697	997
	27.9864	706	27.9864	611	27.9864	631	27.9864	527	27.9864	1130	27.9864	1028	27.9864	1006
	28.0031	651	28.0031	622	28.0031	580	28.0031	569	28.0031	1115	28.0031	1017	28.0031	1082
	28.0198	685	28.0198	623	28.0198	580	28.0198	584	28.0198	1154	28.0198	1183	28.0198	1078
	28.0365	720	28.0365	636	28.0365	645	28.0365	581	28.0365	1102	28.0365	1134	28.0365	1138
	28.0532	757	28.0532	723	28.0532	641	28.0532	595	28.0532	1264	28.0532	1212	28.0532	1095
	28.0699	793	28.0699	748	28.0699	624	28.0699	623	28.0699	1263	28.0699	1215	28.0699	1290
	28.0866	811	28.0866	873	28.0866	631	28.0866	635	28.0866	1243	28.0866	1348	28.0866	1176
	28.1034	773	28.1034	923	28.1034	642	28.1034	614	28.1034	1375	28.1034	1376	28.1034	1300
	28.1201	863	28.1201	1066	28.1201	689	28.1201	604	28.1201	1433	28.1201	1447	28.1201	1369
	28.1368	866	28.1368	1085	28.1368	651	28.1368	615	28.1368	1452	28.1368	1522	28.1368	1359
	28.1535	904	28.1535	1071	28.1535	725	28.1535	643	28.1535	1536	28.1535	1690	28.1535	1468
	28.1702	982	28.1702	1039	28.1702	656	28.1702	616	28.1702	1625	28.1702	1756	28.1702	1493
	28.1869	1027	28.1869	1105	28.1869	688	28.1869	572	28.1869	1641	28.1869	1902	28.1869	1613
	28.2036	1068	28.2036	1138	28.2036	721	28.2036	715	28.2036	1709	28.2036	2157	28.2036	1750
	28.2203	1128	28.2203	1126	28.2203	730	28.2203	696	28.2203	1793	28.2203	2273	28.2203	1716
	28.237	1238	28.237	1110	28.237	784	28.237	700	28.237	1898	28.237	2380	28.237	1776
	28.2538	1251	28.2538	1236	28.2538	863	28.2538	786	28.2538	2131	28.2538	2682	28.2538	1903
	28.2705	1500	28.2705	1353	28.2705	911	28.2705	804	28.2705	2107	28.2705	2933	28.2705	2049
	28.2872	1569	28.2872	1371	28.2872	899	28.2872	896	28.2872	2170	28.2872	3195	28.2872	2157
	28.3039	1669	28.3039	1348	28.3039	1042	28.3039	896	28.3039	2289	28.3039	3527	28.3039	2315
	28.3206	1782	28.3206	1310	28.3206	1062	28.3206	977	28.3206	2365	28.3206	3720	28.3206	2404
	28.3373	1871	28.3373	1289	28.3373	1097	28.3373	1104	28.3373	2363	28.3373	4003	28.3373	2479
	28.354	1958	28.354	1145	28.354	1165	28.354	1094	28.354	2468	28.354	4205	28.354	2768
	28.3707	2000	28.3707	1104	28.3707	1303	28.3707	1173	28.3707	2484	28.3707	4250	28.3707	2878
	28.3875	1989	28.3875	1020	28.3875	1364	28.3875	1326	28.3875	2432	28.3875	4312	28.3875	2979
	28.4042	1900	28.4042	916	28.4042	1459	28.4042	1439	28.4042	2298	28.4042	3991	28.4042	3059
	28.4209	1898	28.4209	918	28.4209	1613	28.4209	1509	28.4209	2231	28.4209	3802	28.4209	3220
	28.4376	1674	28.4376	858	28.4376	1664	28.4376	1743	28.4376	2033	28.4376	3389	28.4376	3168
	28.4543	1541	28.4543	909	28.4543	1839	28.4543	1921	28.4543	1936	28.4543	3072	28.4543	3170
	28.471	1341	28.471	940	28.471	1904	28.471	2095	28.471	1855	28.471	2727	28.471	3052
	28.4877	1359	28.4877	1019	28.4877	2155	28.4877	2240	28.4877	1722	28.4877	2361	28.4877	2962
	28.5044	1218	28.5044	1037	28.5044	2406	28.5044	2567	28.5044	1650	28.5044	2281	28.5044	2904
	28.5211	1147	28.5211	1059	28.5211	2495	28.5211	2834	28.5211	1580	28.5211	1901	28.5211	2707
	28.5378	1087	28.5378	1196	28.5378	2757	28.5378	3209	28.5378	1473	28.5378	1790	28.5378	2569
	28.5546	1031	28.5546	1268	28.5546	3057	28.5546	3370	28.5546	1387	28.5546	1615	28.5546	2353
	28.5713	1022	28.5713	1315	28.5713	3180	28.5713	3823	28.5713	1308	28.5713	1472	28.5713	2228
	28.588	1027	28.588	1480	28.588	3399	28.588	3970	28.588	1338	28.588	1374	28.588	2222
	28.6047	989	28.6047	1451	28.6047	3852	28.6047	4167	28.6047	1307	28.6047	1324	28.6047	2024
	28.6214	994	28.6214	1533	28.6214	3951	28.6214	4394	28.6214	1202	28.6214	1281	28.6214	1972
	28.6381	899	28.6381	1483	28.6381	4070	28.6381	4375	28.6381	1216	28.6381	1263	28.6381	1792
	28.6548	944	28.6548	1484	28.6548	4088	28.6548	4395	28.6548	1190	28.6548	1176	28.6548	1724
	28.6715	893	28.6715	1445	28.6715	4222	28.6715	4348	28.6715	1175	28.6715	1092	28.6715	1602
	28.6883	899	28.6883	1384	28.6883	3847	28.6883	3999	28.6883	1103	28.6883	1150	28.6883	1748
	28.705	913	28.705	1315	28.705	3856	28.705	3681	28.705	1154	28.705	1038	28.705	1582
	28.7217	924	28.7217	1231	28.7217	3508	28.7217	3195	28.7217	1121	28.7217	1010	28.7217	1510
	28.7384	928	28.7384	1176	28.7384	3205	28.7384	2848	28.7384	1016	28.7384	1032	28.7384	1521
	28.7551	839	28.7551	1090	28.7551	2842	28.7551	2469	28.7551	1050	28.7551	1019	28.7551	1432
	28.7718	834	28.7718	979	28.7718	2545	28.7718	2192	28.7718	1001	28.7718	996	28.7718	1460
	28.7885	833	28.7885	967	28.7885	2283	28.7885	1920	28.7885	1019	28.7885	911	28.7885	1404
	28.8052	863	28.8052	893	28.8052	2016	28.8052	1689	28.8052	1044	28.8052	933	28.8052	1462
	28.8219	844	28.8219	788	28.8219	1757	28.8219	1436	28.8219	990	28.8219	954	28.8219	1353
	28.8387	860	28.8387	754	28.8387	1549	28.8387	1353	28.8387	918	28.8387	933	28.8387	1375
	28.8554	820	28.8554	717	28.8554	1398	28.8554	1288	28.8554	951	28.8554	940	28.8554	1402
	28.8721	793	28.8721	746	28.8721	1273	28.8721	1133	28.8721	992	28.8721	921	28.8721	1302
	28.8888	833	28.8888	679	28.8888	1201	28.8888	1092	28.8888	921	28.8888	849	28.8888	1371
	28.9055	777	28.9055	652	28.9055	1038	28.9055	1030	28.9055	961	28.9055	878	28.9055	1402
	28.9222	792	28.9222	570	28.9222	1075	28.9222	1029	28.9222	872	28.9222	909	28.9222	1327
	28.9389	791	28.9389	603	28.9389	1018	28.9389	988	28.9389	937	28.9389	853	28.9389	1373
	28.9556	827	28.9556	604	28.9556	972	28.9556	924	28.9556	959	28.9556	895	28.9556	1348
	28.9723	758	28.9723	610	28.9723	919	28.9723	931	28.9723	865	28.9723	860	28.9723	1387
	28.9891	754	28.9891	566	28.9891	916	28.9891	907	28.9891	911	28.9891	815	28.9891	1402
	29.0058	813	29.0058	618	29.0058	927	29.0058	896	29.0058	892	29.0058	846	29.0058	1423
	29.0225	832	29.0225	567	29.0225	886	29.0225	885	29.0225	833	29.0225	818	29.0225	1452
	29.0392	840	29.0392	587	29.0392	879	29.0392	838	29.0392	826	29.0392	836	29.0392	1554
	29.0559	866	29.0559	558	29.0559	908	29.0559	819	29.0559	855	29.0559	799	29.0559	1621
	29.0726	861	29.0726	615	29.0726	806	29.0726	803	29.0726	820	29.0726	745	29.0726	1671
	29.0893	884	29.0893	545	29.0893	808	29.0893	747	29.0893	800	29.0893	741	29.0893	1682
	29.106	1000	29.106	576	29.106	773	29.106	773	29.106	842	29.106	687	29.106	1837
	29.1227	901	29.1227	602	29.1227	801	29.1227	746	29.1227	795	29.1227	732	29.1227	1910
	29.1395	970	29.1395	606	29.1395	766	29.1395	761	29.1395	783	29.1395	728	29.1395	1869
	29.1562	954	29.1562	588	29.1562	753	29.1562	697	29.1562	847	29.1562	740	29.1562	1943
	29.1729	907	29.1729	616	29.1729	741	29.1729	710	29.1729	765	29.1729	657	29.1729	1754
	29.1896	883	29.1896	597	29.1896	757	29.1896	722	29.1896	787	29.1896	699	29.1896	1709
	29.2063	833	29.2063	604	29.2063	748	29.2063	727	29.2063	770	29.2063	667	29.2063	1491
	29.223	859	29.223	637	29.223	716	29.223	649	29.223	745	29.223	659	29.223	1382
	29.2397	802	29.2397	644	29.2397	691	29.2397	694	29.2397	798	29.2397	676	29.2397	1239
	29.2564	828	29.2564	669	29.2564	678	29.2564	716	29.2564	744	29.2564	677	29.2564	1101
	29.2732	831	29.2732	686	29.2732	611	29.2732	679	29.2732	702	29.2732	649	29.2732	1051
	29.2899	773	29.2899	721	29.2899	689	29.2899	667	29.2899	751	29.2899	654	29.2899	943
	29.3066	727	29.3066	800	29.3066	674	29.3066	661	29.3066	739	29.3066	638	29.3066	876
	29.3233	679	29.3233	841	29.3233	703	29.3233	647	29.3233	741	29.3233	663	29.3233	812
	29.34	664	29.34	845	29.34	625	29.34	638	29.34	692	29.34	652	29.34	804
	29.3567	622	29.3567	832	29.3567	684	29.3567	677	29.3567	752	29.3567	675	29.3567	802
	29.3734	681	29.3734	757	29.3734	638	29.3734	607	29.3734	767	29.3734	624	29.3734	777
	29.3901	629	29.3901	734	29.3901	615	29.3901	690	29.3901	688	29.3901	639	29.3901	733
	29.4068	628	29.4068	734	29.4068	667	29.4068	669	29.4068	712	29.4068	608	29.4068	731
	29.4235	639	29.4235	634	29.4235	677	29.4235	675	29.4235	712	29.4235	671	29.4235	729
	29.4403	631	29.4403	644	29.4403	726	29.4403	683	29.4403	736	29.4403	687	29.4403	712
	29.457	654	29.457	625	29.457	753	29.457	737	29.457	700	29.457	693	29.457	729
	29.4737	641	29.4737	629	29.4737	678	29.4737	770	29.4737	730	29.4737	682	29.4737	711
	29.4904	665	29.4904	639	29.4904	734	29.4904	771	29.4904	705	29.4904	708	29.4904	728
	29.5071	717	29.5071	658	29.5071	811	29.5071	813	29.5071	763	29.5071	686	29.5071	691
	29.5238	754	29.5238	640	29.5238	874	29.5238	899	29.5238	756	29.5238	734	29.5238	751
	29.5405	770	29.5405	730	29.5405	914	29.5405	1009	29.5405	757	29.5405	730	29.5405	722
	29.5572	771	29.5572	722	29.5572	1043	29.5572	1209	29.5572	852	29.5572	799	29.5572	790
	29.5739	919	29.5739	819	29.5739	1212	29.5739	1378	29.5739	835	29.5739	859	29.5739	755
	29.5907	908	29.5907	906	29.5907	1608	29.5907	1669	29.5907	852	29.5907	894	29.5907	837
	29.6074	970	29.6074	866	29.6074	1786	29.6074	1838	29.6074	933	29.6074	893	29.6074	799
	29.6241	1025	29.6241	883	29.6241	1561	29.6241	1937	29.6241	951	29.6241	905	29.6241	864
	29.6408	1021	29.6408	858	29.6408	1390	29.6408	1562	29.6408	977	29.6408	981	29.6408	936
	29.6575	1114	29.6575	923	29.6575	1489	29.6575	1542	29.6575	1030	29.6575	1044	29.6575	966
	29.6742	1195	29.6742	1031	29.6742	1547	29.6742	1628	29.6742	1142	29.6742	1097	29.6742	1041
	29.6909	1292	29.6909	1083	29.6909	1570	29.6909	1755	29.6909	1237	29.6909	1173	29.6909	1239
	29.7076	1472	29.7076	1233	29.7076	1547	29.7076	1675	29.7076	1348	29.7076	1316	29.7076	1338
	29.7244	1662	29.7244	1359	29.7244	1638	29.7244	1941	29.7244	1589	29.7244	1605	29.7244	1478
	29.7411	2058	29.7411	1477	29.7411	1861	29.7411	2413	29.7411	1819	29.7411	1997	29.7411	1741
	29.7578	2522	29.7578	1733	29.7578	2214	29.7578	2891	29.7578	2141	29.7578	2466	29.7578	2113
	29.7745	2846	29.7745	1966	29.7745	2507	29.7745	3068	29.7745	2430	29.7745	2797	29.7745	2410
	29.7912	3100	29.7912	2269	29.7912	2595	29.7912	3143	29.7912	2634	29.7912	2812	29.7912	2724
	29.8079	2982	29.8079	2384	29.8079	2384	29.8079	3139	29.8079	2683	29.8079	2763	29.8079	2767
	29.8246	2733	29.8246	2219	29.8246	2248	29.8246	2944	29.8246	2302	29.8246	2488	29.8246	2650
	29.8413	2386	29.8413	1861	29.8413	1943	29.8413	2427	29.8413	2071	29.8413	2120	29.8413	2251
	29.858	2024	29.858	1747	29.858	1686	29.858	2065	29.858	1919	29.858	1903	29.858	2066
	29.8747	1826	29.8747	1456	29.8747	1531	29.8747	1756	29.8747	1604	29.8747	1588	29.8747	1843
	29.8915	1423	29.8915	1329	29.8915	1181	29.8915	1487	29.8915	1339	29.8915	1407	29.8915	1529
	29.9082	1086	29.9082	1039	29.9082	990	29.9082	1134	29.9082	1131	29.9082	1062	29.9082	1228
	29.9249	964	29.9249	910	29.9249	853	29.9249	945	29.9249	953	29.9249	971	29.9249	1024
	29.9416	844	29.9416	774	29.9416	758	29.9416	831	29.9416	911	29.9416	877	29.9416	935
	29.9583	776	29.9583	690	29.9583	747	29.9583	795	29.9583	794	29.9583	804	29.9583	824
	29.975	670	29.975	675	29.975	693	29.975	734	29.975	781	29.975	804	29.975	777
	29.9917	716	29.9917	613	29.9917	628	29.9917	640	29.9917	712	29.9917	743	29.9917	716
	30.0084	673	30.0084	608	30.0084	625	30.0084	619	30.0084	730	30.0084	728	30.0084	669
	30.0252	622	30.0252	596	30.0252	586	30.0252	657	30.0252	746	30.0252	686	30.0252	694
	30.0419	611	30.0419	567	30.0419	612	30.0419	575	30.0419	696	30.0419	668	30.0419	667
	30.0586	554	30.0586	560	30.0586	528	30.0586	584	30.0586	682	30.0586	684	30.0586	584
	30.0753	536	30.0753	610	30.0753	527	30.0753	555	30.0753	655	30.0753	636	30.0753	623
	30.092	572	30.092	510	30.092	531	30.092	512	30.092	648	30.092	628	30.092	599
	30.1087	535	30.1087	541	30.1087	536	30.1087	537	30.1087	666	30.1087	573	30.1087	572
	30.1254	572	30.1254	536	30.1254	513	30.1254	521	30.1254	603	30.1254	585	30.1254	619
	30.1421	502	30.1421	527	30.1421	501	30.1421	536	30.1421	640	30.1421	616	30.1421	603
	30.1589	535	30.1589	505	30.1589	512	30.1589	487	30.1589	604	30.1589	570	30.1589	562
	30.1756	523	30.1756	524	30.1756	514	30.1756	501	30.1756	545	30.1756	568	30.1756	594
	30.1923	486	30.1923	477	30.1923	566	30.1923	493	30.1923	625	30.1923	575	30.1923	595
	30.209	522	30.209	491	30.209	499	30.209	494	30.209	611	30.209	557	30.209	542
	30.2257	470	30.2257	473	30.2257	498	30.2257	507	30.2257	632	30.2257	577	30.2257	582
	30.2424	483	30.2424	489	30.2424	469	30.2424	497	30.2424	570	30.2424	573	30.2424	540
	30.2591	483	30.2591	492	30.2591	504	30.2591	474	30.2591	607	30.2591	540	30.2591	577
	30.2758	510	30.2758	502	30.2758	479	30.2758	495	30.2758	597	30.2758	557	30.2758	537
	30.2925	486	30.2925	467	30.2925	497	30.2925	480	30.2925	593	30.2925	564	30.2925	518
	30.3092	482	30.3092	485	30.3092	465	30.3092	503	30.3092	594	30.3092	543	30.3092	589
	30.326	489	30.326	477	30.326	458	30.326	488	30.326	623	30.326	560	30.326	536
	30.3427	515	30.3427	497	30.3427	444	30.3427	454	30.3427	622	30.3427	527	30.3427	535
	30.3594	481	30.3594	533	30.3594	457	30.3594	489	30.3594	595	30.3594	580	30.3594	547
	30.3761	481	30.3761	532	30.3761	478	30.3761	461	30.3761	565	30.3761	540	30.3761	509
	30.3928	476	30.3928	553	30.3928	442	30.3928	440	30.3928	569	30.3928	545	30.3928	567
	30.4095	474	30.4095	552	30.4095	533	30.4095	475	30.4095	579	30.4095	563	30.4095	557
	30.4262	434	30.4262	612	30.4262	484	30.4262	456	30.4262	624	30.4262	579	30.4262	537
	30.4429	496	30.4429	597	30.4429	445	30.4429	465	30.4429	615	30.4429	536	30.4429	501
	30.4596	491	30.4596	651	30.4596	461	30.4596	443	30.4596	552	30.4596	550	30.4596	520
	30.4764	497	30.4764	761	30.4764	456	30.4764	502	30.4764	581	30.4764	554	30.4764	535
	30.4931	481	30.4931	845	30.4931	456	30.4931	430	30.4931	557	30.4931	552	30.4931	525
	30.5098	425	30.5098	913	30.5098	466	30.5098	447	30.5098	561	30.5098	546	30.5098	529
	30.5265	501	30.5265	955	30.5265	493	30.5265	481	30.5265	577	30.5265	540	30.5265	549
	30.5432	537	30.5432	928	30.5432	486	30.5432	440	30.5432	564	30.5432	525	30.5432	468
	30.5599	540	30.5599	981	30.5599	474	30.5599	451	30.5599	570	30.5599	537	30.5599	530
	30.5766	507	30.5766	865	30.5766	487	30.5766	452	30.5766	525	30.5766	582	30.5766	507
	30.5933	505	30.5933	800	30.5933	467	30.5933	473	30.5933	527	30.5933	515	30.5933	508
	30.6101	535	30.6101	795	30.6101	436	30.6101	470	30.6101	560	30.6101	527	30.6101	525
	30.6268	501	30.6268	725	30.6268	461	30.6268	454	30.6268	549	30.6268	566	30.6268	502
	30.6435	524	30.6435	712	30.6435	481	30.6435	440	30.6435	553	30.6435	507	30.6435	510
	30.6602	521	30.6602	603	30.6602	476	30.6602	437	30.6602	542	30.6602	556	30.6602	519
	30.6769	532	30.6769	651	30.6769	493	30.6769	422	30.6769	577	30.6769	557	30.6769	475
	30.6936	539	30.6936	624	30.6936	510	30.6936	449	30.6936	529	30.6936	526	30.6936	496
	30.7103	539	30.7103	691	30.7103	496	30.7103	440	30.7103	528	30.7103	550	30.7103	479
	30.727	520	30.727	712	30.727	467	30.727	392	30.727	559	30.727	574	30.727	511
	30.7437	498	30.7437	704	30.7437	457	30.7437	434	30.7437	556	30.7437	566	30.7437	494
	30.7604	515	30.7604	850	30.7604	449	30.7604	430	30.7604	574	30.7604	561	30.7604	478
	30.7772	502	30.7772	853	30.7772	452	30.7772	438	30.7772	539	30.7772	560	30.7772	470
	30.7939	524	30.7939	848	30.7939	446	30.7939	417	30.7939	512	30.7939	539	30.7939	489
	30.8106	485	30.8106	815	30.8106	473	30.8106	396	30.8106	581	30.8106	546	30.8106	516
	30.8273	468	30.8273	811	30.8273	471	30.8273	430	30.8273	549	30.8273	533	30.8273	491
	30.844	454	30.844	703	30.844	475	30.844	442	30.844	567	30.844	486	30.844	505
	30.8607	469	30.8607	654	30.8607	453	30.8607	429	30.8607	541	30.8607	519	30.8607	512
	30.8774	425	30.8774	655	30.8774	455	30.8774	423	30.8774	521	30.8774	494	30.8774	493
	30.8941	459	30.8941	592	30.8941	424	30.8941	442	30.8941	555	30.8941	486	30.8941	511
	30.9108	433	30.9108	542	30.9108	454	30.9108	470	30.9108	573	30.9108	540	30.9108	497
	30.9276	471	30.9276	547	30.9276	457	30.9276	438	30.9276	537	30.9276	494	30.9276	510
	30.9443	471	30.9443	479	30.9443	436	30.9443	449	30.9443	562	30.9443	486	30.9443	538
	30.961	420	30.961	474	30.961	451	30.961	464	30.961	534	30.961	513	30.961	511
	30.9777	456	30.9777	475	30.9777	468	30.9777	433	30.9777	569	30.9777	502	30.9777	519
	30.9944	503	30.9944	488	30.9944	493	30.9944	467	30.9944	525	30.9944	486	30.9944	473
	31.0111	460	31.0111	520	31.0111	472	31.0111	477	31.0111	561	31.0111	498	31.0111	484
	31.0278	493	31.0278	454	31.0278	426	31.0278	472	31.0278	553	31.0278	483	31.0278	529
	31.0445	502	31.0445	451	31.0445	485	31.0445	479	31.0445	551	31.0445	522	31.0445	507
	31.0613	481	31.0613	444	31.0613	482	31.0613	471	31.0613	547	31.0613	492	31.0613	501
	31.078	516	31.078	503	31.078	452	31.078	426	31.078	543	31.078	486	31.078	481
	31.0947	523	31.0947	489	31.0947	479	31.0947	459	31.0947	521	31.0947	493	31.0947	487
	31.1114	474	31.1114	458	31.1114	430	31.1114	431	31.1114	522	31.1114	524	31.1114	458
	31.1281	474	31.1281	427	31.1281	453	31.1281	431	31.1281	513	31.1281	489	31.1281	563
	31.1448	507	31.1448	465	31.1448	495	31.1448	426	31.1448	505	31.1448	493	31.1448	513
	31.1615	452	31.1615	457	31.1615	428	31.1615	414	31.1615	568	31.1615	483	31.1615	506
	31.1782	459	31.1782	445	31.1782	458	31.1782	398	31.1782	549	31.1782	535	31.1782	470
	31.1949	477	31.1949	474	31.1949	425	31.1949	411	31.1949	515	31.1949	502	31.1949	528
	31.2117	418	31.2117	414	31.2117	430	31.2117	406	31.2117	529	31.2117	521	31.2117	475
	31.2284	447	31.2284	463	31.2284	473	31.2284	460	31.2284	487	31.2284	459	31.2284	485
	31.2451	441	31.2451	424	31.2451	483	31.2451	423	31.2451	531	31.2451	452	31.2451	479
	31.2618	449	31.2618	467	31.2618	427	31.2618	426	31.2618	512	31.2618	509	31.2618	502
	31.2785	447	31.2785	402	31.2785	440	31.2785	417	31.2785	541	31.2785	488	31.2785	453
	31.2952	493	31.2952	453	31.2952	447	31.2952	434	31.2952	543	31.2952	497	31.2952	478
	31.3119	499	31.3119	418	31.3119	464	31.3119	404	31.3119	538	31.3119	508	31.3119	489
	31.3286	508	31.3286	421	31.3286	415	31.3286	405	31.3286	547	31.3286	451	31.3286	478
	31.3453	483	31.3453	468	31.3453	412	31.3453	367	31.3453	534	31.3453	530	31.3453	468
	31.3621	564	31.3621	465	31.3621	445	31.3621	407	31.3621	550	31.3621	500	31.3621	478
	31.3788	614	31.3788	472	31.3788	428	31.3788	439	31.3788	520	31.3788	474	31.3788	469
	31.3955	820	31.3955	511	31.3955	466	31.3955	391	31.3955	541	31.3955	459	31.3955	482
	31.4122	915	31.4122	528	31.4122	414	31.4122	442	31.4122	550	31.4122	481	31.4122	483
	31.4289	873	31.4289	495	31.4289	495	31.4289	406	31.4289	575	31.4289	512	31.4289	508
	31.4456	800	31.4456	607	31.4456	499	31.4456	421	31.4456	481	31.4456	513	31.4456	476
	31.4623	765	31.4623	601	31.4623	432	31.4623	409	31.4623	507	31.4623	479	31.4623	464
	31.479	741	31.479	696	31.479	398	31.479	386	31.479	543	31.479	470	31.479	447
	31.4958	718	31.4958	798	31.4958	438	31.4958	397	31.4958	559	31.4958	524	31.4958	463
	31.5125	586	31.5125	927	31.5125	463	31.5125	436	31.5125	516	31.5125	518	31.5125	481
	31.5292	526	31.5292	1130	31.5292	452	31.5292	432	31.5292	507	31.5292	476	31.5292	422
	31.5459	447	31.5459	1206	31.5459	424	31.5459	445	31.5459	527	31.5459	502	31.5459	440
	31.5626	473	31.5626	1218	31.5626	440	31.5626	402	31.5626	516	31.5626	515	31.5626	467
	31.5793	504	31.5793	1138	31.5793	440	31.5793	433	31.5793	522	31.5793	486	31.5793	432
	31.596	499	31.596	1177	31.596	441	31.596	442	31.596	536	31.596	471	31.596	479
	31.6127	478	31.6127	1109	31.6127	441	31.6127	427	31.6127	513	31.6127	457	31.6127	454
	31.6294	506	31.6294	1039	31.6294	429	31.6294	402	31.6294	520	31.6294	480	31.6294	467
	31.6461	550	31.6461	958	31.6461	459	31.6461	472	31.6461	537	31.6461	501	31.6461	483
	31.6629	539	31.6629	872	31.6629	404	31.6629	415	31.6629	529	31.6629	486	31.6629	468
	31.6796	588	31.6796	804	31.6796	452	31.6796	391	31.6796	541	31.6796	520	31.6796	434
	31.6963	562	31.6963	743	31.6963	442	31.6963	440	31.6963	529	31.6963	479	31.6963	505
	31.713	600	31.713	684	31.713	442	31.713	392	31.713	557	31.713	491	31.713	469
	31.7297	542	31.7297	664	31.7297	409	31.7297	404	31.7297	489	31.7297	503	31.7297	473
	31.7464	582	31.7464	618	31.7464	449	31.7464	430	31.7464	516	31.7464	497	31.7464	474
	31.7631	515	31.7631	584	31.7631	421	31.7631	382	31.7631	502	31.7631	445	31.7631	453
	31.7798	515	31.7798	572	31.7798	430	31.7798	407	31.7798	501	31.7798	509	31.7798	451
	31.7965	516	31.7965	508	31.7965	452	31.7965	450	31.7965	508	31.7965	485	31.7965	473
	31.8133	474	31.8133	507	31.8133	432	31.8133	427	31.8133	499	31.8133	482	31.8133	461
	31.83	460	31.83	484	31.83	441	31.83	429	31.83	538	31.83	485	31.83	501
	31.8467	443	31.8467	461	31.8467	430	31.8467	416	31.8467	491	31.8467	485	31.8467	499
	31.8634	456	31.8634	471	31.8634	454	31.8634	380	31.8634	527	31.8634	446	31.8634	471
	31.8801	447	31.8801	486	31.8801	393	31.8801	447	31.8801	512	31.8801	476	31.8801	469
	31.8968	427	31.8968	509	31.8968	456	31.8968	416	31.8968	504	31.8968	513	31.8968	423
	31.9135	472	31.9135	525	31.9135	407	31.9135	440	31.9135	531	31.9135	508	31.9135	457
	31.9302	449	31.9302	473	31.9302	393	31.9302	426	31.9302	506	31.9302	473	31.9302	469
	31.947	447	31.947	509	31.947	409	31.947	429	31.947	502	31.947	440	31.947	434
	31.9637	433	31.9637	513	31.9637	413	31.9637	432	31.9637	448	31.9637	459	31.9637	459
	31.9804	412	31.9804	529	31.9804	433	31.9804	377	31.9804	491	31.9804	468	31.9804	425
	31.9971	425	31.9971	554	31.9971	402	31.9971	428	31.9971	534	31.9971	417	31.9971	421
	32.0138	463	32.0138	545	32.0138	423	32.0138	412	32.0138	496	32.0138	464	32.0138	467
	32.0305	480	32.0305	591	32.0305	412	32.0305	391	32.0305	513	32.0305	494	32.0305	418
	32.0472	400	32.0472	650	32.0472	471	32.0472	442	32.0472	492	32.0472	469	32.0472	434
	32.0639	479	32.0639	612	32.0639	423	32.0639	425	32.0639	504	32.0639	454	32.0639	448
	32.0806	449	32.0806	605	32.0806	457	32.0806	431	32.0806	504	32.0806	457	32.0806	508
	32.0973	466	32.0973	618	32.0973	463	32.0973	426	32.0973	510	32.0973	444	32.0973	431
	32.1141	454	32.1141	628	32.1141	430	32.1141	455	32.1141	483	32.1141	454	32.1141	442
	32.1308	450	32.1308	561	32.1308	460	32.1308	395	32.1308	469	32.1308	481	32.1308	439
	32.1475	474	32.1475	601	32.1475	489	32.1475	437	32.1475	487	32.1475	481	32.1475	443
	32.1642	461	32.1642	583	32.1642	434	32.1642	446	32.1642	525	32.1642	507	32.1642	460
	32.1809	468	32.1809	644	32.1809	452	32.1809	427	32.1809	505	32.1809	479	32.1809	442
	32.1976	485	32.1976	637	32.1976	393	32.1976	415	32.1976	524	32.1976	470	32.1976	384
	32.2143	499	32.2143	682	32.2143	422	32.2143	413	32.2143	511	32.2143	485	32.2143	424
	32.231	461	32.231	774	32.231	430	32.231	428	32.231	480	32.231	472	32.231	417
	32.2478	485	32.2478	856	32.2478	441	32.2478	397	32.2478	529	32.2478	489	32.2478	428
	32.2645	460	32.2645	936	32.2645	440	32.2645	373	32.2645	541	32.2645	476	32.2645	463
	32.2812	431	32.2812	1136	32.2812	428	32.2812	378	32.2812	537	32.2812	465	32.2812	410
	32.2979	447	32.2979	1373	32.2979	438	32.2979	433	32.2979	467	32.2979	471	32.2979	481
	32.3146	409	32.3146	1554	32.3146	417	32.3146	427	32.3146	534	32.3146	477	32.3146	418
	32.3313	436	32.3313	1652	32.3313	400	32.3313	392	32.3313	513	32.3313	449	32.3313	436
	32.348	436	32.348	1682	32.348	359	32.348	387	32.348	481	32.348	499	32.348	423
	32.3647	456	32.3647	1770	32.3647	428	32.3647	388	32.3647	489	32.3647	446	32.3647	493
	32.3814	454	32.3814	1893	32.3814	424	32.3814	434	32.3814	500	32.3814	468	32.3814	414
	32.3982	424	32.3982	2156	32.3982	370	32.3982	364	32.3982	514	32.3982	511	32.3982	457
	32.4149	475	32.4149	2089	32.4149	430	32.4149	432	32.4149	475	32.4149	442	32.4149	405
	32.4316	430	32.4316	2332	32.4316	427	32.4316	385	32.4316	483	32.4316	456	32.4316	475
	32.4483	446	32.4483	2479	32.4483	418	32.4483	415	32.4483	463	32.4483	484	32.4483	461
	32.465	474	32.465	2727	32.465	388	32.465	392	32.465	497	32.465	459	32.465	472
	32.4817	492	32.4817	3181	32.4817	411	32.4817	367	32.4817	512	32.4817	480	32.4817	439
	32.4984	493	32.4984	3815	32.4984	421	32.4984	373	32.4984	479	32.4984	447	32.4984	417
	32.5151	478	32.5151	4620	32.5151	403	32.5151	388	32.5151	503	32.5151	443	32.5151	420
	32.5318	484	32.5318	5419	32.5318	426	32.5318	390	32.5318	466	32.5318	482	32.5318	450
	32.5486	510	32.5486	6105	32.5486	377	32.5486	416	32.5486	532	32.5486	441	32.5486	396
	32.5653	478	32.5653	5901	32.5653	429	32.5653	400	32.5653	493	32.5653	488	32.5653	463
	32.582	483	32.582	5577	32.582	426	32.582	413	32.582	453	32.582	473	32.582	395
	32.5987	447	32.5987	5273	32.5987	386	32.5987	419	32.5987	537	32.5987	498	32.5987	428
	32.6154	450	32.6154	4992	32.6154	388	32.6154	438	32.6154	475	32.6154	487	32.6154	428
	32.6321	436	32.6321	4339	32.6321	424	32.6321	404	32.6321	483	32.6321	428	32.6321	418
	32.6488	445	32.6488	3719	32.6488	397	32.6488	405	32.6488	496	32.6488	541	32.6488	425
	32.6655	496	32.6655	3495	32.6655	426	32.6655	373	32.6655	498	32.6655	481	32.6655	431
	32.6823	570	32.6823	3248	32.6823	407	32.6823	402	32.6823	491	32.6823	491	32.6823	444
	32.699	697	32.699	2230	32.699	401	32.699	398	32.699	482	32.699	485	32.699	417
	32.7157	818	32.7157	1765	32.7157	431	32.7157	364	32.7157	513	32.7157	478	32.7157	470
	32.7324	737	32.7324	1565	32.7324	396	32.7324	402	32.7324	493	32.7324	494	32.7324	457
	32.7491	726	32.7491	1649	32.7491	389	32.7491	360	32.7491	474	32.7491	487	32.7491	447
	32.7658	806	32.7658	1347	32.7658	395	32.7658	411	32.7658	527	32.7658	512	32.7658	403
	32.7825	819	32.7825	1229	32.7825	410	32.7825	382	32.7825	548	32.7825	491	32.7825	416
	32.7992	741	32.7992	1210	32.7992	428	32.7992	386	32.7992	461	32.7992	457	32.7992	428
	32.8159	683	32.8159	1241	32.8159	418	32.8159	398	32.8159	483	32.8159	522	32.8159	476
	32.8327	659	32.8327	1169	32.8327	418	32.8327	379	32.8327	521	32.8327	495	32.8327	461
	32.8494	695	32.8494	1212	32.8494	419	32.8494	347	32.8494	515	32.8494	508	32.8494	444
	32.8661	763	32.8661	1182	32.8661	445	32.8661	416	32.8661	497	32.8661	482	32.8661	427
	32.8828	730	32.8828	1204	32.8828	389	32.8828	341	32.8828	495	32.8828	469	32.8828	412
	32.8995	721	32.8995	1195	32.8995	411	32.8995	342	32.8995	479	32.8995	474	32.8995	441
	32.9162	640	32.9162	1273	32.9162	376	32.9162	360	32.9162	464	32.9162	497	32.9162	488
	32.9329	684	32.9329	1317	32.9329	397	32.9329	366	32.9329	500	32.9329	468	32.9329	457
	32.9496	749	32.9496	1416	32.9496	402	32.9496	414	32.9496	469	32.9496	482	32.9496	429
	32.9663	734	32.9663	1379	32.9663	395	32.9663	413	32.9663	460	32.9663	475	32.9663	437
	32.983	588	32.983	1531	32.983	401	32.983	400	32.983	488	32.983	511	32.983	413
	32.9998	601	32.9998	1540	32.9998	407	32.9998	384	32.9998	521	32.9998	474	32.9998	429
	33.0165	583	33.0165	1699	33.0165	402	33.0165	390	33.0165	495	33.0165	504	33.0165	415
	33.0332	561	33.0332	1857	33.0332	420	33.0332	394	33.0332	500	33.0332	510	33.0332	428
	33.0499	475	33.0499	1984	33.0499	396	33.0499	364	33.0499	467	33.0499	491	33.0499	433
	33.0666	508	33.0666	2172	33.0666	399	33.0666	400	33.0666	494	33.0666	483	33.0666	416
	33.0833	474	33.0833	2480	33.0833	390	33.0833	382	33.0833	468	33.0833	518	33.0833	429
	33.1	434	33.1	2812	33.1	437	33.1	395	33.1	475	33.1	492	33.1	439
	33.1167	499	33.1167	3327	33.1167	387	33.1167	380	33.1167	450	33.1167	464	33.1167	432
	33.1335	465	33.1335	3663	33.1335	405	33.1335	415	33.1335	459	33.1335	502	33.1335	411
	33.1502	485	33.1502	3932	33.1502	414	33.1502	409	33.1502	506	33.1502	442	33.1502	426
	33.1669	507	33.1669	4057	33.1669	405	33.1669	384	33.1669	470	33.1669	491	33.1669	421
	33.1836	556	33.1836	4064	33.1836	403	33.1836	372	33.1836	428	33.1836	474	33.1836	424
	33.2003	577	33.2003	3850	33.2003	395	33.2003	402	33.2003	461	33.2003	501	33.2003	398
	33.217	759	33.217	3666	33.217	357	33.217	380	33.217	455	33.217	499	33.217	424
	33.2337	864	33.2337	3395	33.2337	388	33.2337	374	33.2337	516	33.2337	510	33.2337	416
	33.2504	928	33.2504	3176	33.2504	402	33.2504	415	33.2504	471	33.2504	569	33.2504	437
	33.2671	935	33.2671	2850	33.2671	424	33.2671	392	33.2671	476	33.2671	566	33.2671	448
	33.2839	1012	33.2839	2707	33.2839	398	33.2839	421	33.2839	458	33.2839	540	33.2839	383
	33.3006	931	33.3006	2396	33.3006	374	33.3006	361	33.3006	480	33.3006	609	33.3006	420
	33.3173	849	33.3173	2250	33.3173	422	33.3173	401	33.3173	487	33.3173	526	33.3173	409
	33.334	815	33.334	1968	33.334	379	33.334	393	33.334	516	33.334	519	33.334	420
	33.3507	758	33.3507	1749	33.3507	386	33.3507	377	33.3507	478	33.3507	508	33.3507	424
	33.3674	748	33.3674	1642	33.3674	370	33.3674	375	33.3674	510	33.3674	511	33.3674	425
	33.3841	637	33.3841	1282	33.3841	403	33.3841	361	33.3841	476	33.3841	509	33.3841	410
	33.4008	577	33.4008	1245	33.4008	401	33.4008	383	33.4008	424	33.4008	484	33.4008	448
	33.4175	533	33.4175	1027	33.4175	383	33.4175	387	33.4175	469	33.4175	484	33.4175	411
	33.4342	479	33.4342	853	33.4342	386	33.4342	400	33.4342	478	33.4342	463	33.4342	444
	33.451	467	33.451	717	33.451	421	33.451	363	33.451	485	33.451	482	33.451	420
	33.4677	445	33.4677	623	33.4677	383	33.4677	382	33.4677	508	33.4677	421	33.4677	387
	33.4844	411	33.4844	576	33.4844	398	33.4844	423	33.4844	491	33.4844	499	33.4844	429
	33.5011	439	33.5011	539	33.5011	392	33.5011	359	33.5011	472	33.5011	471	33.5011	423
	33.5178	453	33.5178	561	33.5178	413	33.5178	378	33.5178	463	33.5178	496	33.5178	428
	33.5345	433	33.5345	520	33.5345	399	33.5345	384	33.5345	448	33.5345	460	33.5345	398
	33.5512	447	33.5512	538	33.5512	385	33.5512	387	33.5512	475	33.5512	474	33.5512	420
	33.5679	404	33.5679	476	33.5679	379	33.5679	386	33.5679	470	33.5679	478	33.5679	433
	33.5847	380	33.5847	492	33.5847	410	33.5847	413	33.5847	503	33.5847	464	33.5847	375
	33.6014	392	33.6014	509	33.6014	388	33.6014	373	33.6014	487	33.6014	456	33.6014	441
	33.6181	433	33.6181	501	33.6181	417	33.6181	385	33.6181	455	33.6181	437	33.6181	407
	33.6348	403	33.6348	457	33.6348	407	33.6348	375	33.6348	493	33.6348	397	33.6348	390
	33.6515	439	33.6515	450	33.6515	397	33.6515	394	33.6515	467	33.6515	436	33.6515	402
	33.6682	399	33.6682	419	33.6682	399	33.6682	427	33.6682	449	33.6682	467	33.6682	410
	33.6849	404	33.6849	472	33.6849	414	33.6849	371	33.6849	425	33.6849	471	33.6849	419
	33.7016	419	33.7016	444	33.7016	391	33.7016	368	33.7016	448	33.7016	415	33.7016	452
	33.7184	371	33.7184	432	33.7184	403	33.7184	385	33.7184	469	33.7184	470	33.7184	415
	33.7351	449	33.7351	473	33.7351	387	33.7351	388	33.7351	441	33.7351	430	33.7351	405
	33.7518	426	33.7518	464	33.7518	389	33.7518	394	33.7518	449	33.7518	461	33.7518	423
	33.7685	421	33.7685	431	33.7685	377	33.7685	402	33.7685	417	33.7685	460	33.7685	380
	33.7852	401	33.7852	503	33.7852	391	33.7852	388	33.7852	438	33.7852	396	33.7852	386
	33.8019	405	33.8019	480	33.8019	393	33.8019	377	33.8019	443	33.8019	443	33.8019	393
	33.8186	407	33.8186	500	33.8186	386	33.8186	398	33.8186	456	33.8186	476	33.8186	411
	33.8353	433	33.8353	477	33.8353	376	33.8353	400	33.8353	468	33.8353	477	33.8353	426
	33.852	371	33.852	526	33.852	337	33.852	390	33.852	460	33.852	424	33.852	414
	33.8687	394	33.8687	484	33.8687	378	33.8687	394	33.8687	456	33.8687	406	33.8687	407
	33.8855	379	33.8855	543	33.8855	401	33.8855	407	33.8855	414	33.8855	422	33.8855	384
	33.9022	383	33.9022	474	33.9022	419	33.9022	392	33.9022	460	33.9022	428	33.9022	398
	33.9189	428	33.9189	547	33.9189	393	33.9189	352	33.9189	431	33.9189	434	33.9189	418
	33.9356	411	33.9356	535	33.9356	427	33.9356	406	33.9356	456	33.9356	452	33.9356	406
	33.9523	386	33.9523	543	33.9523	362	33.9523	386	33.9523	467	33.9523	396	33.9523	378
	33.969	400	33.969	562	33.969	400	33.969	402	33.969	463	33.969	400	33.969	428
	33.9857	379	33.9857	483	33.9857	380	33.9857	410	33.9857	454	33.9857	419	33.9857	398
	34.0024	419	34.0024	502	34.0024	392	34.0024	412	34.0024	417	34.0024	448	34.0024	413
	34.0192	403	34.0192	454	34.0192	378	34.0192	368	34.0192	422	34.0192	441	34.0192	386
	34.0359	400	34.0359	451	34.0359	386	34.0359	396	34.0359	449	34.0359	442	34.0359	401
	34.0526	382	34.0526	411	34.0526	363	34.0526	390	34.0526	488	34.0526	443	34.0526	404
	34.0693	390	34.0693	484	34.0693	382	34.0693	407	34.0693	438	34.0693	407	34.0693	402
	34.086	403	34.086	390	34.086	386	34.086	386	34.086	468	34.086	414	34.086	421
	34.1027	414	34.1027	400	34.1027	404	34.1027	363	34.1027	459	34.1027	422	34.1027	378
	34.1194	402	34.1194	419	34.1194	444	34.1194	390	34.1194	440	34.1194	438	34.1194	401
	34.1361	410	34.1361	450	34.1361	409	34.1361	364	34.1361	484	34.1361	473	34.1361	433
	34.1528	424	34.1528	422	34.1528	420	34.1528	380	34.1528	454	34.1528	445	34.1528	434
	34.1696	414	34.1696	451	34.1696	379	34.1696	388	34.1696	479	34.1696	441	34.1696	433
	34.1863	444	34.1863	436	34.1863	420	34.1863	401	34.1863	470	34.1863	437	34.1863	420
	34.203	421	34.203	419	34.203	440	34.203	395	34.203	444	34.203	466	34.203	430
	34.2197	421	34.2197	456	34.2197	491	34.2197	427	34.2197	469	34.2197	436	34.2197	380
	34.2364	446	34.2364	406	34.2364	456	34.2364	434	34.2364	466	34.2364	433	34.2364	410
	34.2531	426	34.2531	454	34.2531	449	34.2531	464	34.2531	474	34.2531	420	34.2531	352
	34.2698	437	34.2698	405	34.2698	496	34.2698	415	34.2698	441	34.2698	430	34.2698	394
	34.2865	475	34.2865	461	34.2865	505	34.2865	428	34.2865	455	34.2865	398	34.2865	426
	34.3032	463	34.3032	437	34.3032	536	34.3032	474	34.3032	489	34.3032	439	34.3032	387
	34.3199	470	34.3199	423	34.3199	580	34.3199	483	34.3199	431	34.3199	438	34.3199	427
	34.3367	427	34.3367	410	34.3367	510	34.3367	482	34.3367	466	34.3367	459	34.3367	396
	34.3534	427	34.3534	441	34.3534	503	34.3534	486	34.3534	451	34.3534	387	34.3534	388
	34.3701	454	34.3701	398	34.3701	453	34.3701	449	34.3701	467	34.3701	451	34.3701	417
	34.3868	411	34.3868	376	34.3868	527	34.3868	469	34.3868	433	34.3868	407	34.3868	442
	34.4035	415	34.4035	386	34.4035	511	34.4035	431	34.4035	406	34.4035	415	34.4035	397
	34.4202	412	34.4202	412	34.4202	494	34.4202	441	34.4202	455	34.4202	426	34.4202	439
	34.4369	433	34.4369	433	34.4369	453	34.4369	456	34.4369	422	34.4369	463	34.4369	440
	34.4536	442	34.4536	426	34.4536	492	34.4536	511	34.4536	444	34.4536	433	34.4536	383
	34.4704	479	34.4704	396	34.4704	500	34.4704	407	34.4704	465	34.4704	450	34.4704	406
	34.4871	420	34.4871	389	34.4871	513	34.4871	457	34.4871	448	34.4871	434	34.4871	362
	34.5038	426	34.5038	411	34.5038	552	34.5038	498	34.5038	421	34.5038	503	34.5038	391
	34.5205	504	34.5205	409	34.5205	655	34.5205	543	34.5205	458	34.5205	477	34.5205	440
	34.5372	533	34.5372	404	34.5372	701	34.5372	631	34.5372	468	34.5372	482	34.5372	412
	34.5539	631	34.5539	414	34.5539	759	34.5539	739	34.5539	523	34.5539	431	34.5539	372
	34.5706	639	34.5706	436	34.5706	748	34.5706	681	34.5706	485	34.5706	453	34.5706	394
	34.5873	549	34.5873	437	34.5873	650	34.5873	596	34.5873	484	34.5873	412	34.5873	397
	34.604	505	34.604	432	34.604	642	34.604	619	34.604	459	34.604	427	34.604	397
	34.6208	515	34.6208	465	34.6208	636	34.6208	665	34.6208	498	34.6208	441	34.6208	382
	34.6375	548	34.6375	486	34.6375	678	34.6375	649	34.6375	472	34.6375	471	34.6375	418
	34.6542	500	34.6542	474	34.6542	709	34.6542	631	34.6542	456	34.6542	461	34.6542	370
	34.6709	508	34.6709	530	34.6709	654	34.6709	609	34.6709	455	34.6709	442	34.6709	346
	34.6876	533	34.6876	527	34.6876	715	34.6876	744	34.6876	515	34.6876	412	34.6876	395
	34.7043	561	34.7043	477	34.7043	813	34.7043	829	34.7043	471	34.7043	434	34.7043	410
	34.721	645	34.721	532	34.721	1019	34.721	1031	34.721	482	34.721	467	34.721	399
	34.7377	666	34.7377	533	34.7377	1547	34.7377	1156	34.7377	448	34.7377	453	34.7377	412
	34.7544	573	34.7544	577	34.7544	2008	34.7544	1147	34.7544	464	34.7544	417	34.7544	412
	34.7712	506	34.7712	509	34.7712	1665	34.7712	931	34.7712	522	34.7712	427	34.7712	399
	34.7879	627	34.7879	510	34.7879	1149	34.7879	827	34.7879	463	34.7879	436	34.7879	409
	34.8046	718	34.8046	555	34.8046	1009	34.8046	879	34.8046	444	34.8046	444	34.8046	384
	34.8213	629	34.8213	492	34.8213	1213	34.8213	839	34.8213	482	34.8213	447	34.8213	404
	34.838	582	34.838	524	34.838	1200	34.838	721	34.838	453	34.838	451	34.838	383
	34.8547	525	34.8547	528	34.8547	932	34.8547	578	34.8547	466	34.8547	432	34.8547	400
	34.8714	482	34.8714	468	34.8714	660	34.8714	503	34.8714	451	34.8714	450	34.8714	409
	34.8881	494	34.8881	459	34.8881	519	34.8881	488	34.8881	452	34.8881	426	34.8881	391
	34.9049	441	34.9049	496	34.9049	473	34.9049	446	34.9049	443	34.9049	450	34.9049	382
	34.9216	451	34.9216	536	34.9216	459	34.9216	428	34.9216	464	34.9216	445	34.9216	442
	34.9383	418	34.9383	531	34.9383	424	34.9383	458	34.9383	415	34.9383	446	34.9383	433
	34.955	438	34.955	505	34.955	469	34.955	414	34.955	475	34.955	433	34.955	417
	34.9717	397	34.9717	549	34.9717	441	34.9717	416	34.9717	471	34.9717	476	34.9717	390
	34.9884	390	34.9884	576	34.9884	480	34.9884	440	34.9884	468	34.9884	427	34.9884	407
	35.0051	425	35.0051	619	35.0051	437	35.0051	418	35.0051	424	35.0051	482	35.0051	423
	35.0218	415	35.0218	650	35.0218	468	35.0218	445	35.0218	441	35.0218	488	35.0218	440
	35.0385	402	35.0385	696	35.0385	565	35.0385	456	35.0385	443	35.0385	497	35.0385	409
	35.0553	436	35.0553	744	35.0553	539	35.0553	458	35.0553	464	35.0553	470	35.0553	438
	35.072	432	35.072	866	35.072	610	35.072	436	35.072	478	35.072	459	35.072	459
	35.0887	434	35.0887	966	35.0887	658	35.0887	497	35.0887	404	35.0887	508	35.0887	497
	35.1054	424	35.1054	1055	35.1054	583	35.1054	477	35.1054	482	35.1054	521	35.1054	512
	35.1221	398	35.1221	1150	35.1221	585	35.1221	506	35.1221	495	35.1221	521	35.1221	491
	35.1388	439	35.1388	1137	35.1388	540	35.1388	464	35.1388	478	35.1388	530	35.1388	491
	35.1555	450	35.1555	1066	35.1555	451	35.1555	463	35.1555	454	35.1555	529	35.1555	467
	35.1722	403	35.1722	1058	35.1722	530	35.1722	436	35.1722	444	35.1722	537	35.1722	487
	35.1889	427	35.1889	1071	35.1889	457	35.1889	453	35.1889	501	35.1889	492	35.1889	512
	35.2056	393	35.2056	1146	35.2056	508	35.2056	443	35.2056	464	35.2056	441	35.2056	509
	35.2224	421	35.2224	1206	35.2224	475	35.2224	450	35.2224	483	35.2224	471	35.2224	454
	35.2391	442	35.2391	1237	35.2391	448	35.2391	427	35.2391	471	35.2391	456	35.2391	460
	35.2558	389	35.2558	1365	35.2558	444	35.2558	436	35.2558	454	35.2558	485	35.2558	467
	35.2725	423	35.2725	1288	35.2725	399	35.2725	470	35.2725	440	35.2725	454	35.2725	501
	35.2892	482	35.2892	1329	35.2892	445	35.2892	401	35.2892	453	35.2892	460	35.2892	481
	35.3059	485	35.3059	1323	35.3059	461	35.3059	422	35.3059	405	35.3059	457	35.3059	421
	35.3226	496	35.3226	1318	35.3226	419	35.3226	421	35.3226	481	35.3226	428	35.3226	438
	35.3393	524	35.3393	1262	35.3393	410	35.3393	425	35.3393	481	35.3393	503	35.3393	458
[truncated: 2,672 more rows]

## Sheet: KM - Eunice Bluff
Bulk Soil Observed Pattern (Cu Kα)							Clay-Size Fraction Observed Patterns (Co Kα)							Clay-Size Fraction Rietveld Fits
EB6 (43-53 cm)		EB3 (13-23 cm)		EB1 (0-3 cm)			EB6 (43-53 cm)		EB3 (13-23 cm)		EB1 (0-3 cm)			EB6 (43-53 cm)			EB3 (13-23 cm)			EB1 (0-3 cm)
2θ	pattern	2θ	pattern	2θ	pattern		2θ	pattern	2θ	pattern	2θ	pattern		2θ	fit	Background	2θ	fit	Background	2θ	fit	Background
4.0099	10.7708	4.0099	9.65	4.0099	7.9583		2.00836	7147	2.00836	5832	2.00836	7061		3.011	2192.24	2191.76	3.011	1957.79	1957.37	3.011	2100.46	2100.05
4.0298	11.0625	4.0298	10.35	4.0298	8.625		2.02507	7098	2.02507	5843	2.02507	6865		3.0277	2172.6	2172.11	3.0277	1942.59	1942.17	3.0277	2082	2081.58
4.0496	10.875	4.0496	10.46	4.0496	8.7917		2.04178	6856	2.04178	5599	2.04178	6336		3.0445	2152.18	2151.69	3.0445	1926.56	1926.13	3.0445	2062.84	2062.42
4.0694	10.7708	4.0694	10.23	4.0694	7.8333		2.05849	6805	2.05849	5541	2.05849	6201		3.0612	2131.08	2130.59	3.0612	1909.79	1909.36	3.0612	2043.07	2042.65
4.0893	10.9583	4.0893	10.17	4.0893	9.1042		2.0752	6596	2.0752	5410	2.0752	6073		3.0779	2109.41	2108.92	3.0779	1892.41	1891.98	3.0779	2022.8	2022.38
4.1091	10.2917	4.1091	10.5	4.1091	8.8542		2.09191	6355	2.09191	5370	2.09191	5833		3.0946	2087.28	2086.79	3.0946	1874.5	1874.07	3.0946	2002.13	2001.7
4.129	11.0625	4.129	9.5	4.129	8.2917		2.10862	6095	2.10862	5184	2.10862	5784		3.1113	2064.73	2064.24	3.1113	1856.11	1855.67	3.1113	1981.07	1980.65
4.1488	11.5	4.1488	11.17	4.1488	8.7917		2.12533	5779	2.12533	5080	2.12533	5642		3.128	2041.87	2041.37	3.128	1837.32	1836.89	3.128	1959.73	1959.31
4.1686	11.4583	4.1686	10.42	4.1686	8.7917		2.14205	5615	2.14205	5067	2.14205	5441		3.1447	2018.76	2018.26	3.1447	1818.22	1817.78	3.1447	1938.18	1937.75
4.1885	12.2917	4.1885	10.02	4.1885	8.9583		2.15876	5517	2.15876	4835	2.15876	5313		3.1614	1995.46	1994.96	3.1614	1798.85	1798.41	3.1614	1916.45	1916.02
4.2083	12.8269	4.2083	10.35	4.2083	8.9231		2.17547	5503	2.17547	4779	2.17547	5245		3.1781	1972.04	1971.53	3.1781	1779.28	1778.84	3.1781	1894.61	1894.18
4.2282	11.8654	4.2282	10.73	4.2282	8.6346		2.19218	5368	2.19218	4543	2.19218	5191		3.1949	1948.53	1948.02	3.1949	1759.55	1759.1	3.1949	1872.69	1872.26
4.248	13.0192	4.248	9.79	4.248	9.3654		2.20889	5050	2.20889	4453	2.20889	4943		3.2116	1925	1924.49	3.2116	1739.71	1739.26	3.2116	1850.76	1850.32
4.2678	12.9808	4.2678	9.38	4.2678	8.9231		2.2256	5220	2.2256	4344	2.2256	4813		3.2283	1901.49	1900.98	3.2283	1719.81	1719.36	3.2283	1828.84	1828.4
4.2877	13.3462	4.2877	10.81	4.2877	8.1731		2.24231	4913	2.24231	4353	2.24231	4806		3.245	1878.04	1877.52	3.245	1699.88	1699.43	3.245	1806.97	1806.53
4.3075	11.8269	4.3075	10.21	4.3075	9.9231		2.25902	4940	2.25902	4260	2.25902	4607		3.2617	1854.68	1854.16	3.2617	1679.97	1679.51	3.2617	1785.19	1784.74
4.3273	13.1346	4.3273	11.31	4.3273	8.8654		2.27574	4760	2.27574	4208	2.27574	4657		3.2784	1831.45	1830.93	3.2784	1660.1	1659.64	3.2784	1763.51	1763.07
4.3472	13.0192	4.3472	9.81	4.3472	9.3077		2.29245	4576	2.29245	4168	2.29245	4582		3.2951	1808.38	1807.86	3.2951	1640.31	1639.84	3.2951	1741.98	1741.53
4.367	12.0385	4.367	10.13	4.367	9		2.30916	4574	2.30916	4023	2.30916	4422		3.3118	1785.49	1784.97	3.3118	1620.61	1620.15	3.3118	1720.61	1720.16
4.3869	11.75	4.3869	11.1	4.3869	10.3654		2.32587	4487	2.32587	3988	2.32587	4396		3.3286	1762.8	1762.27	3.3286	1601.03	1600.56	3.3286	1699.41	1698.95
4.4067	12.1731	4.4067	10.37	4.4067	9.0192		2.34258	4325	2.34258	3924	2.34258	4259		3.3453	1740.34	1739.81	3.3453	1581.6	1581.13	3.3453	1678.42	1677.97
4.4265	12.4038	4.4265	10.9	4.4265	9.4808		2.35929	4275	2.35929	3906	2.35929	4306		3.362	1718.14	1717.6	3.362	1562.35	1561.87	3.362	1657.65	1657.2
4.4464	12.3462	4.4464	10.5	4.4464	9.3077		2.376	4375	2.376	3759	2.376	4007		3.3787	1696.19	1695.65	3.3787	1543.27	1542.79	3.3787	1637.12	1636.66
4.4662	13.1786	4.4662	10.07	4.4662	9.2143		2.39271	4148	2.39271	3568	2.39271	4008		3.3954	1674.52	1673.98	3.3954	1524.39	1523.91	3.3954	1616.83	1616.37
4.4861	11.5714	4.4861	10.73	4.4861	10.5714		2.40943	4067	2.40943	3686	2.40943	3840		3.4121	1653.14	1652.6	3.4121	1505.72	1505.25	3.4121	1596.8	1596.34
4.5059	12.5	4.5059	10.91	4.5059	10.0357		2.42614	3989	2.42614	3558	2.42614	3844		3.4288	1632.06	1631.52	3.4288	1487.28	1486.8	3.4288	1577.04	1576.58
4.5257	13.875	4.5257	11.07	4.5257	9.5357		2.44285	3839	2.44285	3592	2.44285	3964		3.4455	1611.29	1610.74	3.4455	1469.08	1468.6	3.4455	1557.55	1557.09
4.5456	12.1786	4.5456	11.39	4.5456	9.3929		2.45956	3941	2.45956	3411	2.45956	3750		3.4622	1590.83	1590.28	3.4622	1451.11	1450.62	3.4622	1538.34	1537.87
4.5654	12.7857	4.5654	10.84	4.5654	9.4821		2.47627	3793	2.47627	3418	2.47627	3592		3.4789	1570.7	1570.15	3.4789	1433.4	1432.91	3.4789	1519.43	1518.96
4.5853	13.7321	4.5853	11.25	4.5853	9.2321		2.49298	3737	2.49298	3305	2.49298	3674		3.4957	1550.9	1550.35	3.4957	1415.95	1415.46	3.4957	1500.81	1500.34
4.6051	12.8571	4.6051	11.52	4.6051	9.6071		2.50969	3691	2.50969	3291	2.50969	3526		3.5124	1531.44	1530.88	3.5124	1398.77	1398.27	3.5124	1482.49	1482.02
4.6249	12.2143	4.6249	10.7	4.6249	9.2857		2.52641	3561	2.52641	3258	2.52641	3522		3.5291	1512.3	1511.74	3.5291	1381.85	1381.35	3.5291	1464.47	1463.99
4.6448	13.8036	4.6448	10.79	4.6448	10.2143		2.54312	3541	2.54312	3249	2.54312	3385		3.5458	1493.51	1492.95	3.5458	1365.2	1364.71	3.5458	1446.75	1446.27
4.6646	12.8393	4.6646	11.46	4.6646	9.5893		2.55983	3455	2.55983	3091	2.55983	3347		3.5625	1475.06	1474.49	3.5625	1348.84	1348.33	3.5625	1429.34	1428.86
4.6845	14.4107	4.6845	10.7	4.6845	9.7857		2.57654	3340	2.57654	3012	2.57654	3117		3.5792	1456.94	1456.37	3.5792	1332.74	1332.23	3.5792	1412.22	1411.74
4.7043	13.3571	4.7043	12.36	4.7043	10.1964		2.59325	3382	2.59325	2963	2.59325	3183		3.5959	1439.16	1438.59	3.5959	1316.93	1316.42	3.5959	1395.41	1394.93
4.7241	14.0357	4.7241	10.98	4.7241	9.3214		2.60996	3202	2.60996	2888	2.60996	3227		3.6126	1421.73	1421.15	3.6126	1301.4	1300.88	3.6126	1378.91	1378.43
4.744	12.7857	4.744	11.21	4.744	10.7143		2.62667	3079	2.62667	2893	2.62667	3078		3.6294	1404.63	1404.05	3.6294	1286.14	1285.63	3.6294	1362.72	1362.23
4.7638	13.3393	4.7638	10.95	4.7638	10.6071		2.64338	3099	2.64338	2822	2.64338	2986		3.6461	1387.86	1387.28	3.6461	1271.17	1270.65	3.6461	1346.82	1346.33
4.7837	12.9821	4.7837	11.86	4.7837	10.2679		2.6601	3062	2.6601	2789	2.6601	3003		3.6628	1371.43	1370.84	3.6628	1256.47	1255.95	3.6628	1331.22	1330.72
4.8035	13.5893	4.8035	11.68	4.8035	10.0179		2.67681	3122	2.67681	2770	2.67681	2918		3.6795	1355.32	1354.73	3.6795	1242.05	1241.53	3.6795	1315.92	1315.42
4.8233	13.7321	4.8233	11.16	4.8233	11.1964		2.69352	2989	2.69352	2780	2.69352	2922		3.6962	1339.55	1338.95	3.6962	1227.91	1227.38	3.6962	1300.91	1300.41
4.8432	14.5	4.8432	11.73	4.8432	10.5893		2.71023	2977	2.71023	2561	2.71023	2827		3.7129	1324.08	1323.48	3.7129	1214.03	1213.5	3.7129	1286.18	1285.68
4.863	13.6833	4.863	11.05	4.863	10.6		2.72694	2930	2.72694	2621	2.72694	2820		3.7296	1308.94	1308.34	3.7296	1200.43	1199.9	3.7296	1271.75	1271.25
4.8828	13.6	4.8828	12.13	4.8828	10.5667		2.74365	2823	2.74365	2633	2.74365	2746		3.7463	1294.12	1293.51	3.7463	1187.1	1186.56	3.7463	1257.6	1257.1
4.9027	13.6333	4.9027	11.13	4.9027	11.1833		2.76036	2873	2.76036	2549	2.76036	2770		3.763	1279.6	1278.99	3.763	1174.03	1173.49	3.763	1243.74	1243.23
4.9225	14.2333	4.9225	11.92	4.9225	11.4667		2.77707	2754	2.77707	2460	2.77707	2691		3.7798	1265.38	1264.77	3.7798	1161.22	1160.68	3.7798	1230.14	1229.63
4.9424	13.25	4.9424	11.88	4.9424	10.9833		2.79379	2802	2.79379	2424	2.79379	2553		3.7965	1251.47	1250.85	3.7965	1148.67	1148.13	3.7965	1216.82	1216.31
4.9622	13.3667	4.9622	12.33	4.9622	10.6333		2.8105	2659	2.8105	2418	2.8105	2599		3.8132	1237.85	1237.23	3.8132	1136.38	1135.83	3.8132	1203.77	1203.25
4.982	14.1	4.982	12.23	4.982	10.7667		2.82721	2620	2.82721	2405	2.82721	2486		3.8299	1224.52	1223.9	3.8299	1124.33	1123.78	3.8299	1190.98	1190.46
5.0019	13.6333	5.0019	12.22	5.0019	11.7333		2.84392	2618	2.84392	2336	2.84392	2510		3.8466	1211.47	1210.84	3.8466	1112.53	1111.97	3.8466	1178.44	1177.92
5.0217	13.6833	5.0217	11.28	5.0217	11.7		2.86063	2576	2.86063	2292	2.86063	2487		3.8633	1198.7	1198.06	3.8633	1100.97	1100.41	3.8633	1166.17	1165.64
5.0416	13.9833	5.0416	12.75	5.0416	11.4667		2.87734	2536	2.87734	2247	2.87734	2438		3.88	1186.21	1185.56	3.88	1089.65	1089.08	3.88	1154.14	1153.6
5.0614	14.6667	5.0614	12.53	5.0614	10.65		2.89405	2543	2.89405	2290	2.89405	2328		3.8967	1173.98	1173.33	3.8967	1078.57	1078	3.8967	1142.35	1141.82
5.0812	13.8333	5.0812	13.22	5.0812	11.9		2.91076	2332	2.91076	2163	2.91076	2370		3.9134	1162.01	1161.36	3.9134	1067.71	1067.14	3.9134	1130.81	1130.27
5.1011	14.2667	5.1011	12.3	5.1011	10.9333		2.92748	2431	2.92748	2225	2.92748	2238		3.9302	1150.3	1149.65	3.9302	1057.08	1056.5	3.9302	1119.5	1118.96
5.1209	13.1333	5.1209	13	5.1209	11.4167		2.94419	2274	2.94419	2049	2.94419	2159		3.9469	1138.84	1138.18	3.9469	1046.67	1046.09	3.9469	1108.42	1107.87
5.1408	15.3	5.1408	12.12	5.1408	12.0667		2.9609	2351	2.9609	2038	2.9609	2342		3.9636	1127.63	1126.97	3.9636	1036.48	1035.89	3.9636	1097.57	1097.02
5.1606	14.6719	5.1606	12.3	5.1606	11.5938		2.97761	2223	2.97761	2076	2.97761	2160		3.9803	1116.65	1115.98	3.9803	1026.5	1025.9	3.9803	1086.93	1086.37
5.1804	14.7344	5.1804	13.11	5.1804	11.7031		2.99432	2328	2.99432	2074	2.99432	2222		3.997	1105.91	1105.24	3.997	1016.72	1016.12	3.997	1076.51	1075.95
5.2003	14.1875	5.2003	12.91	5.2003	12.7969		3.01103	2279	3.01103	1990	3.01103	2050		4.0137	1095.4	1094.72	4.0137	1007.16	1006.55	4.0137	1066.3	1065.74
5.2201	14.2813	5.2201	12.52	5.2201	11.875		3.02774	2300	3.02774	2078	3.02774	2169		4.0304	1085.12	1084.43	4.0304	997.79	997.18	4.0304	1056.31	1055.74
5.24	14.5156	5.24	13.17	5.24	12.0156		3.04445	2151	3.04445	1948	3.04445	2078		4.0471	1075.04	1074.36	4.0471	988.61	987.99	4.0471	1046.51	1045.94
5.2598	14.9063	5.2598	13.13	5.2598	12.0313		3.06117	2156	3.06117	1899	3.06117	2088		4.0638	1065.19	1064.5	4.0638	979.62	979	4.0638	1036.91	1036.33
5.2796	15.5625	5.2796	12.81	5.2796	12.0781		3.07788	2143	3.07788	1912	3.07788	2105		4.0806	1055.54	1054.85	4.0806	970.82	970.2	4.0806	1027.5	1026.92
5.2995	15.7031	5.2995	13.02	5.2995	12.3906		3.09459	2030	3.09459	1844	3.09459	1964		4.0973	1046.1	1045.4	4.0973	962.2	961.58	4.0973	1018.28	1017.7
5.3193	15.125	5.3193	12.5	5.3193	12.3281		3.1113	2082	3.1113	1900	3.1113	1963		4.114	1036.85	1036.14	4.114	953.76	953.12	4.114	1009.24	1008.66
5.3392	14.3281	5.3392	13.23	5.3392	11.7031		3.12801	1983	3.12801	1874	3.12801	1896		4.1307	1027.8	1027.08	4.1307	945.49	944.85	4.1307	1000.39	999.8
5.359	15.3594	5.359	12.67	5.359	12.2188		3.14472	2031	3.14472	1780	3.14472	1984		4.1474	1018.93	1018.21	4.1474	937.39	936.75	4.1474	991.71	991.12
5.3788	15.5313	5.3788	13.94	5.3788	13.2969		3.16143	2002	3.16143	1745	3.16143	1891		4.1641	1010.25	1009.52	4.1641	929.46	928.81	4.1641	983.2	982.6
5.3987	15.5938	5.3987	13.55	5.3987	12.7031		3.17814	1943	3.17814	1698	3.17814	1857		4.1808	1001.74	1001.01	4.1808	921.68	921.03	4.1808	974.86	974.26
5.4185	15.7031	5.4185	13.83	5.4185	12.9688		3.19486	1898	3.19486	1771	3.19486	1880		4.1975	993.41	992.67	4.1975	914.06	913.41	4.1975	966.68	966.08
5.4383	16.4375	5.4383	13.31	5.4383	12.9375		3.21157	1827	3.21157	1782	3.21157	1828		4.2142	985.25	984.51	4.2142	906.6	905.94	4.2142	958.66	958.05
5.4582	16.0313	5.4582	12.44	5.4582	12.7188		3.22828	1833	3.22828	1713	3.22828	1893		4.2309	977.25	976.5	4.2309	899.29	898.62	4.2309	950.8	950.19
5.478	15.75	5.478	13.97	5.478	12.7188		3.24499	1919	3.24499	1645	3.24499	1860		4.2477	969.41	968.65	4.2477	892.11	891.44	4.2477	943.08	942.46
5.4979	15.7188	5.4979	13.56	5.4979	13.5		3.2617	1854	3.2617	1642	3.2617	1758		4.2644	961.73	960.97	4.2644	885.09	884.41	4.2644	935.52	934.9
5.5177	16.2647	5.5177	13.51	5.5177	13.2647		3.27841	1814	3.27841	1610	3.27841	1734		4.2811	954.2	953.43	4.2811	878.2	877.51	4.2811	928.1	927.47
5.5375	15.5147	5.5375	14.43	5.5375	13.1029		3.29512	1800	3.29512	1725	3.29512	1722		4.2978	946.82	946.04	4.2978	871.45	870.75	4.2978	920.82	920.19
5.5574	16.1029	5.5574	14.12	5.5574	12.8235		3.31183	1827	3.31183	1613	3.31183	1686		4.3145	939.58	938.8	4.3145	864.82	864.12	4.3145	913.68	913.04
5.5772	15.4559	5.5772	13.5	5.5772	14.1324		3.32855	1736	3.32855	1536	3.32855	1714		4.3312	932.48	931.69	4.3312	858.32	857.62	4.3312	906.66	906.02
5.5971	17.2353	5.5971	14.29	5.5971	14.0735		3.34526	1776	3.34526	1514	3.34526	1630		4.3479	925.51	924.72	4.3479	851.95	851.24	4.3479	899.78	899.14
5.6169	15.9706	5.6169	14.26	5.6169	13.6324		3.36197	1686	3.36197	1600	3.36197	1608		4.3646	918.68	917.88	4.3646	845.7	844.99	4.3646	893.03	892.38
5.6367	17.4412	5.6367	15.1	5.6367	13.1765		3.37868	1716	3.37868	1491	3.37868	1628		4.3814	911.98	911.17	4.3814	839.57	838.84	4.3814	886.4	885.74
5.6566	16.3971	5.6566	15.29	5.6566	13.7647		3.39539	1649	3.39539	1523	3.39539	1601		4.3981	905.4	904.58	4.3981	833.55	832.82	4.3981	879.89	879.22
5.6764	17.5147	5.6764	14.84	5.6764	13.7206		3.4121	1609	3.4121	1447	3.4121	1589		4.4148	898.95	898.12	4.4148	827.65	826.91	4.4148	873.49	872.82
5.6963	17.8971	5.6963	15.38	5.6963	13.5882		3.42881	1486	3.42881	1518	3.42881	1570		4.4315	892.61	891.78	4.4315	821.86	821.11	4.4315	867.22	866.54
5.7161	17.7353	5.7161	15.12	5.7161	14.6176		3.44552	1573	3.44552	1464	3.44552	1566		4.4482	886.39	885.55	4.4482	816.17	815.41	4.4482	861.05	860.37
5.7359	17.8676	5.7359	15.44	5.7359	14.25		3.46224	1595	3.46224	1466	3.46224	1552		4.4649	880.28	879.43	4.4649	810.58	809.82	4.4649	854.99	854.3
5.7558	17.6471	5.7558	14.87	5.7558	14.7647		3.47895	1547	3.47895	1410	3.47895	1530		4.4816	874.27	873.42	4.4816	805.09	804.32	4.4816	849.04	848.35
5.7756	17.4853	5.7756	15.34	5.7756	14.0294		3.49566	1550	3.49566	1389	3.49566	1451		4.4983	868.38	867.51	4.4983	799.7	798.93	4.4983	843.19	842.49
5.7955	18.2941	5.7955	14.56	5.7955	14.25		3.51237	1512	3.51237	1393	3.51237	1444		4.5151	862.58	861.71	4.5151	794.41	793.62	4.5151	837.44	836.73
5.8153	18.1176	5.8153	15.1	5.8153	15.1324		3.52908	1496	3.52908	1375	3.52908	1520		4.5318	856.89	856.01	4.5318	789.21	788.41	4.5318	831.78	831.08
5.8351	18.2941	5.8351	15.09	5.8351	14.9706		3.54579	1489	3.54579	1390	3.54579	1402		4.5485	851.29	850.4	4.5485	784.1	783.3	4.5485	826.23	825.51
5.855	18.8333	5.855	15.46	5.855	14.7639		3.5625	1459	3.5625	1330	3.5625	1447		4.5652	845.79	844.89	4.5652	779.07	778.27	4.5652	820.77	820.04
5.8748	19.0694	5.8748	15.03	5.8748	15.5278		3.57922	1477	3.57922	1226	3.57922	1386		4.5819	840.38	839.47	4.5819	774.14	773.32	4.5819	815.4	814.67
5.8947	19.6111	5.8947	15.99	5.8947	14.8611		3.59593	1447	3.59593	1319	3.59593	1395		4.5986	835.06	834.14	4.5986	769.29	768.46	4.5986	810.11	809.38
5.9145	19.3333	5.9145	16.65	5.9145	15.4583		3.61264	1427	3.61264	1232	3.61264	1394		4.6153	829.83	828.9	4.6153	764.51	763.68	4.6153	804.92	804.17
5.9343	19.3611	5.9343	16.01	5.9343	15.2222		3.62935	1506	3.62935	1270	3.62935	1328		4.632	824.67	823.74	4.632	759.82	758.97	4.632	799.8	799.05
5.9542	20.3611	5.9542	15.86	5.9542	16.7222		3.64606	1421	3.64606	1268	3.64606	1399		4.6487	819.6	818.66	4.6487	755.19	754.34	4.6487	794.76	794.01
5.974	20.2917	5.974	16.28	5.974	16.0694		3.66277	1344	3.66277	1261	3.66277	1302		4.6654	814.61	813.66	4.6654	750.65	749.79	4.6654	789.81	789.05
5.9938	20.7778	5.9938	17.01	5.9938	15.6944		3.67948	1383	3.67948	1247	3.67948	1335		4.6822	809.7	808.74	4.6822	746.18	745.31	4.6822	784.94	784.17
6.0137	20.6528	6.0137	16.81	6.0137	16.9861		3.69619	1353	3.69619	1281	3.69619	1318		4.6989	804.87	803.9	4.6989	741.78	740.9	4.6989	780.14	779.37
6.0335	21.1944	6.0335	16.99	6.0335	17.2778		3.71291	1342	3.71291	1199	3.71291	1292		4.7156	800.11	799.12	4.7156	737.45	736.56	4.7156	775.42	774.63
6.0534	21.4167	6.0534	17.72	6.0534	17.625		3.72962	1248	3.72962	1224	3.72962	1180		4.7323	795.42	794.43	4.7323	733.19	732.29	4.7323	770.77	769.98
6.0732	22.0972	6.0732	18.76	6.0732	17.3889		3.74633	1289	3.74633	1179	3.74633	1258		4.749	790.8	789.79	4.749	728.99	728.08	4.749	766.19	765.39
6.093	22.7222	6.093	18.22	6.093	18.9861		3.76304	1298	3.76304	1142	3.76304	1285		4.7657	786.25	785.23	4.7657	724.85	723.93	4.7657	761.68	760.86
6.1129	22.8889	6.1129	19.21	6.1129	18.4861		3.77975	1248	3.77975	1161	3.77975	1206		4.7824	781.77	780.73	4.7824	720.78	719.84	4.7824	757.23	756.41
6.1327	23.7917	6.1327	18.46	6.1327	18.5		3.79646	1231	3.79646	1178	3.79646	1161		4.7991	777.34	776.3	4.7991	716.76	715.82	4.7991	752.85	752.02
6.1526	23.0132	6.1526	19.92	6.1526	18.3816		3.81317	1222	3.81317	1151	3.81317	1227		4.8159	772.98	771.93	4.8159	712.81	711.86	4.8159	748.53	747.7
6.1724	24.8684	6.1724	19.87	6.1724	18.8289		3.82988	1268	3.82988	1139	3.82988	1234		4.8326	768.68	767.62	4.8326	708.91	707.95	4.8326	744.28	743.44
6.1922	23.0658	6.1922	19.12	6.1922	19.2237		3.8466	1200	3.8466	1115	3.8466	1163		4.8493	764.44	763.37	4.8493	705.07	704.09	4.8493	740.09	739.24
6.2121	23.0263	6.2121	19.55	6.2121	19.1974		3.86331	1158	3.86331	1123	3.86331	1114		4.866	760.26	759.17	4.866	701.28	700.29	4.866	735.96	735.1
6.2319	22.6316	6.2319	19.22	6.2319	19.1842		3.88002	1178	3.88002	1085	3.88002	1178		4.8827	756.14	755.04	4.8827	697.55	696.55	4.8827	731.89	731.01
6.2518	23.0921	6.2518	19.16	6.2518	19.1316		3.89673	1133	3.89673	1138	3.89673	1172		4.8994	752.07	750.95	4.8994	693.87	692.85	4.8994	727.87	726.98
6.2716	21.6974	6.2716	19.59	6.2716	18.2763		3.91344	1184	3.91344	1038	3.91344	1129		4.9161	748.06	746.92	4.9161	690.24	689.21	4.9161	723.91	723.01
6.2914	20.2763	6.2914	18.46	6.2914	18.0395		3.93015	1168	3.93015	1128	3.93015	1132		4.9328	744.09	742.94	4.9328	686.66	685.61	4.9328	720	719.1
6.3113	19.5395	6.3113	17.75	6.3113	17.2895		3.94686	1156	3.94686	1107	3.94686	1140		4.9495	740.18	739.02	4.9495	683.12	682.06	4.9495	716.15	715.23
6.3311	20.6184	6.3311	17.83	6.3311	17.6711		3.96357	1183	3.96357	1019	3.96357	1003		4.9662	736.31	735.14	4.9662	679.62	678.56	4.9662	712.34	711.42
6.351	20.2105	6.351	17.8	6.351	17.2105		3.98029	1193	3.98029	1016	3.98029	1180		4.983	732.49	731.31	4.983	676.18	675.1	4.983	708.59	707.66
6.3708	20.2368	6.3708	18.32	6.3708	16.7895		3.997	1137	3.997	1037	3.997	1095		4.9997	728.73	727.53	4.9997	672.78	671.69	4.9997	704.89	703.94
6.3906	21.5789	6.3906	17.18	6.3906	16.7368		4.01371	1181	4.01371	984	4.01371	1062		5.0164	725.01	723.79	5.0164	669.43	668.32	5.0164	701.23	700.28
6.4105	19.6711	6.4105	17.34	6.4105	16.6053		4.03042	1094	4.03042	985	4.03042	995		5.0331	721.33	720.1	5.0331	666.12	664.99	5.0331	697.63	696.66
6.4303	21.0526	6.4303	17.57	6.4303	16.8421		4.04713	1076	4.04713	978	4.04713	1038		5.0498	717.7	716.45	5.0498	662.85	661.71	5.0498	694.07	693.09
6.4502	20.0263	6.4502	17.62	6.4502	17.6711		4.06384	1052	4.06384	1037	4.06384	1111		5.0665	714.12	712.84	5.0665	659.62	658.46	5.0665	690.55	689.56
6.47	20.3158	6.47	17.04	6.47	17.5395		4.08055	1069	4.08055	1027	4.08055	1067		5.0832	710.57	709.28	5.0832	656.43	655.25	5.0832	687.09	686.08
6.4898	19.7763	6.4898	17.39	6.4898	16.9737		4.09726	1077	4.09726	992	4.09726	1048		5.0999	707.07	705.76	5.0999	653.28	652.08	5.0999	683.66	682.64
6.5097	20.6711	6.5097	17.05	6.5097	15.7895		4.11398	1078	4.11398	954	4.11398	1058		5.1166	703.6	702.27	5.1166	650.17	648.95	5.1166	680.28	679.24
6.5295	19.5875	6.5295	17.25	6.5295	16.9375		4.13069	1027	4.13069	921	4.13069	1068		5.1334	700.18	698.83	5.1334	647.09	645.86	5.1334	676.94	675.89
6.5493	20.1	6.5493	17.29	6.5493	17.3125		4.1474	1058	4.1474	970	4.1474	1013		5.1501	696.78	695.42	5.1501	644.04	642.8	5.1501	673.63	672.57
6.5692	20.2125	6.5692	16.6	6.5692	16.75		4.16411	967	4.16411	973	4.16411	1021		5.1668	693.43	692.05	5.1668	641.04	639.77	5.1668	670.37	669.3
6.589	20.1875	6.589	17	6.589	17.3875		4.18082	1048	4.18082	995	4.18082	990		5.1835	690.12	688.72	5.1835	638.07	636.78	5.1835	667.15	666.06
6.6089	20.7125	6.6089	17.14	6.6089	17.5125		4.19753	996	4.19753	908	4.19753	956		5.2002	686.85	685.42	5.2002	635.13	633.82	5.2002	663.97	662.86
6.6287	20.75	6.6287	17.15	6.6287	15.925		4.21424	1098	4.21424	942	4.21424	938		5.2169	683.61	682.16	5.2169	632.23	630.9	5.2169	660.83	659.7
6.6485	19.7375	6.6485	16.71	6.6485	16.95		4.23095	965	4.23095	889	4.23095	902		5.2336	680.41	678.93	5.2336	629.36	628	5.2336	657.72	656.58
6.6684	21.2125	6.6684	17	6.6684	16.95		4.24767	988	4.24767	924	4.24767	960		5.2503	677.24	675.73	5.2503	626.52	625.14	5.2503	654.65	653.49
6.6882	20.025	6.6882	17.48	6.6882	17.1125		4.26438	986	4.26438	933	4.26438	944		5.267	674.1	672.57	5.267	623.72	622.31	5.267	651.62	650.44
6.7081	20.1625	6.7081	16.94	6.7081	17.6625		4.28109	954	4.28109	863	4.28109	922		5.2838	671	669.44	5.2838	620.94	619.51	5.2838	648.62	647.42
6.7279	21.0125	6.7279	16.93	6.7279	17.05		4.2978	999	4.2978	867	4.2978	934		5.3005	667.92	666.34	5.3005	618.19	616.73	5.3005	645.66	644.44
6.7477	20.6375	6.7477	16.75	6.7477	17.775		4.31451	918	4.31451	891	4.31451	941		5.3172	664.87	663.27	5.3172	615.46	613.99	5.3172	642.72	641.49
6.7676	20.55	6.7676	17.69	6.7676	17.5125		4.33122	916	4.33122	853	4.33122	929		5.3339	661.86	660.23	5.3339	612.77	611.27	5.3339	639.82	638.57
6.7874	19.925	6.7874	17.64	6.7874	17.5125		4.34793	928	4.34793	862	4.34793	853		5.3506	658.88	657.23	5.3506	610.12	608.59	5.3506	636.96	635.69
6.8073	21.3214	6.8073	17.65	6.8073	17.3929		4.36464	916	4.36464	852	4.36464	878		5.3673	655.93	654.25	5.3673	607.49	605.93	5.3673	634.13	632.83
6.8271	20.1548	6.8271	17.48	6.8271	17.1071		4.38136	934	4.38136	845	4.38136	945		5.384	653.01	651.3	5.384	604.88	603.29	5.384	631.33	630.01
6.8469	19.7262	6.8469	17.63	6.8469	17.4881		4.39807	895	4.39807	842	4.39807	844		5.4007	650.13	648.37	5.4007	602.31	600.68	5.4007	628.56	627.22
6.8668	21.2262	6.8668	17.98	6.8668	17.6905		4.41478	840	4.41478	861	4.41478	873		5.4174	647.27	645.48	5.4174	599.76	598.1	5.4174	625.83	624.46
6.8866	21.2143	6.8866	17.69	6.8866	17.131		4.43149	875	4.43149	847	4.43149	862		5.4342	644.43	642.61	5.4342	597.23	595.54	5.4342	623.12	621.72
6.9065	20.7262	6.9065	17.73	6.9065	17.3571		4.4482	869	4.4482	851	4.4482	918		5.4509	641.63	639.77	5.4509	594.74	593.01	5.4509	620.44	619.02
6.9263	20.7381	6.9263	17.89	6.9263	17.5119		4.46491	836	4.46491	847	4.46491	888		5.4676	638.85	636.95	5.4676	592.27	590.5	5.4676	617.8	616.34
6.9461	20.7024	6.9461	17.46	6.9461	17.2024		4.48162	881	4.48162	833	4.48162	874		5.4843	636.1	634.16	5.4843	589.82	588.01	5.4843	615.18	613.7
6.966	21.1786	6.966	16.93	6.966	16.881		4.49833	866	4.49833	803	4.49833	809		5.501	633.36	631.4	5.501	587.37	585.55	5.501	612.57	611.08
6.9858	20.7857	6.9858	17.86	6.9858	17.2262		4.51505	872	4.51505	800	4.51505	869		5.5177	630.66	628.66	5.5177	584.98	583.11	5.5177	610.01	608.48
7.0057	20.881	7.0057	18.11	7.0057	17.6071		4.53176	881	4.53176	813	4.53176	808		5.5344	627.99	625.94	5.5344	582.6	580.69	5.5344	607.48	605.92
7.0255	21.5476	7.0255	17.02	7.0255	17.0119		4.54847	892	4.54847	808	4.54847	834		5.5511	625.35	623.25	5.5511	580.25	578.3	5.5511	604.97	603.38
7.0453	21.3929	7.0453	17.51	7.0453	17.5		4.56518	809	4.56518	751	4.56518	811		5.5679	622.73	620.59	5.5679	577.93	575.92	5.5679	602.49	600.86
7.0652	20.7619	7.0652	17.88	7.0652	17.9286		4.58189	827	4.58189	748	4.58189	863		5.5846	620.13	617.94	5.5846	575.63	573.57	5.5846	600.04	598.37
7.085	20.2143	7.085	17.31	7.085	17.4881		4.5986	850	4.5986	827	4.5986	783		5.6013	617.56	615.32	5.6013	573.35	571.24	5.6013	597.61	595.91
7.1048	20.9881	7.1048	17.54	7.1048	18		4.61531	828	4.61531	764	4.61531	813		5.618	615.02	612.72	5.618	571.09	568.93	5.618	595.22	593.47
7.1247	21.6905	7.1247	17.23	7.1247	17.6429		4.63203	830	4.63203	690	4.63203	786		5.6347	612.5	610.15	5.6347	568.86	566.64	5.6347	592.84	591.06
7.1445	21.2619	7.1445	17	7.1445	17.0238		4.64874	862	4.64874	723	4.64874	796		5.6514	610.01	607.6	5.6514	566.65	564.38	5.6514	590.5	588.67
7.1644	21.2381	7.1644	17.79	7.1644	17.6548		4.66545	798	4.66545	748	4.66545	774		5.6681	607.54	605.06	5.6681	564.46	562.13	5.6681	588.18	586.3
7.1842	22.5595	7.1842	17.79	7.1842	17.0238		4.68216	782	4.68216	730	4.68216	791		5.6848	605.1	602.55	5.6848	562.29	559.89	5.6848	585.88	583.95
7.204	22.369	7.204	17.98	7.204	16.6548		4.69887	821	4.69887	765	4.69887	793		5.7015	602.64	600.06	5.7015	560.11	557.68	5.7015	583.58	581.63
7.2239	21	7.2239	17.57	7.2239	17.1705		4.71558	768	4.71558	743	4.71558	774		5.7183	600.24	597.6	5.7183	557.99	555.49	5.7183	581.33	579.33
7.2437	21.4432	7.2437	17.67	7.2437	16.3182		4.73229	774	4.73229	746	4.73229	783		5.735	597.86	595.15	5.735	555.89	553.32	5.735	579.11	577.06
7.2636	21	7.2636	17.38	7.2636	16.5341		4.749	822	4.749	782	4.749	755		5.7517	595.51	592.72	5.7517	553.81	551.17	5.7517	576.91	574.8
7.2834	22.1364	7.2834	16.72	7.2834	16.0909		4.76572	791	4.76572	729	4.76572	685		5.7684	593.19	590.32	5.7684	551.76	549.03	5.7684	574.74	572.57
7.3032	21.5568	7.3032	18.34	7.3032	17.5		4.78243	783	4.78243	701	4.78243	802		5.7851	590.89	587.93	5.7851	549.72	546.91	5.7851	572.59	570.36
7.3231	22.3523	7.3231	17.02	7.3231	16.3523		4.79914	788	4.79914	750	4.79914	776		5.8018	588.61	585.56	5.8018	547.71	544.81	5.8018	570.47	568.17
7.3429	23.0909	7.3429	16.84	7.3429	16.3636		4.81585	760	4.81585	703	4.81585	766		5.8185	586.35	583.22	5.8185	545.72	542.73	5.8185	568.37	566
7.3628	21.8977	7.3628	17.83	7.3628	16.4545		4.83256	754	4.83256	681	4.83256	777		5.8352	584.13	580.89	5.8352	543.75	540.66	5.8352	566.29	563.85
7.3826	22.8182	7.3826	17.01	7.3826	17.1023		4.84927	758	4.84927	709	4.84927	761		5.852	581.92	578.58	5.852	541.81	538.61	5.852	564.24	561.72
7.4024	21.6932	7.4024	17.94	7.4024	17.4432		4.86598	785	4.86598	650	4.86598	739		5.8687	579.74	576.29	5.8687	539.89	536.58	5.8687	562.21	559.61
7.4223	22.1023	7.4223	17.23	7.4223	17.1591		4.88269	752	4.88269	693	4.88269	726		5.8854	577.58	574.02	5.8854	537.99	534.57	5.8854	560.21	557.53
7.4421	22.25	7.4421	17.57	7.4421	16.5		4.89941	745	4.89941	682	4.89941	721		5.9021	575.38	571.76	5.9021	536.04	532.57	5.9021	558.18	555.46
7.462	22.8804	7.462	17.54	7.462	16.5761		4.91612	749	4.91612	684	4.91612	713		5.9188	573.27	569.53	5.9188	534.18	530.59	5.9188	556.22	553.41
7.4818	22.6413	7.4818	17.4	7.4818	16.5217		4.93283	757	4.93283	721	4.93283	764		5.9355	571.19	567.31	5.9355	532.35	528.62	5.9355	554.29	551.38
7.5016	22.2283	7.5016	17.89	7.5016	16.9783		4.94954	723	4.94954	665	4.94954	699		5.9522	569.13	565.11	5.9522	530.54	526.67	5.9522	552.38	549.36
7.5215	23.0652	7.5215	17.43	7.5215	17.4457		4.96625	753	4.96625	654	4.96625	730		5.9689	567.09	562.93	5.9689	528.76	524.73	5.9689	550.5	547.37
7.5413	23.413	7.5413	17.39	7.5413	16.337		4.98296	734	4.98296	664	4.98296	679		5.9856	565.09	560.77	5.9856	527	522.81	5.9856	548.64	545.39
7.5612	22.9239	7.5612	17.12	7.5612	16.9022		4.99967	751	4.99967	638	4.99967	753		6.0024	563.11	558.62	6.0024	525.26	520.91	6.0024	546.81	543.44
7.581	23.163	7.581	17.18	7.581	16.5978		5.01638	720	5.01638	618	5.01638	691		6.0191	561.15	556.49	6.0191	523.55	519.02	6.0191	545	541.5
7.6008	23.5761	7.6008	17.47	7.6008	16.0326		5.0331	750	5.0331	623	5.0331	712		6.0358	559.23	554.38	6.0358	521.87	517.15	6.0358	543.22	539.57
7.6207	23.1304	7.6207	17.27	7.6207	16.7283		5.04981	754	5.04981	663	5.04981	758		6.0525	557.34	552.28	6.0525	520.22	515.29	6.0525	541.47	537.67
7.6405	23.8043	7.6405	17.88	7.6405	16.663		5.06652	731	5.06652	627	5.06652	699		6.0692	555.47	550.2	6.0692	518.59	513.45	6.0692	539.74	535.78
7.6603	22.5109	7.6603	16.58	7.6603	17.0217		5.08323	682	5.08323	678	5.08323	660		6.0859	553.63	548.14	6.0859	516.99	511.62	6.0859	538.04	533.91
7.6802	24.1196	7.6802	17.79	7.6802	17.0543		5.09994	686	5.09994	667	5.09994	691		6.1026	551.68	546.09	6.1026	515.27	509.8	6.1026	536.25	532.06
7.7	23.9239	7.7	16.82	7.7	17.2935		5.11665	685	5.11665	616	5.11665	679		6.1193	549.9	544.06	6.1193	513.72	508	6.1193	534.6	530.22
7.7199	23.4348	7.7199	17.87	7.7199	16.6304		5.13336	686	5.13336	624	5.13336	660		6.136	548.14	542.05	6.136	512.2	506.21	6.136	532.98	528.4
7.7397	23.5	7.7397	18.11	7.7397	17.1413		5.15007	744	5.15007	635	5.15007	686		6.1527	546.43	540.05	6.1527	510.72	504.44	6.1527	531.39	526.6
7.7595	23.3913	7.7595	17.43	7.7595	16.5978		5.16679	705	5.16679	624	5.16679	651		6.1695	544.74	538.07	6.1695	509.26	502.68	6.1695	529.82	524.81
7.7794	23.6304	7.7794	16.79	7.7794	16.7609		5.1835	684	5.1835	613	5.1835	637		6.1862	543.09	536.1	6.1862	507.84	500.94	6.1862	528.29	523.04
7.7992	23.0652	7.7992	17.59	7.7992	16.75		5.20021	703	5.20021	648	5.20021	661		6.2029	541.48	534.15	6.2029	506.45	499.21	6.2029	526.79	521.29
7.8191	23.2283	7.8191	17.91	7.8191	17.0761		5.21692	682	5.21692	617	5.21692	623		6.2196	539.9	532.21	6.2196	505.1	497.49	6.2196	525.32	519.55
7.8389	23.4565	7.8389	17.03	7.8389	16.5435		5.23363	640	5.23363	621	5.23363	665		6.2363	538.36	530.29	6.2363	503.78	495.79	6.2363	523.88	517.82
7.8587	23.6087	7.8587	17.43	7.8587	17.087		5.25034	649	5.25034	618	5.25034	619		6.253	536.86	528.39	6.253	502.51	494.1	6.253	522.47	516.11
7.8786	22.9674	7.8786	17.03	7.8786	16.5652		5.26705	631	5.26705	578	5.26705	573		6.2697	535.41	526.5	6.2697	501.27	492.42	6.2697	521.1	514.42
7.8984	23.875	7.8984	17.17	7.8984	16.875		5.28376	682	5.28376	628	5.28376	630		6.2864	533.99	524.62	6.2864	500.07	490.75	6.2864	519.77	512.74
7.9183	23.8125	7.9183	17.5	7.9183	16.9375		5.30048	654	5.30048	619	5.30048	594		6.3031	532.62	522.76	6.3031	498.91	489.1	6.3031	518.46	511.07
7.9381	23.4375	7.9381	17.36	7.9381	16.5521		5.31719	638	5.31719	616	5.31719	649		6.3199	530.95	520.92	6.3199	497.45	487.46	6.3199	516.95	509.42
7.9579	24.0313	7.9579	17.18	7.9579	16.7708		5.3339	661	5.3339	592	5.3339	581		6.3366	529.64	519.09	6.3366	496.35	485.84	6.3366	515.7	507.79
7.9778	23.0833	7.9778	17.4	7.9778	17.1354		5.35061	631	5.35061	555	5.35061	635		6.3533	528.38	517.27	6.3533	495.3	484.22	6.3533	514.49	506.17
7.9976	24.3542	7.9976	17.45	7.9976	16.25		5.36732	630	5.36732	631	5.36732	617		6.37	527.17	515.47	6.37	494.29	482.62	6.37	513.32	504.56
8.0175	24.1875	8.0175	17.02	8.0175	17.1146		5.38403	639	5.38403	566	5.38403	613		6.3867	526	513.68	6.3867	493.32	481.03	6.3867	512.19	502.97
8.0373	23.9063	8.0373	16.95	8.0373	16.0833		5.40074	668	5.40074	537	5.40074	610		6.4034	524.88	511.9	6.4034	492.4	479.46	6.4034	511.09	501.39
8.0571	23.6146	8.0571	17.36	8.0571	16.375		5.41745	660	5.41745	601	5.41745	547		6.4201	523.81	510.14	6.4201	491.53	477.89	6.4201	510.04	499.82
8.077	22.9583	8.077	17.94	8.077	16.2813		5.43417	632	5.43417	573	5.43417	601		6.4368	522.79	508.4	6.4368	490.71	476.34	6.4368	509.02	498.27
8.0968	24.28	8.0968	16.48	8.0968	17.07		5.45088	613	5.45088	593	5.45088	619		6.4536	521.83	506.66	6.4536	489.94	474.8	6.4536	508.05	496.73
8.1167	24.29	8.1167	17.4	8.1167	16.86		5.46759	602	5.46759	581	5.46759	652		6.4703	520.92	504.94	6.4703	489.22	473.27	6.4703	507.13	495.21
8.1365	23.65	8.1365	17	8.1365	17.11		5.4843	613	5.4843	559	5.4843	622		6.487	520.06	503.24	6.487	488.56	471.76	6.487	506.24	493.7
8.1563	23.38	8.1563	17.32	8.1563	16.62		5.50101	601	5.50101	535	5.50101	621		6.5037	519.27	501.55	6.5037	487.96	470.25	6.5037	505.41	492.2
8.1762	23.39	8.1762	17.72	8.1762	16.89		5.51772	597	5.51772	578	5.51772	616		6.5204	518.54	499.87	6.5204	487.43	468.76	6.5204	504.63	490.71
8.196	24.01	8.196	17.77	8.196	17.26		5.53443	594	5.53443	578	5.53443	581		6.5371	517.23	498.2	6.5371	486.32	467.28	6.5371	503.44	489.24
8.2158	23.49	8.2158	17.1	8.2158	16.77		5.55114	652	5.55114	610	5.55114	585		6.5538	516.61	496.55	6.5538	485.91	465.81	6.5538	502.75	487.78
8.2357	23.99	8.2357	17.81	8.2357	16.98		5.56786	647	5.56786	596	5.56786	595		6.5705	516.08	494.91	6.5705	485.58	464.35	6.5705	502.13	486.33
8.2555	23.45	8.2555	16.81	8.2555	17.22		5.58457	578	5.58457	542	5.58457	593		6.5872	515.62	493.28	6.5872	485.34	462.9	6.5872	501.59	484.9
8.2754	23.56	8.2754	17.41	8.2754	16.83		5.60128	617	5.60128	562	5.60128	599		6.604	515.27	491.67	6.604	485.2	461.47	6.604	501.12	483.48
8.2952	24.35	8.2952	17.08	8.2952	17.51		5.61799	564	5.61799	554	5.61799	611		6.6207	515.01	490.07	6.6207	485.17	460.04	6.6207	500.73	482.06
8.315	24.31	8.315	17.57	8.315	16.31		5.6347	590	5.6347	564	5.6347	574		6.6374	514.87	488.48	6.6374	485.26	458.63	6.6374	500.43	480.66
8.3349	23.76	8.3349	17.79	8.3349	16.33		5.65141	602	5.65141	564	5.65141	539		6.6541	514.85	486.9	6.6541	485.48	457.23	6.6541	500.24	479.28
8.3547	23.77	8.3547	17.74	8.3547	17		5.66812	601	5.66812	515	5.66812	575		6.6708	514.97	485.34	6.6708	485.84	455.83	6.6708	500.15	477.9
8.3746	24.07	8.3746	17.44	8.3746	16.68		5.68484	611	5.68484	556	5.68484	567		6.6875	515.22	483.79	6.6875	486.34	454.45	6.6875	500.17	476.54
8.3944	24.08	8.3944	16.82	8.3944	16.5		5.70155	572	5.70155	578	5.70155	578		6.7042	515.64	482.25	6.7042	487.01	453.08	6.7042	500.31	475.19
8.4142	24.59	8.4142	17.54	8.4142	16.65		5.71826	565	5.71826	538	5.71826	565		6.7209	516.22	480.72	6.7209	487.85	451.72	6.7209	500.59	473.85
8.4341	24.28	8.4341	17.46	8.4341	17.39		5.73497	619	5.73497	519	5.73497	556		6.7377	516.98	479.21	6.7377	488.88	450.37	6.7377	501	472.52
8.4539	24.11	8.4539	17.02	8.4539	17.45		5.75168	588	5.75168	556	5.75168	569		6.7544	517.94	477.71	6.7544	490.1	449.03	6.7544	501.56	471.2
8.4738	24.44	8.4738	17.73	8.4738	16.53		5.76839	587	5.76839	494	5.76839	551		6.7711	518.13	476.22	6.7711	490.63	447.7	6.7711	501.61	469.89
8.4936	24.42	8.4936	16.5	8.4936	16.61		5.7851	535	5.7851	533	5.7851	564		6.7878	519.49	474.74	6.7878	492.29	446.38	6.7878	502.5	468.6
8.5134	24.48	8.5134	17.59	8.5134	16.58		5.80181	545	5.80181	599	5.80181	596		6.8045	521.1	473.27	6.8045	494.2	445.08	6.8045	503.57	467.31
8.5333	24.14	8.5333	17.79	8.5333	16.78		5.81853	556	5.81853	535	5.81853	593		6.8212	522.97	471.81	6.8212	496.38	443.78	6.8212	504.85	466.04
8.5531	24.63	8.5531	17.28	8.5531	17.57		5.83524	566	5.83524	541	5.83524	573		6.8379	525.12	470.37	6.8379	498.87	442.49	6.8379	506.36	464.77
8.573	25.24	8.573	17.39	8.573	16.49		5.85195	583	5.85195	552	5.85195	573		6.8546	527.58	468.94	6.8546	501.68	441.21	6.8546	508.1	463.52
8.5928	25.0769	8.5928	17.4	8.5928	16.8942		5.86866	594	5.86866	531	5.86866	555		6.8713	530.38	467.52	6.8713	504.85	439.94	6.8713	510.11	462.28
8.6126	24.5	8.6126	17.18	8.6126	17.0769		5.88537	536	5.88537	512	5.88537	566		6.888	533.54	466.11	6.888	508.4	438.68	6.888	512.41	461.04
8.6325	24.3942	8.6325	17.05	8.6325	16.9135		5.90208	583	5.90208	493	5.90208	572		6.9048	537.1	464.71	6.9048	512.36	437.43	6.9048	515	459.82
8.6523	24.125	8.6523	17.14	8.6523	16.8462		5.91879	607	5.91879	493	5.91879	566		6.9215	541.08	463.32	6.9215	516.77	436.2	6.9215	517.93	458.61
8.6722	24.7692	8.6722	17.36	8.6722	17.5481		5.9355	546	5.9355	481	5.9355	546		6.9382	545.53	461.94	6.9382	521.64	434.97	6.9382	521.2	457.41
8.692	23.8077	8.692	17.02	8.692	17.2692		5.95222	549	5.95222	543	5.95222	543		6.9549	550.46	460.58	6.9549	527	433.75	6.9549	524.84	456.22
8.7118	25.2019	8.7118	17.09	8.7118	16.6058		5.96893	526	5.96893	471	5.96893	533		6.9716	555.92	459.22	6.9716	532.86	432.53	6.9716	528.85	455.03
8.7317	23.9808	8.7317	16.65	8.7317	16.1827		5.98564	545	5.98564	538	5.98564	556		6.9883	561.91	457.88	6.9883	539.23	431.33	6.9883	533.24	453.86
8.7515	24.1111	8.7515	17.24	8.7515	17.0648		6.00235	509	6.00235	543	6.00235	523		7.005	568.02	456.54	7.005	545.91	430.14	7.005	537.85	452.7
8.7713	24.6574	8.7713	16.59	8.7713	16.9444		6.01906	536	6.01906	533	6.01906	543		7.0217	575.24	455.22	7.0217	553.35	428.96	7.0217	543.05	451.54
8.7912	24.9815	8.7912	17.31	8.7912	16.5463		6.03577	537	6.03577	484	6.03577	515		7.0384	583	453.91	7.0384	561.16	427.78	7.0384	548.53	450.4
8.811	24.4444	8.811	17.9	8.811	17.7685		6.05248	537	6.05248	554	6.05248	550		7.0552	591.23	452.61	7.0552	569.18	426.62	7.0552	554.19	449.26
8.8309	24.6574	8.8309	17.29	8.8309	17.5		6.06919	561	6.06919	502	6.06919	532		7.0719	599.81	451.31	7.0719	577.19	425.46	7.0719	559.87	448.14
8.8507	24.6019	8.8507	17.56	8.8507	17.8241		6.08591	565	6.08591	501	6.08591	512		7.0886	608.55	450.03	7.0886	584.86	424.32	7.0886	565.34	447.02
8.8705	24.8611	8.8705	17.19	8.8705	17.6204		6.10262	513	6.10262	470	6.10262	561		7.1053	617.18	448.76	7.1053	591.79	423.18	7.1053	570.3	445.91
8.8904	24.3889	8.8904	17.21	8.8904	17.1852		6.11933	555	6.11933	521	6.11933	555		7.122	625.32	447.5	7.122	597.46	422.05	7.122	574.4	444.81
8.9102	23.9537	8.9102	17.03	8.9102	17.0185		6.13604	532	6.13604	513	6.13604	522		7.1387	632.5	446.25	7.1387	601.32	420.93	7.1387	577.21	443.72
8.9301	24.5463	8.9301	17.8	8.9301	17.1667		6.15275	549	6.15275	522	6.15275	511		7.1554	638.11	445.01	7.1554	602.8	419.82	7.1554	578.31	442.64
8.9499	24.7593	8.9499	18	8.9499	16.8704		6.16946	591	6.16946	508	6.16946	543		7.1721	641.56	443.77	7.1721	601.45	418.72	7.1721	577.36	441.57
8.9697	24.1389	8.9697	17.31	8.9697	16.7222		6.18617	585	6.18617	506	6.18617	552		7.1889	642.26	442.55	7.1889	597.02	417.62	7.1889	574.14	440.51
8.9896	24.4167	8.9896	17.45	8.9896	17.1111		6.20288	554	6.20288	505	6.20288	494		7.2056	639.77	441.34	7.2056	589.52	416.53	7.2056	568.64	439.45
9.0094	24.5278	9.0094	17.41	9.0094	17.25		6.2196	527	6.2196	482	6.2196	514		7.2223	633.89	440.14	7.2223	579.3	415.46	7.2223	561.07	438.4
9.0293	24.2593	9.0293	17.58	9.0293	18.0463		6.23631	509	6.23631	489	6.23631	534		7.239	626.68	438.94	7.239	568.58	414.39	7.239	553.08	437.37
9.0491	25.0833	9.0491	17.88	9.0491	16.5833		6.25302	546	6.25302	511	6.25302	542		7.2557	614.7	437.76	7.2557	554.72	413.33	7.2557	542.68	436.33
9.0689	24.8889	9.0689	18.17	9.0689	17.8796		6.26973	512	6.26973	514	6.26973	526		7.2724	600.58	436.58	7.2724	540.22	412.27	7.2724	531.73	435.31
9.0888	24.7315	9.0888	17.13	9.0888	17.1481		6.28644	555	6.28644	505	6.28644	525		7.2891	585.19	435.42	7.2891	525.81	411.23	7.2891	520.78	434.3
9.1086	25.0556	9.1086	17.44	9.1086	17.4537		6.30315	551	6.30315	536	6.30315	528		7.3058	569.35	434.26	7.3058	512.03	410.19	7.3058	510.24	433.29
9.1285	24.5278	9.1285	16.99	9.1285	17.1019		6.31986	519	6.31986	521	6.31986	523		7.3225	553.81	433.12	7.3225	499.22	409.16	7.3225	500.41	432.29
9.1483	25.9815	9.1483	18.24	9.1483	16.9907		6.33657	523	6.33657	513	6.33657	483		7.3392	539.07	431.98	7.3392	487.58	408.14	7.3392	491.43	431.3
9.1681	25.6944	9.1681	17.71	9.1681	17.1296		6.35329	530	6.35329	477	6.35329	520		7.356	525.48	430.85	7.356	477.17	407.13	7.356	483.36	430.32
9.188	25.8889	9.188	18.66	9.188	16.3519		6.37	524	6.37	524	6.37	484		7.3727	513.2	429.73	7.3727	467.95	406.12	7.3727	476.18	429.34
9.2078	25.8889	9.2078	17.75	9.2078	17.5185		6.38671	536	6.38671	529	6.38671	513		7.3894	502.24	428.62	7.3894	459.82	405.13	7.3894	469.82	428.37
9.2277	26.5648	9.2277	18.72	9.2277	17.8426		6.40342	553	6.40342	483	6.40342	515		7.4061	492.55	427.51	7.4061	452.67	404.14	7.4061	464.21	427.41
9.2475	26.4352	9.2475	18.56	9.2475	17.4352		6.42013	553	6.42013	500	6.42013	483		7.4228	484.01	426.42	7.4228	446.39	403.15	7.4228	459.24	426.46
9.2673	27.4074	9.2673	18.35	9.2673	18.0833		6.43684	534	6.43684	546	6.43684	542		7.4395	476.51	425.33	7.4395	440.85	402.18	7.4395	454.84	425.51
9.2872	26.3125	9.2872	18.74	9.2872	19.0446		6.45355	521	6.45355	514	6.45355	497		7.4562	469.91	424.26	7.4562	435.94	401.21	7.4562	450.93	424.58
9.307	27.0893	9.307	19.21	9.307	19.4286		6.47026	486	6.47026	496	6.47026	497		7.4729	464.08	423.19	7.4729	431.57	400.25	7.4729	447.42	423.64
9.3268	28.8929	9.3268	19.58	9.3268	18.9286		6.48698	543	6.48698	511	6.48698	493		7.4897	459.23	422.13	7.4897	427.9	399.3	7.4897	444.44	422.72
9.3467	29.2232	9.3467	19.85	9.3467	19.9018		6.50369	577	6.50369	508	6.50369	466		7.5064	454.58	421.07	7.5064	424.35	398.36	7.5064	441.56	421.8
9.3665	29.8929	9.3665	19.76	9.3665	20.5625		6.5204	502	6.5204	493	6.5204	481		7.5231	450.41	420.03	7.5231	421.14	397.42	7.5231	438.94	420.89
9.3864	31.6638	9.3864	20.76	9.3864	20.3103		6.53711	506	6.53711	500	6.53711	482		7.5398	446.65	418.99	7.5398	418.22	396.49	7.5398	436.53	419.99
9.4062	31.7672	9.4062	21.49	9.4062	21.5		6.55382	556	6.55382	536	6.55382	493		7.5565	443.24	417.96	7.5565	415.54	395.56	7.5565	434.31	419.09
9.426	33.2672	9.426	22.46	9.426	22		6.57053	513	6.57053	500	6.57053	471		7.5732	440.13	416.94	7.5732	413.07	394.65	7.5732	432.25	418.2
9.4459	33.9914	9.4459	22.59	9.4459	23.069		6.58724	555	6.58724	466	6.58724	532		7.5899	437.27	415.93	7.5899	410.79	393.74	7.5899	430.33	417.32
9.4657	33.3966	9.4657	24.16	9.4657	22.8621		6.60395	524	6.60395	505	6.60395	508		7.6066	434.64	414.93	7.6066	408.66	392.83	7.6066	428.53	416.44
9.4856	30.3793	9.4856	22.55	9.4856	21.5172		6.62067	511	6.62067	542	6.62067	528		7.6233	432.19	413.93	7.6233	406.66	391.94	7.6233	426.84	415.57
9.5054	29.5948	9.5054	21.44	9.5054	20.319		6.63738	541	6.63738	542	6.63738	522		7.64	429.91	412.94	7.64	404.79	391.05	7.64	425.24	414.7
9.5252	27.6034	9.5252	20.17	9.5252	19.6466		6.65409	491	6.65409	473	6.65409	521		7.6568	427.77	411.96	7.6568	403.02	390.17	7.6568	423.71	413.85
9.5451	26.5862	9.5451	19.14	9.5451	18.7845		6.6708	466	6.6708	488	6.6708	505		7.6735	425.75	410.98	7.6735	401.34	389.29	7.6735	422.26	412.99
9.5649	27.2155	9.5649	18.38	9.5649	18.4828		6.68751	526	6.68751	494	6.68751	513		7.6902	423.85	410.02	7.6902	399.75	388.42	7.6902	420.87	412.15
9.5848	26.2845	9.5848	17.77	9.5848	18.4741		6.70422	509	6.70422	496	6.70422	513		7.7069	422.04	409.06	7.7069	398.22	387.56	7.7069	419.54	411.31
9.6046	26	9.6046	18.04	9.6046	17.4138		6.72093	533	6.72093	476	6.72093	526		7.7236	420.32	408.11	7.7236	396.77	386.7	7.7236	418.26	410.48
9.6244	26.6293	9.6244	18.81	9.6244	18.5948		6.73765	534	6.73765	503	6.73765	526		7.7403	418.68	407.16	7.7403	395.37	385.85	7.7403	417.02	409.65
9.6443	25.2759	9.6443	18.46	9.6443	18.0948		6.75436	540	6.75436	500	6.75436	532		7.757	417.19	406.22	7.757	394.09	385.01	7.757	415.87	408.83
9.6641	25.5086	9.6641	18.9	9.6641	18.0086		6.77107	549	6.77107	529	6.77107	499		7.7737	415.67	405.29	7.7737	392.79	384.17	7.7737	414.71	408.01
9.684	25.819	9.684	18.51	9.684	17.4483		6.78778	543	6.78778	549	6.78778	532		7.7905	414.2	404.37	7.7905	391.53	383.34	7.7905	413.58	407.2
9.7038	25.1897	9.7038	18.43	9.7038	17.6207		6.80449	553	6.80449	523	6.80449	539		7.8072	412.79	403.45	7.8072	390.31	382.52	7.8072	412.48	406.4
9.7236	25.75	9.7236	17.84	9.7236	18.1293		6.8212	526	6.8212	552	6.8212	514		7.8239	411.43	402.54	7.8239	389.12	381.7	7.8239	411.41	405.6
9.7435	25.2414	9.7435	18.84	9.7435	18.1638		6.83791	553	6.83791	495	6.83791	557		7.8406	410.1	401.64	7.8406	387.97	380.89	7.8406	410.36	404.81
9.7633	25.181	9.7633	19.25	9.7633	18.181		6.85462	522	6.85462	563	6.85462	492		7.8573	408.82	400.74	7.8573	386.85	380.08	7.8573	409.34	404.02
9.7832	26.6207	9.7832	19.97	9.7832	18.9483		6.87134	549	6.87134	579	6.87134	487		7.874	407.57	399.85	7.874	385.76	379.28	7.874	408.35	403.24
9.803	26.1638	9.803	19	9.803	17.681		6.88805	531	6.88805	557	6.88805	514		7.8907	406.35	398.97	7.8907	384.7	378.49	7.8907	407.37	402.46
9.8228	24.7845	9.8228	19.6	9.8228	18.1034		6.90476	541	6.90476	584	6.90476	503		7.9074	405.16	398.09	7.9074	383.66	377.7	7.9074	406.41	401.69
9.8427	25.0086	9.8427	19.71	9.8427	17.8793		6.92147	549	6.92147	539	6.92147	523		7.9242	404	397.22	7.9242	382.64	376.92	7.9242	405.47	400.92
9.8625	25.4052	9.8625	17.53	9.8625	17.0517		6.93818	555	6.93818	541	6.93818	537		7.9409	402.87	396.36	7.9409	381.64	376.14	7.9409	404.54	400.16
9.8823	24.6293	9.8823	18.28	9.8823	16.5948		6.95489	587	6.95489	566	6.95489	535		7.9576	401.76	395.5	7.9576	380.66	375.37	7.9576	403.63	399.41
9.9022	24.0172	9.9022	18.12	9.9022	17.1638		6.9716	579	6.9716	579	6.9716	486		7.9743	400.68	394.65	7.9743	379.7	374.6	7.9743	402.74	398.66
9.922	24.931	9.922	17.37	9.922	16.8879		6.98831	545	6.98831	581	6.98831	540		7.991	399.61	393.81	7.991	378.76	373.84	7.991	401.86	397.91
9.9419	25.4569	9.9419	17.54	9.9419	17.3534		7.00503	553	7.00503	539	7.00503	568		8.0077	398.56	392.97	8.0077	377.83	373.09	8.0077	401	397.17
9.9617	24.35	9.9617	17.82	9.9617	17.5583		7.02174	589	7.02174	611	7.02174	560		8.0244	397.56	392.14	8.0244	376.94	372.34	8.0244	400.15	396.44
9.9815	25.1833	9.9815	18	9.9815	17.8		7.03845	579	7.03845	594	7.03845	558		8.0411	396.55	391.31	8.0411	376.05	371.6	8.0411	399.31	395.7
10.0014	25.5417	10.0014	17.4	10.0014	17.8167		7.05516	658	7.05516	591	7.05516	533		8.0578	395.55	390.49	8.0578	375.16	370.86	8.0578	398.48	394.98
10.0212	25.3083	10.0212	17.53	10.0212	17.4		7.07187	589	7.07187	573	7.07187	584		8.0746	394.58	389.67	8.0746	374.29	370.13	8.0746	397.66	394.26
10.0411	25.4113	10.0411	17.69	10.0411	17.2016		7.08858	600	7.08858	604	7.08858	565		8.0913	393.61	388.86	8.0913	373.44	369.4	8.0913	396.85	393.54
10.0609	25.1694	10.0609	17.93	10.0609	16.9435		7.10529	606	7.10529	637	7.10529	558		8.108	392.67	388.06	8.108	372.6	368.68	8.108	396.05	392.83
10.0807	24.5726	10.0807	17.79	10.0807	17.3145		7.122	620	7.122	615	7.122	537		8.1247	391.73	387.26	8.1247	371.76	367.96	8.1247	395.26	392.12
10.1006	24.2339	10.1006	17.85	10.1006	17.3871		7.13872	602	7.13872	625	7.13872	561		8.1414	390.81	386.47	8.1414	370.94	367.25	8.1414	394.48	391.42
10.1204	24.9758	10.1204	17.15	10.1204	17.6855		7.15543	623	7.15543	572	7.15543	553		8.1581	389.9	385.69	8.1581	370.13	366.54	8.1581	393.7	390.72
10.1403	25.4758	10.1403	17.88	10.1403	17.4597		7.17214	637	7.17214	613	7.17214	605		8.1748	389.01	384.91	8.1748	369.33	365.84	8.1748	392.94	390.03
10.1601	24.9677	10.1601	18	10.1601	17.7661		7.18885	638	7.18885	632	7.18885	539		8.1915	388.12	384.13	8.1915	368.54	365.14	8.1915	392.18	389.34
10.1799	25.5484	10.1799	18.53	10.1799	17.4597		7.20556	663	7.20556	565	7.20556	581		8.2082	387.25	383.36	8.2082	367.76	364.45	8.2082	391.44	388.66
10.1998	25.129	10.1998	18.65	10.1998	17.6774		7.22227	613	7.22227	587	7.22227	573		8.225	386.38	382.6	8.225	366.99	363.76	8.225	390.69	387.97
10.2196	24.9597	10.2196	17.19	10.2196	17.7661		7.23898	620	7.23898	557	7.23898	569		8.2417	385.53	381.84	8.2417	366.23	363.08	8.2417	389.96	387.3
10.2395	25.0242	10.2395	18.21	10.2395	17.3629		7.25569	651	7.25569	539	7.25569	584		8.2584	384.69	381.08	8.2584	365.48	362.41	8.2584	389.23	386.63
10.2593	25.8387	10.2593	18.18	10.2593	16.9839		7.27241	591	7.27241	503	7.27241	529		8.2751	383.85	380.33	8.2751	364.73	361.73	8.2751	388.52	385.96
10.2791	24.8226	10.2791	17.94	10.2791	18.1452		7.28912	561	7.28912	500	7.28912	497		8.2918	383.03	379.59	8.2918	364	361.07	8.2918	387.8	385.29
10.299	25.7581	10.299	19.25	10.299	17.8065		7.30583	548	7.30583	487	7.30583	510		8.3085	382.22	378.85	8.3085	363.27	360.4	8.3085	387.1	384.63
10.3188	25.3387	10.3188	18.32	10.3188	18.2903		7.32254	560	7.32254	483	7.32254	553		8.3252	381.41	378.12	8.3252	362.55	359.74	8.3252	386.4	383.98
10.3387	25.9758	10.3387	18.5	10.3387	18.75		7.33925	504	7.33925	472	7.33925	518		8.3419	380.62	377.39	8.3419	361.84	359.09	8.3419	385.71	383.33
10.3585	27.0968	10.3585	19.42	10.3585	18.1048		7.35596	548	7.35596	440	7.35596	492		8.3586	379.83	376.67	8.3586	361.13	358.44	8.3586	385.02	382.68
10.3783	26.7097	10.3783	18.13	10.3783	18.8548		7.37267	507	7.37267	397	7.37267	515		8.3754	379.04	375.95	8.3754	360.43	357.8	8.3754	384.34	382.04
10.3982	26.25	10.3982	19.21	10.3982	19.1613		7.38938	537	7.38938	459	7.38938	467		8.3921	378.27	375.24	8.3921	359.74	357.16	8.3921	383.66	381.4
10.418	27.5081	10.418	18.58	10.418	19.8306		7.4061	513	7.4061	460	7.4061	472		8.4088	377.5	374.53	8.4088	359.05	356.52	8.4088	382.99	380.76
10.4378	28.5887	10.4378	19.5	10.4378	20.2742		7.42281	509	7.42281	450	7.42281	515		8.4255	376.74	373.82	8.4255	358.37	355.89	8.4255	382.32	380.13
10.4577	30.4113	10.4577	20.11	10.4577	20.3871		7.43952	556	7.43952	400	7.43952	469		8.4422	375.99	373.12	8.4422	357.7	355.26	8.4422	381.66	379.5
10.4775	31.4597	10.4775	21.56	10.4775	21.0484		7.45623	473	7.45623	405	7.45623	460		8.4589	375.24	372.43	8.4589	357.03	354.64	8.4589	381.01	378.87
10.4974	30.0887	10.4974	21.1	10.4974	22.6371		7.47294	499	7.47294	434	7.47294	478		8.4756	374.5	371.74	8.4756	356.37	354.02	8.4756	380.36	378.25
10.5172	28.879	10.5172	21.6	10.5172	23.7177		7.48965	482	7.48965	443	7.48965	427		8.4923	373.77	371.05	8.4923	355.72	353.4	8.4923	379.71	377.63
10.537	27.2581	10.537	20.43	10.537	23.5968		7.50636	519	7.50636	394	7.50636	443		8.509	373.05	370.37	8.509	355.07	352.79	8.509	379.07	377.02
10.5569	26.4113	10.5569	19.46	10.5569	23.9677		7.52307	470	7.52307	444	7.52307	433		8.5257	372.33	369.69	8.5257	354.42	352.19	8.5257	378.43	376.41
10.5767	25.3548	10.5767	18.75	10.5767	21.7419		7.53979	480	7.53979	440	7.53979	451		8.5425	371.61	369.02	8.5425	353.78	351.58	8.5425	377.8	375.8
10.5966	25.8871	10.5966	18.69	10.5966	20.2177		7.5565	510	7.5565	419	7.5565	449		8.5592	370.91	368.35	8.5592	353.15	350.99	8.5592	377.18	375.19
10.6164	24.3468	10.6164	18.38	10.6164	18.5		7.57321	487	7.57321	434	7.57321	452		8.5759	370.2	367.69	8.5759	352.52	350.39	8.5759	376.56	374.59
10.6362	25.7823	10.6362	18.35	10.6362	17.9516		7.58992	416	7.58992	450	7.58992	457		8.5926	369.51	367.03	8.5926	351.91	349.8	8.5926	375.94	374
10.6561	24.9063	10.6561	18.34	10.6561	17.7656		7.60663	433	7.60663	411	7.60663	460		8.6093	368.82	366.37	8.6093	351.29	349.21	8.6093	375.33	373.4
10.6759	25.3182	10.6759	18.18	10.6759	17.3333		7.62334	450	7.62334	394	7.62334	489		8.626	368.14	365.72	8.626	350.68	348.63	8.626	374.72	372.81
10.6958	25.3561	10.6958	18.27	10.6958	17.5455		7.64005	471	7.64005	430	7.64005	446		8.6427	367.46	365.07	8.6427	350.07	348.05	8.6427	374.11	372.22
10.7156	26.0985	10.7156	18.58	10.7156	17.4394		7.65676	411	7.65676	385	7.65676	423		8.6594	366.79	364.43	8.6594	349.47	347.48	8.6594	373.51	371.64
10.7354	25.0985	10.7354	17.81	10.7354	17.1439		7.67348	479	7.67348	417	7.67348	426		8.6761	366.12	363.79	8.6761	348.87	346.9	8.6761	372.91	371.06
10.7553	24.197	10.7553	18.07	10.7553	17.1742		7.69019	470	7.69019	417	7.69019	451		8.6929	365.45	363.15	8.6929	348.28	346.34	8.6929	372.32	370.48
10.7751	24.9697	10.7751	17.86	10.7751	17.5606		7.7069	453	7.7069	410	7.7069	421		8.7096	364.8	362.52	8.7096	347.69	345.77	8.7096	371.73	369.9
10.795	25.4924	10.795	18.04	10.795	17.4167		7.72361	452	7.72361	388	7.72361	451		8.7263	364.14	361.89	8.7263	347.11	345.21	8.7263	371.15	369.33
10.8148	24.5455	10.8148	17.76	10.8148	17.5758		7.74032	455	7.74032	407	7.74032	416		8.743	363.5	361.27	8.743	346.53	344.65	8.743	370.57	368.76
10.8346	25.0682	10.8346	18.56	10.8346	17.1818		7.75703	450	7.75703	380	7.75703	410		8.7597	362.85	360.65	8.7597	345.95	344.1	8.7597	369.99	368.19
10.8545	24.5076	10.8545	18.3	10.8545	17.2197		7.77374	433	7.77374	379	7.77374	472		8.7764	362.22	360.03	8.7764	345.38	343.55	8.7764	369.42	367.63
10.8743	25.1061	10.8743	18.55	10.8743	17.7879		7.79046	432	7.79046	440	7.79046	474		8.7931	361.58	359.42	8.7931	344.82	343	8.7931	368.85	367.07
10.8942	25.2955	10.8942	18.14	10.8942	17.3333		7.80717	481	7.80717	374	7.80717	421		8.8098	360.95	358.81	8.8098	344.26	342.46	8.8098	368.28	366.51
10.914	25.303	10.914	18.61	10.914	17.3333		7.82388	410	7.82388	379	7.82388	442		8.8266	360.33	358.21	8.8266	343.7	341.92	8.8266	367.72	365.96
10.9338	25.6212	10.9338	17.98	10.9338	17.2045		7.84059	452	7.84059	367	7.84059	415		8.8433	359.71	357.6	8.8433	343.15	341.38	8.8433	367.16	365.41
10.9537	25.4167	10.9537	18.23	10.9537	17.2879		7.8573	417	7.8573	389	7.8573	417		8.86	359.09	357	8.86	342.6	340.85	8.86	366.6	364.86
10.9735	25.9773	10.9735	18.14	10.9735	17.7727		7.87401	400	7.87401	391	7.87401	441		8.8767	358.48	356.41	8.8767	342.06	340.32	8.8767	366.05	364.31
10.9934	25.2803	10.9934	17.95	10.9934	17.3106		7.89072	403	7.89072	391	7.89072	417		8.8934	357.88	355.82	8.8934	341.52	339.79	8.8934	365.5	363.77
11.0132	25.4773	11.0132	17.64	11.0132	17.7576		7.90743	429	7.90743	385	7.90743	434		8.9101	357.28	355.23	8.9101	340.98	339.27	8.9101	364.95	363.23
11.033	25.7803	11.033	18.8	11.033	18.2576		7.92415	476	7.92415	413	7.92415	425		8.9268	356.68	354.65	8.9268	340.45	338.75	8.9268	364.41	362.69
11.0529	25.0379	11.0529	18.2	11.0529	18.0455		7.94086	412	7.94086	416	7.94086	412		8.9435	356.08	354.06	8.9435	339.92	338.23	8.9435	363.87	362.15
11.0727	25.2197	11.0727	18.58	11.0727	18.6136		7.95757	413	7.95757	387	7.95757	440		8.9602	355.49	353.49	8.9602	339.39	337.72	8.9602	363.33	361.62
11.0925	26.0076	11.0925	17.69	11.0925	17.8409		7.97428	410	7.97428	384	7.97428	421		8.977	354.91	352.91	8.977	338.87	337.21	8.977	362.8	361.09
11.1124	25.8561	11.1124	18.94	11.1124	18.3788		7.99099	432	7.99099	409	7.99099	409		8.9937	354.33	352.34	8.9937	338.35	336.7	8.9937	362.27	360.56
11.1322	25.5227	11.1322	18.5	11.1322	18.6667		8.0077	416	8.0077	392	8.0077	398		9.0104	353.75	351.77	9.0104	337.84	336.19	9.0104	361.74	360.04
11.1521	26.0076	11.1521	17.86	11.1521	18.0985		8.02441	423	8.02441	410	8.02441	401		9.0271	353.17	351.2	9.0271	337.33	335.69	9.0271	361.22	359.51
11.1719	25.4394	11.1719	17.8	11.1719	17.197		8.04112	469	8.04112	390	8.04112	450		9.0438	352.6	350.64	9.0438	336.82	335.19	9.0438	360.7	358.99
11.1917	26.0833	11.1917	18.23	11.1917	18.3106		8.05784	426	8.05784	338	8.05784	409		9.0605	352.04	350.08	9.0605	336.31	334.7	9.0605	360.18	358.47
11.2116	26.0227	11.2116	18.8	11.2116	17.7348		8.07455	388	8.07455	384	8.07455	394		9.0772	351.47	349.53	9.0772	335.81	334.2	9.0772	359.67	357.96
11.2314	26.3106	11.2314	17.95	11.2314	17.9015		8.09126	398	8.09126	402	8.09126	416		9.0939	350.91	348.97	9.0939	335.32	333.71	9.0939	359.16	357.44
11.2513	26.5758	11.2513	17.02	11.2513	18.1288		8.10797	375	8.10797	370	8.10797	391		9.1106	350.36	348.42	9.1106	334.82	333.23	9.1106	358.65	356.93
11.2711	26.8409	11.2711	18.45	11.2711	18.4697		8.12468	413	8.12468	370	8.12468	391		9.1274	349.81	347.88	9.1274	334.33	332.74	9.1274	358.14	356.43
11.2909	26.4924	11.2909	18.43	11.2909	17.7652		8.14139	388	8.14139	359	8.14139	413		9.1441	349.26	347.33	9.1441	333.85	332.26	9.1441	357.64	355.92
11.3108	26.3333	11.3108	18.12	11.3108	18.3939		8.1581	423	8.1581	393	8.1581	379		9.1608	348.71	346.79	9.1608	333.36	331.78	9.1608	357.14	355.41
11.3306	26.6	11.3306	18.49	11.3306	18.4214		8.17481	413	8.17481	370	8.17481	406		9.1775	348.17	346.25	9.1775	332.88	331.3	9.1775	356.64	354.91
11.3505	25.7571	11.3505	18.83	11.3505	17.8929		8.19153	370	8.19153	375	8.19153	377		9.1942	347.63	345.72	9.1942	332.4	330.83	9.1942	356.14	354.41
11.3703	26.1	11.3703	18.46	11.3703	18.3714		8.20824	412	8.20824	358	8.20824	390		9.2109	347.1	345.18	9.2109	331.93	330.36	9.2109	355.65	353.92
11.3901	26.2786	11.3901	19.19	11.3901	18.4714		8.22495	379	8.22495	373	8.22495	404		9.2276	346.56	344.65	9.2276	331.46	329.89	9.2276	355.16	353.42
11.41	26.2071	11.41	18.42	11.41	18.5357		8.24166	389	8.24166	345	8.24166	407		9.2443	346.04	344.12	9.2443	330.99	329.42	9.2443	354.68	352.93
11.4298	26.0429	11.4298	18.72	11.4298	18.8857		8.25837	349	8.25837	379	8.25837	402		9.2611	345.51	343.6	9.2611	330.52	328.96	9.2611	354.19	352.44
11.4497	26.6	11.4497	18.33	11.4497	17.9643		8.27508	428	8.27508	371	8.27508	387		9.2778	344.99	343.08	9.2778	330.06	328.5	9.2778	353.71	351.95
11.4695	27.5429	11.4695	18.49	11.4695	18.5786		8.29179	398	8.29179	378	8.29179	409		9.2945	344.47	342.56	9.2945	329.6	328.04	9.2945	353.23	351.46
11.4893	27.25	11.4893	18.94	11.4893	18.3357		8.3085	382	8.3085	333	8.3085	382		9.3112	343.96	342.04	9.3112	329.15	327.58	9.3112	352.76	350.98
11.5092	27.1786	11.5092	18.97	11.5092	19.4857		8.32522	378	8.32522	363	8.32522	382		9.3279	343.44	341.52	9.3279	328.69	327.13	9.3279	352.29	350.5
11.529	27.6071	11.529	18.9	11.529	18.9286		8.34193	399	8.34193	343	8.34193	387		9.3446	342.93	341.01	9.3446	328.24	326.68	9.3446	351.82	350.02
11.5489	27.4643	11.5489	19.06	11.5489	18.6214		8.35864	364	8.35864	360	8.35864	418		9.3613	342.43	340.5	9.3613	327.8	326.23	9.3613	351.35	349.54
11.5687	27.4429	11.5687	18.99	11.5687	18.6929		8.37535	391	8.37535	359	8.37535	352		9.378	341.93	340	9.378	327.35	325.79	9.378	350.89	349.06
11.5885	27.3286	11.5885	18.46	11.5885	19.5357		8.39206	373	8.39206	395	8.39206	386		9.3947	341.43	339.49	9.3947	326.91	325.34	9.3947	350.43	348.59
11.6084	27.1929	11.6084	19.41	11.6084	18.8286		8.40877	378	8.40877	368	8.40877	392		9.4114	340.93	338.99	9.4114	326.47	324.9	9.4114	349.97	348.11
11.6282	28.2571	11.6282	19.65	11.6282	18.8571		8.42548	363	8.42548	343	8.42548	398		9.4282	340.44	338.49	9.4282	326.04	324.46	9.4282	349.51	347.64
11.648	27.9571	11.648	19.21	11.648	18.3429		8.44219	325	8.44219	370	8.44219	390		9.4449	339.95	337.99	9.4449	325.61	324.02	9.4449	349.06	347.18
11.6679	28.0714	11.6679	19.46	11.6679	19.8786		8.45891	406	8.45891	327	8.45891	366		9.4616	339.46	337.5	9.4616	325.18	323.59	9.4616	348.61	346.71
11.6877	28.0143	11.6877	19.84	11.6877	19.5071		8.47562	327	8.47562	341	8.47562	370		9.4783	338.98	337	9.4783	324.75	323.16	9.4783	348.16	346.24
11.7076	28.8643	11.7076	20.59	11.7076	19.8571		8.49233	366	8.49233	318	8.49233	375		9.495	338.5	336.51	9.495	324.33	322.73	9.495	347.72	345.78
11.7274	29.1429	11.7274	19.89	11.7274	19.8857		8.50904	363	8.50904	356	8.50904	391		9.5117	338	336.02	9.5117	323.89	322.3	9.5117	347.25	345.32
11.7472	28.7214	11.7472	20.16	11.7472	19.5929		8.52575	367	8.52575	348	8.52575	366		9.5284	337.52	335.54	9.5284	323.47	321.87	9.5284	346.81	344.86
11.7671	29.9643	11.7671	20.49	11.7671	20.1071		8.54246	359	8.54246	365	8.54246	366		9.5451	337.05	335.06	9.5451	323.05	321.45	9.5451	346.37	344.4
11.7869	30.3286	11.7869	20.9	11.7869	20.1071		8.55917	332	8.55917	346	8.55917	359		9.5618	336.58	334.57	9.5618	322.64	321.03	9.5618	345.94	343.95
11.8068	30.25	11.8068	20.76	11.8068	20.8357		8.57588	354	8.57588	345	8.57588	368		9.5786	336.12	334.09	9.5786	322.23	320.61	9.5786	345.5	343.49
11.8266	31.7929	11.8266	21.53	11.8266	21.4643		8.5926	399	8.5926	393	8.5926	398		9.5953	335.66	333.62	9.5953	321.82	320.19	9.5953	345.08	343.04
11.8464	32.2857	11.8464	21.94	11.8464	21.3429		8.60931	379	8.60931	352	8.60931	340		9.612	335.2	333.14	9.612	321.42	319.77	9.612	344.65	342.59
11.8663	32.5429	11.8663	21.56	11.8663	21.5286		8.62602	348	8.62602	361	8.62602	397		9.6287	334.74	332.67	9.6287	321.01	319.36	9.6287	344.23	342.14
11.8861	33.8929	11.8861	22.25	11.8861	21.8643		8.64273	372	8.64273	345	8.64273	337		9.6454	334.29	332.2	9.6454	320.62	318.95	9.6454	343.81	341.7
11.906	34.5	11.906	23.01	11.906	22.4429		8.65944	344	8.65944	351	8.65944	390		9.6621	333.84	331.73	9.6621	320.22	318.54	9.6621	343.39	341.25
11.9258	35.8429	11.9258	23.47	11.9258	23.5786		8.67615	362	8.67615	364	8.67615	366		9.6788	333.39	331.26	9.6788	319.83	318.13	9.6788	342.98	340.81
11.9456	37.4	11.9456	24.41	11.9456	24.9357		8.69286	345	8.69286	364	8.69286	374		9.6955	332.95	330.8	9.6955	319.44	317.73	9.6955	342.57	340.37
11.9655	40.0786	11.9655	26.26	11.9655	25.4		8.70957	337	8.70957	371	8.70957	367		9.7123	332.51	330.33	9.7123	319.05	317.32	9.7123	342.16	339.93
11.9853	42.0833	11.9853	26.78	11.9853	27.1667		8.72629	350	8.72629	377	8.72629	367		9.729	332.07	329.87	9.729	318.67	316.92	9.729	341.76	339.49
12.0052	44.8611	12.0052	28.27	12.0052	29.4583		8.743	339	8.743	355	8.743	373		9.7457	331.64	329.41	9.7457	318.29	316.52	9.7457	341.36	339.05
12.025	48.4865	12.025	29.78	12.025	31.2973		8.75971	375	8.75971	362	8.75971	383		9.7624	331.21	328.96	9.7624	317.91	316.12	9.7624	340.97	338.62
12.0448	54.7365	12.0448	32.03	12.0448	34.0473		8.77642	386	8.77642	338	8.77642	386		9.7791	330.78	328.5	9.7791	317.54	315.73	9.7791	340.58	338.19
12.0647	61.0068	12.0647	35.38	12.0647	37.3581		8.79313	383	8.79313	348	8.79313	378		9.7958	330.36	328.05	9.7958	317.16	315.33	9.7958	340.19	337.75
12.0845	67.6216	12.0845	38.32	12.0845	40.4865		8.80984	318	8.80984	320	8.80984	329		9.8125	329.94	327.6	9.8125	316.8	314.94	9.8125	339.8	337.32
12.1044	74.5811	12.1044	42.5	12.1044	44.2297		8.82655	341	8.82655	363	8.82655	347		9.8292	329.53	327.15	9.8292	316.43	314.55	9.8292	339.42	336.89
12.1242	81.6149	12.1242	46.41	12.1242	48.6216		8.84327	348	8.84327	331	8.84327	345		9.8459	329.1	326.7	9.8459	316.05	314.16	9.8459	339.02	336.47
12.144	82.5946	12.144	50.01	12.144	50.9189		8.85998	341	8.85998	323	8.85998	403		9.8627	328.69	326.25	9.8627	315.69	313.78	9.8627	338.65	336.04
12.1639	78.8446	12.1639	52.27	12.1639	49.5743		8.87669	325	8.87669	367	8.87669	332		9.8794	328.28	325.81	9.8794	315.34	313.39	9.8794	338.28	335.62
12.1837	70.9865	12.1837	50.61	12.1837	46.9392		8.8934	331	8.8934	329	8.8934	330		9.8961	327.89	325.37	9.8961	314.99	313.01	9.8961	337.92	335.2
12.2035	62.6824	12.2035	46.23	12.2035	41.6689		8.91011	332	8.91011	322	8.91011	349		9.9128	327.49	324.93	9.9128	314.64	312.63	9.9128	337.56	334.78
12.2234	52.9054	12.2234	41.18	12.2234	36.7973		8.92682	358	8.92682	375	8.92682	363		9.9295	327.1	324.49	9.9295	314.3	312.25	9.9295	337.2	334.36
12.2432	47.0473	12.2432	35.87	12.2432	32.6081		8.94353	332	8.94353	315	8.94353	363		9.9462	326.72	324.05	9.9462	313.96	311.87	9.9462	336.86	333.94
12.2631	45.9324	12.2631	32.44	12.2631	31.6419		8.96024	345	8.96024	319	8.96024	352		9.9629	326.34	323.62	9.9629	313.63	311.49	9.9629	336.51	333.52
12.2829	43.5811	12.2829	31.29	12.2829	30.6216		8.97696	349	8.97696	375	8.97696	358		9.9796	325.96	323.18	9.9796	313.3	311.12	9.9796	336.18	333.11
12.3027	44.8649	12.3027	30.29	12.3027	30.5676		8.99367	344	8.99367	346	8.99367	367		9.9963	325.6	322.75	9.9963	312.97	310.74	9.9963	335.85	332.69
12.3226	44.1892	12.3226	30.26	12.3226	29.9797		9.01038	358	9.01038	345	9.01038	313		10.0131	325.23	322.32	10.0131	312.65	310.37	10.0131	335.53	332.28
12.3424	43.4662	12.3424	29.67	12.3424	30.1419		9.02709	370	9.02709	321	9.02709	376		10.0298	324.88	321.89	10.0298	312.34	310	10.0298	335.21	331.87
12.3623	43.4122	12.3623	29.78	12.3623	31.0541		9.0438	313	9.0438	322	9.0438	366		10.0465	324.53	321.46	10.0465	312.03	309.63	10.0465	334.91	331.46
12.3821	41.5541	12.3821	29.68	12.3821	30.6014		9.06051	341	9.06051	314	9.06051	348		10.0632	324.19	321.04	10.0632	311.73	309.27	10.0632	334.61	331.06
12.4019	41.8311	12.4019	29.14	12.4019	28.473		9.07722	346	9.07722	343	9.07722	380		10.0799	323.85	320.61	10.0799	311.43	308.9	10.0799	334.32	330.65
12.4218	39.5743	12.4218	28.3	12.4218	28.9797		9.09393	349	9.09393	308	9.09393	306		10.0966	323.53	320.19	10.0966	311.14	308.54	10.0966	334.04	330.25
12.4416	40.4189	12.4416	29.02	12.4416	27.4324		9.11065	372	9.11065	313	9.11065	346		10.1133	323.21	319.77	10.1133	310.86	308.17	10.1133	333.77	329.84
12.4615	38.6486	12.4615	27.57	12.4615	26.6014		9.12736	361	9.12736	304	9.12736	359		10.13	322.9	319.35	10.13	310.59	307.81	10.13	333.51	329.44
12.4813	37.527	12.4813	26.64	12.4813	26.1892		9.14407	333	9.14407	339	9.14407	361		10.1467	322.61	318.93	10.1467	310.33	307.45	10.1467	333.26	329.04
12.5011	35.3378	12.5011	25.87	12.5011	24.8243		9.16078	335	9.16078	323	9.16078	331		10.1635	322.32	318.52	10.1635	310.07	307.1	10.1635	333.03	328.64
12.521	33.1824	12.521	25.11	12.521	24.223		9.17749	356	9.17749	337	9.17749	333		10.1802	322.05	318.1	10.1802	309.83	306.74	10.1802	332.82	328.24
12.5408	32.3514	12.5408	24.19	12.5408	22.6284		9.1942	315	9.1942	325	9.1942	352		10.1969	321.7	317.69	10.1969	309.51	306.38	10.1969	332.51	327.85
12.5607	32.2905	12.5607	22.56	12.5607	21.3986		9.21091	306	9.21091	343	9.21091	328		10.2136	321.45	317.28	10.2136	309.29	306.03	10.2136	332.32	327.45
12.5805	30.5068	12.5805	22.06	12.5805	21.9189		9.22762	301	9.22762	313	9.22762	348		10.2303	321.21	316.87	10.2303	309.07	305.68	10.2303	332.15	327.06
12.6003	30.223	12.6003	21.18	12.6003	21.2703		9.24434	338	9.24434	334	9.24434	364		10.247	321	316.46	10.247	308.88	305.33	10.247	331.99	326.67
12.6202	29.8882	12.6202	20.12	12.6202	20.2632		9.26105	341	9.26105	312	9.26105	343		10.2637	320.8	316.05	10.2637	308.69	304.98	10.2637	331.86	326.28
12.64	29.6053	12.64	20.2	12.64	20.4474		9.27776	319	9.27776	296	9.27776	347		10.2804	320.62	315.65	10.2804	308.53	304.63	10.2804	331.76	325.89
12.6599	27.9539	12.6599	19.76	12.6599	19.6842		9.29447	333	9.29447	325	9.29447	350		10.2972	320.47	315.24	10.2972	308.38	304.29	10.2972	331.68	325.5
12.6797	29.0461	12.6797	19.91	12.6797	20.2961		9.31118	296	9.31118	285	9.31118	366		10.3139	320.34	314.84	10.3139	308.26	303.94	10.3139	331.62	325.11
12.6995	28.75	12.6995	19.12	12.6995	19.1908		9.32789	351	9.32789	320	9.32789	338		10.3306	320.24	314.44	10.3306	308.16	303.6	10.3306	331.61	324.72
12.7194	28.8782	12.7194	19.34	12.7194	19.7244		9.3446	314	9.3446	313	9.3446	358		10.3473	320.18	314.04	10.3473	308.09	303.25	10.3473	331.62	324.34
12.7392	28.5	12.7392	19.97	12.7392	19.5		9.36131	372	9.36131	350	9.36131	352		10.364	320.15	313.64	10.364	308.05	302.91	10.364	331.68	323.96
12.759	28.4295	12.759	19.54	12.759	19.7821		9.37803	331	9.37803	310	9.37803	335		10.3807	320.16	313.24	10.3807	308.05	302.57	10.3807	331.78	323.58
12.7789	29.2885	12.7789	19.51	12.7789	20.2628		9.39474	372	9.39474	339	9.39474	355		10.3974	320.22	312.85	10.3974	308.08	302.24	10.3974	331.93	323.2
12.7987	28.5513	12.7987	19.46	12.7987	19.2756		9.41145	358	9.41145	337	9.41145	342		10.4141	320.33	312.45	10.4141	308.16	301.9	10.4141	332.13	322.82
12.8186	27.6346	12.8186	19.62	12.8186	19.2115		9.42816	315	9.42816	317	9.42816	336		10.4308	320.49	312.06	10.4308	308.28	301.56	10.4308	332.38	322.44
12.8384	28.1603	12.8384	19.38	12.8384	18.8718		9.44487	320	9.44487	302	9.44487	325		10.4476	320.71	311.67	10.4476	308.46	301.23	10.4476	332.7	322.06
12.8582	28.1603	12.8582	18.85	12.8582	19.1667		9.46158	312	9.46158	342	9.46158	343		10.4643	321	311.28	10.4643	308.69	300.9	10.4643	333.09	321.69
12.8781	27.7564	12.8781	19.06	12.8781	19.2436		9.47829	342	9.47829	329	9.47829	333		10.481	321.37	310.89	10.481	309	300.56	10.481	333.56	321.31
12.8979	28.0513	12.8979	19.2	12.8979	19.5897		9.495	338	9.495	355	9.495	322		10.4977	321.82	310.5	10.4977	309.37	300.23	10.4977	334.1	320.94
12.9178	28.3269	12.9178	19.29	12.9178	19.4872		9.51172	296	9.51172	292	9.51172	344		10.5144	322.35	310.11	10.5144	309.81	299.9	10.5144	334.74	320.57
12.9376	28.2564	12.9376	18.67	12.9376	18.8397		9.52843	333	9.52843	308	9.52843	334		10.5311	322.98	309.73	10.5311	310.35	299.58	10.5311	335.48	320.2
12.9574	27.8205	12.9574	19.28	12.9574	19.4487		9.54514	333	9.54514	333	9.54514	377		10.5478	323.37	309.34	10.5478	310.65	299.25	10.5478	336.02	319.83
12.9773	27.5256	12.9773	18.97	12.9773	18.9744		9.56185	302	9.56185	325	9.56185	333		10.5645	324.22	308.96	10.5645	311.37	298.92	10.5645	336.98	319.46
12.9971	27.4872	12.9971	19.21	12.9971	19.2051		9.57856	356	9.57856	307	9.57856	338		10.5812	325.2	308.58	10.5812	312.2	298.6	10.5812	338.07	319.09
13.017	28.0128	13.017	19.35	13.017	19.5449		9.59527	320	9.59527	339	9.59527	351		10.598	326.32	308.2	10.598	313.16	298.28	10.598	339.31	318.73
13.0368	27.6987	13.0368	19.67	13.0368	18.9551		9.61198	310	9.61198	290	9.61198	332		10.6147	327.61	307.82	10.6147	314.25	297.95	10.6147	340.71	318.36
13.0566	27.891	13.0566	19.29	13.0566	19.0064		9.62869	329	9.62869	330	9.62869	354		10.6314	329.07	307.44	10.6314	315.5	297.63	10.6314	342.29	318
13.0765	27.5577	13.0765	19.32	13.0765	18.8141		9.64541	330	9.64541	310	9.64541	338		10.6481	330.74	307.06	10.6481	316.94	297.31	10.6481	344.07	317.64
13.0963	28.1346	13.0963	18.74	13.0963	18.7372		9.66212	349	9.66212	291	9.66212	355		10.6648	332.66	306.69	10.6648	318.58	297	10.6648	346.08	317.28
13.1162	28.0064	13.1162	18.65	13.1162	18.9808		9.67883	306	9.67883	340	9.67883	339		10.6815	334.85	306.31	10.6815	320.48	296.68	10.6815	348.34	316.92
13.136	27.8333	13.136	18.5	13.136	19.5385		9.69554	335	9.69554	324	9.69554	310		10.6982	337.36	305.94	10.6982	322.66	296.36	10.6982	350.88	316.56
13.1558	27.859	13.1558	19.08	13.1558	19.3846		9.71225	295	9.71225	297	9.71225	337		10.7149	340.23	305.57	10.7149	325.17	296.05	10.7149	353.71	316.2
13.1757	28.2244	13.1757	18.94	13.1757	19.0128		9.72896	302	9.72896	297	9.72896	331		10.7316	343.5	305.2	10.7316	328.04	295.73	10.7316	356.88	315.85
13.1955	28.3462	13.1955	18.5	13.1955	18.7949		9.74567	352	9.74567	340	9.74567	328		10.7483	347.21	304.83	10.7483	331.33	295.42	10.7483	360.4	315.49
13.2154	28.1603	13.2154	19.26	13.2154	19.0833		9.76238	283	9.76238	296	9.76238	312		10.7651	351.43	304.46	10.7651	335.08	295.11	10.7651	364.3	315.14
13.2352	27.3269	13.2352	19.12	13.2352	19.2949		9.7791	305	9.7791	315	9.7791	316		10.7818	356.2	304.09	10.7818	339.35	294.8	10.7818	368.6	314.79
13.255	27.141	13.255	19.38	13.255	19.1282		9.79581	363	9.79581	308	9.79581	322		10.7985	361.61	303.73	10.7985	344.22	294.49	10.7985	373.31	314.44
13.2749	28.1188	13.2749	19.2	13.2749	19.4438		9.81252	309	9.81252	289	9.81252	328		10.8152	367.71	303.36	10.8152	349.78	294.18	10.8152	378.42	314.09
13.2947	27.7063	13.2947	18.77	13.2947	19.4375		9.82923	301	9.82923	283	9.82923	360		10.8319	374.6	303	10.8319	356.13	293.87	10.8319	383.89	313.74
13.3145	27.3938	13.3145	18.49	13.3145	19.225		9.84594	340	9.84594	284	9.84594	335		10.8486	382.3	302.64	10.8486	363.33	293.57	10.8486	389.64	313.39
13.3344	28.1063	13.3344	19.11	13.3344	18.7438		9.86265	327	9.86265	306	9.86265	323		10.8653	390.83	302.27	10.8653	371.46	293.26	10.8653	395.52	313.05
13.3542	27.9813	13.3542	18.54	13.3542	19.4		9.87936	301	9.87936	303	9.87936	339		10.882	400.12	301.91	10.882	380.52	292.96	10.882	401.29	312.7
13.3741	27.0438	13.3741	19.18	13.3741	19.225		9.89608	289	9.89608	325	9.89608	329		10.8988	409.9	301.55	10.8988	390.38	292.66	10.8988	406.62	312.36
13.3939	27.5244	13.3939	19.26	13.3939	19.7317		9.91279	290	9.91279	322	9.91279	320		10.9155	420.08	301.2	10.9155	401.01	292.35	10.9155	411.45	312.01
13.4137	26.9207	13.4137	18.46	13.4137	18.9634		9.9295	340	9.9295	285	9.9295	354		10.9322	428.88	300.84	10.9322	410.81	292.05	10.9322	414.53	311.67
13.4336	27.7561	13.4336	19.23	13.4336	19.9756		9.94621	329	9.94621	296	9.94621	292		10.9489	435.12	300.48	10.9489	418.4	291.75	10.9489	415.67	311.33
13.4534	27.5122	13.4534	18.91	13.4534	19.7134		9.96292	323	9.96292	297	9.96292	366		10.9656	437.07	300.13	10.9656	421.64	291.45	10.9656	414.48	310.99
13.4733	27.9451	13.4733	18.59	13.4733	18.9756		9.97963	334	9.97963	310	9.97963	333		10.9823	433.42	299.77	10.9823	418.7	291.16	10.9823	410.85	310.65
13.4931	27.4939	13.4931	18.96	13.4931	19.25		9.99634	322	9.99634	327	9.99634	325		10.999	424.07	299.42	10.999	409.17	290.86	10.999	404.97	310.32
13.5129	28.2927	13.5129	18.43	13.5129	19.1341		10.013	304	10.013	280	10.013	331		11.0157	410.36	299.07	11.0157	394.63	290.56	11.0157	397.34	309.98
13.5328	28.2805	13.5328	18.8	13.5328	19.4695		10.0298	293	10.0298	269	10.0298	330		11.0324	394.55	298.72	11.0324	377.89	290.27	11.0324	388.63	309.65
13.5526	27.878	13.5526	18.71	13.5526	18.7439		10.0465	316	10.0465	294	10.0465	337		11.0492	378.91	298.37	11.0492	361.69	289.98	11.0492	379.6	309.31
13.5725	27.1159	13.5725	18.57	13.5725	19.1159		10.0632	294	10.0632	295	10.0632	314		11.0659	364.91	298.02	11.0659	347.71	289.68	11.0659	370.87	308.98
13.5923	28.2012	13.5923	19.01	13.5923	19.2012		10.0799	316	10.0799	313	10.0799	336		11.0826	353.18	297.67	11.0826	336.43	289.39	11.0826	362.83	308.65
13.6121	28.0976	13.6121	18.63	13.6121	19.2988		10.0966	328	10.0966	298	10.0966	311		11.0993	343.7	297.33	11.0993	327.66	289.1	11.0993	355.7	308.32
13.632	28.0183	13.632	18.27	13.632	19.8171		10.1133	320	10.1133	282	10.1133	335		11.116	336.17	296.98	11.116	320.9	288.81	11.116	349.5	307.99
13.6518	26.7744	13.6518	19.04	13.6518	19.5854		10.13	317	10.13	264	10.13	324		11.1327	330.2	296.64	11.1327	315.69	288.52	11.1327	344.21	307.66
13.6717	27.4817	13.6717	19.48	13.6717	20.3476		10.1467	315	10.1467	294	10.1467	311		11.1494	325.47	296.3	11.1494	311.65	288.23	11.1494	339.73	307.33
13.6915	27.3415	13.6915	18.95	13.6915	20.8902		10.1635	303	10.1635	261	10.1635	355		11.1661	321.7	295.95	11.1661	308.48	287.95	11.1661	335.93	307.01
13.7113	28.6159	13.7113	19.31	13.7113	20.7927		10.1802	322	10.1802	311	10.1802	307		11.1828	318.66	295.61	11.1828	305.97	287.66	11.1828	332.71	306.68
13.7312	27.5	13.7312	19.41	13.7312	20.5		10.1969	315	10.1969	288	10.1969	332		11.1996	316.19	295.27	11.1996	303.94	287.38	11.1996	329.99	306.36
13.751	27.122	13.751	19.21	13.751	19.9756		10.2136	313	10.2136	356	10.2136	329		11.2163	314.18	294.93	11.2163	302.29	287.09	11.2163	327.73	306.04
13.7709	28.0366	13.7709	19.41	13.7709	19.5671		10.2303	319	10.2303	316	10.2303	348		11.233	312.57	294.6	11.233	301.01	286.81	11.233	325.86	305.72
13.7907	27.3232	13.7907	19.07	13.7907	19.3354		10.247	321	10.247	293	10.247	337		11.2497	311.33	294.26	11.2497	300.04	286.53	11.2497	324.28	305.4
13.8105	27.25	13.8105	18.2	13.8105	19.0915		10.2637	337	10.2637	316	10.2637	306		11.2664	310.37	293.92	11.2664	299.28	286.25	11.2664	323.05	305.08
13.8304	28.122	13.8304	19.16	13.8304	19.7439		10.2804	305	10.2804	294	10.2804	331		11.2831	309.7	293.59	11.2831	298.79	285.97	11.2831	322.13	304.76
13.8502	27.9268	13.8502	18.84	13.8502	19.3902		10.2972	310	10.2972	285	10.2972	295		11.2998	309.35	293.26	11.2998	298.58	285.69	11.2998	321.48	304.44
13.87	27.25	13.87	18.77	13.87	19.2683		10.3139	329	10.3139	295	10.3139	359		11.3165	309.29	292.92	11.3165	298.6	285.41	11.3165	321.24	304.13
13.8899	27.8963	13.8899	18.04	13.8899	19.2927		10.3306	327	10.3306	341	10.3306	322		11.3332	309.68	292.59	11.3332	299.08	285.13	11.3332	321.57	303.81
13.9097	27.3869	13.9097	19.23	13.9097	19.7143		10.3473	306	10.3473	311	10.3473	344		11.35	310.6	292.26	11.35	300.08	284.86	11.35	323	303.5
13.9296	27.6845	13.9296	18.76	13.9296	19.4583		10.364	330	10.364	294	10.364	308		11.3667	312.48	291.93	11.3667	302.23	284.58	11.3667	325.32	303.19
13.9494	27.8393	13.9494	18.74	13.9494	19.9048		10.3807	306	10.3807	300	10.3807	356		11.3834	315.47	291.6	11.3834	305.69	284.31	11.3834	326.48	302.87
13.9692	27.7976	13.9692	19.63	13.9692	20.1607		10.3974	313	10.3974	328	10.3974	305		11.4001	317.97	291.27	11.4001	308.06	284.03	11.4001	323.49	302.56
13.9891	27.5893	13.9891	19.29	13.9891	18.7321		10.4141	322	10.4141	310	10.4141	319		11.4168	317.37	290.95	11.4168	306.21	283.76	11.4168	318.14	302.26
14.0089	27.7857	14.0089	18.71	14.0089	19.9464		10.4308	331	10.4308	288	10.4308	300		11.4335	312.44	290.62	11.4335	300.3	283.49	11.4335	312.87	301.95
14.0288	27.9821	14.0288	19.34	14.0288	19.6845		10.4475	316	10.4475	296	10.4475	340		11.4502	305.77	290.3	11.4502	293.66	283.22	11.4502	310.03	301.64
14.0486	27.3214	14.0486	19.82	14.0486	18.5		10.4643	291	10.4643	292	10.4643	339		11.4669	300.55	289.97	11.4669	289.76	282.95	11.4669	308.69	301.34
14.0684	27.5536	14.0684	18.68	14.0684	18.8571		10.481	333	10.481	289	10.481	343		11.4837	297.57	289.65	11.4837	287.88	282.68	11.4837	307.93	301.03
14.0883	27.3779	14.0883	18.85	14.0883	19.157		10.4977	315	10.4977	294	10.4977	367		11.5004	296.09	289.33	11.5004	287.08	282.41	11.5004	307.3	300.73
14.1081	28.186	14.1081	18.56	14.1081	19.3081		10.5144	310	10.5144	303	10.5144	334		11.5171	295.19	289.01	11.5171	286.53	282.15	11.5171	306.72	300.42
14.128	27.0058	14.128	18.98	14.128	19.2965		10.5311	314	10.5311	309	10.5311	287		11.5338	294.5	288.69	11.5338	286.06	281.88	11.5338	306.17	300.12
14.1478	27.4244	14.1478	18.41	14.1478	19.2616		10.5478	335	10.5478	288	10.5478	312		11.5505	293.92	288.37	11.5505	285.63	281.61	11.5505	305.66	299.82
14.1676	27.4302	14.1676	18.38	14.1676	19.1337		10.5645	345	10.5645	295	10.5645	330		11.5672	293.39	288.05	11.5672	285.23	281.35	11.5672	305.17	299.52
14.1875	27.0116	14.1875	18.33	14.1875	19.4012		10.5812	302	10.5812	363	10.5812	336		11.5839	292.9	287.73	11.5839	284.86	281.09	11.5839	304.7	299.23
14.2073	27.3081	14.2073	18.42	14.2073	18.4302		10.598	341	10.598	338	10.598	325		11.6006	292.44	287.42	11.6006	284.49	280.82	11.6006	304.25	298.93
14.2272	27.0349	14.2272	18.84	14.2272	18.8779		10.6147	314	10.6147	316	10.6147	324		11.6173	292	287.1	11.6173	284.15	280.56	11.6173	303.81	298.63
14.247	27.0698	14.247	18.88	14.247	18.843		10.6314	348	10.6314	302	10.6314	364		11.6341	291.59	286.79	11.6341	283.82	280.3	11.6341	303.39	298.34
14.2668	27.2442	14.2668	18.96	14.2668	19.7733		10.6481	304	10.6481	318	10.6481	339		11.6508	291.19	286.48	11.6508	283.49	280.04	11.6508	302.99	298.05
14.2867	27.6163	14.2867	19.18	14.2867	19.3953		10.6648	328	10.6648	317	10.6648	358		11.6675	290.81	286.16	11.6675	283.18	279.78	11.6675	302.6	297.75
14.3065	27.3023	14.3065	18.23	14.3065	19.1221		10.6815	344	10.6815	281	10.6815	324		11.6842	290.41	285.85	11.6842	282.86	279.52	11.6842	302.2	297.46
14.3264	27.4012	14.3264	18.51	14.3264	18.9709		10.6982	324	10.6982	315	10.6982	332		11.7009	290.06	285.54	11.7009	282.57	279.26	11.7009	301.84	297.17
14.3462	27.314	14.3462	18.34	14.3462	19.4477		10.7149	348	10.7149	320	10.7149	323		11.7176	289.73	285.23	11.7176	282.29	279.01	11.7176	301.49	296.88
14.366	27.0116	14.366	18.63	14.366	19.6628		10.7316	306	10.7316	322	10.7316	344		11.7343	289.41	284.93	11.7343	282.03	278.75	11.7343	301.15	296.59
14.3859	26.0698	14.3859	17.76	14.3859	19		10.7484	329	10.7484	340	10.7484	339		11.751	289.11	284.62	11.751	281.77	278.5	11.751	300.83	296.31
14.4057	27.2965	14.4057	18.57	14.4057	19.5581		10.7651	325	10.7651	342	10.7651	365		11.7677	288.84	284.31	11.7677	281.54	278.24	11.7677	300.53	296.02
14.4255	27.3779	14.4255	18.62	14.4255	19.1105		10.7818	342	10.7818	337	10.7818	371		11.7845	288.58	284.01	11.7845	281.32	277.99	11.7845	300.24	295.74
14.4454	26.843	14.4454	19.23	14.4454	18.7442		10.7985	371	10.7985	332	10.7985	342		11.8012	288.34	283.7	11.8012	281.11	277.74	11.8012	299.96	295.45
14.4652	27.1163	14.4652	18.72	14.4652	19.1977		10.8152	371	10.8152	343	10.8152	361		11.8179	288.12	283.4	11.8179	280.92	277.49	11.8179	299.71	295.17
14.4851	26.7326	14.4851	18.6	14.4851	19.0407		10.8319	360	10.8319	312	10.8319	377		11.8346	287.92	283.1	11.8346	280.75	277.23	11.8346	299.46	294.89
14.5049	27.3953	14.5049	19.06	14.5049	19.3547		10.8486	382	10.8486	377	10.8486	392		11.8513	287.73	282.79	11.8513	280.59	276.98	11.8513	299.23	294.61
14.5247	27.1686	14.5247	18.7	14.5247	18.6512		10.8653	372	10.8653	343	10.8653	391		11.868	287.56	282.49	11.868	280.44	276.74	11.868	299.01	294.33
14.5446	26.3837	14.5446	18.73	14.5446	19.3837		10.882	405	10.882	380	10.882	374		11.8847	287.41	282.19	11.8847	280.3	276.49	11.8847	298.79	294.05
14.5644	27.3352	14.5644	19.27	14.5644	19.5		10.8987	419	10.8987	383	10.8987	378		11.9014	287.28	281.9	11.9014	280.17	276.24	11.9014	298.58	293.77
14.5843	26.7841	14.5843	18.55	14.5843	18.7841		10.9155	410	10.9155	382	10.9155	405		11.9181	287.18	281.6	11.9181	280.06	275.99	11.9181	298.41	293.5
14.6041	26.1477	14.6041	18.65	14.6041	18.5057		10.9322	420	10.9322	414	10.9322	395		11.9348	287.13	281.3	11.9348	279.99	275.75	11.9348	298.28	293.22
14.6239	27.108	14.6239	18.16	14.6239	18.5398		10.9489	437	10.9489	422	10.9489	386		11.9516	287.16	281.01	11.9516	279.97	275.5	11.9516	298.21	292.95
14.6438	26.858	14.6438	18.51	14.6438	18.9545		10.9656	431	10.9656	439	10.9656	391		11.9683	287.26	280.71	11.9683	280.02	275.26	11.9683	298.18	292.68
14.6636	26.6648	14.6636	18.62	14.6636	19.1534		10.9823	439	10.9823	415	10.9823	419		11.985	287.41	280.42	11.985	280.13	275.02	11.985	298.18	292.4
14.6835	27.3125	14.6835	18.15	14.6835	19.1477		10.999	452	10.999	415	10.999	417		12.0017	287.61	280.12	12.0017	280.27	274.77	12.0017	298.19	292.13
14.7033	26.1648	14.7033	18.2	14.7033	18.7159		11.0157	419	11.0157	424	11.0157	430		12.0184	287.87	279.83	12.0184	280.44	274.53	12.0184	298.28	291.86
14.7231	26.4545	14.7231	18.33	14.7231	19.2102		11.0324	410	11.0324	404	11.0324	437		12.0351	288.28	279.54	12.0351	280.69	274.29	12.0351	298.48	291.6
14.743	27.3352	14.743	18.11	14.743	18.5909		11.0491	392	11.0491	403	11.0491	379		12.0518	288.84	279.25	12.0518	281.09	274.05	12.0518	298.76	291.33
14.7628	27.2111	14.7628	18.44	14.7628	18.9611		11.0659	401	11.0659	340	11.0659	341		12.0685	289.53	278.96	12.0685	281.6	273.81	12.0685	299.11	291.06
14.7827	27.4722	14.7827	18.29	14.7827	18.2389		11.0826	385	11.0826	357	11.0826	332		12.0853	290.32	278.67	12.0853	282.11	273.57	12.0853	299.61	290.8
14.8025	26.5167	14.8025	18.39	14.8025	18.4722		11.0993	358	11.0993	336	11.0993	382		12.102	291.54	278.39	12.102	283.02	273.34	12.102	300.32	290.53
14.8223	26.9833	14.8223	18.04	14.8223	17.9389		11.116	329	11.116	342	11.116	335		12.1187	293.12	278.1	12.1187	284.12	273.1	12.1187	301.4	290.27
14.8422	27.4111	14.8422	18.18	14.8422	18.4444		11.1327	349	11.1327	293	11.1327	361		12.1354	295.35	277.82	12.1354	285.7	272.86	12.1354	302.91	290.01
14.862	26.9	14.862	17.85	14.862	18.8667		11.1494	338	11.1494	307	11.1494	300		12.1521	298.5	277.53	12.1521	287.88	272.63	12.1521	305.48	289.75
14.8819	27.0167	14.8819	18.21	14.8819	19.3111		11.1661	316	11.1661	301	11.1661	354		12.1688	303.36	277.25	12.1688	291.39	272.39	12.1688	310.03	289.49
14.9017	26.9444	14.9017	18.62	14.9017	18.95		11.1828	306	11.1828	335	11.1828	314		12.1855	309.46	276.96	12.1855	297.23	272.16	12.1855	314.75	289.23
14.9215	26.8889	14.9215	18.07	14.9215	18.8778		11.1996	280	11.1996	276	11.1996	345		12.2022	313.32	276.68	12.2022	303.15	271.93	12.2022	316.28	288.97
14.9414	27.2833	14.9414	17.96	14.9414	18.9833		11.2163	306	11.2163	294	11.2163	321		12.2189	310.78	276.4	12.2189	304.89	271.7	12.2189	310.82	288.71
14.9612	26.5833	14.9612	17.86	14.9612	18.9222		11.233	297	11.233	316	11.233	346		12.2357	302.27	276.12	12.2357	298.28	271.47	12.2357	302.86	288.46
14.981	26.7444	14.981	18.35	14.981	18.6444		11.2497	317	11.2497	305	11.2497	333		12.2524	292.48	275.84	12.2524	288.34	271.24	12.2524	296.39	288.2
15.0009	26.4444	15.0009	18.28	15.0009	18.3111		11.2664	293	11.2664	273	11.2664	309		12.2691	285.85	275.57	12.2691	280.18	271.01	12.2691	293.2	287.95
15.0207	27.0667	15.0207	18.28	15.0207	19.2056		11.2831	318	11.2831	307	11.2831	298		12.2858	282.4	275.29	12.2858	276.02	270.78	12.2858	292.16	287.7
15.0406	26.1278	15.0406	18.29	15.0406	18.9556		11.2998	295	11.2998	305	11.2998	323		12.3025	280.93	275.01	12.3025	274.54	270.55	12.3025	291.74	287.45
15.0604	25.9556	15.0604	18.56	15.0604	18.75		11.3165	305	11.3165	289	11.3165	344		12.3192	280.15	274.74	12.3192	273.96	270.32	12.3192	291.43	287.2
15.0802	26.5389	15.0802	18.02	15.0802	18.5611		11.3332	254	11.3332	293	11.3332	324		12.3359	279.63	274.46	12.3359	273.59	270.1	12.3359	291.17	286.95
15.1001	26.8944	15.1001	18.37	15.1001	18.8611		11.35	306	11.35	290	11.35	328		12.3526	279.22	274.19	12.3526	273.3	269.87	12.3526	290.93	286.7
15.1199	26.8889	15.1199	18.13	15.1199	18.7944		11.3667	295	11.3667	289	11.3667	302		12.3693	278.88	273.92	12.3693	273.05	269.65	12.3693	290.7	286.45
15.1398	25.7278	15.1398	17.87	15.1398	18.5		11.3834	341	11.3834	309	11.3834	319		12.386	278.58	273.65	12.386	272.82	269.43	12.386	290.48	286.21
15.1596	26.7611	15.1596	18.77	15.1596	18.7444		11.4001	320	11.4001	288	11.4001	337		12.4028	278.3	273.38	12.4028	272.61	269.2	12.4028	290.27	285.96
15.1794	26.3611	15.1794	18.69	15.1794	18.9556		11.4168	327	11.4168	291	11.4168	290		12.4195	278.05	273.11	12.4195	272.4	268.98	12.4195	290.07	285.72
15.1993	26.0333	15.1993	17.91	15.1993	19		11.4335	289	11.4335	301	11.4335	295		12.4362	277.8	272.84	12.4362	272.21	268.76	12.4362	289.87	285.48
15.2191	26.8315	15.2191	18.08	15.2191	18.712		11.4502	327	11.4502	266	11.4502	330		12.4529	277.57	272.57	12.4529	272.02	268.54	12.4529	289.68	285.24
15.239	26.6196	15.239	18.42	15.239	18.7391		11.4669	266	11.4669	295	11.4669	298		12.4696	277.35	272.31	12.4696	271.84	268.32	12.4696	289.49	285
15.2588	26.3859	15.2588	17.85	15.2588	18.6196		11.4837	286	11.4837	298	11.4837	313		12.4863	277.14	272.04	12.4863	271.66	268.1	12.4863	289.31	284.76
15.2786	26.7663	15.2786	17.89	15.2786	18.1087		11.5004	280	11.5004	279	11.5004	312		12.503	276.92	271.78	12.503	271.47	267.88	12.503	289.12	284.52
15.2985	26.2663	15.2985	18.26	15.2985	18.9565		11.5171	307	11.5171	286	11.5171	320		12.5197	276.72	271.51	12.5197	271.3	267.66	12.5197	288.95	284.28
15.3183	26.6793	15.3183	18.52	15.3183	18.2663		11.5338	297	11.5338	271	11.5338	315		12.5365	276.53	271.25	12.5365	271.14	267.45	12.5365	288.78	284.05
15.3382	26.6793	15.3382	18.32	15.3382	18.587		11.5505	278	11.5505	305	11.5505	319		12.5532	276.35	270.99	12.5532	270.97	267.23	12.5532	288.61	283.81
15.358	26.875	15.358	18.46	15.358	18.3152		11.5672	304	11.5672	269	11.5672	321		12.5699	276.17	270.73	12.5699	270.82	267.02	12.5699	288.45	283.58
15.3778	26.5598	15.3778	17.71	15.3778	18.7065		11.5839	290	11.5839	292	11.5839	327		12.5866	276	270.47	12.5866	270.66	266.8	12.5866	288.3	283.35
15.3977	26.1957	15.3977	18.38	15.3977	18.788		11.6006	301	11.6006	276	11.6006	307		12.6033	275.83	270.21	12.6033	270.51	266.59	12.6033	288.15	283.11
15.4175	25.837	15.4175	18.05	15.4175	18.5217		11.6173	305	11.6173	294	11.6173	309		12.62	275.67	269.95	12.62	270.37	266.38	12.62	288	282.88
15.4374	26.0489	15.4374	18.06	15.4374	18.625		11.6341	271	11.6341	287	11.6341	328		12.6367	275.51	269.69	12.6367	270.23	266.17	12.6367	287.86	282.65
15.4572	27.2287	15.4572	17.53	15.4572	18.3883		11.6508	297	11.6508	262	11.6508	305		12.6534	275.37	269.44	12.6534	270.09	265.96	12.6534	287.72	282.43
15.477	25.9415	15.477	18.25	15.477	19.1809		11.6675	303	11.6675	289	11.6675	293		12.6702	275.22	269.18	12.6702	269.96	265.75	12.6702	287.59	282.2
15.4969	26.0691	15.4969	17.78	15.4969	18.3404		11.6842	257	11.6842	283	11.6842	277		12.6869	275.09	268.93	12.6869	269.83	265.54	12.6869	287.47	281.97
15.5167	26.9149	15.5167	18.46	15.5167	18.8777		11.7009	293	11.7009	263	11.7009	333		12.7036	274.96	268.68	12.7036	269.7	265.33	12.7036	287.35	281.75
15.5365	25.8936	15.5365	17.84	15.5365	18.4787		11.7176	295	11.7176	284	11.7176	311		12.7203	274.84	268.42	12.7203	269.58	265.12	12.7203	287.24	281.52
15.5564	26.1489	15.5564	18.6	15.5564	18.3404		11.7343	281	11.7343	312	11.7343	298		12.737	274.72	268.17	12.737	269.47	264.91	12.737	287.13	281.3
15.5762	26.1968	15.5762	17.33	15.5762	17.9362		11.751	292	11.751	258	11.751	297		12.7537	274.61	267.92	12.7537	269.36	264.71	12.7537	287.04	281.08
15.5961	25.8351	15.5961	17.76	15.5961	18.633		11.7677	293	11.7677	315	11.7677	308		12.7704	274.51	267.67	12.7704	269.26	264.5	12.7704	286.94	280.86
15.6159	26.8989	15.6159	17.64	15.6159	18.8404		11.7844	289	11.7844	302	11.7844	280		12.7871	274.42	267.42	12.7871	269.16	264.3	12.7871	286.86	280.64
15.6357	26.3298	15.6357	18.07	15.6357	18.7128		11.8012	277	11.8012	281	11.8012	320		12.8038	274.34	267.18	12.8038	269.07	264.09	12.8038	286.78	280.42
15.6556	26.1277	15.6556	17.66	15.6556	18.2128		11.8179	317	11.8179	284	11.8179	312		12.8205	274.27	266.93	12.8205	268.98	263.89	12.8205	286.71	280.2
15.6754	25.8191	15.6754	17.42	15.6754	18.5638		11.8346	256	11.8346	302	11.8346	304		12.8373	274.2	266.68	12.8373	268.9	263.69	12.8373	286.65	279.98
15.6953	26.4947	15.6953	18.44	15.6953	19.0266		11.8513	304	11.8513	290	11.8513	301		12.854	274.15	266.44	12.854	268.83	263.49	12.854	286.6	279.77
15.7151	26.3298	15.7151	18.04	15.7151	18.8298		11.868	309	11.868	308	11.868	346		12.8707	274.1	266.2	12.8707	268.77	263.29	12.8707	286.56	279.56
15.7349	25.7979	15.7349	17.11	15.7349	19.1064		11.8847	289	11.8847	291	11.8847	291		12.8874	274.07	265.95	12.8874	268.71	263.09	12.8874	286.53	279.34
15.7548	25.7128	15.7548	17.94	15.7548	18.133		11.9014	268	11.9014	288	11.9014	314		12.9041	274.05	265.71	12.9041	268.67	262.89	12.9041	286.51	279.13
15.7746	25.7766	15.7746	17.79	15.7746	18.0426		11.9181	285	11.9181	277	11.9181	319		12.9208	274.04	265.47	12.9208	268.63	262.69	12.9208	286.49	278.92
15.7945	26.4255	15.7945	17.68	15.7945	18.1862		11.9349	323	11.9349	268	11.9349	300		12.9375	274	265.23	12.9375	268.56	262.49	12.9375	286.45	278.71
15.8143	26.4362	15.8143	17.5	15.8143	18.3457		11.9516	301	11.9516	305	11.9516	321		12.9542	274.01	264.99	12.9542	268.54	262.3	12.9542	286.46	278.5
15.8341	25.8617	15.8341	18.23	15.8341	18.7979		11.9683	314	11.9683	260	11.9683	334		12.971	274.04	264.75	12.971	268.53	262.1	12.971	286.48	278.29
15.854	26.3073	15.854	17.99	15.854	18.7031		11.985	290	11.985	291	11.985	315		12.9877	274.09	264.52	12.9877	268.52	261.91	12.9877	286.52	278.08
15.8738	25.0781	15.8738	18.28	15.8738	18.3385		12.0017	296	12.0017	280	12.0017	298		13.0044	274.15	264.28	13.0044	268.54	261.71	13.0044	286.58	277.88
15.8937	25.849	15.8937	18.42	15.8937	18.2865		12.0184	338	12.0184	279	12.0184	303		13.0211	274.24	264.04	13.0211	268.56	261.52	13.0211	286.64	277.67
15.9135	25.8125	15.9135	18.28	15.9135	18.9167		12.0351	300	12.0351	309	12.0351	312		13.0378	274.34	263.81	13.0378	268.6	261.33	13.0378	286.73	277.47
15.9333	25.6406	15.9333	17.99	15.9333	18.474		12.0518	259	12.0518	275	12.0518	308		13.0545	274.46	263.58	13.0545	268.65	261.13	13.0545	286.83	277.27
15.9532	25.2188	15.9532	17.91	15.9532	18.4792		12.0685	317	12.0685	335	12.0685	321		13.0712	274.61	263.35	13.0712	268.72	260.94	13.0712	286.96	277.07
15.973	25.7292	15.973	18.46	15.973	18.0625		12.0853	310	12.0853	283	12.0853	303		13.0879	274.78	263.11	13.0879	268.81	260.75	13.0879	287.1	276.87
15.9929	26.0365	15.9929	17.56	15.9929	18.6146		12.102	291	12.102	303	12.102	361		13.1046	274.97	262.88	13.1046	268.91	260.56	13.1046	287.27	276.67
16.0127	25.7396	16.0127	18.19	16.0127	18.6719		12.1187	328	12.1187	291	12.1187	318		13.1214	275.2	262.65	13.1214	269.04	260.37	13.1214	287.46	276.47
16.0325	25.5156	16.0325	17.8	16.0325	18.5625		12.1354	320	12.1354	306	12.1354	307		13.1381	275.45	262.43	13.1381	269.19	260.19	13.1381	287.68	276.27
16.0524	25.8281	16.0524	17.95	16.0524	18.474		12.1521	329	12.1521	267	12.1521	334		13.1548	275.74	262.2	13.1548	269.36	260	13.1548	287.93	276.07
16.0722	25.2813	16.0722	18.26	16.0722	18.9323		12.1688	345	12.1688	338	12.1688	339		13.1715	276.07	261.97	13.1715	269.56	259.81	13.1715	288.2	275.88
16.092	26.3594	16.092	17.42	16.092	18.7865		12.1855	327	12.1855	312	12.1855	335		13.1882	276.43	261.75	13.1882	269.78	259.63	13.1882	288.52	275.68
16.1119	25.8542	16.1119	18.22	16.1119	18.8333		12.2022	318	12.2022	313	12.2022	333		13.2049	276.84	261.52	13.2049	270.04	259.44	13.2049	288.87	275.49
16.1317	25.8177	16.1317	17.7	16.1317	19.1667		12.2189	342	12.2189	315	12.2189	338		13.2216	277.3	261.3	13.2216	270.33	259.26	13.2216	289.26	275.3
16.1516	26.1684	16.1516	17.97	16.1516	18.0255		12.2356	304	12.2356	327	12.2356	333		13.2383	277.81	261.07	13.2383	270.66	259.07	13.2383	289.69	275.11
16.1714	26.4592	16.1714	17.94	16.1714	19.352		12.2524	308	12.2524	303	12.2524	335		13.255	278.37	260.85	13.255	271.03	258.89	13.255	290.18	274.92
16.1912	26.5867	16.1912	17.86	16.1912	18.3214		12.2691	284	12.2691	291	12.2691	320		13.2718	279	260.63	13.2718	271.45	258.71	13.2718	290.71	274.73
16.2111	25.8061	16.2111	17.32	16.2111	18.1735		12.2858	318	12.2858	295	12.2858	321		13.2885	279.71	260.41	13.2885	271.92	258.53	13.2885	291.31	274.54
16.2309	26.1735	16.2309	17.96	16.2309	18.2755		12.3025	295	12.3025	255	12.3025	329		13.3052	280.48	260.19	13.3052	272.45	258.35	13.3052	291.98	274.36
16.2508	26.3622	16.2508	17.71	16.2508	18.2296		12.3192	302	12.3192	243	12.3192	330		13.3219	281.35	259.97	13.3219	273.04	258.17	13.3219	292.71	274.17
16.2706	25.1071	16.2706	18.44	16.2706	18.3214		12.3359	275	12.3359	274	12.3359	292		13.3386	282.31	259.76	13.3386	273.7	257.99	13.3386	293.53	273.99
16.2904	24.8929	16.2904	18.18	16.2904	18.7857		12.3526	254	12.3526	266	12.3526	265		13.3553	283.39	259.54	13.3553	274.44	257.81	13.3553	294.44	273.8
16.3103	25.1633	16.3103	18.4	16.3103	18.2092		12.3693	264	12.3693	290	12.3693	325		13.372	284.58	259.33	13.372	275.27	257.64	13.372	295.45	273.62
16.3301	25.6684	16.3301	17.39	16.3301	18.75		12.386	297	12.386	275	12.386	261		13.3887	285.49	259.11	13.3887	275.9	257.46	13.3887	296.23	273.44
16.35	26.0204	16.35	17.4	16.35	18.2908		12.4028	292	12.4028	240	12.4028	300		13.4054	286.92	258.9	13.4054	276.91	257.29	13.4054	297.43	273.26
16.3698	25.6276	16.3698	18.12	16.3698	17.8418		12.4195	294	12.4195	262	12.4195	288		13.4221	288.52	258.69	13.4221	278.05	257.11	13.4221	298.78	273.08
16.3896	26.2347	16.3896	18.23	16.3896	17.9694		12.4362	286	12.4362	303	12.4362	307		13.4389	290.31	258.47	13.4389	279.33	256.94	13.4389	300.28	272.9
16.4095	26.2398	16.4095	17.95	16.4095	18.2755		12.4529	270	12.4529	278	12.4529	325		13.4556	292.3	258.26	13.4556	280.77	256.76	13.4556	301.95	272.72
16.4293	25.7551	16.4293	17.96	16.4293	18.2653		12.4696	257	12.4696	281	12.4696	303		13.4723	294.54	258.05	13.4723	282.39	256.59	13.4723	303.81	272.55
16.4492	25.7347	16.4492	17.9	16.4492	18.602		12.4863	296	12.4863	254	12.4863	295		13.489	297.04	257.85	13.489	284.21	256.42	13.489	305.89	272.37
16.469	25.6327	16.469	18.08	16.469	18.5918		12.503	288	12.503	263	12.503	289		13.5057	299.84	257.64	13.5057	286.27	256.25	13.5057	308.21	272.2
16.4888	26	16.4888	17.73	16.4888	18.4898		12.5197	257	12.5197	276	12.5197	293		13.5224	302.98	257.43	13.5224	288.6	256.08	13.5224	310.81	272.02
16.5087	25.36	16.5087	18.01	16.5087	18.41		12.5365	265	12.5365	279	12.5365	300		13.5391	306.52	257.23	13.5391	291.23	255.91	13.5391	313.72	271.85
16.5285	25.24	16.5285	18.14	16.5285	18.95		12.5532	276	12.5532	284	12.5532	345		13.5558	310.49	257.02	13.5558	294.21	255.74	13.5558	316.97	271.68
16.5484	25.74	16.5484	17.59	16.5484	18.115		12.5699	309	12.5699	297	12.5699	295		13.5726	314.96	256.82	13.5726	297.58	255.57	13.5726	320.62	271.51
16.5682	26.17	16.5682	17.61	16.5682	18.33		12.5866	265	12.5866	243	12.5866	283		13.5893	320	256.62	13.5893	301.4	255.41	13.5893	324.71	271.34
16.588	25.075	16.588	17.44	16.588	18.85		12.6033	281	12.6033	257	12.6033	260		13.606	325.67	256.41	13.606	305.73	255.24	13.606	329.3	271.17
16.6079	26.165	16.6079	18.02	16.6079	18.305		12.62	278	12.62	284	12.62	295		13.6227	332.06	256.21	13.6227	310.64	255.08	13.6227	334.44	271.01
16.6277	25.84	16.6277	17.79	16.6277	18.155		12.6367	274	12.6367	287	12.6367	278		13.6394	339.26	256.01	13.6394	316.19	254.91	13.6394	340.21	270.84
16.6475	25.275	16.6475	17.9	16.6475	18.42		12.6534	269	12.6534	243	12.6534	279		13.6561	347.36	255.81	13.6561	322.48	254.75	13.6561	346.67	270.67
16.6674	26.045	16.6674	17.52	16.6674	18.955		12.6701	309	12.6701	281	12.6701	301		13.6728	356.48	255.62	13.6728	329.6	254.58	13.6728	353.91	270.51
16.6872	26.06	16.6872	18.09	16.6872	17.91		12.6869	287	12.6869	235	12.6869	323		13.6895	366.75	255.42	13.6895	337.64	254.42	13.6895	362.02	270.35
16.7071	25.67	16.7071	17.57	16.7071	18.2		12.7036	304	12.7036	268	12.7036	276		13.7062	378.29	255.22	13.7062	346.74	254.26	13.7062	371.1	270.19
16.7269	25.97	16.7269	17.25	16.7269	18.535		12.7203	254	12.7203	268	12.7203	296		13.723	391.28	255.03	13.723	357.02	254.1	13.723	381.28	270.02
16.7467	25.37	16.7467	17.74	16.7467	18.725		12.737	271	12.737	254	12.737	284		13.7397	405.87	254.83	13.7397	368.61	253.94	13.7397	392.65	269.86
16.7666	25.76	16.7666	17.71	16.7666	18.445		12.7537	271	12.7537	265	12.7537	312		13.7564	422.27	254.64	13.7564	381.7	253.78	13.7564	405.38	269.71
16.7864	26.085	16.7864	17.23	16.7864	18.5		12.7704	274	12.7704	264	12.7704	286		13.7731	440.69	254.45	13.7731	396.48	253.62	13.7731	419.62	269.55
16.8063	25.535	16.8063	17.93	16.8063	18.56		12.7871	274	12.7871	249	12.7871	298		13.7898	461.39	254.26	13.7898	413.17	253.47	13.7898	435.54	269.39
16.8261	25.2353	16.8261	17.84	16.8261	18.7157		12.8038	278	12.8038	248	12.8038	290		13.8065	484.64	254.07	13.8065	432.02	253.31	13.8065	453.33	269.24
16.8459	25.5833	16.8459	17.94	16.8459	18.5147		12.8206	294	12.8206	242	12.8206	300		13.8232	510.78	253.88	13.8232	453.33	253.15	13.8232	473.21	269.08
16.8658	25.7843	16.8658	17.51	16.8658	18.4314		12.8373	314	12.8373	322	12.8373	306		13.8399	533.83	253.69	13.8399	472.02	253	13.8399	491.01	268.93
16.8856	26.1471	16.8856	17.8	16.8856	18.3922		12.854	281	12.854	267	12.854	300		13.8566	566.5	253.5	13.8566	498.97	252.84	13.8566	515.59	268.77
16.9055	25.8824	16.9055	17.92	16.9055	18.5196		12.8707	304	12.8707	289	12.8707	287		13.8734	603.19	253.31	13.8734	529.46	252.69	13.8734	542.97	268.62
16.9253	25.7108	16.9253	17.43	16.9253	18.6176		12.8874	273	12.8874	281	12.8874	295		13.8901	644.32	253.13	13.8901	563.88	252.54	13.8901	573.4	268.47
16.9451	25.4363	16.9451	17.54	16.9451	18.0882		12.9041	252	12.9041	283	12.9041	293		13.9068	690.28	252.94	13.9068	602.64	252.38	13.9068	607.06	268.32
16.965	26.6373	16.965	17.45	16.965	18.5343		12.9208	251	12.9208	312	12.9208	300		13.9235	741.43	252.76	13.9235	646.12	252.23	13.9235	644.1	268.17
16.9848	25.8529	16.9848	17.98	16.9848	18.8039		12.9375	288	12.9375	238	12.9375	280		13.9402	798.01	252.58	13.9402	694.6	252.08	13.9402	684.57	268.02
17.0047	25.2108	17.0047	18.06	17.0047	18.2451		12.9542	289	12.9542	266	12.9542	308		13.9569	860.14	252.39	13.9569	748.3	251.93	13.9569	728.4	267.88
17.0245	25.25	17.0245	17.64	17.0245	18.4755		12.971	236	12.971	263	12.971	289		13.9736	927.72	252.21	13.9736	807.19	251.78	13.9736	775.3	267.73
17.0443	25.8333	17.0443	17.77	17.0443	18		12.9877	266	12.9877	254	12.9877	293		13.9903	1000.32	252.03	13.9903	871.02	251.64	13.9903	824.79	267.59
17.0642	25.9265	17.0642	17.71	17.0642	18.2598		13.0044	289	13.0044	250	13.0044	264		14.007	1076.95	251.85	14.007	938.94	251.49	14.007	875.94	267.44
17.084	25.6961	17.084	17.76	17.084	18.2549		13.0211	249	13.0211	296	13.0211	297		14.0238	1156.15	251.68	14.0238	1009.67	251.34	14.0238	927.53	267.3
17.1039	25.652	17.1039	17.76	17.1039	18.451		13.0378	280	13.0378	268	13.0378	295		14.0405	1235.66	251.5	14.0405	1081.09	251.2	14.0405	977.86	267.16
17.1237	26.0637	17.1237	17.66	17.1237	18.299		13.0545	281	13.0545	278	13.0545	278		14.0572	1312.42	251.32	14.0572	1150.27	251.05	14.0572	1024.79	267.02
17.1435	25.7452	17.1435	17.79	17.1435	19.226		13.0712	275	13.0712	269	13.0712	303		14.0739	1382.62	251.15	14.0739	1213.42	250.91	14.0739	1065.87	266.88
17.1634	26.2596	17.1634	17.86	17.1634	18.5865		13.0879	283	13.0879	283	13.0879	293		14.0906	1441.86	250.97	14.0906	1266.19	250.76	14.0906	1098.45	266.74
17.1832	26.0721	17.1832	17.64	17.1832	18.7019		13.1046	279	13.1046	284	13.1046	292		14.1073	1485.64	250.8	14.1073	1304.07	250.62	14.1073	1120.08	266.6
17.203	26.2548	17.203	18.49	17.203	19.1346		13.1213	269	13.1213	285	13.1213	263		14.124	1509.87	250.63	14.124	1323.09	250.48	14.124	1128.78	266.46
17.2229	26.2404	17.2229	18.26	17.2229	18.2019		13.1381	255	13.1381	281	13.1381	301		14.1407	1511.74	250.46	14.1407	1320.69	250.34	14.1407	1123.46	266.33
17.2427	26.3365	17.2427	18.37	17.2427	18.6923		13.1548	273	13.1548	282	13.1548	305		14.1575	1490.25	250.29	14.1575	1296.31	250.2	14.1575	1104.16	266.19
17.2626	26.8654	17.2626	18.11	17.2626	19.101		13.1715	296	13.1715	269	13.1715	310		14.1742	1446.54	250.12	14.1742	1251.71	250.06	14.1742	1072.13	266.06
17.2824	29.1298	17.2824	18.57	17.2824	19.2404		13.1882	269	13.1882	293	13.1882	312		14.1909	1383.83	249.95	14.1909	1190.68	249.92	14.1909	1029.62	265.93
17.3022	30.5721	17.3022	19.13	17.3022	19.226		13.2049	297	13.2049	261	13.2049	308		14.2076	1306.94	249.78	14.2076	1118.4	249.78	14.2076	979.6	265.79
17.3221	31.7212	17.3221	18.94	17.3221	19.1538		13.2216	275	13.2216	286	13.2216	321		14.2243	1221.42	249.61	14.2243	1040.48	249.64	14.2243	925.28	265.66
17.3419	30.399	17.3419	18.63	17.3419	19.2692		13.2383	294	13.2383	303	13.2383	276		14.241	1132.71	249.45	14.241	962	249.5	14.241	869.65	265.53
17.3618	28.7308	17.3618	19.13	17.3618	19.4471		13.255	283	13.255	298	13.255	288		14.2577	1045.65	249.28	14.2577	887.13	249.37	14.2577	815.31	265.4
17.3816	27.8269	17.3816	19.31	17.3816	19.4375		13.2718	275	13.2718	265	13.2718	273		14.2744	963.75	249.12	14.2744	818.54	249.23	14.2744	764.09	265.28
17.4014	26.8029	17.4014	18.47	17.4014	19.7692		13.2885	306	13.2885	271	13.2885	277		14.2911	889.3	248.96	14.2911	757.63	249.1	14.2911	717.14	265.15
17.4213	25.9663	17.4213	18.77	17.4213	19.125		13.3052	316	13.3052	281	13.3052	288		14.3079	823.43	248.79	14.3079	704.75	248.96	14.3079	675	265.02
17.4411	26.0192	17.4411	18.83	17.4411	18.976		13.3219	288	13.3219	284	13.3219	311		14.3246	769.99	248.63	14.3246	662.5	248.83	14.3246	640.39	264.9
17.461	26.0288	17.461	18.76	17.461	19.0577		13.3386	280	13.3386	231	13.3386	309		14.3413	720.75	248.47	14.3413	623.61	248.7	14.3413	607.34	264.77
17.4808	26.3221	17.4808	18.62	17.4808	19.2788		13.3553	290	13.3553	275	13.3553	318		14.358	679.04	248.31	14.358	590.44	248.57	14.358	578.34	264.65
17.5006	26.7596	17.5006	18.73	17.5006	19.4615		13.372	244	13.372	290	13.372	314		14.3747	643.77	248.15	14.3747	561.84	248.44	14.3747	552.75	264.53
17.5205	26.3915	17.5205	18.18	17.5205	19.1038		13.3887	325	13.3887	308	13.3887	331		14.3914	613.81	248	14.3914	536.79	248.31	14.3914	529.96	264.4
17.5403	25.8585	17.5403	17.98	17.5403	18.8962		13.4054	278	13.4054	291	13.4054	301		14.4081	588.01	247.84	14.4081	514.39	248.18	14.4081	509.39	264.28
17.5602	25.8113	17.5602	18.39	17.5602	19.0802		13.4222	297	13.4222	309	13.4222	323		14.4248	565.35	247.68	14.4248	493.94	248.05	14.4248	490.55	264.16
17.58	25.3255	17.58	18.17	17.58	18.533		13.4389	305	13.4389	278	13.4389	335		14.4415	544.93	247.53	14.4415	474.92	247.92	14.4415	473.07	264.05
17.5998	26.283	17.5998	18.78	17.5998	19.2264		13.4556	314	13.4556	311	13.4556	342		14.4582	526.04	247.38	14.4582	457.02	247.8	14.4582	456.69	263.93
17.6197	25.9953	17.6197	18.34	17.6197	18.8915		13.4723	290	13.4723	287	13.4723	334		14.475	508.15	247.22	14.475	440.04	247.67	14.475	441.26	263.81
17.6395	26.0283	17.6395	18.06	17.6395	18.7217		13.489	315	13.489	286	13.489	295		14.4917	490.91	247.07	14.4917	423.92	247.54	14.4917	426.69	263.7
17.6594	25.1085	17.6594	18.64	17.6594	18.6981		13.5057	296	13.5057	269	13.5057	304		14.5084	474.1	246.92	14.5084	408.66	247.42	14.5084	412.96	263.58
17.6792	25.934	17.6792	18.47	17.6792	18.3679		13.5224	297	13.5224	309	13.5224	331		14.5251	457.7	246.77	14.5251	394.31	247.3	14.5251	400.1	263.47
17.699	26.2123	17.699	18.64	17.699	18.6368		13.5391	301	13.5391	279	13.5391	323		14.5418	441.71	246.62	14.5418	380.9	247.17	14.5418	388.11	263.35
17.7189	25.566	17.7189	18.4	17.7189	18.7547		13.5558	305	13.5558	290	13.5558	314		14.5585	426.26	246.47	14.5585	368.49	247.05	14.5585	377.01	263.24
17.7387	25.9292	17.7387	18.01	17.7387	19.0047		13.5725	321	13.5725	277	13.5725	347		14.5752	411.45	246.33	14.5752	357.08	246.93	14.5752	366.81	263.13
17.7585	25.5849	17.7585	18.48	17.7585	18.7217		13.5893	323	13.5893	301	13.5893	319		14.5919	397.4	246.18	14.5919	346.66	246.81	14.5919	357.48	263.02
17.7784	26.0613	17.7784	18.54	17.7784	19.0991		13.606	362	13.606	317	13.606	366		14.6086	384.22	246.03	14.6086	337.22	246.69	14.6086	349.01	262.91
17.7982	25.9769	17.7982	18.48	17.7982	18.8565		13.6227	350	13.6227	290	13.6227	333		14.6254	371.97	245.89	14.6254	328.7	246.57	14.6254	341.35	262.8
17.8181	26.0185	17.8181	18.31	17.8181	18.625		13.6394	340	13.6394	340	13.6394	374		14.6421	360.68	245.75	14.6421	321.03	246.45	14.6421	334.44	262.69
17.8379	26.0324	17.8379	18.28	17.8379	18.5509		13.6561	362	13.6561	339	13.6561	368		14.6588	350.36	245.6	14.6588	314.16	246.33	14.6588	328.22	262.59
17.8577	25.8472	17.8577	17.73	17.8577	18.7963		13.6728	354	13.6728	364	13.6728	343		14.6755	340.98	245.46	14.6755	308.02	246.21	14.6755	322.64	262.48
17.8776	26.0417	17.8776	18.5	17.8776	19.25		13.6895	372	13.6895	371	13.6895	349		14.6922	332.5	245.32	14.6922	302.53	246.1	14.6922	317.64	262.38
17.8974	25.6852	17.8974	18.04	17.8974	18.713		13.7062	356	13.7062	345	13.7062	384		14.7089	324.85	245.18	14.7089	297.62	245.98	14.7089	313.14	262.27
17.9173	25.6944	17.9173	19.08	17.9173	18.7824		13.723	404	13.723	321	13.723	371		14.7256	317.97	245.04	14.7256	293.23	245.87	14.7256	309.1	262.17
17.9371	25.7824	17.9371	18.63	17.9371	18.8704		13.7397	384	13.7397	378	13.7397	363		14.7423	311.79	244.9	14.7423	289.3	245.75	14.7423	305.48	262.07
17.9569	25.8611	17.9569	18.05	17.9569	18.3981		13.7564	420	13.7564	427	13.7564	393		14.7591	306.25	244.77	14.7591	285.78	245.64	14.7591	302.21	261.97
17.9768	25.7778	17.9768	18.32	17.9768	19.0278		13.7731	433	13.7731	433	13.7731	423		14.7758	301.26	244.63	14.7758	282.61	245.53	14.7758	299.26	261.86
17.9966	26.4028	17.9966	18.43	17.9966	18.9074		13.7898	414	13.7898	416	13.7898	474		14.7925	296.79	244.49	14.7925	279.76	245.41	14.7925	296.59	261.77
18.0165	26.0694	18.0165	18.85	18.0165	18.7037		13.8065	457	13.8065	427	13.8065	434		14.8092	292.76	244.36	14.8092	277.19	245.3	14.8092	294.18	261.67
18.0363	26.7963	18.0363	18.44	18.0363	18.4954		13.8232	510	13.8232	479	13.8232	466		14.8259	289.37	244.23	14.8259	275.03	245.19	14.8259	292.14	261.57
18.0561	26.5046	18.0561	18.51	18.0561	18.9028		13.8399	527	13.8399	468	13.8399	479		14.8426	286.07	244.09	14.8426	272.91	245.08	14.8426	290.13	261.47
18.076	25.7315	18.076	18.96	18.076	18.9815		13.8567	567	13.8567	464	13.8567	506		14.8593	283.08	243.96	14.8593	270.98	244.97	14.8593	288.3	261.38
18.0958	26.3889	18.0958	19.08	18.0958	18.75		13.8734	595	13.8734	503	13.8734	486		14.876	280.36	243.83	14.876	269.23	244.87	14.876	286.63	261.28
18.1157	26.4722	18.1157	19.29	18.1157	19.4306		13.8901	601	13.8901	535	13.8901	527		14.8927	277.9	243.7	14.8927	267.62	244.76	14.8927	285.09	261.19
18.1355	26.3472	18.1355	19.35	18.1355	18.4444		13.9068	693	13.9068	593	13.9068	582		14.9095	275.64	243.57	14.9095	266.15	244.65	14.9095	283.68	261.09
18.1553	27.4537	18.1553	19.58	18.1553	19.0139		13.9235	744	13.9235	671	13.9235	590		14.9262	273.59	243.44	14.9262	264.8	244.54	14.9262	282.37	261
18.1752	26.7407	18.1752	18.96	18.1752	19.0278		13.9402	777	13.9402	646	13.9402	663		14.9429	271.7	243.32	14.9429	263.56	244.44	14.9429	281.17	260.91
18.195	26.7455	18.195	19.17	18.195	19.1318		13.9569	846	13.9569	731	13.9569	681		14.9596	269.97	243.19	14.9596	262.42	244.33	14.9596	280.06	260.82
18.2149	26.5	18.2149	18.99	18.2149	18.8909		13.9736	911	13.9736	716	13.9736	688		14.9763	268.38	243.06	14.9763	261.36	244.23	14.9763	279.03	260.73
18.2347	26.4136	18.2347	18.76	18.2347	19.2182		13.9903	975	13.9903	812	13.9903	779		14.993	266.9	242.94	14.993	260.38	244.13	14.993	278.07	260.64
18.2545	26.75	18.2545	19.24	18.2545	19.2955		14.007	1054	14.007	905	14.007	825		15.0097	265.54	242.82	15.0097	259.46	244.02	15.0097	277.18	260.55
18.2744	27.0409	18.2744	18.86	18.2744	19.4636		14.0238	1082	14.0238	970	14.0238	919		15.0264	264.28	242.69	15.0264	258.61	243.92	15.0264	276.34	260.46
18.2942	26.7818	18.2942	18.99	18.2942	19.5773		14.0405	1256	14.0405	1094	14.0405	941		15.0432	263.1	242.57	15.0432	257.82	243.82	15.0432	275.56	260.38
18.314	26.3909	18.314	19.28	18.314	19.0955		14.0572	1384	14.0572	1223	14.0572	1090		15.0599	262.01	242.45	15.0599	257.08	243.72	15.0599	274.83	260.29
18.3339	26.0091	18.3339	18.08	18.3339	19.2091		14.0739	1460	14.0739	1250	14.0739	1241		15.0766	260.99	242.33	15.0766	256.38	243.62	15.0766	274.15	260.21
18.3537	27.3409	18.3537	18.75	18.3537	19.05		14.0906	1559	14.0906	1395	14.0906	1281		15.0933	260.03	242.21	15.0933	255.73	243.52	15.0933	273.51	260.12
18.3736	26.5045	18.3736	18.97	18.3736	19.0409		14.1073	1694	14.1073	1453	14.1073	1249		15.11	259.13	242.09	15.11	255.11	243.42	15.11	272.9	260.04
18.3934	26.6636	18.3934	18.66	18.3934	19.5091		14.124	1731	14.124	1588	14.124	1339		15.1267	258.29	241.97	15.1267	254.53	243.33	15.1267	272.33	259.96
18.4132	26.5364	18.4132	18.68	18.4132	19.3636		14.1407	1795	14.1407	1462	14.1407	1327		15.1434	257.5	241.86	15.1434	253.99	243.23	15.1434	271.79	259.88
18.4331	26.9727	18.4331	19.14	18.4331	19.1182		14.1575	1611	14.1575	1457	14.1575	1218		15.1601	256.75	241.74	15.1601	253.47	243.13	15.1601	271.28	259.8
18.4529	27.125	18.4529	19.85	18.4529	19.942		14.1742	1561	14.1742	1325	14.1742	1129		15.1768	256.05	241.63	15.1768	252.98	243.04	15.1768	270.8	259.72
18.4728	27.6429	18.4728	19.68	18.4728	20.1071		14.1909	1333	14.1909	1176	14.1909	989		15.1936	255.38	241.51	15.1936	252.52	242.94	15.1936	270.34	259.64
18.4926	28.0804	18.4926	19.75	18.4926	19.8304		14.2076	1180	14.2076	999	14.2076	836		15.2103	254.75	241.4	15.2103	252.08	242.85	15.2103	269.91	259.56
18.5124	28.3795	18.5124	19.91	18.5124	19.9598		14.2243	1027	14.2243	880	14.2243	767		15.227	254.15	241.29	15.227	251.66	242.76	15.227	269.5	259.48
18.5323	28.6205	18.5323	20.25	18.5323	20.7679		14.241	912	14.241	778	14.241	698		15.2437	253.58	241.18	15.2437	251.26	242.66	15.2437	269.11	259.4
18.5521	28.8259	18.5521	20.03	18.5521	20.4911		14.2577	826	14.2577	705	14.2577	616		15.2604	253.03	241.06	15.2604	250.87	242.57	15.2604	268.74	259.33
18.572	28.8705	18.572	20.57	18.572	21.2946		14.2744	772	14.2744	650	14.2744	593		15.2771	252.52	240.96	15.2771	250.51	242.48	15.2771	268.39	259.25
18.5918	29.1161	18.5918	20.88	18.5918	21.0938		14.2911	720	14.2911	627	14.2911	613		15.2938	252.02	240.85	15.2938	250.16	242.39	15.2938	268.06	259.18
18.6116	29.433	18.6116	20.78	18.6116	20.9866		14.3079	730	14.3079	583	14.3079	567		15.3105	251.55	240.74	15.3105	249.83	242.3	15.3105	267.74	259.11
18.6315	28.9554	18.6315	20.84	18.6315	20.5982		14.3246	691	14.3246	615	14.3246	627		15.3272	251.2	240.63	15.3272	249.57	242.21	15.3272	267.48	259.03
18.6513	27.7946	18.6513	20.56	18.6513	21.2768		14.3413	639	14.3413	582	14.3413	563		15.344	250.76	240.52	15.344	249.26	242.12	15.344	267.19	258.96
18.6712	29.2232	18.6712	20.94	18.6712	20.7723		14.358	624	14.358	573	14.358	574		15.3607	250.34	240.42	15.3607	248.96	242.04	15.3607	266.92	258.89
18.691	28.1339	18.691	20.12	18.691	20.2188		14.3747	644	14.3747	622	14.3747	533		15.3774	249.93	240.31	15.3774	248.67	241.95	15.3774	266.65	258.82
18.7108	28.4732	18.7108	20.39	18.7108	20.2054		14.3914	617	14.3914	492	14.3914	525		15.3941	249.54	240.21	15.3941	248.39	241.86	15.3941	266.41	258.75
18.7307	27.558	18.7307	20.5	18.7307	20.5357		14.4081	575	14.4081	574	14.4081	498		15.4108	249.16	240.11	15.4108	248.11	241.78	15.4108	266.17	258.68
18.7505	27.4063	18.7505	21.36	18.7505	19.9018		14.4248	593	14.4248	518	14.4248	493		15.4275	248.8	240.01	15.4275	247.85	241.69	15.4275	265.96	258.62
18.7704	27.7768	18.7704	21.15	18.7704	20.0714		14.4415	597	14.4415	538	14.4415	473		15.4442	248.45	239.9	15.4442	247.6	241.61	15.4442	265.76	258.55
18.7902	27.8795	18.7902	20.9	18.7902	19.9821		14.4582	569	14.4582	494	14.4582	496		15.4609	248.11	239.8	15.4609	247.36	241.53	15.4609	265.57	258.48
18.81	27.1518	18.81	20.2	18.81	19.9063		14.475	515	14.475	484	14.475	450		15.4776	247.79	239.7	15.4776	247.12	241.44	15.4776	265.4	258.42
18.8299	28.2991	18.8299	20.51	18.8299	20.5446		14.4917	559	14.4917	451	14.4917	446		15.4943	247.48	239.61	15.4943	246.89	241.36	15.4943	265.25	258.35
18.8497	27.3884	18.8497	20.39	18.8497	21.1161		14.5084	542	14.5084	445	14.5084	439		15.5111	247.17	239.51	15.5111	246.67	241.28	15.5111	265.13	258.29
18.8695	27.9955	18.8695	20.32	18.8695	19.933		14.5251	507	14.5251	411	14.5251	457		15.5278	246.88	239.41	15.5278	246.46	241.2	15.5278	265.03	258.23
18.8894	27.7368	18.8894	19.89	18.8894	20.4211		14.5418	464	14.5418	432	14.5418	459		15.5445	246.59	239.32	15.5445	246.25	241.12	15.5445	264.97	258.16
18.9092	28.1053	18.9092	20.28	18.9092	20.6535		14.5585	449	14.5585	399	14.5585	364		15.5612	246.32	239.22	15.5612	246.05	241.04	15.5612	264.93	258.1
18.9291	28.6886	18.9291	20.4	18.9291	19.8421		14.5752	475	14.5752	378	14.5752	390		15.5779	246.05	239.13	15.5779	245.85	240.96	15.5779	264.93	258.04
18.9489	27.9079	18.9489	20.91	18.9489	20.4561		14.5919	401	14.5919	364	14.5919	363		15.5946	245.79	239.03	15.5946	245.66	240.88	15.5946	265	257.98
18.9687	28.386	18.9687	20.02	18.9687	20.4605		14.6087	374	14.6087	337	14.6087	363		15.6113	245.54	238.94	15.6113	245.48	240.81	15.6113	265.13	257.92
18.9886	28.5439	18.9886	20.53	18.9886	20.614		14.6254	404	14.6254	339	14.6254	346		15.628	245.3	238.85	15.628	245.3	240.73	15.628	265.46	257.86
19.0084	28.7193	19.0084	20.92	19.0084	19.8333		14.6421	347	14.6421	334	14.6421	365		15.6448	245.06	238.76	15.6448	245.12	240.65	15.6448	265.9	257.81
19.0283	28.7281	19.0283	20.39	19.0283	20.5175		14.6588	315	14.6588	333	14.6588	355		15.6615	244.83	238.66	15.6615	244.95	240.58	15.6615	266.25	257.75
19.0481	27.636	19.0481	20.36	19.0481	20.4254		14.6755	348	14.6755	300	14.6755	358		15.6782	244.61	238.58	15.6782	244.79	240.5	15.6782	266.2	257.69
19.0679	28.2895	19.0679	20.47	19.0679	20.386		14.6922	313	14.6922	312	14.6922	305		15.6949	244.39	238.49	15.6949	244.62	240.43	15.6949	265.95	257.64
19.0878	28.3147	19.0878	20.14	19.0878	20.1466		14.7089	330	14.7089	306	14.7089	276		15.7116	244.17	238.4	15.7116	244.47	240.36	15.7116	265.72	257.58
19.1076	29.0216	19.1076	20.38	19.1076	20.7586		14.7256	316	14.7256	330	14.7256	276		15.7283	243.97	238.31	15.7283	244.31	240.28	15.7283	265.76	257.53
19.1275	29.3017	19.1275	21	19.1275	21.194		14.7423	331	14.7423	262	14.7423	323		15.745	243.76	238.23	15.745	244.16	240.21	15.745	265.98	257.48
19.1473	29.9741	19.1473	20.98	19.1473	21.8017		14.7591	312	14.7591	293	14.7591	295		15.7617	243.57	238.14	15.7617	244.01	240.14	15.7617	266.33	257.42
19.1671	30.6552	19.1671	21.57	19.1671	21.9138		14.7758	297	14.7758	295	14.7758	292		15.7784	243.37	238.05	15.7784	243.87	240.07	15.7784	266.6	257.37
19.187	31.2586	19.187	22.31	19.187	21.4784		14.7925	312	14.7925	300	14.7925	295		15.7952	243.19	237.97	15.7952	243.73	240	15.7952	266.62	257.32
19.2068	32.7241	19.2068	22.97	19.2068	22.7672		14.8092	284	14.8092	293	14.8092	300		15.8119	243	237.89	15.8119	243.59	239.93	15.8119	266.34	257.27
19.2267	32.6336	19.2267	23.59	19.2267	22.5172		14.8259	297	14.8259	275	14.8259	277		15.8286	242.82	237.81	15.8286	243.46	239.86	15.8286	265.83	257.22
19.2465	32.7586	19.2465	23.89	19.2465	22.8491		14.8426	308	14.8426	278	14.8426	290		15.8453	242.65	237.72	15.8453	243.33	239.8	15.8453	265.25	257.17
19.2663	33	19.2663	23.86	19.2663	23.3966		14.8593	256	14.8593	244	14.8593	305		15.862	242.48	237.64	15.862	243.2	239.73	15.862	264.68	257.12
19.2862	33.0345	19.2862	24.04	19.2862	22.9224		14.876	308	14.876	288	14.876	296		15.8787	242.32	237.56	15.8787	243.08	239.66	15.8787	264.32	257.08
19.306	32.9353	19.306	24.34	19.306	22.8879		14.8927	291	14.8927	288	14.8927	285		15.8954	242.15	237.48	15.8954	242.95	239.6	15.8954	264.13	257.03
19.3259	31.7672	19.3259	23.98	19.3259	22.5948		14.9095	250	14.9095	280	14.9095	325		15.9121	241.99	237.41	15.9121	242.83	239.53	15.9121	264.11	256.98
19.3457	31.931	19.3457	23.73	19.3457	22.4655		14.9262	259	14.9262	269	14.9262	295		15.9288	241.84	237.33	15.9288	242.71	239.47	15.9288	264.25	256.94
19.3655	31.7845	19.3655	22.94	19.3655	22.1681		14.9429	294	14.9429	262	14.9429	309		15.9455	241.68	237.25	15.9455	242.6	239.4	15.9455	264.57	256.89
19.3854	31.9052	19.3854	22.83	19.3854	22.2198		14.9596	269	14.9596	244	14.9596	288		15.9623	241.53	237.18	15.9623	242.49	239.34	15.9623	265.11	256.85
19.4052	31.5862	19.4052	23.33	19.4052	22.4957		14.9763	293	14.9763	260	14.9763	278		15.979	241.39	237.1	15.979	242.37	239.28	15.979	265.86	256.8
19.425	31.0905	19.425	22.71	19.425	23.1897		14.993	273	14.993	267	14.993	264		15.9957	241.24	237.03	15.9957	242.27	239.21	15.9957	266.8	256.76
19.4449	31.1552	19.4449	23.2	19.4449	22.3707		15.0097	280	15.0097	265	15.0097	297		16.0124	241.1	236.95	16.0124	242.16	239.15	16.0124	268.14	256.72
19.4647	30.8793	19.4647	22.75	19.4647	22.069		15.0264	258	15.0264	285	15.0264	264		16.0291	240.97	236.88	16.0291	242.05	239.09	16.0291	270.11	256.68
19.4846	30.3362	19.4846	22.58	19.4846	22.1078		15.0432	260	15.0432	260	15.0432	273		16.0458	240.83	236.81	16.0458	241.95	239.03	16.0458	272.96	256.64
19.5044	30.5302	19.5044	22.94	19.5044	21.7974		15.0599	280	15.0599	278	15.0599	287		16.0625	240.7	236.74	16.0625	241.85	238.97	16.0625	277.85	256.6
19.5242	30.7931	19.5242	22.15	19.5242	22.5819		15.0766	264	15.0766	258	15.0766	287		16.0792	240.57	236.67	16.0792	241.75	238.91	16.0792	282.07	256.56
19.5441	30.4569	19.5441	22.8	19.5441	22.2888		15.0933	266	15.0933	269	15.0933	310		16.096	240.44	236.6	16.096	241.66	238.86	16.096	283.4	256.52
19.5639	30.5	19.5639	22.62	19.5639	22.4914		15.11	261	15.11	261	15.11	302		16.1127	240.32	236.53	16.1127	241.56	238.8	16.1127	279.89	256.48
19.5838	30.4915	19.5838	22.36	19.5838	22.0805		15.1267	255	15.1267	264	15.1267	282		16.1294	240.19	236.46	16.1294	241.47	238.74	16.1294	275.13	256.45
19.6036	31.0466	19.6036	23.17	19.6036	22.0297		15.1434	232	15.1434	251	15.1434	267		16.1461	240.07	236.39	16.1461	241.38	238.68	16.1461	271.05	256.41
19.6234	31.2034	19.6234	23.46	19.6234	22.0847		15.1601	261	15.1601	255	15.1601	271		16.1628	239.96	236.32	16.1628	241.29	238.63	16.1628	268.38	256.37
19.6433	30.8347	19.6433	23.17	19.6433	22.3347		15.1768	261	15.1768	258	15.1768	298		16.1795	239.84	236.26	16.1795	241.2	238.57	16.1795	266.89	256.34
19.6631	30.8602	19.6631	23.21	19.6631	21.5127		15.1936	259	15.1936	244	15.1936	311		16.1962	239.73	236.19	16.1962	241.11	238.52	16.1962	266.05	256.3
19.683	29.5678	19.683	22.3	19.683	22.1229		15.2103	259	15.2103	244	15.2103	280		16.2129	239.62	236.13	16.2129	241.03	238.47	16.2129	265.24	256.27
19.7028	30.2966	19.7028	22.37	19.7028	21.5636		15.227	261	15.227	259	15.227	273		16.2296	239.51	236.07	16.2296	240.94	238.41	16.2296	264.53	256.24
19.7226	28.7627	19.7226	21.89	19.7226	21.7331		15.2437	281	15.2437	265	15.2437	260		16.2464	239.4	236	16.2464	240.86	238.36	16.2464	264.09	256.2
19.7425	29.0042	19.7425	21.59	19.7425	21.35		15.2604	265	15.2604	256	15.2604	275		16.2631	239.3	235.94	16.2631	240.78	238.31	16.2631	264.07	256.17
19.7623	29.5042	19.7623	21.39	19.7623	21.325		15.2771	238	15.2771	256	15.2771	275		16.2798	239.19	235.88	16.2798	240.7	238.26	16.2798	264.57	256.14
19.7822	29.0917	19.7822	21.4	19.7822	21.2083		15.2938	273	15.2938	240	15.2938	310		16.2965	239.09	235.82	16.2965	240.62	238.21	16.2965	266.01	256.11
19.802	28.2333	19.802	21.37	19.802	21.25		15.3105	263	15.3105	257	15.3105	274		16.3132	238.99	235.76	16.3132	240.55	238.16	16.3132	267.21	256.08
19.8218	28.6708	19.8218	21.73	19.8218	21.0708		15.3272	247	15.3272	266	15.3272	290		16.3299	238.89	235.7	16.3299	240.47	238.11	16.3299	267.24	256.05
19.8417	29.0625	19.8417	21.15	19.8417	21.1167		15.3439	256	15.3439	247	15.3439	256		16.3466	238.8	235.64	16.3466	240.4	238.06	16.3466	265.36	256.02
19.8615	28.8667	19.8615	21.38	19.8615	21.05		15.3607	260	15.3607	246	15.3607	261		16.3633	238.7	235.58	16.3633	240.33	238.01	16.3633	263.08	255.99
19.8814	28.9583	19.8814	21.51	19.8814	20.6875		15.3774	236	15.3774	243	15.3774	266		16.3801	238.61	235.53	16.3801	240.25	237.96	16.3801	261.21	255.96
19.9012	28.8083	19.9012	21.33	19.9012	21.375		15.3941	266	15.3941	254	15.3941	269		16.3968	238.52	235.47	16.3968	240.19	237.91	16.3968	260.04	255.94
19.921	28.6792	19.921	21.68	19.921	20.4542		15.4108	239	15.4108	269	15.4108	267		16.4135	238.43	235.41	16.4135	240.12	237.87	16.4135	259.47	255.91
19.9409	28.5875	19.9409	20.98	19.9409	21.2		15.4275	269	15.4275	270	15.4275	323		16.4302	238.35	235.36	16.4302	240.05	237.82	16.4302	259.33	255.88
19.9607	29.0958	19.9607	21.59	19.9607	21.2583		15.4442	276	15.4442	240	15.4442	256		16.4469	238.26	235.3	16.4469	239.98	237.78	16.4469	259.3	255.86
19.9805	28.6083	19.9805	21.33	19.9805	21.1833		15.4609	230	15.4609	259	15.4609	287		16.4636	238.18	235.25	16.4636	239.92	237.73	16.4636	259.31	255.83
20.0004	28.475	20.0004	21.27	20.0004	20.5667		15.4776	262	15.4776	240	15.4776	244		16.4803	238.09	235.2	16.4803	239.85	237.69	16.4803	259.3	255.81
20.0202	28.2958	20.0202	21.85	20.0202	21.5167		15.4944	247	15.4944	218	15.4944	254		16.497	238.01	235.15	16.497	239.79	237.64	16.497	259.2	255.79
20.0401	27.8667	20.0401	21.63	20.0401	20.6625		15.5111	231	15.5111	282	15.5111	311		16.5137	237.93	235.09	16.5137	239.73	237.6	16.5137	259.06	255.76
20.0599	28.05	20.0599	21.05	20.0599	21.2333		15.5278	239	15.5278	275	15.5278	274		16.5305	237.85	235.04	16.5305	239.67	237.56	16.5305	258.92	255.74
20.0797	27.6625	20.0797	21.33	20.0797	21.0583		15.5445	296	15.5445	226	15.5445	300		16.5472	237.78	234.99	16.5472	239.61	237.52	16.5472	258.84	255.72
20.0996	27.6333	20.0996	21.92	20.0996	21.15		15.5612	253	15.5612	220	15.5612	249		16.5639	237.7	234.94	16.5639	239.55	237.48	16.5639	258.78	255.7
20.1194	28.25	20.1194	22.39	20.1194	20.7667		15.5779	297	15.5779	248	15.5779	292		16.5806	237.63	234.9	16.5806	239.49	237.44	16.5806	258.73	255.68
20.1393	28.1792	20.1393	21.81	20.1393	20.225		15.5946	234	15.5946	274	15.5946	256		16.5973	237.55	234.85	16.5973	239.44	237.4	16.5973	258.67	255.66
20.1591	28.0875	20.1591	21.63	20.1591	20.4667		15.6113	253	15.6113	231	15.6113	280		16.614	237.48	234.8	16.614	239.38	237.36	16.614	258.59	255.64
20.1789	28.5667	20.1789	20.97	20.1789	20.5417		15.628	280	15.628	232	15.628	262		16.6307	237.41	234.75	16.6307	239.33	237.32	16.6307	258.48	255.62
20.1988	28.2083	20.1988	21.23	20.1988	21.025		15.6448	278	15.6448	251	15.6448	268		16.6474	237.34	234.71	16.6474	239.28	237.28	16.6474	258.37	255.6
20.2186	27.8083	20.2186	21.42	20.2186	20.3625		15.6615	229	15.6615	269	15.6615	278		16.6641	237.28	234.66	16.6641	239.22	237.24	16.6641	258.27	255.58
20.2385	27.4958	20.2385	20.73	20.2385	20.6875		15.6782	260	15.6782	262	15.6782	262		16.6809	237.21	234.62	16.6809	239.17	237.2	16.6809	258.18	255.57
20.2583	28.4508	20.2583	20.33	20.2583	19.8607		15.6949	268	15.6949	236	15.6949	263		16.6976	237.14	234.58	16.6976	239.12	237.17	16.6976	258.11	255.55
20.2781	26.8033	20.2781	20.62	20.2781	20.5041		15.7116	240	15.7116	226	15.7116	288		16.7143	237.08	234.53	16.7143	239.07	237.13	16.7143	258.05	255.53
20.298	28.2336	20.298	20.54	20.298	20.3361		15.7283	252	15.7283	242	15.7283	282		16.731	237.02	234.49	16.731	239.02	237.1	16.731	257.99	255.52
20.3178	27.6639	20.3178	20.48	20.3178	20.0902		15.745	223	15.745	263	15.745	279		16.7477	236.96	234.45	16.7477	238.98	237.06	16.7477	257.95	255.5
20.3377	28.2172	20.3377	20.9	20.3377	20.0205		15.7617	263	15.7617	264	15.7617	248		16.7644	236.89	234.41	16.7644	238.93	237.03	16.7644	257.9	255.49
20.3575	28.4385	20.3575	21.04	20.3575	20.4057		15.7784	229	15.7784	213	15.7784	267		16.7811	236.84	234.37	16.7811	238.88	236.99	16.7811	257.87	255.47
20.3773	28.0806	20.3773	20.9	20.3773	20.9919		15.7951	229	15.7951	241	15.7951	279		16.7978	236.78	234.33	16.7978	238.84	236.96	16.7978	257.83	255.46
20.3972	27.9073	20.3972	20.68	20.3972	20.2863		15.8119	243	15.8119	280	15.8119	265		16.8145	236.72	234.29	16.8145	238.79	236.93	16.8145	257.8	255.45
20.417	27.5363	20.417	20.88	20.417	20.7944		15.8286	241	15.8286	234	15.8286	282		16.8313	236.66	234.25	16.8313	238.75	236.9	16.8313	257.77	255.44
20.4369	27.8629	20.4369	20.77	20.4369	20.5323		15.8453	261	15.8453	269	15.8453	268		16.848	236.61	234.21	16.848	238.71	236.86	16.848	257.74	255.42
20.4567	27.8024	20.4567	20.64	20.4567	20.875		15.862	260	15.862	242	15.862	271		16.8647	236.56	234.18	16.8647	238.67	236.83	16.8647	257.71	255.41
20.4765	27.75	20.4765	20.76	20.4765	20.5323		15.8787	225	15.8787	285	15.8787	260		16.8814	236.5	234.14	16.8814	238.63	236.8	16.8814	257.68	255.4
20.4964	28.8831	20.4964	21.19	20.4964	21.0081		15.8954	242	15.8954	252	15.8954	279		16.8981	236.45	234.1	16.8981	238.59	236.77	16.8981	257.66	255.39
20.5162	28.2298	20.5162	20.61	20.5162	21.0806		15.9121	254	15.9121	231	15.9121	259		16.9148	236.4	234.07	16.9148	238.55	236.74	16.9148	257.64	255.38
20.536	28.4315	20.536	20.73	20.536	20.6976		15.9288	231	15.9288	243	15.9288	269		16.9315	236.35	234.03	16.9315	238.51	236.72	16.9315	257.61	255.37
20.5559	27.9516	20.5559	21.56	20.5559	21.3669		15.9456	251	15.9456	229	15.9456	287		16.9482	236.3	234	16.9482	238.47	236.69	16.9482	257.59	255.37
20.5757	28.004	20.5757	20.9	20.5757	20.6371		15.9623	252	15.9623	236	15.9623	252		16.9649	236.26	233.97	16.9649	238.44	236.66	16.9649	257.57	255.36
20.5956	28.0484	20.5956	21.42	20.5956	21.9435		15.979	244	15.979	277	15.979	279		16.9816	236.21	233.93	16.9816	238.4	236.63	16.9816	257.55	255.35
20.6154	28.1935	20.6154	20.99	20.6154	21.2218		15.9957	241	15.9957	271	15.9957	287		16.9984	236.17	233.9	16.9984	238.37	236.61	16.9984	257.54	255.34
20.6352	28.0645	20.6352	20.95	20.6352	20.8065		16.0124	254	16.0124	257	16.0124	262		17.0151	236.12	233.87	17.0151	238.33	236.58	17.0151	257.52	255.34
20.6551	28.371	20.6551	21.53	20.6551	21.0605		16.0291	247	16.0291	207	16.0291	273		17.0318	236.08	233.84	17.0318	238.3	236.55	17.0318	257.51	255.33
20.6749	28.4637	20.6749	21.44	20.6749	21.0847		16.0458	241	16.0458	234	16.0458	284		17.0485	236.03	233.81	17.0485	238.27	236.53	17.0485	257.49	255.32
20.6948	28.0645	20.6948	21.8	20.6948	21.0645		16.0625	251	16.0625	248	16.0625	277		17.0652	235.99	233.78	17.0652	238.23	236.5	17.0652	257.48	255.32
20.7146	28.6976	20.7146	21.45	20.7146	20.8992		16.0792	254	16.0792	242	16.0792	278		17.0819	235.95	233.75	17.0819	238.2	236.48	17.0819	257.47	255.31
20.7344	28.5081	20.7344	21.04	20.7344	22.0363		16.096	269	16.096	261	16.096	302		17.0986	235.91	233.72	17.0986	238.17	236.46	17.0986	257.46	255.31
20.7543	27.9153	20.7543	22.08	20.7543	21.871		16.1127	231	16.1127	257	16.1127	274		17.1153	235.87	233.7	17.1153	238.14	236.43	17.1153	257.45	255.31
20.7741	29.5645	20.7741	21.63	20.7741	21.9395		16.1294	273	16.1294	249	16.1294	267		17.1321	235.84	233.67	17.1321	238.11	236.41	17.1321	257.44	255.3
20.794	28.5887	20.794	21.94	20.794	22.7419		16.1461	252	16.1461	236	16.1461	254		17.1488	235.8	233.64	17.1488	238.09	236.39	17.1488	257.43	255.3
20.8138	29.8992	20.8138	22.54	20.8138	23.3065		16.1628	226	16.1628	264	16.1628	281		17.1655	235.76	233.62	17.1655	238.06	236.37	17.1655	257.43	255.3
20.8336	29.875	20.8336	23.34	20.8336	23.0524		16.1795	240	16.1795	268	16.1795	302		17.1822	235.73	233.59	17.1822	238.03	236.35	17.1822	257.42	255.3
20.8535	30.1694	20.8535	24.2	20.8535	23.2339		16.1962	265	16.1962	236	16.1962	255		17.1989	235.69	233.57	17.1989	238.01	236.33	17.1989	257.42	255.3
20.8733	30.1492	20.8733	24.19	20.8733	23.254		16.2129	236	16.2129	267	16.2129	270		17.2156	235.66	233.55	17.2156	237.98	236.31	17.2156	257.42	255.3
20.8932	30.2419	20.8932	24.13	20.8932	22.9032		16.2296	231	16.2296	241	16.2296	284		17.2323	235.63	233.52	17.2323	237.96	236.29	17.2323	257.42	255.29
20.913	29.8226	20.913	23.68	20.913	22.5161		16.2464	264	16.2464	273	16.2464	233		17.249	235.6	233.5	17.249	237.93	236.27	17.249	257.43	255.29
20.9328	30.1613	20.9328	22.96	20.9328	22.4798		16.2631	244	16.2631	246	16.2631	301		17.2658	235.57	233.48	17.2658	237.91	236.25	17.2658	257.44	255.3
20.9527	29.9008	20.9527	23.02	20.9527	21.5198		16.2798	240	16.2798	229	16.2798	263		17.2825	235.54	233.46	17.2825	237.89	236.23	17.2825	257.45	255.3
20.9725	30.4802	20.9725	22.88	20.9725	22.004		16.2965	231	16.2965	237	16.2965	251		17.2992	235.51	233.44	17.2992	237.87	236.22	17.2992	257.46	255.3
20.9924	29.8968	20.9924	22.87	20.9924	22.1627		16.3132	238	16.3132	240	16.3132	256		17.3159	235.48	233.41	17.3159	237.84	236.2	17.3159	257.48	255.3
21.0122	30.7143	21.0122	22.52	21.0122	22.4921		16.3299	236	16.3299	237	16.3299	250		17.3326	235.45	233.4	17.3326	237.82	236.18	17.3326	257.5	255.3
21.032	30.8056	21.032	22.17	21.032	22.75		16.3466	242	16.3466	252	16.3466	271		17.3493	235.43	233.38	17.3493	237.8	236.17	17.3493	257.52	255.3
21.0519	30.5156	21.0519	22.44	21.0519	22.918		16.3633	246	16.3633	223	16.3633	267		17.366	235.4	233.36	17.366	237.79	236.15	17.366	257.56	255.31
21.0717	30.9805	21.0717	23	21.0717	22.1367		16.3801	251	16.3801	269	16.3801	268		17.3827	235.38	233.34	17.3827	237.77	236.14	17.3827	257.6	255.31
21.0915	31.668	21.0915	22.3	21.0915	22.5625		16.3968	252	16.3968	210	16.3968	289		17.3994	235.35	233.32	17.3994	237.75	236.12	17.3994	257.65	255.32
21.1114	31.0938	21.1114	23.45	21.1114	22.2344		16.4135	263	16.4135	253	16.4135	259		17.4162	235.33	233.31	17.4162	237.73	236.11	17.4162	257.71	255.32
21.1312	31.1016	21.1312	23.27	21.1312	22.8398		16.4302	260	16.4302	236	16.4302	277		17.4329	235.31	233.29	17.4329	237.72	236.1	17.4329	257.77	255.33
21.1511	30.3164	21.1511	22.48	21.1511	23.5156		16.4469	203	16.4469	255	16.4469	288		17.4496	235.28	233.27	17.4496	237.7	236.08	17.4496	257.86	255.33
21.1709	29.7539	21.1709	22.59	21.1709	22.582		16.4636	249	16.4636	275	16.4636	268		17.4663	235.26	233.26	17.4663	237.69	236.07	17.4663	257.96	255.34
21.1907	30.1719	21.1907	22.97	21.1907	22.9453		16.4803	224	16.4803	229	16.4803	269		17.483	235.24	233.24	17.483	237.67	236.06	17.483	258.07	255.34
21.2106	30.7266	21.2106	22.91	21.2106	22.5781		16.497	251	16.497	268	16.497	273		17.4997	235.22	233.23	17.4997	237.66	236.05	17.4997	258.22	255.35
21.2304	30.0703	21.2304	23.42	21.2304	22.4727		16.5137	254	16.5137	213	16.5137	255		17.5164	235.2	233.22	17.5164	237.64	236.04	17.5164	258.39	255.36
21.2503	30.5313	21.2503	22.45	21.2503	21.8555		16.5304	234	16.5304	221	16.5304	269		17.5331	235.19	233.2	17.5331	237.63	236.03	17.5331	258.6	255.36
21.2701	30.0078	21.2701	23.05	21.2701	22.5234		16.5472	240	16.5472	259	16.5472	282		17.5498	235.17	233.19	17.5498	237.62	236.02	17.5498	258.85	255.37
21.2899	29.9453	21.2899	22.57	21.2899	23.0703		16.5639	260	16.5639	253	16.5639	251		17.5665	235.15	233.18	17.5665	237.61	236.01	17.5665	259.15	255.38
21.3098	30	21.3098	22.58	21.3098	22.9922		16.5806	242	16.5806	229	16.5806	261		17.5833	235.14	233.17	17.5833	237.6	236	17.5833	259.48	255.39
21.3296	29.7383	21.3296	22.57	21.3296	22.4727		16.5973	243	16.5973	249	16.5973	265		17.6	235.12	233.16	17.6	237.59	235.99	17.6	259.82	255.4
21.3495	30.4258	21.3495	22.73	21.3495	22.25		16.614	218	16.614	238	16.614	257		17.6167	235.11	233.15	17.6167	237.58	235.98	17.6167	260.08	255.41
21.3693	29.3711	21.3693	22.97	21.3693	22.2734		16.6307	238	16.6307	242	16.6307	252		17.6334	235.1	233.14	17.6334	237.57	235.97	17.6334	260.18	255.42
21.3891	29.3438	21.3891	22.66	21.3891	21.8438		16.6474	276	16.6474	238	16.6474	264		17.6501	235.08	233.13	17.6501	237.56	235.97	17.6501	260.09	255.43
21.409	29.3633	21.409	22.44	21.409	21.9375		16.6641	267	16.6641	232	16.6641	264		17.6668	235.07	233.12	17.6668	237.55	235.96	17.6668	259.85	255.44
21.4288	29.5273	21.4288	22.61	21.4288	22.2734		16.6808	229	16.6808	244	16.6808	254		17.6835	235.06	233.11	17.6835	237.54	235.95	17.6835	259.55	255.45
21.4487	28.7422	21.4487	22.2	21.4487	21.7852		16.6976	236	16.6976	243	16.6976	282		17.7002	235.05	233.11	17.7002	237.54	235.95	17.7002	259.27	255.46
21.4685	29.0156	21.4685	22.3	21.4685	22.2969		16.7143	209	16.7143	261	16.7143	253		17.7169	235.04	233.1	17.7169	237.53	235.94	17.7169	259.09	255.47
21.4883	29.4297	21.4883	21.8	21.4883	21.7031		16.731	238	16.731	242	16.731	259		17.7337	235.03	233.09	17.7337	237.53	235.94	17.7337	259.06	255.48
21.5082	28.6211	21.5082	21.71	21.5082	21.1836		16.7477	239	16.7477	258	16.7477	269		17.7504	235.02	233.09	17.7504	237.52	235.93	17.7504	259.2	255.5
21.528	28.7852	21.528	21.54	21.528	21.0313		16.7644	244	16.7644	252	16.7644	246		17.7671	235.01	233.08	17.7671	237.52	235.93	17.7671	259.65	255.51
21.5479	29.1172	21.5479	21.37	21.5479	21.5273		16.7811	241	16.7811	256	16.7811	300		17.7838	235.01	233.08	17.7838	237.51	235.93	17.7838	260.05	255.52
21.5677	28.0938	21.5677	21.84	21.5677	21.6367		16.7978	227	16.7978	262	16.7978	259		17.8005	235	233.07	17.8005	237.51	235.92	17.8005	260.13	255.54
21.5875	28.4883	21.5875	21.79	21.5875	22.1758		16.8145	252	16.8145	219	16.8145	297		17.8172	235	233.07	17.8172	237.51	235.92	17.8172	259.64	255.55
21.6074	28.0977	21.6074	22.01	21.6074	21.2266		16.8313	266	16.8313	238	16.8313	251		17.8339	234.99	233.06	17.8339	237.51	235.92	17.8339	259.06	255.56
21.6272	28.1269	21.6272	21.9	21.6272	21.4692		16.848	213	16.848	232	16.848	266		17.8506	234.99	233.06	17.8506	237.51	235.92	17.8506	258.55	255.58
21.647	28.7192	21.647	21.53	21.647	21.6538		16.8647	206	16.8647	260	16.8647	263		17.8673	234.98	233.06	17.8673	237.51	235.91	17.8673	258.23	255.59
21.6669	27.6538	21.6669	21.12	21.6669	21.5		16.8814	209	16.8814	244	16.8814	243		17.8841	234.98	233.06	17.8841	237.51	235.91	17.8841	258.07	255.61
21.6867	28.2731	21.6867	21.38	21.6867	21.4154		16.8981	233	16.8981	254	16.8981	237		17.9008	234.98	233.06	17.9008	237.51	235.91	17.9008	258.08	255.62
21.7066	27.7808	21.7066	21.13	21.7066	21.1385		16.9148	238	16.9148	255	16.9148	280		17.9175	234.98	233.06	17.9175	237.51	235.91	17.9175	258.14	255.64
21.7264	27.5758	21.7264	21.28	21.7264	21.6174		16.9315	267	16.9315	235	16.9315	291		17.9342	234.98	233.06	17.9342	237.51	235.91	17.9342	258.23	255.66
21.7462	28.1515	21.7462	21.5	21.7462	21.2462		16.9482	227	16.9482	267	16.9482	256		17.9509	234.98	233.06	17.9509	237.51	235.91	17.9509	258.34	255.67
21.7661	27.3636	21.7661	21.21	21.7661	20.8409		16.9649	220	16.9649	235	16.9649	239		17.9676	234.98	233.06	17.9676	237.51	235.91	17.9676	258.48	255.69
21.7859	27.9697	21.7859	21.5	21.7859	21.3977		16.9816	221	16.9816	224	16.9816	269		17.9843	234.98	233.06	17.9843	237.52	235.92	17.9843	258.64	255.71
21.8058	27.7462	21.8058	21.17	21.8058	21.875		16.9984	264	16.9984	236	16.9984	263		18.001	234.98	233.06	18.001	237.52	235.92	18.001	258.83	255.73
21.8256	28.1515	21.8256	21.42	21.8256	22.2803		17.0151	247	17.0151	252	17.0151	275		18.0177	234.98	233.06	18.0177	237.52	235.92	18.0177	259.07	255.74
21.8454	27.5341	21.8454	22.2	21.8454	22.8371		17.0318	208	17.0318	230	17.0318	250		18.0345	234.98	233.06	18.0345	237.53	235.92	18.0345	259.38	255.76
21.8653	28.3636	21.8653	22.06	21.8653	23.3674		17.0485	219	17.0485	244	17.0485	252		18.0512	234.99	233.07	18.0512	237.53	235.93	18.0512	259.78	255.78
21.8851	28.5492	21.8851	23.59	21.8851	23.6288		17.0652	236	17.0652	215	17.0652	267		18.0679	234.99	233.07	18.0679	237.54	235.93	18.0679	260.25	255.8
21.905	29.2727	21.905	24.21	21.905	24.678		17.0819	239	17.0819	232	17.0819	247		18.0846	235	233.07	18.0846	237.55	235.93	18.0846	260.92	255.82
21.9248	28.5871	21.9248	25.05	21.9248	25.1515		17.0986	257	17.0986	242	17.0986	259		18.1013	235	233.08	18.1013	237.55	235.94	18.1013	261.81	255.84
21.9446	28.6098	21.9446	24.57	21.9446	25.053		17.1153	230	17.1153	257	17.1153	262		18.118	235.01	233.08	18.118	237.56	235.94	18.118	263.27	255.86
21.9645	28.8485	21.9645	24.05	21.9645	24.5227		17.132	260	17.132	283	17.132	260		18.1347	235.02	233.09	18.1347	237.57	235.95	18.1347	265	255.88
21.9843	28.8333	21.9843	23.55	21.9843	23.0417		17.1488	225	17.1488	250	17.1488	275		18.1514	235.02	233.1	18.1514	237.58	235.95	18.1514	266.19	255.9
22.0042	27.8788	22.0042	22.6	22.0042	23.0303		17.1655	240	17.1655	265	17.1655	271		18.1681	235.03	233.1	18.1681	237.59	235.96	18.1681	265.88	255.92
22.024	27.5909	22.024	21.89	22.024	22.1136		17.1822	216	17.1822	225	17.1822	257		18.1849	235.04	233.11	18.1849	237.6	235.97	18.1849	264.73	255.94
22.0438	27.4962	22.0438	21.57	22.0438	21.1856		17.1989	219	17.1989	223	17.1989	262		18.2016	235.05	233.12	18.2016	237.61	235.97	18.2016	263.33	255.96
22.0637	27.4545	22.0637	21.25	22.0637	20.7083		17.2156	240	17.2156	228	17.2156	259		18.2183	235.06	233.12	18.2183	237.62	235.98	18.2183	262.07	255.98
22.0835	27.0341	22.0835	20.42	22.0835	20.5379		17.2323	266	17.2323	234	17.2323	262		18.235	235.07	233.13	18.235	237.63	235.99	18.235	260.94	256.01
22.1034	26.6629	22.1034	20.3	22.1034	20.3371		17.249	255	17.249	256	17.249	283		18.2517	235.08	233.14	18.2517	237.64	236	18.2517	260.23	256.03
22.1232	27.1515	22.1232	20.12	22.1232	19.6326		17.2658	222	17.2658	236	17.2658	263		18.2684	235.09	233.15	18.2684	237.65	236	18.2684	259.72	256.05
22.143	26.9394	22.143	19.46	22.143	19.6894		17.2825	219	17.2825	238	17.2825	258		18.2851	235.11	233.16	18.2851	237.66	236.01	18.2851	259.33	256.07
22.1629	26.6364	22.1629	19.92	22.1629	19.9394		17.2992	222	17.2992	231	17.2992	249		18.3018	235.12	233.17	18.3018	237.68	236.02	18.3018	259.05	256.1
22.1827	26.5455	22.1827	19.85	22.1827	19.6591		17.3159	250	17.3159	215	17.3159	234		18.3186	235.13	233.18	18.3186	237.69	236.03	18.3186	258.86	256.12
22.2025	26.5	22.2025	19.42	22.2025	19.2386		17.3326	283	17.3326	227	17.3326	259		18.3353	235.15	233.19	18.3353	237.71	236.04	18.3353	258.74	256.14
22.2224	25.9205	22.2224	19.42	22.2224	19.2083		17.3493	235	17.3493	246	17.3493	259		18.352	235.16	233.2	18.352	237.72	236.05	18.352	258.66	256.17
22.2422	26.5568	22.2422	19.64	22.2422	19.7045		17.366	229	17.366	227	17.366	258		18.3687	235.18	233.21	18.3687	237.74	236.06	18.3687	258.61	256.19
22.2621	26.4205	22.2621	19.97	22.2621	19.6667		17.3827	235	17.3827	260	17.3827	276		18.3854	235.19	233.22	18.3854	237.75	236.07	18.3854	258.58	256.22
22.2819	26.0038	22.2819	19.75	22.2819	19.7841		17.3994	225	17.3994	225	17.3994	279		18.4021	235.21	233.24	18.4021	237.77	236.09	18.4021	258.56	256.24
22.3017	26.2652	22.3017	20.18	22.3017	20		17.4161	250	17.4161	239	17.4161	238		18.4188	235.23	233.25	18.4188	237.79	236.1	18.4188	258.56	256.27
22.3216	26.0682	22.3216	20	22.3216	19.2917		17.4329	226	17.4329	238	17.4329	232		18.4355	235.24	233.26	18.4355	237.8	236.11	18.4355	258.56	256.29
22.3414	26.4478	22.3414	19.52	22.3414	20.0597		17.4496	218	17.4496	231	17.4496	259		18.4523	235.26	233.28	18.4523	237.82	236.12	18.4523	258.57	256.32
22.3613	26.5224	22.3613	19.81	22.3613	19.153		17.4663	238	17.4663	237	17.4663	262		18.469	235.28	233.29	18.469	237.84	236.13	18.469	258.58	256.34
22.3811	25.6287	22.3811	19.52	22.3811	19.3529		17.483	270	17.483	235	17.483	276		18.4857	235.3	233.3	18.4857	237.86	236.15	18.4857	258.6	256.37
22.4009	26.0662	22.4009	19.33	22.4009	19.5515		17.4997	214	17.4997	232	17.4997	282		18.5024	235.32	233.32	18.5024	237.88	236.16	18.5024	258.62	256.4
22.4208	26.4081	22.4208	19.72	22.4208	19.2757		17.5164	223	17.5164	234	17.5164	233		18.5191	235.34	233.33	18.5191	237.9	236.17	18.5191	258.64	256.42
22.4406	25.7574	22.4406	19.08	22.4406	19.4007		17.5331	239	17.5331	242	17.5331	266		18.5358	235.36	233.35	18.5358	237.92	236.19	18.5358	258.66	256.45
22.4605	26.5037	22.4605	19.13	22.4605	19.2169		17.5498	239	17.5498	203	17.5498	259		18.5525	235.39	233.37	18.5525	237.94	236.2	18.5525	258.69	256.48
22.4803	25.614	22.4803	19.09	22.4803	19.3382		17.5665	235	17.5665	240	17.5665	278		18.5692	235.41	233.38	18.5692	237.96	236.22	18.5692	258.72	256.5
22.5001	25.2463	22.5001	19.27	22.5001	19.2721		17.5833	229	17.5833	220	17.5833	273		18.5859	235.43	233.4	18.5859	237.98	236.23	18.5859	258.75	256.53
22.52	25.7206	22.52	19.22	22.52	18.8088		17.6	214	17.6	228	17.6	276		18.6026	235.46	233.42	18.6026	238.01	236.25	18.6026	258.78	256.56
22.5398	25.5147	22.5398	19.04	22.5398	19		17.6167	250	17.6167	218	17.6167	234		18.6194	235.48	233.43	18.6194	238.03	236.27	18.6194	258.81	256.59
22.5597	26.0625	22.5597	19.51	22.5597	19.614		17.6334	231	17.6334	254	17.6334	250		18.6361	235.51	233.45	18.6361	238.05	236.28	18.6361	258.84	256.62
22.5795	25.5147	22.5795	18.68	22.5795	19.1397		17.6501	230	17.6501	227	17.6501	270		18.6528	235.53	233.47	18.6528	238.08	236.3	18.6528	258.88	256.64
22.5993	26.3456	22.5993	19.16	22.5993	19.1103		17.6668	229	17.6668	250	17.6668	247		18.6695	235.56	233.49	18.6695	238.1	236.32	18.6695	258.91	256.67
22.6192	26.0993	22.6192	19.26	22.6192	19.9301		17.6835	220	17.6835	236	17.6835	234		18.6862	235.58	233.51	18.6862	238.13	236.33	18.6862	258.95	256.7
22.639	26.5257	22.639	19.68	22.639	19.7353		17.7002	238	17.7002	223	17.7002	268		18.7029	235.61	233.53	18.7029	238.15	236.35	18.7029	258.99	256.73
22.6589	26.2132	22.6589	19.57	22.6589	19.1654		17.717	239	17.717	212	17.717	279		18.7196	235.64	233.55	18.7196	238.18	236.37	18.7196	259.02	256.76
22.6787	26.3162	22.6787	19.5	22.6787	19.6765		17.7337	202	17.7337	219	17.7337	258		18.7363	235.67	233.57	18.7363	238.21	236.39	18.7363	259.06	256.79
22.6985	26.761	22.6985	19.97	22.6985	20.1618		17.7504	232	17.7504	261	17.7504	253		18.753	235.7	233.59	18.753	238.23	236.4	18.753	259.1	256.82
22.7184	26.8897	22.7184	19.86	22.7184	20.4816		17.7671	239	17.7671	240	17.7671	257		18.7698	235.73	233.61	18.7698	238.26	236.42	18.7698	259.14	256.85
22.7382	28.1765	22.7382	20.02	22.7382	21.5331		17.7838	236	17.7838	238	17.7838	238		18.7865	235.76	233.63	18.7865	238.29	236.44	18.7865	259.18	256.88
22.758	29.3971	22.758	20.1	22.758	22.2243		17.8005	244	17.8005	253	17.8005	257		18.8032	235.79	233.65	18.8032	238.32	236.46	18.8032	259.22	256.91
22.7779	31.5809	22.7779	21.54	22.7779	22.8272		17.8172	221	17.8172	221	17.8172	246		18.8199	235.82	233.68	18.8199	238.35	236.48	18.8199	259.26	256.94
22.7977	36.1618	22.7977	24.56	22.7977	22.9559		17.8339	228	17.8339	254	17.8339	251		18.8366	235.85	233.7	18.8366	238.38	236.5	18.8366	259.3	256.97
22.8176	42.25	22.8176	26.53	22.8176	22.3824		17.8506	221	17.8506	230	17.8506	243		18.8533	235.89	233.72	18.8533	238.41	236.52	18.8533	259.35	257
22.8374	44.3566	22.8374	27.42	22.8374	21.6618		17.8673	242	17.8673	220	17.8673	258		18.87	235.92	233.74	18.87	238.44	236.54	18.87	259.39	257.04
22.8572	44.4118	22.8572	28.64	22.8572	21.2574		17.8841	240	17.8841	235	17.8841	280		18.8867	235.95	233.77	18.8867	238.47	236.57	18.8867	259.44	257.07
22.8771	41.1434	22.8771	25.12	22.8771	21.0074		17.9008	220	17.9008	249	17.9008	258		18.9035	235.99	233.79	18.9035	238.5	236.59	18.9035	259.48	257.1
22.8969	35.9301	22.8969	24.27	22.8969	19.9706		17.9175	250	17.9175	258	17.9175	265		18.9202	236.02	233.82	18.9202	238.54	236.61	18.9202	259.53	257.13
22.9168	32.9007	22.9168	23.35	22.9168	20.2537		17.9342	199	17.9342	248	17.9342	247		18.9369	236.06	233.84	18.9369	238.57	236.63	18.9369	259.57	257.16
22.9366	29.5846	22.9366	21.01	22.9366	19.5221		17.9509	231	17.9509	235	17.9509	262		18.9536	236.1	233.87	18.9536	238.6	236.65	18.9536	259.62	257.19
22.9564	27.0882	22.9564	20.2	22.9564	19.1434		17.9676	235	17.9676	276	17.9676	281		18.9703	236.13	233.89	18.9703	238.64	236.68	18.9703	259.67	257.23
22.9763	25.9963	22.9763	19.01	22.9763	19.4265		17.9843	253	17.9843	239	17.9843	266		18.987	236.17	233.92	18.987	238.67	236.7	18.987	259.72	257.26
22.9961	25.9338	22.9961	19.27	22.9961	20.0221		18.001	248	18.001	238	18.001	300		19.0037	236.21	233.94	19.0037	238.71	236.72	19.0037	259.77	257.29
23.016	26.3199	23.016	19.11	23.016	19.4743		18.0177	227	18.0177	225	18.0177	252		19.0204	236.25	233.97	19.0204	238.75	236.75	19.0204	259.82	257.33
23.0358	25.6176	23.0358	19.25	23.0358	19.4191		18.0345	255	18.0345	229	18.0345	249		19.0371	236.29	233.99	19.0371	238.78	236.77	19.0371	259.87	257.36
23.0556	25.0714	23.0556	19.44	23.0556	19.0357		18.0512	231	18.0512	248	18.0512	234		19.0538	236.33	234.02	19.0538	238.82	236.79	19.0538	259.92	257.39
23.0755	25.0536	23.0755	19.18	23.0755	18.9357		18.0679	192	18.0679	254	18.0679	246		19.0706	236.37	234.05	19.0706	238.86	236.82	19.0706	259.97	257.42
23.0953	24.8286	23.0953	19.05	23.0953	19.15		18.0846	253	18.0846	248	18.0846	269		19.0873	236.42	234.08	19.0873	238.9	236.84	19.0873	260.02	257.46
23.1152	25.7464	23.1152	18.49	23.1152	18.7357		18.1013	246	18.1013	222	18.1013	267		19.104	236.46	234.1	19.104	238.94	236.87	19.104	260.07	257.49
23.135	25.0714	23.135	19.26	23.135	19.2321		18.118	236	18.118	239	18.118	256		19.1207	236.5	234.13	19.1207	238.97	236.89	19.1207	260.13	257.53
23.1548	25.3107	23.1548	18.97	23.1548	18.8071		18.1347	210	18.1347	219	18.1347	251		19.1374	236.55	234.16	19.1374	239.02	236.92	19.1374	260.18	257.56
23.1747	25.05	23.1747	19.18	23.1747	19.0429		18.1514	239	18.1514	234	18.1514	260		19.1541	236.59	234.19	19.1541	239.06	236.94	19.1541	260.23	257.59
23.1945	24.9786	23.1945	19.34	23.1945	19.0786		18.1682	228	18.1682	242	18.1682	252		19.1708	236.64	234.22	19.1708	239.1	236.97	19.1708	260.29	257.63
23.2144	25.6464	23.2144	18.94	23.2144	18.9536		18.1849	223	18.1849	230	18.1849	240		19.1875	236.68	234.25	19.1875	239.14	237	19.1875	260.35	257.66
23.2342	25.4714	23.2342	18.49	23.2342	18.0321		18.2016	244	18.2016	235	18.2016	264		19.2042	236.73	234.28	19.2042	239.18	237.02	19.2042	260.41	257.7
23.254	25.4536	23.254	18.79	23.254	18.925		18.2183	227	18.2183	240	18.2183	274		19.221	236.78	234.31	19.221	239.23	237.05	19.221	260.46	257.73
23.2739	25.7607	23.2739	19.18	23.2739	19.0929		18.235	202	18.235	228	18.235	243		19.2377	236.83	234.34	19.2377	239.27	237.08	19.2377	260.52	257.77
23.2937	24.8714	23.2937	19.26	23.2937	19.0607		18.2517	240	18.2517	242	18.2517	278		19.2544	236.88	234.37	19.2544	239.32	237.11	19.2544	260.58	257.8
23.3135	24.9464	23.3135	18.68	23.3135	18.7857		18.2684	242	18.2684	246	18.2684	249		19.2711	236.93	234.4	19.2711	239.36	237.13	19.2711	260.64	257.84
23.3334	25.0893	23.3334	18.78	23.3334	18.9321		18.2851	233	18.2851	242	18.2851	268		19.2878	236.98	234.43	19.2878	239.41	237.16	19.2878	260.71	257.87
23.3532	25.0607	23.3532	18.69	23.3532	19		18.3018	241	18.3018	204	18.3018	246		19.3045	237.03	234.46	19.3045	239.46	237.19	19.3045	260.77	257.91
23.3731	25.2	23.3731	18.87	23.3731	18.7821		18.3186	196	18.3186	214	18.3186	284		19.3212	237.09	234.49	19.3212	239.5	237.22	19.3212	260.83	257.95
23.3929	25.1393	23.3929	18.93	23.3929	18.7036		18.3353	231	18.3353	240	18.3353	268		19.3379	237.14	234.53	19.3379	239.55	237.25	19.3379	260.9	257.98
23.4127	25.3357	23.4127	18.61	23.4127	18.4179		18.352	197	18.352	269	18.352	241		19.3546	237.2	234.56	19.3546	239.6	237.28	19.3546	260.96	258.02
23.4326	25.7714	23.4326	18.68	23.4326	18.5536		18.3687	233	18.3687	243	18.3687	253		19.3714	237.25	234.59	19.3714	239.65	237.3	19.3714	261.03	258.05
23.4524	25.9036	23.4524	18.75	23.4524	18.7786		18.3854	246	18.3854	230	18.3854	234		19.3881	237.31	234.62	19.3881	239.7	237.33	19.3881	261.1	258.09
23.4723	25.3571	23.4723	19.14	23.4723	18.3714		18.4021	215	18.4021	273	18.4021	214		19.4048	237.37	234.66	19.4048	239.75	237.36	19.4048	261.17	258.13
23.4921	25.35	23.4921	19.23	23.4921	19.2643		18.4188	226	18.4188	246	18.4188	269		19.4215	237.42	234.69	19.4215	239.8	237.39	19.4215	261.23	258.16
23.5119	25.4214	23.5119	19.27	23.5119	19.325		18.4355	240	18.4355	240	18.4355	254		19.4382	237.48	234.72	19.4382	239.86	237.42	19.4382	261.31	258.2
23.5318	25.8786	23.5318	19.38	23.5318	18.8143		18.4522	256	18.4522	192	18.4522	250		19.4549	237.54	234.76	19.4549	239.91	237.45	19.4549	261.38	258.24
23.5516	26.0071	23.5516	19.3	23.5516	18.9714		18.469	251	18.469	211	18.469	243		19.4716	237.61	234.79	19.4716	239.97	237.49	19.4716	261.45	258.27
23.5715	26.2643	23.5715	19.64	23.5715	19.6643		18.4857	236	18.4857	231	18.4857	252		19.4883	237.67	234.83	19.4883	240.02	237.52	19.4883	261.53	258.31
23.5913	26.275	23.5913	19.23	23.5913	19.4357		18.5024	235	18.5024	235	18.5024	253		19.5051	237.73	234.86	19.5051	240.08	237.55	19.5051	261.61	258.35
23.6111	25.3036	23.6111	19.18	23.6111	19.6536		18.5191	237	18.5191	241	18.5191	261		19.5218	237.8	234.9	19.5218	240.14	237.58	19.5218	261.69	258.38
23.631	25.9643	23.631	19.68	23.631	20.0929		18.5358	214	18.5358	221	18.5358	251		19.5385	237.87	234.93	19.5385	240.2	237.61	19.5385	261.77	258.42
23.6508	26.2821	23.6508	19.59	23.6508	19.7107		18.5525	230	18.5525	225	18.5525	267		19.5552	237.94	234.97	19.5552	240.26	237.64	19.5552	261.85	258.46
23.6707	26.1464	23.6707	19.98	23.6707	19.825		18.5692	257	18.5692	221	18.5692	253		19.5719	238.01	235	19.5719	240.32	237.68	19.5719	261.93	258.5
23.6905	26.4	23.6905	20.24	23.6905	19.425		18.5859	249	18.5859	242	18.5859	276		19.5886	238.08	235.04	19.5886	240.38	237.71	19.5886	262.02	258.54
23.7103	26.6536	23.7103	20.56	23.7103	19.0929		18.6027	226	18.6027	233	18.6027	238		19.6053	238.15	235.07	19.6053	240.45	237.74	19.6053	262.11	258.57
23.7302	27.2077	23.7302	21.37	23.7302	19.6937		18.6194	227	18.6194	266	18.6194	250		19.622	238.23	235.11	19.622	240.51	237.77	19.622	262.2	258.61
23.75	26.8611	23.75	21.35	23.75	19.3854		18.6361	211	18.6361	196	18.6361	242		19.6388	238.3	235.15	19.6388	240.58	237.81	19.6388	262.29	258.65
23.7699	28.5139	23.7699	20.99	23.7699	19.2951		18.6528	276	18.6528	267	18.6528	252		19.6555	238.38	235.18	19.6555	240.65	237.84	19.6555	262.39	258.69
23.7897	33.309	23.7897	20.89	23.7897	19.1667		18.6695	226	18.6695	259	18.6695	257		19.6722	238.46	235.22	19.6722	240.72	237.87	19.6722	262.49	258.73
23.8095	37.191	23.8095	21.78	23.8095	19.9201		18.6862	240	18.6862	243	18.6862	261		19.6889	238.55	235.26	19.6889	240.79	237.91	19.6889	262.59	258.76
23.8294	38.7465	23.8294	21.71	23.8294	20.4028		18.7029	271	18.7029	221	18.7029	232		19.7056	238.63	235.3	19.7056	240.86	237.94	19.7056	262.69	258.8
23.8492	38.6597	23.8492	22.07	23.8492	20.6736		18.7196	222	18.7196	230	18.7196	251		19.7223	238.72	235.33	19.7223	240.93	237.98	19.7223	262.8	258.84
23.869	36.5486	23.869	21.28	23.869	21.4097		18.7363	267	18.7363	234	18.7363	257		19.739	238.81	235.37	19.739	241.01	238.01	19.739	262.91	258.88
23.8889	33.0174	23.8889	20.66	23.8889	21.3576		18.7531	267	18.7531	232	18.7531	252		19.7557	238.91	235.41	19.7557	241.09	238.04	19.7557	263.03	258.92
23.9087	31.4375	23.9087	20.3	23.9087	20.2743		18.7698	254	18.7698	234	18.7698	263		19.7724	239.01	235.45	19.7724	241.17	238.08	19.7724	263.15	258.96
23.9286	28.9063	23.9286	19.64	23.9286	20.309		18.7865	251	18.7865	209	18.7865	287		19.7891	239.11	235.49	19.7891	241.25	238.11	19.7891	263.28	259
23.9484	26.9826	23.9484	20.01	23.9484	19.7917		18.8032	247	18.8032	220	18.8032	237		19.8059	239.22	235.53	19.8059	241.34	238.15	19.8059	263.41	259.03
23.9682	26.6944	23.9682	19.25	23.9682	19.316		18.8199	195	18.8199	225	18.8199	238		19.8226	239.34	235.57	19.8226	241.43	238.19	19.8226	263.55	259.07
23.9881	26.684	23.9881	19.67	23.9881	19.5347		18.8366	251	18.8366	207	18.8366	249		19.8393	239.47	235.61	19.8393	241.53	238.22	19.8393	263.7	259.11
24.0079	26.691	24.0079	19.48	24.0079	18.9861		18.8533	224	18.8533	240	18.8533	257		19.856	239.6	235.65	19.856	241.63	238.26	19.856	263.86	259.15
24.0278	27.0625	24.0278	19.12	24.0278	19.2813		18.87	216	18.87	215	18.87	264		19.8727	239.74	235.69	19.8727	241.74	238.29	19.8727	264.03	259.19
24.0476	27.4549	24.0476	19.62	24.0476	19.2882		18.8867	220	18.8867	231	18.8867	248		19.8894	239.9	235.73	19.8894	241.86	238.33	19.8894	264.21	259.23
24.0674	27.1875	24.0674	20.09	24.0674	19.6042		18.9034	239	18.9034	244	18.9034	283		19.9061	240.06	235.77	19.9061	241.98	238.37	19.9061	264.4	259.27
24.0873	28.1146	24.0873	20.08	24.0873	19.6597		18.9202	237	18.9202	214	18.9202	249		19.9228	240.25	235.81	19.9228	242.12	238.4	19.9228	264.61	259.31
24.1071	28.125	24.1071	20.1	24.1071	20.0035		18.9369	225	18.9369	258	18.9369	273		19.9395	240.45	235.85	19.9395	242.26	238.44	19.9395	264.85	259.35
24.127	28.6493	24.127	20.34	24.127	20.1736		18.9536	202	18.9536	249	18.9536	250		19.9563	240.69	235.89	19.9563	242.42	238.48	19.9563	265.11	259.39
24.1468	29.4132	24.1468	20.08	24.1468	19.816		18.9703	227	18.9703	231	18.9703	252		19.973	240.97	235.93	19.973	242.6	238.51	19.973	265.41	259.43
24.1666	30.691	24.1666	20.14	24.1666	20.6146		18.987	227	18.987	214	18.987	243		19.9897	241.3	235.97	19.9897	242.81	238.55	19.9897	265.78	259.47
24.1865	32.0208	24.1865	20.65	24.1865	21.0208		19.0037	240	19.0037	221	19.0037	271		20.0064	241.73	236.01	20.0064	243.05	238.59	20.0064	266.24	259.51
24.2063	32.6042	24.2063	20.91	24.2063	20.8368		19.0204	229	19.0204	254	19.0204	262		20.0231	242.28	236.06	20.0231	243.36	238.63	20.0231	266.88	259.55
24.2262	33.3681	24.2262	21.79	24.2262	21.5694		19.0371	221	19.0371	242	19.0371	239		20.0398	242.95	236.1	20.0398	243.76	238.66	20.0398	267.46	259.59
24.246	34.0174	24.246	21.98	24.246	21.8785		19.0539	229	19.0539	226	19.0539	274		20.0565	243.47	236.14	20.0565	244.35	238.7	20.0565	267.77	259.63
24.2658	35.2535	24.2658	22.17	24.2658	22.4583		19.0706	215	19.0706	229	19.0706	270		20.0732	243.63	236.18	20.0732	244.99	238.74	20.0732	267.76	259.67
24.2857	35.8854	24.2857	23.61	24.2857	23.4271		19.0873	234	19.0873	231	19.0873	259		20.09	243.46	236.22	20.09	245.38	238.78	20.09	267.7	259.71
24.3055	37.5035	24.3055	24.35	24.3055	23.8542		19.104	233	19.104	221	19.104	235		20.1067	243.27	236.27	20.1067	245.32	238.82	20.1067	267.77	259.75
24.3254	37.6215	24.3254	24.7	24.3254	24.1632		19.1207	252	19.1207	236	19.1207	239		20.1234	243.16	236.31	20.1234	245.09	238.86	20.1234	267.92	259.79
24.3452	38.3924	24.3452	25.72	24.3452	24.7604		19.1374	222	19.1374	249	19.1374	270		20.1401	243.16	236.35	20.1401	244.9	238.9	20.1401	268.22	259.83
24.365	39.2951	24.365	25.92	24.365	25.7708		19.1541	209	19.1541	253	19.1541	268		20.1568	243.33	236.4	20.1568	244.82	238.93	20.1568	268.72	259.87
24.3849	39.6027	24.3849	26.61	24.3849	26.4349		19.1708	225	19.1708	247	19.1708	252		20.1735	243.7	236.44	20.1735	244.88	238.97	20.1735	269.32	259.91
24.4047	40.2432	24.4047	26.58	24.4047	26.887		19.1875	235	19.1875	229	19.1875	242		20.1902	244.21	236.48	20.1902	245.16	239.01	20.1902	270.03	259.95
24.4246	40.25	24.4246	27.09	24.4246	27.0719		19.2042	252	19.2042	237	19.2042	242		20.2069	244.83	236.53	20.2069	245.6	239.05	20.2069	270.95	259.99
24.4444	40.6712	24.4444	27.82	24.4444	27.911		19.221	237	19.221	225	19.221	273		20.2236	245.62	236.57	20.2236	246.18	239.09	20.2236	272.18	260.03
24.4642	41.3919	24.4642	26.86	24.4642	27.625		19.2377	254	19.2377	228	19.2377	247		20.2403	246.66	236.61	20.2403	247	239.13	20.2403	273.82	260.07
24.4841	41.3412	24.4841	28.02	24.4841	27.8277		19.2544	235	19.2544	216	19.2544	254		20.2571	248.07	236.66	20.2571	248.17	239.17	20.2571	275.19	260.11
24.5039	42.0676	24.5039	27.9	24.5039	28.7061		19.2711	209	19.2711	242	19.2711	233		20.2738	249.73	236.7	20.2738	249.76	239.21	20.2738	275.69	260.15
24.5237	43.0439	24.5237	28.02	24.5237	28.2027		19.2878	256	19.2878	239	19.2878	273		20.2905	250.93	236.75	20.2905	250.93	239.25	20.2905	275.49	260.19
24.5436	43.5777	24.5436	28.21	24.5436	28.8041		19.3045	261	19.3045	232	19.3045	258		20.3072	251.07	236.79	20.3072	250.96	239.3	20.3072	275.31	260.23
24.5634	43.6791	24.5634	27.84	24.5634	29.2534		19.3212	260	19.3212	237	19.3212	284		20.3239	250.42	236.84	20.3239	250.09	239.34	20.3239	275.38	260.27
24.5833	42.8851	24.5833	28.3	24.5833	29.0642		19.3379	235	19.3379	232	19.3379	284		20.3406	249.69	236.88	20.3406	249.18	239.38	20.3406	275.6	260.31
24.6031	42.4899	24.6031	28.38	24.6031	29.1216		19.3546	227	19.3546	231	19.3546	270		20.3573	249.14	236.93	20.3573	248.51	239.42	20.3573	276.16	260.35
24.6229	43.0236	24.6229	28.29	24.6229	28.4426		19.3714	243	19.3714	226	19.3714	274		20.374	248.85	236.97	20.374	248.03	239.46	20.374	277.11	260.39
24.6428	41.5068	24.6428	28.65	24.6428	28.223		19.3881	231	19.3881	222	19.3881	259		20.3907	248.96	237.02	20.3907	247.92	239.5	20.3907	278.22	260.43
24.6626	41.4628	24.6626	28.14	24.6626	27.9054		19.4048	215	19.4048	258	19.4048	279		20.4075	249.44	237.07	20.4075	248.2	239.54	20.4075	279.44	260.47
24.6825	40.3919	24.6825	27.37	24.6825	27.4426		19.4215	231	19.4215	242	19.4215	264		20.4242	250.11	237.11	20.4242	248.62	239.58	20.4242	280.79	260.52
24.7023	39.5068	24.7023	27.39	24.7023	27.2297		19.4382	225	19.4382	278	19.4382	273		20.4409	250.89	237.16	20.4409	249.11	239.63	20.4409	282.25	260.56
24.7221	38.7061	24.7221	26.78	24.7221	26.4899		19.4549	213	19.4549	239	19.4549	277		20.4576	251.74	237.2	20.4576	249.65	239.67	20.4576	283.81	260.6
24.742	37.777	24.742	26.08	24.742	26.5507		19.4716	235	19.4716	237	19.4716	267		20.4743	252.67	237.25	20.4743	250.23	239.71	20.4743	285.47	260.64
24.7618	37.6959	24.7618	25.9	24.7618	26.1318		19.4883	229	19.4883	242	19.4883	297		20.491	253.66	237.3	20.491	250.87	239.75	20.491	287.23	260.68
24.7817	36.848	24.7817	26.07	24.7817	25.6892		19.5051	225	19.5051	233	19.5051	254		20.5077	254.71	237.34	20.5077	251.56	239.79	20.5077	289.07	260.72
24.8015	36.0743	24.8015	25.66	24.8015	26.1284		19.5218	236	19.5218	268	19.5218	258		20.5244	255.81	237.39	20.5244	252.3	239.84	20.5244	291	260.76
24.8213	35.2399	24.8213	25	24.8213	25.9291		19.5385	249	19.5385	214	19.5385	266		20.5412	256.96	237.44	20.5412	253.09	239.88	20.5412	292.98	260.8
24.8412	34.5946	24.8412	25.08	24.8412	25.2872		19.5552	229	19.5552	242	19.5552	254		20.5579	258.14	237.48	20.5579	253.93	239.92	20.5579	295	260.84
24.861	33.902	24.861	25.29	24.861	25.2534		19.5719	240	19.5719	248	19.5719	258		20.5746	259.33	237.53	20.5746	254.83	239.97	20.5746	297.04	260.88
24.8809	33.8581	24.8809	24.55	24.8809	25.2196		19.5886	225	19.5886	249	19.5886	284		20.5913	260.53	237.58	20.5913	255.78	240.01	20.5913	299.05	260.92
24.9007	32.8615	24.9007	24.44	24.9007	25.0439		19.6053	230	19.6053	218	19.6053	252		20.608	261.71	237.62	20.608	256.77	240.05	20.608	301.02	260.96
24.9205	31.9696	24.9205	23.83	24.9205	23.7534		19.622	250	19.622	220	19.622	287		20.6247	262.85	237.67	20.6247	257.81	240.1	20.6247	302.92	261
24.9404	32.1385	24.9404	23.85	24.9404	23.1655		19.6388	246	19.6388	215	19.6388	254		20.6414	263.93	237.72	20.6414	258.88	240.14	20.6414	304.64	261.05
24.9602	31.9662	24.9602	24.19	24.9602	23.5743		19.6555	225	19.6555	256	19.6555	254		20.6581	264.92	237.77	20.6581	259.97	240.18	20.6581	306.1	261.09
24.9801	31.402	24.9801	23.03	24.9801	23.2264		19.6722	246	19.6722	241	19.6722	268		20.6748	265.8	237.82	20.6748	261.08	240.23	20.6748	307.24	261.13
24.9999	31.4392	24.9999	23.32	24.9999	23.3074		19.6889	249	19.6889	236	19.6889	282		20.6916	266.54	237.86	20.6916	262.18	240.27	20.6916	308.09	261.17
25.0197	31.2736	25.0197	23.26	25.0197	22.5811		19.7056	227	19.7056	236	19.7056	291		20.7083	267.14	237.91	20.7083	263.26	240.31	20.7083	308.65	261.21
25.0396	30.5811	25.0396	22.62	25.0396	22.1115		19.7223	243	19.7223	225	19.7223	268		20.725	267.56	237.96	20.725	264.3	240.36	20.725	308.9	261.25
25.0594	30.9033	25.0594	23	25.0594	21.81		19.739	255	19.739	252	19.739	255		20.7417	267.83	238.01	20.7417	265.28	240.4	20.7417	308.83	261.29
25.0792	30.7133	25.0792	22.77	25.0792	22.14		19.7557	240	19.7557	225	19.7557	279		20.7584	267.92	238.06	20.7584	266.19	240.45	20.7584	308.48	261.33
25.0991	30.2633	25.0991	22.88	25.0991	21.77		19.7724	214	19.7724	230	19.7724	279		20.7751	267.88	238.1	20.7751	266.97	240.49	20.7751	307.92	261.37
25.1189	29.65	25.1189	22.97	25.1189	22.1467		19.7891	257	19.7891	233	19.7891	302		20.7918	267.69	238.15	20.7918	267.68	240.53	20.7918	307.03	261.41
25.1388	29.2167	25.1388	22.1	25.1388	21.7167		19.8059	221	19.8059	255	19.8059	271		20.8085	267.39	238.2	20.8085	268.29	240.58	20.8085	305.93	261.45
25.1586	29.0267	25.1586	21.72	25.1586	21.3667		19.8226	248	19.8226	240	19.8226	243		20.8253	267.02	238.25	20.8253	268.79	240.62	20.8253	304.66	261.49
25.1784	28.1842	25.1784	21.09	25.1784	20.6316		19.8393	234	19.8393	238	19.8393	249		20.842	266.61	238.3	20.842	269.17	240.67	20.842	303.28	261.54
25.1983	27.2533	25.1983	21.23	25.1983	20.2993		19.856	246	19.856	244	19.856	280		20.8587	266.18	238.35	20.8587	269.44	240.71	20.8587	301.84	261.58
25.2181	26.5625	25.2181	20.09	25.2181	20.1645		19.8727	240	19.8727	220	19.8727	274		20.8754	265.79	238.4	20.8754	269.62	240.76	20.8754	300.4	261.62
25.238	27.7401	25.238	20.42	25.238	19.8059		19.8894	232	19.8894	274	19.8894	244		20.8921	265.53	238.45	20.8921	269.75	240.8	20.8921	299.08	261.66
25.2578	27.2697	25.2578	19.71	25.2578	19.5428		19.9061	232	19.9061	236	19.9061	279		20.9088	265.46	238.5	20.9088	269.93	240.85	20.9088	297.93	261.7
25.2776	27.4605	25.2776	19.25	25.2776	19.0625		19.9228	239	19.9228	246	19.9228	273		20.9255	265.65	238.55	20.9255	270.22	240.89	20.9255	296.97	261.74
25.2975	27.7566	25.2975	19.76	25.2975	19.3717		19.9396	253	19.9396	251	19.9396	284		20.9422	266.2	238.6	20.9422	270.62	240.94	20.9422	296.4	261.78
25.3173	27.7171	25.3173	19.41	25.3173	19.2368		19.9563	258	19.9563	233	19.9563	284		20.9589	267.41	238.65	20.9589	271.41	240.99	20.9589	296.43	261.82
25.3372	28.7961	25.3372	19.6	25.3372	19.0033		19.973	268	19.973	238	19.973	285		20.9756	269.54	238.7	20.9756	272.85	241.03	20.9756	297.56	261.86
25.357	29.7303	25.357	20.13	25.357	19.5658		19.9897	254	19.9897	247	19.9897	287		20.9924	272.86	238.74	20.9924	275.6	241.08	20.9924	299.68	261.9
25.3768	30.1513	25.3768	20.47	25.3768	19.9408		20.0064	236	20.0064	257	20.0064	267		21.0091	275.69	238.79	21.0091	279.16	241.12	21.0091	300.66	261.94
25.3967	30.5954	25.3967	20.11	25.3967	20.0493		20.0231	243	20.0231	214	20.0231	295		21.0258	275.92	238.84	21.0258	281	241.17	21.0258	298.69	261.98
25.4165	29.8322	25.4165	20.19	25.4165	19.648		20.0398	239	20.0398	254	20.0398	266		21.0425	273.01	238.89	21.0425	279.08	241.21	21.0425	295.07	262.02
25.4364	28.8257	25.4364	20.18	25.4364	19.8882		20.0565	223	20.0565	257	20.0565	294		21.0592	269.14	238.95	21.0592	275.22	241.26	21.0592	291.75	262.06
25.4562	27.7039	25.4562	19.79	25.4562	19.6447		20.0732	249	20.0732	230	20.0732	264		21.0759	265.63	239	21.0759	271.63	241.31	21.0759	289.06	262.1
25.476	27.2697	25.476	20.4	25.476	19.125		20.09	221	20.09	262	20.09	261		21.0926	262.62	239.05	21.0926	268.68	241.35	21.0926	286.76	262.14
25.4959	26.9704	25.4959	21.86	25.4959	19.4112		20.1067	255	20.1067	249	20.1067	308		21.1093	260.45	239.1	21.1093	266.26	241.4	21.1093	285.39	262.18
25.5157	27.2829	25.5157	21.91	25.5157	18.5493		20.1234	271	20.1234	242	20.1234	259		21.1261	259.5	239.15	21.1261	265.02	241.45	21.1261	285.01	262.23
25.5356	26.1118	25.5356	21.91	25.5356	18.6908		20.1401	239	20.1401	252	20.1401	300		21.1428	259.32	239.2	21.1428	264.92	241.49	21.1428	284.94	262.27
25.5554	26.0757	25.5554	21.31	25.5554	19.1151		20.1568	265	20.1568	226	20.1568	267		21.1595	259.47	239.25	21.1595	265.21	241.54	21.1595	285.05	262.31
25.5752	26.3618	25.5752	20.77	25.5752	19.1217		20.1735	234	20.1735	266	20.1735	287		21.1762	259.82	239.3	21.1762	265.71	241.58	21.1762	285.29	262.35
25.5951	25.4868	25.5951	20.04	25.5951	18.5132		20.1902	238	20.1902	231	20.1902	279		21.1929	260.32	239.35	21.1929	266.38	241.63	21.1929	285.67	262.39
25.6149	25.3487	25.6149	19.3	25.6149	18.227		20.2069	261	20.2069	247	20.2069	274		21.2096	260.94	239.4	21.2096	267.21	241.68	21.2096	286.17	262.43
25.6347	24.7533	25.6347	18.88	25.6347	18.3289		20.2236	238	20.2236	258	20.2236	309		21.2263	261.69	239.45	21.2263	268.21	241.73	21.2263	286.8	262.47
25.6546	25.2434	25.6546	18.62	25.6546	17.8454		20.2403	241	20.2403	258	20.2403	289		21.243	262.55	239.5	21.243	269.36	241.77	21.243	287.56	262.51
25.6744	24.2796	25.6744	18.17	25.6744	17.9079		20.2571	276	20.2571	265	20.2571	300		21.2597	263.54	239.55	21.2597	270.68	241.82	21.2597	288.45	262.55
25.6943	24.5658	25.6943	18.3	25.6943	18.2599		20.2738	233	20.2738	240	20.2738	269		21.2764	264.66	239.6	21.2764	272.17	241.87	21.2764	289.47	262.59
25.7141	24.25	25.7141	18.75	25.7141	18.3849		20.2905	278	20.2905	277	20.2905	294		21.2932	265.92	239.65	21.2932	273.85	241.91	21.2932	290.64	262.63
25.7339	24.776	25.7339	18.44	25.7339	18.4188		20.3072	249	20.3072	259	20.3072	265		21.3099	267.31	239.71	21.3099	275.72	241.96	21.3099	291.96	262.67
25.7538	24.5649	25.7538	18.16	25.7538	17.9838		20.3239	248	20.3239	263	20.3239	298		21.3266	268.87	239.76	21.3266	277.78	242.01	21.3266	293.43	262.71
25.7736	24.6558	25.7736	18	25.7736	17.6818		20.3406	253	20.3406	230	20.3406	293		21.3433	270.58	239.81	21.3433	280.06	242.05	21.3433	295.07	262.75
25.7935	24.1558	25.7935	18.02	25.7935	17.6071		20.3573	234	20.3573	276	20.3573	295		21.36	272.47	239.86	21.36	282.55	242.1	21.36	296.86	262.79
25.8133	24.3766	25.8133	17.91	25.8133	17.9221		20.374	261	20.374	264	20.374	273		21.3767	274.55	239.91	21.3767	285.25	242.15	21.3767	298.83	262.83
25.8331	23.8344	25.8331	17.92	25.8331	17.9383		20.3908	226	20.3908	246	20.3908	308		21.3934	276.83	239.96	21.3934	288.18	242.2	21.3934	300.98	262.86
25.853	24.2208	25.853	17.88	25.853	17.987		20.4075	278	20.4075	269	20.4075	262		21.4101	279.31	240.01	21.4101	291.33	242.24	21.4101	303.3	262.9
25.8728	23.6538	25.8728	17.52	25.8728	17.9583		20.4242	259	20.4242	244	20.4242	264		21.4268	282.02	240.07	21.4268	294.7	242.29	21.4268	305.79	262.94
25.8927	24.4968	25.8927	17.59	25.8927	17.9679		20.4409	261	20.4409	252	20.4409	282		21.4436	284.97	240.12	21.4436	298.27	242.34	21.4436	308.46	262.98
25.9125	24.3622	25.9125	17.57	25.9125	17.9167		20.4576	280	20.4576	278	20.4576	279		21.4603	288.16	240.17	21.4603	302.03	242.39	21.4603	311.28	263.02
25.9323	23.7404	25.9323	17.74	25.9323	17.7051		20.4743	267	20.4743	241	20.4743	267		21.477	291.25	240.22	21.477	305.63	242.44	21.477	313.99	263.06
25.9522	24.2212	25.9522	17.6	25.9522	18.0417		20.491	226	20.491	235	20.491	295		21.4937	294.91	240.27	21.4937	309.67	242.48	21.4937	317.08	263.1
25.972	23.8205	25.972	17.67	25.972	17.9167		20.5077	261	20.5077	267	20.5077	259		21.5104	298.82	240.32	21.5104	313.8	242.53	21.5104	320.26	263.14
25.9919	24.2212	25.9919	17.6	25.9919	18.0032		20.5244	268	20.5244	234	20.5244	307		21.5271	302.96	240.38	21.5271	317.96	242.58	21.5271	323.51	263.18
26.0117	24.1987	26.0117	17.86	26.0117	17.6891		20.5411	258	20.5411	234	20.5411	284		21.5438	307.35	240.43	21.5438	322.08	242.63	21.5438	326.79	263.22
26.0315	24.1538	26.0315	17.87	26.0315	17.4327		20.5579	263	20.5579	253	20.5579	259		21.5605	311.94	240.48	21.5605	326.1	242.67	21.5605	330.05	263.26
26.0514	23.8686	26.0514	18.25	26.0514	17.75		20.5746	253	20.5746	261	20.5746	311		21.5773	316.71	240.53	21.5773	329.94	242.72	21.5773	333.23	263.3
26.0712	24.234	26.0712	17.53	26.0712	18.1955		20.5913	257	20.5913	263	20.5913	275		21.594	321.67	240.58	21.594	333.53	242.77	21.594	336.34	263.34
26.0911	23.9135	26.0911	17.62	26.0911	17.734		20.608	267	20.608	290	20.608	285		21.6107	326.81	240.63	21.6107	336.8	242.82	21.6107	339.33	263.37
26.1109	24.2019	26.1109	17.81	26.1109	18.1282		20.6247	261	20.6247	270	20.6247	294		21.6274	332.13	240.69	21.6274	339.74	242.87	21.6274	342.33	263.41
26.1307	24.4199	26.1307	18.49	26.1307	18.4551		20.6414	292	20.6414	239	20.6414	274		21.6441	337.31	240.74	21.6441	342.36	242.92	21.6441	344.94	263.45
26.1506	23.7244	26.1506	17.93	26.1506	18.8622		20.6581	280	20.6581	268	20.6581	296		21.6608	341.8	240.79	21.6608	344.66	242.96	21.6608	346.74	263.49
26.1704	24.109	26.1704	18.11	26.1704	18.8686		20.6748	267	20.6748	304	20.6748	277		21.6775	345.27	240.84	21.6775	346.07	243.01	21.6775	347.47	263.53
26.1902	24.7917	26.1902	18.26	26.1902	17.9583		20.6916	264	20.6916	254	20.6916	288		21.6942	348	240.89	21.6942	346.12	243.06	21.6942	347.67	263.57
26.2101	24.9231	26.2101	18.21	26.2101	18.4712		20.7083	279	20.7083	258	20.7083	335		21.7109	350.26	240.95	21.7109	345	243.11	21.7109	347.57	263.61
26.2299	24.7821	26.2299	18.56	26.2299	18.5577		20.725	266	20.725	255	20.725	282		21.7277	352.04	241	21.7277	343.32	243.16	21.7277	347.1	263.64
26.2498	24.7115	26.2498	18.28	26.2498	18.6763		20.7417	258	20.7417	279	20.7417	303		21.7444	353.33	241.05	21.7444	341.27	243.21	21.7444	346.37	263.68
26.2696	24.9199	26.2696	18.94	26.2696	18.9295		20.7584	244	20.7584	252	20.7584	290		21.7611	354.19	241.1	21.7611	338.85	243.25	21.7611	345.57	263.72
26.2894	25.2436	26.2894	18.95	26.2894	19.0609		20.7751	267	20.7751	230	20.7751	290		21.7778	354.63	241.16	21.7778	336.29	243.3	21.7778	344.69	263.76
26.3093	26.2308	26.3093	19.27	26.3093	19.3494		20.7918	254	20.7918	243	20.7918	303		21.7945	354.56	241.21	21.7945	333.78	243.35	21.7945	343.71	263.8
26.3291	25.4904	26.3291	19.5	26.3291	19.4519		20.8085	267	20.8085	247	20.8085	283		21.8112	353.99	241.26	21.8112	331.27	243.4	21.8112	342.69	263.84
26.349	25.5064	26.349	19.11	26.349	19.3558		20.8253	251	20.8253	268	20.8253	317		21.8279	352.99	241.31	21.8279	328.8	243.45	21.8279	341.71	263.87
26.3688	25.5096	26.3688	19.13	26.3688	18.8141		20.842	261	20.842	258	20.842	304		21.8446	351.67	241.36	21.8446	326.48	243.5	21.8446	340.81	263.91
26.3886	24.7975	26.3886	19.09	26.3886	18.8924		20.8587	251	20.8587	240	20.8587	263		21.8613	350.14	241.42	21.8613	324.38	243.54	21.8613	340.04	263.95
26.4085	24.462	26.4085	18.62	26.4085	18.5158		20.8754	252	20.8754	251	20.8754	293		21.8781	348.54	241.47	21.8781	322.59	243.59	21.8781	339.44	263.99
26.4283	24.7373	26.4283	18.54	26.4283	18.3386		20.8921	265	20.8921	286	20.8921	313		21.8948	347.01	241.52	21.8948	321.19	243.64	21.8948	339.07	264.02
26.4482	24.3956	26.4482	18.25	26.4482	18.2152		20.9088	295	20.9088	252	20.9088	296		21.9115	345.65	241.57	21.9115	320.26	243.69	21.9115	339	264.06
26.468	24.2975	26.468	18.3	26.468	18.25		20.9255	264	20.9255	296	20.9255	325		21.9282	344.61	241.63	21.9282	319.84	243.74	21.9282	339.29	264.1
26.4878	24.0316	26.4878	18.41	26.4878	19.2785		20.9422	252	20.9422	275	20.9422	277		21.9449	343.98	241.68	21.9449	320	243.79	21.9449	339.95	264.14
26.5077	24.1646	26.5077	18.83	26.5077	18.9557		20.9589	254	20.9589	278	20.9589	264		21.9616	343.82	241.73	21.9616	320.77	243.84	21.9616	340.98	264.17
26.5275	24.4241	26.5275	18.85	26.5275	19.1994		20.9757	269	20.9757	240	20.9757	300		21.9783	344.15	241.78	21.9783	322.13	243.89	21.9783	342.39	264.21
26.5474	24.5823	26.5474	19.72	26.5474	20.5759		20.9924	267	20.9924	243	20.9924	287		21.995	344.92	241.83	21.995	324.01	243.93	21.995	344.19	264.25
26.5672	25.6835	26.5672	19.8	26.5672	21.5886		21.0091	278	21.0091	265	21.0091	328		22.0118	345.98	241.89	22.0118	326.28	243.98	22.0118	346.37	264.28
26.587	26.9	26.587	21.27	26.587	22.8469		21.0258	235	21.0258	287	21.0258	276		22.0285	347.14	241.94	22.0285	328.66	244.03	22.0285	348.87	264.32
26.6069	27.675	26.6069	22.84	26.6069	23.2063		21.0425	273	21.0425	256	21.0425	302		22.0452	348.21	241.99	22.0452	330.87	244.08	22.0452	351.85	264.36
26.6267	28.0531	26.6267	24.97	26.6267	23.9438		21.0592	258	21.0592	270	21.0592	305		22.0619	349.11	242.04	22.0619	332.73	244.13	22.0619	355.54	264.4
26.6466	28.3531	26.6466	25.73	26.6466	23.9156		21.0759	288	21.0759	269	21.0759	302		22.0786	349.91	242.1	22.0786	334.26	244.18	22.0786	360.48	264.43
26.6664	27.8438	26.6664	25.98	26.6664	22.8938		21.0926	268	21.0926	280	21.0926	283		22.0953	350.84	242.15	22.0953	335.66	244.23	22.0953	366.56	264.47
26.6862	27.0563	26.6862	24.45	26.6862	21.8781		21.1093	261	21.1093	266	21.1093	291		22.112	352.16	242.2	22.112	337.24	244.28	22.112	371.69	264.5
26.7061	25.8875	26.7061	22.65	26.7061	20.8063		21.126	275	21.126	258	21.126	311		22.1287	354.1	242.25	22.1287	339.29	244.32	22.1287	374	264.54
26.7259	25.5719	26.7259	21.49	26.7259	19.8813		21.1428	292	21.1428	296	21.1428	310		22.1454	356.86	242.3	22.1454	342.01	244.37	22.1454	375.1	264.58
26.7457	24.5656	26.7457	20.21	26.7457	19.0438		21.1595	258	21.1595	265	21.1595	308		22.1621	360.53	242.36	22.1621	345.54	244.42	22.1621	376.97	264.61
26.7656	23.7563	26.7656	19.01	26.7656	18.5594		21.1762	254	21.1762	264	21.1762	310		22.1789	365.13	242.41	22.1789	349.9	244.47	22.1789	379.87	264.65
26.7854	23.3219	26.7854	18.04	26.7854	18.0063		21.1929	263	21.1929	260	21.1929	327		22.1956	370.6	242.46	22.1956	355.04	244.52	22.1956	383.29	264.69
26.8053	23.225	26.8053	17.41	26.8053	17.7906		21.2096	241	21.2096	294	21.2096	274		22.2123	376.27	242.51	22.2123	360.33	244.57	22.2123	387.36	264.72
26.8251	23.4781	26.8251	17.07	26.8251	18.2281		21.2263	280	21.2263	285	21.2263	287		22.229	383.2	242.57	22.229	366.73	244.62	22.229	393.33	264.76
26.8449	23.4281	26.8449	17.35	26.8449	18.0625		21.243	283	21.243	281	21.243	281		22.2457	390.69	242.62	22.2457	373.57	244.67	22.2457	399.91	264.79
26.8648	22.6625	26.8648	17.76	26.8648	18.2188		21.2597	285	21.2597	258	21.2597	287		22.2624	398.57	242.67	22.2624	380.73	244.72	22.2624	406.83	264.83
26.8846	23.6531	26.8846	17.44	26.8846	17.8719		21.2765	287	21.2765	254	21.2765	284		22.2791	406.7	242.72	22.2791	388.06	244.76	22.2791	413.94	264.86
26.9045	23.2156	26.9045	17.4	26.9045	17.7875		21.2932	295	21.2932	276	21.2932	281		22.2958	414.86	242.77	22.2958	395.37	244.81	22.2958	421.1	264.9
26.9243	23.0156	26.9243	17.92	26.9243	18.425		21.3099	262	21.3099	291	21.3099	320		22.3125	422.88	242.83	22.3125	402.49	244.86	22.3125	428.2	264.94
26.9441	23.325	26.9441	17.52	26.9441	19.4281		21.3266	247	21.3266	267	21.3266	310		22.3293	430.54	242.88	22.3293	409.24	244.91	22.3293	435.11	264.97
26.964	23.0469	26.964	17.43	26.964	20.25		21.3433	287	21.3433	302	21.3433	288		22.346	437.66	242.93	22.346	415.45	244.96	22.346	441.7	265.01
26.9838	23.8813	26.9838	17.46	26.9838	21.0125		21.36	264	21.36	274	21.36	293		22.3627	444.07	242.98	22.3627	420.95	245.01	22.3627	447.85	265.04
27.0037	23.2563	27.0037	17.64	27.0037	20.6813		21.3767	261	21.3767	284	21.3767	313		22.3794	449.61	243.03	22.3794	425.62	245.06	22.3794	453.46	265.08
27.0235	23	27.0235	17.53	27.0235	19.8625		21.3934	271	21.3934	271	21.3934	319		22.3961	454.21	243.09	22.3961	429.39	245.11	22.3961	458.43	265.11
27.0433	23.3	27.0433	17.86	27.0433	19.3125		21.4101	281	21.4101	271	21.4101	312		22.4128	457.81	243.14	22.4128	432.21	245.15	22.4128	462.71	265.15
27.0632	23.1173	27.0632	18.06	27.0632	18.9167		21.4269	257	21.4269	271	21.4269	305		22.4295	460.4	243.19	22.4295	434.11	245.2	22.4295	466.24	265.18
27.083	23.6698	27.083	17.21	27.083	18.608		21.4436	260	21.4436	311	21.4436	333		22.4462	462.03	243.24	22.4462	435.14	245.25	22.4462	469	265.21
27.1029	24	27.1029	18.12	27.1029	18.1327		21.4603	266	21.4603	281	21.4603	287		22.4629	462.75	243.29	22.4629	435.36	245.3	22.4629	471.01	265.25
27.1227	24.108	27.1227	18.63	27.1227	18.0926		21.477	247	21.477	294	21.477	334		22.4797	462.6	243.34	22.4797	434.81	245.35	22.4797	472.3	265.28
27.1425	24.3735	27.1425	19.13	27.1425	17.9938		21.4937	264	21.4937	283	21.4937	319		22.4964	461.61	243.4	22.4964	433.46	245.4	22.4964	472.9	265.32
27.1624	24.5895	27.1624	19.05	27.1624	17.9475		21.5104	301	21.5104	277	21.5104	302		22.5131	459.75	243.45	22.5131	431.27	245.45	22.5131	472.9	265.35
27.1822	25.037	27.1822	19.9	27.1822	17.716		21.5271	315	21.5271	296	21.5271	336		22.5298	457.04	243.5	22.5298	428.22	245.49	22.5298	472.36	265.39
27.2021	25.0802	27.2021	19.6	27.2021	17.9969		21.5438	295	21.5438	271	21.5438	303		22.5465	453.56	243.55	22.5465	424.46	245.54	22.5465	471.36	265.42
27.2219	24.5216	27.2219	18.89	27.2219	18.0278		21.5605	273	21.5605	292	21.5605	308		22.5632	449.51	243.6	22.5632	420.28	245.59	22.5632	469.98	265.45
27.2417	24.0062	27.2417	18.66	27.2417	17.6049		21.5772	313	21.5772	271	21.5772	305		22.5799	445.2	243.65	22.5799	416.03	245.64	22.5799	468.28	265.49
27.2616	24.0556	27.2616	18.45	27.2616	17.534		21.594	305	21.594	316	21.594	282		22.5966	440.95	243.71	22.5966	412.08	245.69	22.5966	466.35	265.52
27.2814	23.6944	27.2814	17.58	27.2814	17.2963		21.6107	309	21.6107	290	21.6107	343		22.6134	437.08	243.76	22.6134	408.71	245.74	22.6134	464.23	265.55
27.3012	22.6494	27.3012	17.4	27.3012	17.5671		21.6274	286	21.6274	320	21.6274	302		22.6301	433.82	243.81	22.6301	406.12	245.79	22.6301	461.98	265.59
27.3211	23.311	27.3211	17.46	27.3211	16.8201		21.6441	330	21.6441	293	21.6441	338		22.6468	431.33	243.86	22.6468	404.44	245.83	22.6468	459.65	265.62
27.3409	22.8537	27.3409	17.18	27.3409	17.0915		21.6608	341	21.6608	282	21.6608	322		22.6635	429.71	243.91	22.6635	403.68	245.88	22.6635	457.29	265.65
27.3608	22.6951	27.3608	16.86	27.3608	17.3506		21.6775	301	21.6775	297	21.6775	306		22.6802	428.97	243.96	22.6802	403.85	245.93	22.6802	454.92	265.69
27.3806	22.6951	27.3806	16.92	27.3806	16.561		21.6942	297	21.6942	306	21.6942	333		22.6969	429.07	244.01	22.6969	404.92	245.98	22.6969	452.58	265.72
27.4004	22.7866	27.4004	17.02	27.4004	16.8232		21.7109	312	21.7109	311	21.7109	350		22.7136	429.95	244.07	22.7136	406.81	246.03	22.7136	450.32	265.75
27.4203	23.0579	27.4203	16.89	27.4203	17.3689		21.7277	308	21.7277	302	21.7277	304		22.7303	431.48	244.12	22.7303	409.42	246.08	22.7303	448.19	265.79
27.4401	23.0152	27.4401	17.16	27.4401	17.8201		21.7444	301	21.7444	307	21.7444	291		22.747	433.43	244.17	22.747	412.54	246.12	22.747	446.27	265.82
27.46	22.9817	27.46	17.33	27.46	18.9634		21.7611	289	21.7611	318	21.7611	319		22.7637	435.47	244.22	22.7637	415.81	246.17	22.7637	444.69	265.85
27.4798	22.9573	27.4798	17.23	27.4798	19.8445		21.7778	316	21.7778	266	21.7778	329		22.7805	437.15	244.27	22.7805	418.72	246.22	22.7805	443.48	265.88
27.4996	23.1677	27.4996	17.29	27.4996	20.436		21.7945	336	21.7945	304	21.7945	341		22.7972	437.94	244.32	22.7972	420.64	246.27	22.7972	442.78	265.91
27.5195	23.436	27.5195	17.82	27.5195	20.2287		21.8112	337	21.8112	282	21.8112	320		22.8139	437.44	244.37	22.8139	421.06	246.32	22.8139	442.84	265.95
27.5393	23.0762	27.5393	17.22	27.5393	20.2957		21.8279	337	21.8279	303	21.8279	318		22.8306	435.5	244.42	22.8306	419.83	246.37	22.8306	443.85	265.98
27.5592	23.6982	27.5592	18.05	27.5592	19.939		21.8446	323	21.8446	282	21.8446	319		22.8473	432.41	244.47	22.8473	417.5	246.41	22.8473	446.35	266.01
27.579	22.7073	27.579	18.3	27.579	19.4573		21.8613	335	21.8613	306	21.8613	347		22.864	428.87	244.52	22.864	414.83	246.46	22.864	448.62	266.04
27.5988	23.061	27.5988	19.1	27.5988	18.5488		21.8781	301	21.8781	324	21.8781	294		22.8807	425.7	244.57	22.8807	413.07	246.51	22.8807	448.92	266.07
27.6187	24.0518	27.6187	20.13	27.6187	18.3537		21.8948	279	21.8948	284	21.8948	296		22.8974	423.39	244.62	22.8974	411.96	246.56	22.8974	446.93	266.11
27.6385	23.1799	27.6385	20.04	27.6385	18.1067		21.9115	328	21.9115	273	21.9115	324		22.9141	420.68	244.68	22.9141	409.77	246.61	22.9141	444.76	266.14
27.6584	23.2348	27.6584	19.7	27.6584	18.3872		21.9282	292	21.9282	282	21.9282	341		22.9309	416.1	244.73	22.9309	405.09	246.65	22.9309	443.05	266.17
27.6782	22.5732	27.6782	19.39	27.6782	19.0335		21.9449	295	21.9449	295	21.9449	300		22.9476	410.06	244.78	22.9476	400.16	246.7	22.9476	440.91	266.2
27.698	23.3323	27.698	18.75	27.698	19.311		21.9616	315	21.9616	295	21.9616	300		22.9643	404.7	244.83	22.9643	396.65	246.75	22.9643	438.92	266.23
27.7179	23.2835	27.7179	18.78	27.7179	19.6433		21.9783	298	21.9783	305	21.9783	319		22.981	400.39	244.88	22.981	394.26	246.8	22.981	437.38	266.26
27.7377	24.1205	27.7377	18.37	27.7377	19.3133		21.995	303	21.995	320	21.995	327		22.9977	396.97	244.93	22.9977	392.73	246.84	22.9977	436.12	266.29
27.7576	23.6657	27.7576	18.22	27.7576	19		22.0117	322	22.0117	331	22.0117	354		23.0144	394.8	244.98	23.0144	392.74	246.89	23.0144	434.78	266.32
27.7774	22.8554	27.7774	18.25	27.7774	19.0392		22.0285	314	22.0285	322	22.0285	328		23.0311	394.18	245.03	23.0311	394.34	246.94	23.0311	433.33	266.35
27.7972	23.512	27.7972	18.15	27.7972	18.4217		22.0452	339	22.0452	322	22.0452	317		23.0478	394.6	245.08	23.0478	396.63	246.99	23.0478	431.78	266.38
27.8171	23.4578	27.8171	18.25	27.8171	18.1536		22.0619	312	22.0619	313	22.0619	343		23.0646	395.31	245.13	23.0646	398.91	247.03	23.0646	430.11	266.41
27.8369	23.3313	27.8369	18.74	27.8369	17.8042		22.0786	336	22.0786	346	22.0786	350		23.0813	395.69	245.18	23.0813	400.52	247.08	23.0813	428.37	266.45
27.8567	23.9819	27.8567	19.45	27.8567	18		22.0953	333	22.0953	331	22.0953	343		23.098	395.22	245.23	23.098	400.86	247.13	23.098	426.51	266.48
27.8766	24.262	27.8766	18.97	27.8766	17.744		22.112	343	22.112	281	22.112	355		23.1147	393.52	245.28	23.1147	399.64	247.18	23.1147	424.49	266.51
27.8964	24.4277	27.8964	19.18	27.8964	17.9608		22.1287	332	22.1287	315	22.1287	358		23.1314	390.47	245.33	23.1314	397.03	247.22	23.1314	422.36	266.54
27.9163	24.244	27.9163	19.42	27.9163	17.759		22.1454	323	22.1454	301	22.1454	359		23.1481	386.33	245.38	23.1481	393.42	247.27	23.1481	420.34	266.56
27.9361	23.9849	27.9361	19.99	27.9361	17.6928		22.1622	298	22.1622	319	22.1622	312		23.1648	381.65	245.43	23.1648	389.28	247.32	23.1648	418.61	266.59
27.9559	24.1205	27.9559	20.45	27.9559	18.0783		22.1789	324	22.1789	325	22.1789	335		23.1815	377.01	245.47	23.1815	385.18	247.37	23.1815	417.24	266.62
27.9758	24.4036	27.9758	20.55	27.9758	17.6928		22.1956	304	22.1956	354	22.1956	360		23.1983	372.85	245.52	23.1983	381.66	247.41	23.1983	416.32	266.65
27.9956	25.0268	27.9956	20.68	27.9956	17.628		22.2123	307	22.2123	307	22.2123	341		23.215	369.44	245.57	23.215	379	247.46	23.215	415.92	266.68
28.0155	25.8274	28.0155	19.38	28.0155	17.9821		22.229	323	22.229	345	22.229	333		23.2317	366.91	245.62	23.2317	377.18	247.51	23.2317	416.04	266.71
28.0353	26.7708	28.0353	19.09	28.0353	17.747		22.2457	359	22.2457	360	22.2457	391		23.2484	365.29	245.67	23.2484	376.18	247.55	23.2484	416.62	266.74
28.0551	27.1458	28.0551	19.21	28.0551	17.5208		22.2624	341	22.2624	331	22.2624	366		23.2651	364.44	245.72	23.2651	375.91	247.6	23.2651	417.58	266.77
28.075	25.631	28.075	17.98	28.075	17.2351		22.2791	367	22.2791	295	22.2791	399		23.2818	364.24	245.77	23.2818	376.2	247.65	23.2818	418.85	266.8
28.0948	25.6786	28.0948	18.18	28.0948	17.2113		22.2958	385	22.2958	308	22.2958	397		23.2985	364.55	245.82	23.2985	376.89	247.69	23.2985	420.31	266.83
28.1147	25.4762	28.1147	18.38	28.1147	16.9226		22.3126	391	22.3126	397	22.3126	445		23.3152	365.23	245.87	23.3152	377.85	247.74	23.3152	421.85	266.86
28.1345	24.7946	28.1345	18.73	28.1345	17.1994		22.3293	411	22.3293	388	22.3293	422		23.3319	366.17	245.92	23.3319	378.98	247.79	23.3319	423.35	266.88
28.1543	24.1131	28.1543	18.96	28.1543	16.5089		22.346	432	22.346	377	22.346	451		23.3486	367.26	245.96	23.3486	380.17	247.83	23.3486	424.71	266.91
28.1742	24.2143	28.1742	19.04	28.1742	16.7143		22.3627	448	22.3627	443	22.3627	415		23.3654	368.4	246.01	23.3654	381.33	247.88	23.3654	425.84	266.94
28.194	24.0923	28.194	18.28	28.194	17.119		22.3794	458	22.3794	422	22.3794	441		23.3821	369.51	246.06	23.3821	382.37	247.93	23.3821	426.66	266.97
28.2139	24.0387	28.2139	18.32	28.2139	17.0268		22.3961	469	22.3961	449	22.3961	459		23.3988	370.52	246.11	23.3988	383.22	247.97	23.3988	427.11	267
28.2337	25.1399	28.2337	18.13	28.2337	17.0536		22.4128	466	22.4128	439	22.4128	445		23.4155	371.36	246.16	23.4155	383.82	248.02	23.4155	427.17	267.02
28.2535	25.0357	28.2535	17.34	28.2535	17.1429		22.4295	460	22.4295	447	22.4295	473		23.4322	372.01	246.21	23.4322	384.14	248.06	23.4322	426.82	267.05
28.2734	24.8452	28.2734	17.34	28.2734	17.5119		22.4462	500	22.4462	416	22.4462	493		23.4489	372.43	246.26	23.4489	384.16	248.11	23.4489	426.08	267.08
28.2932	24.9315	28.2932	17.76	28.2932	17.3393		22.4629	464	22.4629	455	22.4629	468		23.4656	372.63	246.3	23.4656	383.88	248.16	23.4656	424.99	267.11
28.3131	24.6607	28.3131	17.46	28.3131	17.4643		22.4797	480	22.4797	459	22.4797	471		23.4823	372.61	246.35	23.4823	383.32	248.2	23.4823	423.6	267.13
28.3329	24.4048	28.3329	17.93	28.3329	17.4107		22.4964	484	22.4964	467	22.4964	497		23.4991	372.4	246.4	23.4991	382.51	248.25	23.4991	421.97	267.16
28.3527	24.1458	28.3527	18.02	28.3527	17.2143		22.5131	478	22.5131	411	22.5131	500		23.5158	372.04	246.45	23.5158	381.5	248.29	23.5158	420.17	267.19
28.3726	24.9821	28.3726	18.53	28.3726	17.5327		22.5298	502	22.5298	456	22.5298	497		23.5325	371.57	246.49	23.5325	380.33	248.34	23.5325	418.26	267.21
28.3924	25.4529	28.3924	20.47	28.3924	17.4647		22.5465	439	22.5465	459	22.5465	505		23.5492	371.02	246.54	23.5492	379.07	248.39	23.5492	416.29	267.24
28.4122	26.5353	28.4122	21.53	28.4122	18.2647		22.5632	465	22.5632	430	22.5632	484		23.5659	370.43	246.59	23.5659	377.75	248.43	23.5659	414.31	267.27
28.4321	26.9941	28.4321	22.15	28.4321	18.1294		22.5799	400	22.5799	392	22.5799	470		23.5826	369.85	246.64	23.5826	376.43	248.48	23.5826	412.35	267.29
28.4519	27.7441	28.4519	23.01	28.4519	19.0235		22.5966	452	22.5966	428	22.5966	512		23.5993	369.28	246.68	23.5993	375.12	248.52	23.5993	410.43	267.32
28.4718	29.0147	28.4718	22.93	28.4718	19.6853		22.6134	431	22.6134	396	22.6134	479		23.616	368.73	246.73	23.616	373.86	248.57	23.616	408.56	267.35
28.4916	30.2618	28.4916	22.54	28.4916	19.8059		22.6301	439	22.6301	421	22.6301	476		23.6327	368.22	246.78	23.6327	372.65	248.61	23.6327	406.73	267.37
28.5114	30.9647	28.5114	22.7	28.5114	20.7735		22.6468	476	22.6468	396	22.6468	458		23.6494	367.71	246.83	23.6494	371.48	248.66	23.6494	404.93	267.4
28.5313	31.2118	28.5313	23.33	28.5313	21.9471		22.6635	401	22.6635	393	22.6635	420		23.6662	367.19	246.87	23.6662	370.33	248.7	23.6662	403.15	267.42
28.5511	31.0147	28.5511	23.11	28.5511	23.3206		22.6802	391	22.6802	380	22.6802	430		23.6829	366.63	246.92	23.6829	369.19	248.75	23.6829	401.37	267.45
28.571	30.3294	28.571	23.06	28.571	23.7971		22.6969	401	22.6969	409	22.6969	492		23.6996	365.99	246.97	23.6996	368.01	248.79	23.6996	399.59	267.48
28.5908	30.3529	28.5908	22.88	28.5908	24.3176		22.7136	437	22.7136	387	22.7136	449		23.7163	365.25	247.01	23.7163	366.78	248.84	23.7163	397.81	267.5
28.6106	29.5971	28.6106	23.04	28.6106	23.9088		22.7303	406	22.7303	383	22.7303	429		23.733	364.38	247.06	23.733	365.48	248.88	23.733	396.05	267.53
28.6305	28.7294	28.6305	21.98	28.6305	22.7324		22.747	437	22.747	418	22.747	441		23.7497	363.47	247.11	23.7497	364.19	248.93	23.7497	394.41	267.55
28.6503	27.4412	28.6503	21.98	28.6503	21.2971		22.7638	389	22.7638	388	22.7638	446		23.7664	362.31	247.15	23.7664	362.7	248.97	23.7664	392.78	267.58
28.6702	26.6353	28.6702	20.4	28.6702	20.0529		22.7805	405	22.7805	429	22.7805	430		23.7831	361	247.2	23.7831	361.12	249.02	23.7831	391.32	267.6
28.69	24.7059	28.69	19.11	28.69	19.6382		22.7972	393	22.7972	415	22.7972	424		23.7999	359.59	247.25	23.7999	359.47	249.06	23.7999	390.16	267.63
28.7098	24.6453	28.7098	19.26	28.7098	18.0116		22.8139	412	22.8139	411	22.8139	421		23.8166	358.09	247.29	23.8166	357.79	249.11	23.8166	389.39	267.65
28.7297	23.4448	28.7297	17.91	28.7297	17.1541		22.8306	449	22.8306	423	22.8306	451		23.8333	356.55	247.34	23.8333	356.14	249.15	23.8333	388.71	267.68
28.7495	23.1628	28.7495	17.56	28.7495	17.125		22.8473	506	22.8473	380	22.8473	431		23.85	355.05	247.38	23.85	354.55	249.2	23.85	387.81	267.7
28.7694	22.9971	28.7694	16.87	28.7694	17.0523		22.864	443	22.864	409	22.864	402		23.8667	353.64	247.43	23.8667	353.11	249.24	23.8667	386.87	267.72
28.7892	22.7849	28.7892	16.93	28.7892	16.4651		22.8807	425	22.8807	403	22.8807	422		23.8834	352.4	247.47	23.8834	351.87	249.28	23.8834	386.29	267.75
28.809	22.5291	28.809	16.37	28.809	16.3081		22.8974	347	22.8974	431	22.8974	432		23.9001	351.42	247.52	23.9001	350.91	249.33	23.9001	386.17	267.77
28.8289	22.2878	28.8289	16.47	28.8289	16.1977		22.9141	388	22.9141	431	22.9141	469		23.9168	350.78	247.57	23.9168	350.33	249.37	23.9168	386.24	267.8
28.8487	22.2471	28.8487	16.32	28.8487	15.9884		22.9309	417	22.9309	389	22.9309	456		23.9335	350.58	247.61	23.9335	350.21	249.42	23.9335	386.64	267.82
28.8686	22.2529	28.8686	16.37	28.8686	16.1366		22.9476	385	22.9476	395	22.9476	480		23.9502	350.9	247.66	23.9502	350.65	249.46	23.9502	387.44	267.84
28.8884	22.439	28.8884	16.28	28.8884	16.1773		22.9643	407	22.9643	405	22.9643	446		23.967	351.83	247.7	23.967	351.74	249.5	23.967	388.53	267.87
28.9082	22.1308	28.9082	16.12	28.9082	16.3227		22.981	390	22.981	382	22.981	427		23.9837	353.45	247.75	23.9837	353.56	249.55	23.9837	389.83	267.89
28.9281	21.9913	28.9281	16.19	28.9281	15.8198		22.9977	394	22.9977	439	22.9977	438		24.0004	355.79	247.79	24.0004	356.14	249.59	24.0004	391.32	267.91
28.9479	22.1715	28.9479	16.41	28.9479	15.7355		23.0144	389	23.0144	402	23.0144	465		24.0171	358.85	247.84	24.0171	359.45	249.63	24.0171	393.04	267.94
28.9677	21.4651	28.9677	15.85	28.9677	15.8779		23.0311	426	23.0311	398	23.0311	444		24.0338	362.57	247.88	24.0338	363.35	249.68	24.0338	395.07	267.96
28.9876	22.2006	28.9876	15.88	28.9876	15.843		23.0478	404	23.0478	413	23.0478	483		24.0505	366.76	247.93	24.0505	367.55	249.72	24.0505	397.49	267.98
29.0074	21.8547	29.0074	16.29	29.0074	15.6599		23.0646	406	23.0646	406	23.0646	472		24.0672	371.14	247.97	24.0672	371.66	249.76	24.0672	400.38	268
29.0273	21.5727	29.0273	16.43	29.0273	15.6017		23.0813	394	23.0813	411	23.0813	421		24.0839	375.37	248.01	24.0839	375.35	249.81	24.0839	403.83	268.03
29.0471	21.6105	29.0471	15.7	29.0471	15.9157		23.098	399	23.098	434	23.098	424		24.1006	379.19	248.06	24.1006	378.54	249.85	24.1006	407.98	268.05
29.0669	21.5	29.0669	15.69	29.0669	15.8937		23.1147	380	23.1147	397	23.1147	432		24.1174	382.55	248.1	24.1174	381.5	249.89	24.1174	412.95	268.07
29.0868	21.8075	29.0868	16.07	29.0868	16.0718		23.1314	410	23.1314	400	23.1314	458		24.1341	385.65	248.15	24.1341	384.69	249.93	24.1341	418.82	268.09
29.1066	21.8276	29.1066	15.91	29.1066	15.7011		23.1481	410	23.1481	402	23.1481	445		24.1508	388.81	248.19	24.1508	388.68	249.98	24.1508	425.64	268.12
29.1265	21.9799	29.1265	15.78	29.1265	15.7557		23.1648	406	23.1648	403	23.1648	454		24.1675	392.42	248.23	24.1675	394.02	250.02	24.1675	433.47	268.14
29.1463	21.5603	29.1463	15.87	29.1463	15.7586		23.1815	360	23.1815	378	23.1815	434		24.1842	396.82	248.28	24.1842	401.2	250.06	24.1842	442.31	268.16
29.1661	21.7759	29.1661	16.08	29.1661	15.9799		23.1983	352	23.1983	421	23.1983	434		24.2009	402.25	248.32	24.2009	410.63	250.1	24.2009	452.11	268.18
29.186	21.6351	29.186	15.57	29.186	16.2069		23.215	376	23.215	356	23.215	411		24.2176	408.86	248.37	24.2176	422.58	250.15	24.2176	462.72	268.2
29.2058	21.6609	29.2058	15.69	29.2058	15.8592		23.2317	391	23.2317	401	23.2317	434		24.2343	416.64	248.41	24.2343	437.07	250.19	24.2343	473.86	268.22
29.2257	21.7098	29.2257	15.77	29.2257	15.8218		23.2484	369	23.2484	393	23.2484	428		24.2511	425.45	248.45	24.2511	453.68	250.23	24.2511	485.04	268.24
29.2455	21.7586	29.2455	15.96	29.2455	15.4626		23.2651	405	23.2651	393	23.2651	420		24.2678	435	248.5	24.2678	471.1	250.27	24.2678	495.58	268.26
29.2653	21.477	29.2653	16.14	29.2653	15.6724		23.2818	359	23.2818	396	23.2818	396		24.2845	444.86	248.54	24.2845	486.82	250.32	24.2845	504.59	268.29
29.2852	21.7529	29.2852	15.72	29.2852	15.6207		23.2985	384	23.2985	385	23.2985	401		24.3012	454.43	248.58	24.3012	497.54	250.36	24.3012	511.13	268.31
29.305	21.5316	29.305	15.93	29.305	15.7241		23.3152	370	23.3152	369	23.3152	433		24.3179	462.99	248.62	24.3179	500.69	250.4	24.3179	514.45	268.33
29.3249	21.3247	29.3249	15.89	29.3249	15.4828		23.3319	384	23.3319	383	23.3319	426		24.3346	469.75	248.67	24.3346	495.99	250.44	24.3346	514.18	268.35
29.3447	21.0201	29.3447	16.01	29.3447	15.9425		23.3486	392	23.3486	391	23.3486	410		24.3513	474.05	248.71	24.3513	485.39	250.48	24.3513	510.49	268.37
29.3645	21.2557	29.3645	15.71	29.3645	15.4885		23.3654	374	23.3654	393	23.3654	403		24.368	475.56	248.75	24.368	471.69	250.52	24.368	504.04	268.39
29.3844	21.7557	29.3844	15.88	29.3844	16.0718		23.3821	334	23.3821	400	23.3821	414		24.3848	474.35	248.79	24.3848	457.41	250.56	24.3848	495.8	268.41
29.4042	21.8736	29.4042	15.77	29.4042	15.7443		23.3988	351	23.3988	424	23.3988	453		24.4015	470.89	248.84	24.4015	444.55	250.61	24.4015	486.85	268.43
29.4241	22.0028	29.4241	15.66	29.4241	15.7415		23.4155	348	23.4155	385	23.4155	424		24.4182	465.93	248.88	24.4182	434.52	250.65	24.4182	478.17	268.45
29.4439	21.3523	29.4439	15.91	29.4439	15.9886		23.4322	354	23.4322	437	23.4322	409		24.4349	460.32	248.92	24.4349	427.95	250.69	24.4349	470.54	268.47
29.4637	21.6676	29.4637	15.77	29.4637	16.1364		23.4489	352	23.4489	425	23.4489	415		24.4516	454.84	248.96	24.4516	424.74	250.73	24.4516	464.48	268.49
29.4836	21.804	29.4836	15.82	29.4836	16.1534		23.4656	359	23.4656	383	23.4656	394		24.4683	450.15	249	24.4683	424.39	250.77	24.4683	460.31	268.51
29.5034	21.517	29.5034	16.33	29.5034	16.4205		23.4823	385	23.4823	412	23.4823	406		24.485	446.74	249.05	24.485	426.36	250.81	24.485	458.15	268.53
29.5232	21.929	29.5232	16.68	29.5232	15.9545		23.4991	371	23.4991	384	23.4991	424		24.5017	444.9	249.09	24.5017	430.25	250.85	24.5017	458.08	268.54
29.5431	22.1733	29.5431	16.65	29.5431	16.4972		23.5158	366	23.5158	361	23.5158	404		24.5184	444.64	249.13	24.5184	435.73	250.89	24.5184	459.62	268.56
29.5629	22.0966	29.5629	16.88	29.5629	16.4545		23.5325	412	23.5325	384	23.5325	421		24.5351	445.53	249.17	24.5351	442.61	250.93	24.5351	462.24	268.58
29.5828	21.8551	29.5828	16.09	29.5828	16.3097		23.5492	356	23.5492	364	23.5492	416		24.5519	446.81	249.21	24.5519	449.69	250.97	24.5519	465.29	268.6
29.6026	21.7386	29.6026	16.55	29.6026	16.2244		23.5659	382	23.5659	366	23.5659	383		24.5686	449.02	249.25	24.5686	457.34	251.01	24.5686	470.12	268.62
29.6224	22.2188	29.6224	16.34	29.6224	16.2926		23.5826	379	23.5826	350	23.5826	410		24.5853	452.19	249.29	24.5853	464.89	251.05	24.5853	476.29	268.64
29.6423	22.5653	29.6423	16.52	29.6423	16.3551		23.5993	372	23.5993	419	23.5993	438		24.602	456.26	249.33	24.602	472.7	251.09	24.602	483.39	268.66
29.6621	22.0824	29.6621	16.37	29.6621	16.446		23.616	355	23.616	341	23.616	409		24.6187	460.9	249.37	24.6187	480.76	251.13	24.6187	491.37	268.67
29.682	23.0227	29.682	16.27	29.682	15.7131		23.6327	365	23.6327	369	23.6327	390		24.6354	466.01	249.41	24.6354	488.57	251.17	24.6354	500.22	268.69
29.7018	24.3523	29.7018	16.7	29.7018	16.6023		23.6495	358	23.6495	340	23.6495	409		24.6521	471.52	249.45	24.6521	496.01	251.21	24.6521	509.73	268.71
29.7216	26.6392	29.7216	16.39	29.7216	17.0909		23.6662	373	23.6662	315	23.6662	422		24.6688	477.15	249.5	24.6688	503.01	251.25	24.6688	519.59	268.73
29.7415	28.4719	29.7415	16.92	29.7415	17.2444		23.6829	397	23.6829	377	23.6829	398		24.6855	482.62	249.54	24.6855	509.34	251.29	24.6855	529.58	268.75
29.7613	29.5843	29.7613	17	29.7613	17.1798		23.6996	375	23.6996	341	23.6996	430		24.7023	487.67	249.58	24.7023	514.67	251.33	24.7023	539.45	268.76
29.7812	30.3315	29.7812	17.29	29.7812	17.0674		23.7163	383	23.7163	377	23.7163	402		24.719	492.09	249.62	24.719	518.8	251.37	24.719	548.96	268.78
29.801	29.2949	29.801	17.5	29.801	17.0197		23.733	352	23.733	373	23.733	418		24.7357	495.7	249.65	24.7357	521.57	251.41	24.7357	557.85	268.8
29.8208	29.5702	29.8208	17.18	29.8208	17.1854		23.7497	344	23.7497	360	23.7497	440		24.7524	498.34	249.69	24.7524	522.91	251.45	24.7524	565.86	268.81
29.8407	28.7247	29.8407	17.32	29.8407	16.9242		23.7664	368	23.7664	363	23.7664	414		24.7691	499.89	249.73	24.7691	522.76	251.48	24.7691	572.76	268.83
29.8605	26.7275	29.8605	16.85	29.8605	16.6208		23.7831	362	23.7831	371	23.7831	409		24.7858	500.26	249.77	24.7858	521.15	251.52	24.7858	578.29	268.85
29.8804	24.9466	29.8804	17.08	29.8804	16.8399		23.7998	335	23.7998	390	23.7998	349		24.8025	499.45	249.81	24.8025	518.14	251.56	24.8025	582.28	268.87
29.9002	23.941	29.9002	16.24	29.9002	16.2163		23.8166	366	23.8166	391	23.8166	433		24.8192	497.46	249.85	24.8192	513.88	251.6	24.8192	584.56	268.88
29.92	23.0084	29.92	16.2	29.92	16.2556		23.8333	379	23.8333	390	23.8333	438		24.836	494.37	249.89	24.836	508.53	251.64	24.836	585.06	268.9
29.9399	22.7331	29.9399	15.95	29.9399	16.0028		23.85	399	23.85	388	23.85	437		24.8527	490.31	249.93	24.8527	502.3	251.68	24.8527	583.72	268.91
29.9597	22.441	29.9597	15.99	29.9597	16.0281		23.8667	341	23.8667	352	23.8667	416		24.8694	485.44	249.97	24.8694	495.46	251.71	24.8694	580.58	268.93
29.9796	21.9719	29.9796	16.19	29.9796	15.8933		23.8834	371	23.8834	352	23.8834	395		24.8861	479.96	250.01	24.8861	488.25	251.75	24.8861	575.71	268.95
29.9994	22.6882	29.9994	16.35	29.9994	16.2472		23.9001	387	23.9001	347	23.9001	390		24.9028	474.07	250.04	24.9028	480.94	251.79	24.9028	569.26	268.96
30.0192	22.6798	30.0192	16.19	30.0192	16.382		23.9168	394	23.9168	357	23.9168	441		24.9195	468.04	250.08	24.9195	473.82	251.83	24.9195	561.44	268.98
30.0391	23.6601	30.0391	16.21	30.0391	16.2247		23.9335	416	23.9335	386	23.9335	407		24.9362	462.09	250.12	24.9362	467.13	251.87	24.9362	552.45	268.99
30.0589	24.1404	30.0589	16.63	30.0589	16.3258		23.9503	377	23.9503	407	23.9503	471		24.9529	456.43	250.16	24.9529	461.06	251.9	24.9529	542.56	269.01
30.0787	24.441	30.0787	16.41	30.0787	16.7921		23.967	394	23.967	388	23.967	417		24.9696	451.26	250.2	24.9696	455.71	251.94	24.9696	532.04	269.02
30.0986	24.1292	30.0986	17.16	30.0986	16.6264		23.9837	389	23.9837	390	23.9837	401		24.9863	446.69	250.24	24.9863	451.06	251.98	24.9863	521.14	269.04
30.1184	24.4167	30.1184	17.04	30.1184	16.6028		24.0004	359	24.0004	376	24.0004	393		25.0031	442.71	250.27	25.0031	446.83	252.01	25.0031	510.07	269.05
30.1383	24.6833	30.1383	16.95	30.1383	17.0528		24.0171	382	24.0171	352	24.0171	421		25.0198	439.17	250.31	25.0198	442.54	252.05	25.0198	499.02	269.07
30.1581	24.2389	30.1581	17	30.1581	16.3833		24.0338	382	24.0338	393	24.0338	412		25.0365	435.72	250.35	25.0365	437.62	252.09	25.0365	488.19	269.08
30.1779	24.5972	30.1779	16.86	30.1779	17.3778		24.0505	351	24.0505	419	24.0505	452		25.0532	431.92	250.38	25.0532	431.73	252.13	25.0532	477.84	269.1
30.1978	24.3889	30.1978	17	30.1978	17.0639		24.0672	347	24.0672	373	24.0672	428		25.0699	427.4	250.42	25.0699	424.93	252.16	25.0699	468.11	269.11
30.2176	24.3611	30.2176	17.19	30.2176	17.125		24.0839	378	24.0839	388	24.0839	421		25.0866	422.03	250.46	25.0866	417.65	252.2	25.0866	459.07	269.13
30.2375	24.1306	30.2375	16.86	30.2375	16.9722		24.1007	406	24.1007	395	24.1007	439		25.1033	415.96	250.5	25.1033	410.45	252.24	25.1033	450.85	269.14
30.2573	25.325	30.2573	16.53	30.2573	17.3583		24.1174	387	24.1174	406	24.1174	402		25.12	409.56	250.53	25.12	403.81	252.27	25.12	443.5	269.16
30.2771	24.7444	30.2771	17.26	30.2771	17.5389		24.1341	425	24.1341	373	24.1341	436		25.1368	403.19	250.57	25.1368	398.1	252.31	25.1368	437.06	269.17
30.297	24.7667	30.297	16.81	30.297	18.2667		24.1508	370	24.1508	393	24.1508	433		25.1535	397.14	250.61	25.1535	393.49	252.34	25.1535	431.54	269.18
30.3168	26.1083	30.3168	17.23	30.3168	18.7194		24.1675	411	24.1675	386	24.1675	496		25.1702	391.56	250.64	25.1702	389.92	252.38	25.1702	426.92	269.2
30.3367	25.6972	30.3367	17.58	30.3367	18.4222		24.1842	449	24.1842	473	24.1842	430		25.1869	386.56	250.68	25.1869	387.2	252.42	25.1869	423.18	269.21
30.3565	26.1083	30.3565	17.49	30.3565	18.7		24.2009	405	24.2009	438	24.2009	431		25.2036	382.18	250.71	25.2036	385.1	252.45	25.2036	420.3	269.22
30.3763	25.45	30.3763	17.65	30.3763	18.5806		24.2176	371	24.2176	425	24.2176	459		25.2203	378.46	250.75	25.2203	383.49	252.49	25.2203	418.23	269.24
30.3962	24.8434	30.3962	17.46	30.3962	18.8544		24.2343	418	24.2343	436	24.2343	458		25.237	375.45	250.79	25.237	382.39	252.52	25.237	416.95	269.25
30.416	24.0467	30.416	17.08	30.416	18.5		24.2511	426	24.2511	440	24.2511	506		25.2537	373.18	250.82	25.2537	381.86	252.56	25.2537	416.42	269.26
30.4359	23.8709	30.4359	17.01	30.4359	17.7665		24.2678	415	24.2678	452	24.2678	514		25.2704	371.65	250.86	25.2704	381.97	252.59	25.2704	416.58	269.28
30.4557	22.9286	30.4557	16.73	30.4557	17.4203		24.2845	416	24.2845	502	24.2845	511		25.2872	370.87	250.89	25.2872	382.75	252.63	25.2872	417.48	269.29
30.4755	23.2308	30.4755	16.29	30.4755	17.1016		24.3012	466	24.3012	457	24.3012	452		25.3039	370.78	250.93	25.3039	384.24	252.66	25.3039	419.08	269.3
30.4954	22.8736	30.4954	15.57	30.4954	16.761		24.3179	447	24.3179	450	24.3179	461		25.3206	371.3	250.96	25.3206	386.4	252.7	25.3206	421.56	269.32
30.5152	22.9258	30.5152	16.06	30.5152	16.1181		24.3346	450	24.3346	473	24.3346	509		25.3373	372.34	251	25.3373	389.14	252.73	25.3373	424.6	269.33
30.5351	22.4863	30.5351	15.57	30.5351	16.0522		24.3513	456	24.3513	448	24.3513	465		25.354	373.77	251.03	25.354	392.35	252.77	25.354	427.52	269.34
30.5549	22.3571	30.5549	16.02	30.5549	15.5577		24.368	439	24.368	439	24.368	521		25.3707	375.47	251.07	25.3707	395.9	252.8	25.3707	429.76	269.35
30.5747	22.0385	30.5747	15.61	30.5747	15.7253		24.3848	444	24.3848	457	24.3848	452		25.3874	377.23	251.1	25.3874	399.41	252.84	25.3874	431.93	269.36
30.5946	21.6676	30.5946	15.96	30.5946	15.9286		24.4015	466	24.4015	426	24.4015	457		25.4041	379.1	251.13	25.4041	403.25	252.87	25.4041	435.07	269.38
30.6144	21.8599	30.6144	15.84	30.6144	15.3681		24.4182	458	24.4182	445	24.4182	496		25.4208	380.87	251.17	25.4208	407.01	252.9	25.4208	438.98	269.39
30.6342	21.4203	30.6342	15.85	30.6342	15.7088		24.4349	430	24.4349	439	24.4349	495		25.4376	382.43	251.2	25.4376	410.57	252.94	25.4376	443.43	269.4
30.6541	21.511	30.6541	15.66	30.6541	15.717		24.4516	448	24.4516	449	24.4516	457		25.4543	383.67	251.24	25.4543	413.78	252.97	25.4543	448.68	269.41
30.6739	21.5027	30.6739	15.96	30.6739	15.6044		24.4683	463	24.4683	470	24.4683	557		25.471	384.5	251.27	25.471	416.52	253.01	25.471	454.46	269.42
30.6938	21.3434	30.6938	15.53	30.6938	15.6346		24.485	475	24.485	475	24.485	515		25.4877	384.87	251.3	25.4877	418.67	253.04	25.4877	459.49	269.43
30.7136	21.6456	30.7136	15.39	30.7136	15.5192		24.5017	432	24.5017	430	24.5017	467		25.5044	384.72	251.34	25.5044	420.14	253.07	25.5044	462.24	269.44
30.7334	21.5467	30.7334	15.74	30.7334	15.5934		24.5184	442	24.5184	445	24.5184	491		25.5211	384.03	251.37	25.5211	420.9	253.11	25.5211	461.84	269.45
30.7533	21.1593	30.7533	15.76	30.7533	15.5495		24.5352	463	24.5352	466	24.5352	508		25.5378	382.74	251.4	25.5378	420.86	253.14	25.5378	458.56	269.47
30.7731	21.7885	30.7731	16.03	30.7731	16.6126		24.5519	483	24.5519	478	24.5519	492		25.5545	380.71	251.44	25.5545	419.82	253.17	25.5545	453.29	269.48
30.793	22.1511	30.793	15.84	30.793	15.8462		24.5686	466	24.5686	474	24.5686	524		25.5713	377.89	251.47	25.5713	417.68	253.2	25.5713	446.83	269.49
30.8128	22.0522	30.8128	16.64	30.8128	16.4918		24.5853	486	24.5853	533	24.5853	505		25.588	374.45	251.5	25.588	414.58	253.24	25.588	439.89	269.5
30.8326	22.644	30.8326	17.45	30.8326	16.2092		24.602	507	24.602	496	24.602	525		25.6047	370.57	251.54	25.6047	410.72	253.27	25.6047	433.05	269.51
30.8525	22.5462	30.8525	18.11	30.8525	16.1549		24.6187	470	24.6187	481	24.6187	526		25.6214	366.31	251.57	25.6214	406.19	253.3	25.6214	426.72	269.52
30.8723	23.212	30.8723	17.77	30.8723	15.7011		24.6354	504	24.6354	510	24.6354	533		25.6381	361.71	251.6	25.6381	400.99	253.33	25.6381	420.91	269.53
30.8922	23.6821	30.8922	17.81	30.8922	16.0652		24.6521	519	24.6521	508	24.6521	548		25.6548	356.91	251.63	25.6548	395.31	253.37	25.6548	415.52	269.54
30.912	23.587	30.912	17.43	30.912	15.981		24.6688	487	24.6688	487	24.6688	523		25.6715	352.04	251.67	25.6715	389.3	253.4	25.6715	410.36	269.55
30.9318	23.3288	30.9318	17.39	30.9318	15.5924		24.6855	493	24.6855	507	24.6855	526		25.6882	347.14	251.7	25.6882	383.05	253.43	25.6882	405.26	269.56
30.9517	23.7174	30.9517	17.36	30.9517	15.6005		24.7023	475	24.7023	492	24.7023	545		25.7049	342.28	251.73	25.7049	376.66	253.46	25.7049	400.1	269.57
30.9715	23.3043	30.9715	17.17	30.9715	15.7283		24.719	452	24.719	476	24.719	565		25.7217	337.52	251.76	25.7217	370.22	253.49	25.7217	394.86	269.58
30.9914	23.7636	30.9914	17.16	30.9914	15.8995		24.7357	465	24.7357	508	24.7357	588		25.7384	332.93	251.79	25.7384	363.83	253.53	25.7384	389.59	269.59
31.0112	25.8967	31.0112	17	31.0112	16.1033		24.7524	466	24.7524	495	24.7524	593		25.7551	328.56	251.82	25.7551	357.56	253.56	25.7551	384.32	269.59
31.031	27.7364	31.031	17.21	31.031	16.6848		24.7691	485	24.7691	497	24.7691	558		25.7718	324.5	251.85	25.7718	351.5	253.59	25.7718	379.19	269.6
31.0509	27.7364	31.0509	17.35	31.0509	17.0163		24.7858	471	24.7858	500	24.7858	552		25.7885	320.82	251.89	25.7885	345.7	253.62	25.7885	374.36	269.61
31.0707	27.6747	31.0707	16.78	31.0707	18.6317		24.8025	543	24.8025	474	24.8025	551		25.8052	317.62	251.92	25.8052	340.24	253.65	25.8052	369.54	269.62
31.0906	25.8522	31.0906	16.18	31.0906	19.25		24.8192	472	24.8192	488	24.8192	533		25.8219	314.62	251.95	25.8219	335.17	253.68	25.8219	364.39	269.63
31.1104	25.2715	31.1104	16.11	31.1104	19.086		24.836	447	24.836	496	24.836	466		25.8386	311.41	251.98	25.8386	330.6	253.71	25.8386	358.89	269.64
31.1302	25.1102	31.1302	16.02	31.1302	18.457		24.8527	488	24.8527	509	24.8527	554		25.8553	307.81	252.01	25.8553	326.64	253.74	25.8553	353.65	269.65
31.1501	24.7581	31.1501	16.36	31.1501	17.8172		24.8694	513	24.8694	463	24.8694	551		25.8721	304.3	252.04	25.8721	322.89	253.77	25.8721	348.86	269.65
31.1699	23.6022	31.1699	16.07	31.1699	17.6935		24.8861	450	24.8861	458	24.8861	536		25.8888	301.16	252.07	25.8888	318.85	253.8	25.8888	344.3	269.66
31.1897	22.4812	31.1897	16.09	31.1897	18.0403		24.9028	465	24.9028	495	24.9028	507		25.9055	298.27	252.1	25.9055	314.49	253.83	25.9055	339.97	269.67
31.2096	22.8763	31.2096	15.9	31.2096	17.2823		24.9195	471	24.9195	442	24.9195	527		25.9222	295.56	252.13	25.9222	310.44	253.86	25.9222	336.06	269.68
31.2294	23.0968	31.2294	16.16	31.2294	16.7742		24.9362	439	24.9362	433	24.9362	483		25.9389	293.16	252.16	25.9389	306.91	253.89	25.9389	332.6	269.69
31.2493	22.3871	31.2493	16.38	31.2493	16.1452		24.9529	459	24.9529	483	24.9529	518		25.9556	291.15	252.19	25.9556	303.58	253.92	25.9556	329.45	269.69
31.2691	22.6129	31.2691	16.01	31.2691	16.7608		24.9696	440	24.9696	479	24.9696	534		25.9723	289.44	252.22	25.9723	300.46	253.95	25.9723	326.6	269.7
31.2889	22.4624	31.2889	16.13	31.2889	16.3522		24.9864	454	24.9864	457	24.9864	518		25.989	287.95	252.25	25.989	297.74	253.98	25.989	324.04	269.71
31.3088	22.2876	31.3088	16.34	31.3088	16.4731		25.0031	439	25.0031	454	25.0031	496		26.0057	286.65	252.28	26.0057	295.44	254.01	26.0057	321.76	269.72
31.3286	22.7554	31.3286	16.16	31.3286	16.6102		25.0198	400	25.0198	412	25.0198	560		26.0225	285.51	252.31	26.0225	293.41	254.04	26.0225	319.75	269.72
31.3485	22.0968	31.3485	15.93	31.3485	16.3172		25.0365	442	25.0365	436	25.0365	504		26.0392	284.54	252.33	26.0392	291.61	254.07	26.0392	318.01	269.73
31.3683	21.8602	31.3683	15.72	31.3683	16.5887		25.0532	426	25.0532	438	25.0532	514		26.0559	283.72	252.36	26.0559	289.99	254.1	26.0559	316.53	269.74
31.3881	21.8763	31.3881	15.84	31.3881	15.9462		25.0699	420	25.0699	446	25.0699	460		26.0726	283.04	252.39	26.0726	288.56	254.13	26.0726	315.3	269.74
31.408	21.2661	31.408	15.94	31.408	16.3548		25.0866	423	25.0866	438	25.0866	492		26.0893	282.51	252.42	26.0893	287.29	254.16	26.0893	314.33	269.75
31.4278	21.4677	31.4278	15.84	31.4278	16.1801		25.1033	425	25.1033	406	25.1033	449		26.106	282.11	252.45	26.106	286.18	254.19	26.106	313.6	269.76
31.4477	21.2796	31.4477	15.78	31.4477	15.836		25.12	396	25.12	436	25.12	469		26.1227	281.85	252.48	26.1227	285.22	254.22	26.1227	313.12	269.76
31.4675	21.543	31.4675	16.04	31.4675	15.7231		25.1367	428	25.1367	450	25.1367	489		26.1394	281.73	252.51	26.1394	284.4	254.24	26.1394	312.9	269.77
31.4873	21.2581	31.4873	16.16	31.4873	15.5		25.1535	377	25.1535	403	25.1535	424		26.1561	281.75	252.53	26.1561	283.72	254.27	26.1561	312.93	269.78
31.5072	21.578	31.5072	16.13	31.5072	15.9597		25.1702	423	25.1702	409	25.1702	434		26.1728	281.9	252.56	26.1728	283.17	254.3	26.1728	313.22	269.78
31.527	21.2581	31.527	16.4	31.527	15.9651		25.1869	419	25.1869	377	25.1869	431		26.1896	282.2	252.59	26.1896	282.76	254.33	26.1896	313.76	269.79
31.5469	21.9814	31.5469	16.5	31.5469	15.7074		25.2036	398	25.2036	392	25.2036	463		26.2063	282.63	252.62	26.2063	282.47	254.36	26.2063	314.56	269.79
31.5667	22.0745	31.5667	16.51	31.5667	15.9362		25.2203	418	25.2203	404	25.2203	432		26.223	283.22	252.64	26.223	282.31	254.38	26.223	315.68	269.8
31.5865	21.875	31.5865	15.86	31.5865	16.0106		25.237	395	25.237	375	25.237	428		26.2397	283.87	252.67	26.2397	282.25	254.41	26.2397	316.96	269.8
31.6064	21.7633	31.6064	16.03	31.6064	15.8936		25.2537	378	25.2537	422	25.2537	423		26.2564	284.75	252.7	26.2564	282.34	254.44	26.2564	318.72	269.81
31.6262	21.0426	31.6262	15.55	31.6262	16.0957		25.2704	355	25.2704	409	25.2704	394		26.2731	285.79	252.72	26.2731	282.56	254.47	26.2731	320.85	269.81
31.6461	20.7128	31.6461	15.15	31.6461	15.2287		25.2872	412	25.2872	424	25.2872	426		26.2898	287	252.75	26.2898	282.91	254.49	26.2898	323.37	269.82
31.6659	20.9973	31.6659	15.55	31.6659	15.5798		25.3039	377	25.3039	385	25.3039	443		26.3065	288.36	252.78	26.3065	283.38	254.52	26.3065	326.25	269.83
31.6857	21.2473	31.6857	15.11	31.6857	15.4069		25.3206	374	25.3206	366	25.3206	443		26.3232	289.89	252.8	26.3232	283.99	254.55	26.3232	329.36	269.83
31.7056	21.0824	31.7056	15.43	31.7056	15.7846		25.3373	403	25.3373	429	25.3373	416		26.34	291.57	252.83	26.34	284.72	254.57	26.34	332.43	269.83
31.7254	20.6895	31.7254	15.24	31.7254	15.7474		25.354	411	25.354	405	25.354	456		26.3567	293.41	252.86	26.3567	285.57	254.6	26.3567	335.11	269.84
31.7452	20.3789	31.7452	15.16	31.7452	15.5895		25.3707	358	25.3707	400	25.3707	442		26.3734	295.38	252.88	26.3734	286.54	254.63	26.3734	337.14	269.84
31.7651	21.0809	31.7651	15.15	31.7651	15.35		25.3874	392	25.3874	362	25.3874	418		26.3901	297.48	252.91	26.3901	287.63	254.65	26.3901	338.57	269.85
31.7849	20.7217	31.7849	15.33	31.7849	15.4395		25.4041	360	25.4041	403	25.4041	445		26.4068	299.68	252.93	26.4068	288.82	254.68	26.4068	339.6	269.85
31.8048	21.0526	31.8048	14.89	31.8048	15.4816		25.4208	372	25.4208	399	25.4208	461		26.4235	301.97	252.96	26.4235	290.1	254.7	26.4235	340.43	269.86
31.8246	21.3967	31.8246	15.19	31.8246	15.2105		25.4376	361	25.4376	402	25.4376	420		26.4402	304.32	252.98	26.4402	291.47	254.73	26.4402	341.15	269.86
31.8444	21.3158	31.8444	15.43	31.8444	15.3763		25.4543	378	25.4543	424	25.4543	409		26.4569	306.71	253.01	26.4569	292.92	254.76	26.4569	341.82	269.86
31.8643	21.1618	31.8643	15.31	31.8643	15.4842		25.471	383	25.471	426	25.471	488		26.4737	309.11	253.03	26.4737	294.44	254.78	26.4737	342.47	269.87
31.8841	21.1263	31.8841	15.11	31.8841	15.5105		25.4877	412	25.4877	478	25.4877	488		26.4904	311.5	253.06	26.4904	296	254.81	26.4904	343.08	269.87
31.904	20.9197	31.904	15.24	31.904	15.2553		25.5044	413	25.5044	454	25.5044	506		26.5071	313.85	253.08	26.5071	297.61	254.83	26.5071	343.74	269.88
31.9238	21.1283	31.9238	15.08	31.9238	15.3605		25.5211	428	25.5211	478	25.5211	498		26.5238	316.21	253.11	26.5238	299.29	254.86	26.5238	344.51	269.88
31.9436	20.9414	31.9436	15.18	31.9436	15.4053		25.5378	371	25.5378	487	25.5378	452		26.5405	318.68	253.13	26.5405	301.15	254.88	26.5405	345.42	269.88
31.9635	20.3704	31.9635	15.68	31.9635	15.5605		25.5545	400	25.5545	441	25.5545	471		26.5572	321.41	253.16	26.5572	303.33	254.91	26.5572	347.12	269.89
31.9833	20.5855	31.9833	15.31	31.9833	15.6684		25.5712	324	25.5712	438	25.5712	428		26.5739	324.69	253.18	26.5739	306.03	254.93	26.5739	349.23	269.89
32.0032	20.8059	32.0032	14.78	32.0032	15.2605		25.588	386	25.588	429	25.588	453		26.5906	328.81	253.21	26.5906	310.06	254.96	26.5906	349.9	269.89
32.023	20.8941	32.023	14.74	32.023	15.3658		25.6047	375	25.6047	392	25.6047	438		26.6073	332.41	253.23	26.6073	314.34	254.98	26.6073	347.37	269.9
32.0428	20.8539	32.0428	15.2	32.0428	15.2211		25.6214	351	25.6214	390	25.6214	411		26.6241	333.51	253.25	26.6241	316.62	255	26.6241	343.58	269.9
32.0627	21.1125	32.0627	15.16	32.0627	15.1711		25.6381	343	25.6381	372	25.6381	430		26.6408	331.68	253.28	26.6408	315.29	255.03	26.6408	340.37	269.9
32.0825	21.7204	32.0825	15.09	32.0825	15.2921		25.6548	367	25.6548	397	25.6548	410		26.6575	329.29	253.3	26.6575	313.32	255.05	26.6575	337.92	269.9
32.1024	21.6809	32.1024	15.2	32.1024	15.3158		25.6715	345	25.6715	376	25.6715	394		26.6742	327.7	253.32	26.6742	312.48	255.08	26.6742	334.73	269.91
32.1222	22.1414	32.1222	15.36	32.1222	15.7342		25.6882	317	25.6882	338	25.6882	404		26.6909	326.35	253.35	26.6909	312.37	255.1	26.6909	331.69	269.91
32.142	22.5507	32.142	15.76	32.142	16.8053		25.7049	366	25.7049	334	25.7049	369		26.7076	324.86	253.37	26.7076	311.77	255.12	26.7076	329.53	269.91
32.1619	22.8849	32.1619	16.34	32.1619	19.6132		25.7217	335	25.7217	334	25.7217	394		26.7243	324.05	253.39	26.7243	311.73	255.15	26.7243	328.09	269.91
32.1817	24.273	32.1817	16.75	32.1817	22.7211		25.7384	334	25.7384	359	25.7384	385		26.741	324.29	253.42	26.741	312.84	255.17	26.741	326.95	269.91
32.2016	26.7697	32.2016	17.69	32.2016	23.8842		25.7551	330	25.7551	330	25.7551	371		26.7578	325.06	253.44	26.7578	314.42	255.19	26.7578	326.05	269.92
32.2214	29.0026	32.2214	18.14	32.2214	23.7974		25.7718	342	25.7718	357	25.7718	387		26.7745	325.8	253.46	26.7745	315.72	255.22	26.7745	325.36	269.92
32.2412	30.3307	32.2412	18.1	32.2412	22.1745		25.7885	317	25.7885	351	25.7885	380		26.7912	326.14	253.48	26.7912	316.34	255.24	26.7912	324.9	269.92
32.2611	31.5391	32.2611	17.92	32.2611	20.263		25.8052	343	25.8052	300	25.8052	384		26.8079	325.86	253.51	26.8079	316.14	255.26	26.8079	324.65	269.92
32.2809	30.1621	32.2809	17.59	32.2809	20.1563		25.8219	360	25.8219	355	25.8219	369		26.8246	324.93	253.53	26.8246	315.21	255.28	26.8246	324.6	269.92
32.3007	28.4629	32.3007	17.3	32.3007	20.1042		25.8386	318	25.8386	322	25.8386	358		26.8413	323.49	253.55	26.8413	313.81	255.31	26.8413	324.75	269.92
32.3206	27.791	32.3206	16.76	32.3206	18.487		25.8553	339	25.8553	319	25.8553	336		26.858	321.76	253.57	26.858	312.21	255.33	26.858	325.07	269.92
32.3404	26.1126	32.3404	16.71	32.3404	16.974		25.8721	364	25.8721	360	25.8721	361		26.8747	319.95	253.59	26.8747	310.6	255.35	26.8747	325.54	269.93
32.3603	25.2194	32.3603	15.74	32.3603	15.4557		25.8888	314	25.8888	291	25.8888	360		26.8914	318.24	253.61	26.8914	309.19	255.37	26.8914	326.15	269.93
32.3801	23.39	32.3801	15.58	32.3801	15.9323		25.9055	315	25.9055	342	25.9055	328		26.9082	316.79	253.64	26.9082	308.07	255.4	26.9082	326.85	269.93
32.3999	22.2358	32.3999	15.43	32.3999	15.8866		25.9222	295	25.9222	338	25.9222	387		26.9249	315.66	253.66	26.9249	307.28	255.42	26.9249	327.6	269.93
32.4198	21.0812	32.4198	15.86	32.4198	15.8582		25.9389	323	25.9389	336	25.9389	322		26.9416	314.86	253.68	26.9416	306.79	255.44	26.9416	328.36	269.93
32.4396	21.3847	32.4396	15.7	32.4396	15.5284		25.9556	333	25.9556	328	25.9556	348		26.9583	314.36	253.7	26.9583	306.53	255.46	26.9583	329.11	269.93
32.4595	20.5805	32.4595	15.62	32.4595	15.5155		25.9723	295	25.9723	301	25.9723	347		26.975	314.06	253.72	26.975	306.4	255.48	26.975	329.83	269.93
32.4793	21.2996	32.4793	15.72	32.4793	15.5825		25.989	311	25.989	310	25.989	333		26.9917	313.91	253.74	26.9917	306.33	255.5	26.9917	330.46	269.93
32.4991	21.3305	32.4991	15.7	32.4991	15.8686		26.0057	325	26.0057	313	26.0057	336		27.0084	313.8	253.76	27.0084	306.25	255.52	27.0084	330.93	269.93
32.519	21.2494	32.519	16.21	32.519	15.8814		26.0224	301	26.0224	324	26.0224	331		27.0251	313.69	253.78	27.0251	306.1	255.54	27.0251	331.21	269.93
32.5388	21.2294	32.5388	15.82	32.5388	15.8582		26.0392	313	26.0392	328	26.0392	342		27.0418	313.51	253.8	27.0418	305.86	255.56	27.0418	331.25	269.93
32.5587	21.4311	32.5587	16.12	32.5587	16.0412		26.0559	304	26.0559	295	26.0559	343		27.0586	313.21	253.82	27.0586	305.48	255.59	27.0586	331	269.93
32.5785	21.4742	32.5785	15.87	32.5785	15.9433		26.0726	328	26.0726	313	26.0726	358		27.0753	312.77	253.84	27.0753	304.95	255.61	27.0753	330.41	269.93
32.5983	22.2384	32.5983	16.1	32.5983	16.116		26.0893	324	26.0893	330	26.0893	357		27.092	312.16	253.86	27.092	304.25	255.63	27.092	329.48	269.93
32.6182	22.201	32.6182	15.77	32.6182	15.7706		26.106	298	26.106	286	26.106	329		27.1087	311.36	253.88	27.1087	303.39	255.65	27.1087	328.21	269.93
32.638	21.674	32.638	16.26	32.638	15.9948		26.1227	318	26.1227	312	26.1227	345		27.1254	310.46	253.9	27.1254	302.46	255.67	27.1254	326.74	269.93
32.6579	21.8512	32.6579	16.54	32.6579	16.0077		26.1394	308	26.1394	322	26.1394	312		27.1421	309.3	253.92	27.1421	301.3	255.69	27.1421	324.91	269.93
32.6777	22.5406	32.6777	16.44	32.6777	15.9716		26.1561	308	26.1561	317	26.1561	342		27.1588	307.98	253.94	27.1588	300.01	255.71	27.1588	322.9	269.93
32.6975	22.3595	32.6975	16.85	32.6975	16.3376		26.1729	310	26.1729	307	26.1729	332		27.1755	306.52	253.96	27.1755	298.63	255.73	27.1755	320.79	269.93
32.7174	22.2558	32.7174	16.55	32.7174	16.4845		26.1896	290	26.1896	310	26.1896	320		27.1922	304.95	253.97	27.1922	297.18	255.74	27.1922	318.66	269.92
32.7372	22.1785	32.7372	16.78	32.7372	15.9897		26.2063	275	26.2063	335	26.2063	340		27.209	303.3	253.99	27.209	295.69	255.76	27.209	316.61	269.92
32.7571	22.6978	32.7571	16.59	32.7571	16.4923		26.223	330	26.223	309	26.223	339		27.2257	301.6	254.01	27.2257	294.17	255.78	27.2257	314.74	269.92
32.7769	22.3918	32.7769	16.55	32.7769	16.1727		26.2397	319	26.2397	294	26.2397	357		27.2424	299.87	254.03	27.2424	292.66	255.8	27.2424	313.18	269.92
32.7967	22.5039	32.7967	16.87	32.7967	16.4175		26.2564	294	26.2564	292	26.2564	346		27.2591	298.14	254.05	27.2591	291.18	255.82	27.2591	312.02	269.92
32.8166	22.4626	32.8166	16.79	32.8166	16.7784		26.2731	310	26.2731	310	26.2731	317		27.2758	296.44	254.07	27.2758	289.74	255.84	27.2758	311.67	269.92
32.8364	22.4936	32.8364	16.45	32.8364	16.6031		26.2898	287	26.2898	320	26.2898	344		27.2925	294.78	254.08	27.2925	288.35	255.86	27.2925	311.79	269.92
32.8562	22.8827	32.8562	16.38	32.8562	16.4253		26.3065	294	26.3065	289	26.3065	338		27.3092	293.2	254.1	27.3092	287.04	255.88	27.3092	311.43	269.91
32.8761	22.8093	32.8761	17	32.8761	16.7165		26.3233	327	26.3233	280	26.3233	330		27.3259	291.69	254.12	27.3259	285.8	255.89	27.3259	309.7	269.91
32.8959	23.4948	32.8959	16.4	32.8959	16.482		26.34	319	26.34	286	26.34	345		27.3426	290.27	254.14	27.3426	284.65	255.91	27.3426	307.91	269.91
32.9158	23.1024	32.9158	16.74	32.9158	16.7758		26.3567	301	26.3567	307	26.3567	334		27.3593	288.95	254.15	27.3593	283.59	255.93	27.3593	306.92	269.91
32.9356	23.4652	32.9356	16.8	32.9356	17.0876		26.3734	314	26.3734	292	26.3734	344		27.3761	287.74	254.17	27.3761	282.62	255.95	27.3761	306.64	269.91
32.9554	23.683	32.9554	17.1	32.9554	17.4566		26.3901	290	26.3901	279	26.3901	335		27.3928	286.64	254.19	27.3928	281.75	255.97	27.3928	306.35	269.9
32.9753	24.3227	32.9753	17.66	32.9753	17.8571		26.4068	306	26.4068	309	26.4068	321		27.4095	285.65	254.2	27.4095	280.96	255.98	27.4095	306.59	269.9
32.9951	25.3622	32.9951	18.37	32.9951	19.1071		26.4235	312	26.4235	301	26.4235	370		27.4262	284.78	254.22	27.4262	280.27	256	27.4262	307.74	269.9
33.015	26.0364	33.015	19.01	33.015	19.7398		26.4402	283	26.4402	325	26.4402	313		27.4429	284.01	254.24	27.4429	279.68	256.02	27.4429	309.65	269.9
33.0348	26.2526	33.0348	19.41	33.0348	19.6224		26.4569	320	26.4569	293	26.4569	331		27.4596	283.36	254.25	27.4596	279.17	256.03	27.4596	311.86	269.89
33.0546	25.9739	33.0546	20.34	33.0546	19.4311		26.4736	289	26.4736	320	26.4736	309		27.4763	282.81	254.27	27.4763	278.75	256.05	27.4763	313.81	269.89
33.0745	26.1837	33.0745	20.24	33.0745	19.5934		26.4904	335	26.4904	318	26.4904	320		27.493	282.38	254.29	27.493	278.41	256.07	27.493	314.87	269.89
33.0943	26.3359	33.0943	19.77	33.0943	19.5732		26.5071	325	26.5071	288	26.5071	333		27.5097	282.05	254.3	27.5097	278.16	256.09	27.5097	314.7	269.89
33.1142	25.6338	33.1142	19.51	33.1142	19.4318		26.5238	304	26.5238	319	26.5238	325		27.5265	281.82	254.32	27.5265	277.99	256.1	27.5265	313.52	269.88
33.134	25.0215	33.134	19.56	33.134	18.5833		26.5405	292	26.5405	310	26.5405	300		27.5432	281.69	254.33	27.5432	277.9	256.12	27.5432	311.85	269.88
33.1538	24.9899	33.1538	18.87	33.1538	18.2197		26.5572	327	26.5572	288	26.5572	322		27.5599	281.67	254.35	27.5599	277.89	256.13	27.5599	310.09	269.88
33.1737	24.3056	33.1737	18.32	33.1737	17.8258		26.5739	319	26.5739	310	26.5739	349		27.5766	281.74	254.37	27.5766	277.96	256.15	27.5766	308.47	269.87
33.1935	23.7955	33.1935	17.74	33.1935	17.3333		26.5906	303	26.5906	319	26.5906	374		27.5933	281.92	254.38	27.5933	278.11	256.17	27.5933	307.22	269.87
33.2134	22.9198	33.2134	17.38	33.2134	17.5076		26.6074	332	26.6074	351	26.6074	342		27.61	282.19	254.4	27.61	278.33	256.18	27.61	306.58	269.87
33.2332	23.2475	33.2332	17.24	33.2332	17.053		26.6241	332	26.6241	316	26.6241	327		27.6267	282.57	254.41	27.6267	278.63	256.2	27.6267	306.69	269.86
33.253	23.2153	33.253	16.64	33.253	16.7652		26.6408	382	26.6408	297	26.6408	347		27.6434	283.05	254.43	27.6434	279.01	256.21	27.6434	307.56	269.86
33.2729	22.9432	33.2729	17.37	33.2729	16.7273		26.6575	320	26.6575	306	26.6575	328		27.6602	283.64	254.44	27.6602	279.48	256.23	27.6602	309.09	269.85
33.2927	22.8687	33.2927	16.87	33.2927	16.8131		26.6742	308	26.6742	333	26.6742	371		27.6769	284.34	254.45	27.6769	280.02	256.24	27.6769	311.07	269.85
33.3126	22.7045	33.3126	16.96	33.3126	16.7828		26.6909	329	26.6909	302	26.6909	346		27.6936	285.15	254.47	27.6936	280.66	256.26	27.6936	313.18	269.85
33.3324	23.1035	33.3324	16.96	33.3324	16.6465		26.7076	337	26.7076	317	26.7076	323		27.7103	286.08	254.48	27.7103	281.37	256.27	27.7103	314.93	269.84
33.3522	22.7538	33.3522	16.59	33.3522	17.1187		26.7243	311	26.7243	297	26.7243	328		27.727	287.13	254.5	27.727	282.18	256.29	27.727	315.91	269.84
33.3721	22.6723	33.3721	16.71	33.3721	16.7828		26.741	304	26.741	331	26.741	319		27.7437	288.31	254.51	27.7437	283.09	256.3	27.7437	316.08	269.83
33.3919	22.4994	33.3919	16.82	33.3919	16.7753		26.7578	301	26.7578	290	26.7578	316		27.7604	289.63	254.52	27.7604	284.1	256.32	27.7604	315.75	269.83
33.4117	22.6212	33.4117	16.84	33.4117	16.7702		26.7745	292	26.7745	312	26.7745	340		27.7771	291.09	254.54	27.7771	285.21	256.33	27.7771	315.3	269.82
33.4316	22.9444	33.4316	16.69	33.4316	16.5783		26.7912	297	26.7912	311	26.7912	351		27.7939	292.72	254.55	27.7939	286.43	256.35	27.7939	314.92	269.82
33.4514	22.5177	33.4514	16.8	33.4514	16.5354		26.8079	313	26.8079	291	26.8079	348		27.8106	294.5	254.57	27.8106	287.78	256.36	27.8106	314.71	269.81
33.4713	23.0543	33.4713	16.62	33.4713	16.9621		26.8246	278	26.8246	344	26.8246	358		27.8273	296.47	254.58	27.8273	289.25	256.37	27.8273	314.83	269.81
33.4911	23.2891	33.4911	16.75	33.4911	16.7525		26.8413	286	26.8413	302	26.8413	317		27.844	298.63	254.59	27.844	290.86	256.39	27.844	315.42	269.8
33.5109	22.4564	33.5109	16.71	33.5109	17.1136		26.858	312	26.858	289	26.858	325		27.8607	300.99	254.6	27.8607	292.62	256.4	27.8607	316.5	269.8
33.5308	23.0865	33.5308	16.97	33.5308	17.2172		26.8747	309	26.8747	304	26.8747	293		27.8774	303.58	254.62	27.8774	294.55	256.41	27.8774	318.03	269.79
33.5506	23.3523	33.5506	17.07	33.5506	16.6667		26.8914	322	26.8914	284	26.8914	339		27.8941	306.41	254.63	27.8941	296.67	256.43	27.8941	319.96	269.79
33.5705	23.0158	33.5705	17.02	33.5705	17.1035		26.9081	317	26.9081	289	26.9081	346		27.9108	309.51	254.64	27.9108	298.98	256.44	27.9108	322.24	269.78
33.5903	23.1155	33.5903	17.1	33.5903	16.7879		26.9249	321	26.9249	294	26.9249	325		27.9275	312.9	254.66	27.9275	301.52	256.45	27.9275	324.9	269.78
33.6101	23.1585	33.6101	17.1	33.6101	16.5025		26.9416	295	26.9416	314	26.9416	300		27.9442	316.6	254.67	27.9442	304.31	256.47	27.9442	327.97	269.77
33.63	23.6812	33.63	17.51	33.63	17.303		26.9583	289	26.9583	297	26.9583	361		27.961	320.64	254.68	27.961	307.37	256.48	27.961	331.51	269.77
33.6498	23.0206	33.6498	17.17	33.6498	17.4731		26.975	295	26.975	263	26.975	346		27.9777	325.06	254.69	27.9777	310.75	256.49	27.9777	335.72	269.76
33.6697	23.6231	33.6697	17.13	33.6697	17.625		26.9917	312	26.9917	281	26.9917	322		27.9944	329.89	254.7	27.9944	314.47	256.5	27.9944	340.75	269.76
33.6895	23.4575	33.6895	17.49	33.6895	17.4388		27.0084	307	27.0084	286	27.0084	363		28.0111	335.18	254.71	28.0111	318.57	256.52	28.0111	345.9	269.75
33.7093	23.8588	33.7093	17.7	33.7093	17.9181		27.0251	312	27.0251	320	27.0251	312		28.0278	340.97	254.73	28.0278	323.11	256.53	28.0278	350.4	269.74
33.7292	24.2661	33.7292	17.2	33.7292	17.5922		27.0418	295	27.0418	276	27.0418	335		28.0445	346.76	254.74	28.0445	327.67	256.54	28.0445	354	269.74
33.749	23.7358	33.749	17.54	33.749	17.3818		27.0586	281	27.0586	312	27.0586	339		28.0612	353.67	254.75	28.0612	333.17	256.55	28.0612	358.67	269.73
33.7689	23.4394	33.7689	17.38	33.7689	16.6986		27.0753	304	27.0753	284	27.0753	281		28.0779	361.24	254.76	28.0779	339.24	256.56	28.0779	364.39	269.73
33.7887	23.7853	33.7887	17.16	33.7887	17.4059		27.092	311	27.092	310	27.092	340		28.0947	369.54	254.77	28.0947	345.96	256.58	28.0947	370.51	269.72
33.8085	23.9134	33.8085	17.8	33.8085	17.0111		27.1087	278	27.1087	279	27.1087	316		28.1114	378.63	254.78	28.1114	353.37	256.59	28.1114	377	269.71
33.8284	23.5297	33.8284	16.78	33.8284	16.9957		27.1254	284	27.1254	287	27.1254	321		28.1281	388.59	254.79	28.1281	361.56	256.6	28.1281	384.26	269.71
33.8482	23.3379	33.8482	16.96	33.8482	17.3793		27.1421	276	27.1421	282	27.1421	331		28.1448	399.49	254.8	28.1448	370.56	256.61	28.1448	392.5	269.7
33.8681	23.6101	33.8681	16.94	33.8681	17.1238		27.1588	278	27.1588	306	27.1588	332		28.1615	411.4	254.81	28.1615	380.45	256.62	28.1615	401.55	269.69
33.8879	23.7153	33.8879	17.36	33.8879	16.8298		27.1755	285	27.1755	287	27.1755	317		28.1782	424.38	254.82	28.1782	391.29	256.63	28.1782	411.37	269.69
[truncated: 3,161 more rows]

## Sheet: KM - Deadfall Lake
Bulk Soil Observed Pattern (Cu Kα)							Clay-Size Fraction Observed Patterns							Clay-Size Fraction Rietveld Fits
[truncated: 4,670 more rows]

## Sheet: KM - Swift Creek Late
Bulk Soil Observed Pattern (Cu Kα)									Clay-Size Fraction Observed Patterns (Co Kα)							Clay-Size Fraction Rietveld Fits
[truncated: 4,670 more rows]

[truncated: 4 more sheets: KM - Swift Creek Middle, KM - String Bean Creek, Tablelands, Pickhandle Gulch]
