# Supplementary material for: Fe-rich X-ray amorphous material records past climate and persistence of water on Mars
Source: Commun Earth Environ. 2024 Jul 7;5(1):364. doi: 10.1038/s43247-024-01495-4 (PMC11227439; doi:10.1038/s43247-024-01495-4)
Supplement: Supplementary file 5 — Data Set 2 [file 43247_2024_1495_MOESM5_ESM.xlsx]

## Sheet: Selective Diss. Results (AA)
Location	Soil Pit	Sample	Depth (cm)	Total Concentration (mg/g)				Ratios
				FeH	FeD	FeP	SiH	FeH/FeD	FeH:SiH
Klamath Mountains	Eunice Bluff	EB1	1.5	9.38937	32.7882	0.5205	8.51999	0.286365	1.10204
		EB2	8	8.28606	36.8087	0.436091	5.56215	0.225112	1.48972		Comments
		EB3	18	8.00057	33.5656	0.44049	6.44844	0.238356	1.2407		FeH: Hydroxylamine Hydrochloride Extractable Fe, "amorphous Fe"
		EB4	28	9.53565	34.8928	0.388733	8.50717	0.273284	1.1209		FeD: Dithionite Extractable Fe, "Fe in Oxides and Oxyhydroxides"
		EB5	38	6.96042	32.2834	0.31724	4.51817	0.215604	1.54054		FeP: Pyrophosphate Extractable Fe, "organically bound Fe"
		EB6	53	6.52876	30.8741	0.204845	5.14839	0.211464	1.26812		SiH: Hydroxylamine Hydrochloride Extractable Si, "measure of some amount of Si content from amorphous material"
		Mean		8.11681	33.5354	0.38465	6.45072	0.241697	1.29367
		St. Dev.		1.2275	2.08644	0.110553	1.71646	0.031222	0.184072
		Parent Material		6.82073	2.57629		3.79243	2.6475	1.79851
	Deadfall Lake	DfL1	3.5	7.46165	18.2863	0.926202	4.82066	0.408046	1.54785
		DfL2	12	7.31951	20.4481	0.696548	5.53272	0.357956	1.32295
		DfL3	22	6.99982	21.3815	0.447539	4.38929	0.327378	1.59475
		DfL4	32	6.19877	19.9933	0.379249	5.34208	0.310042	1.16036
		DfL5	42	5.88056	16.9268	0.435621	4.20526	0.347411	1.39838
		DfL6	50	5.30609	15.2308	0.261872	4.4108	0.348379	1.20298
		Mean		6.52773	18.7111	0.524505	4.78347	0.349869	1.37121
		St. Dev.		0.865036	2.33532	0.242841	0.548341	0.0333173	0.177199
		Parent Material		1.65447	2.22506		0.531276	0.743565	3.11415
	Swift Creek Late	SCL1	2.5	3.36136	16.8204	0.830552	2.50523	0.199839	1.34173
		SCL2	10.5	3.03069	17.6005	1.15737	2.8793	0.172193	1.05258
		SCL3	24.5	2.35146	20.9017	0.868304	2.87104	0.112501	0.819025
		SCL4	44.5	2.7668	21.7862	0.841105	2.92535	0.126998	0.945801
		SCL5	61.5	2.61276	19.9545	0.809929	3.33042	0.130936	0.784515
		SCL6	76	3.07651	21.2797	0.65992	4.0268	0.144575	0.764008
		Mean		2.8666	19.7238	0.861197	3.08969	0.14784	0.951277
		St. Dev.		0.362088	2.05199	0.162637	0.528543	0.0324858	0.220508
		Parent Material		8.39571	2.22624		16.5838	3.77125	0.506261
	Swift Creek Middle	SCM1	3	3.7367	26.4409	0.857019	4.00598	0.141323	0.932782
		SCM2	9.5	2.4355	19.2472	0.382352	3.18511	0.126538	0.764652
		SCM3	18	2.4384	20.4799	0.44179	3.32076	0.119063	0.734288
		SCM4	43	1.90503	20.0978	0.299508	3.38172	0.0947877	0.56333
		SCM5	75.5	3.18962	21.1218	0.318544	3.93454	0.151011	0.810672
		SCM6	98	2.57689	13.6907	0.232764	3.65525	0.188222	0.704983
		Mean		2.71369	20.1797	0.421996	3.58056	0.136824	0.751784
		St. Dev.		0.647903	4.07834	0.224821	0.339196	0.0317854	0.121988
		Parent Material		10.97	0.988349		18.0914	11.0993	0.606362
	String Bean Creek	SBC1	5	15.9555	15.5081	0.516882	8.93025	1.02885	1.78668
		SBC2	15	10.7466	21.7625	0.486392	4.97087	0.493814	2.16192
		SBC3	25	11.1762	21.1737	0.356027	4.55526	0.527836	2.45348
		SBC4	35	11.0548	22.3713	0.331066	4.71759	0.494153	2.34333
		SBC5	45	15.7513	19.1814	0.408577	11.7412	0.821176	1.34154
		SBC6	55	10.9787	17.8618	0.204039	6.35103	0.614649	1.72866
		SBC7	65	12.6523	19.808	0.366128	5.62544	0.638747	2.24912
		SBC8	75	11.0931	17.2177	0.183269	6.30111	0.644288	1.76051
		SBC9	85	9.83223	16.3952	0.14804	5.16564	0.599703	1.90339
		SBC10	95	9.5057	14.6709	0.214363	4.44934	0.64793	2.13643
		SBC11	115	6.02276	10.3735	0.422552	6.17038	0.580592	0.976076
		Mean		11.3427	17.8476	0.330667	6.27073	0.644703	1.89465
		St. Dev.		2.77574	3.5554	0.126483	2.21396	0.156488	0.444537
		Parent Material		8.67491	7.46377		2.03004	1.16227	4.27328
Tablelands	Devil's Punchbowl	DvP1	5	24.2106	20.6538	0.191029	10.94	1.17221	2.21304
		DvP2	15	21.5831	22.6085	0.165055	6.43768	0.954649	3.35263
		DvP3	27.5	21.8915	21.4676	0.138763	6.58581	1.01975	3.32404
		DvP4	42.5	22.5867	20.623	0.107394	7.38637	1.09522	3.05789
		Mean		22.568	21.3382	0.15056	7.83746	1.06046	2.9869
		St. Dev.		1.17278	0.932785	0.035825	2.10991	0.0940761	0.532703
	Winterhouse Gulch Canyon	WHGC1	5.5	29.631	19.9109	0.147336	6.2425	1.48818	4.74666
		WHGC2	15.5	29.2009	20.7921	0.147306	7.36949	1.40442	3.9624
		WHGC3	27.5	28.0235	21.253	0.139587	7.00852	1.31857	3.99849
		WHGC4	42.5	24.6226	11.8537	0.0986707	5.55764	2.07722	4.43041
		Mean		27.8695	18.4524	0.133225	6.54454	1.5721	4.28449
		St. Dev.		2.26873	4.43426	0.0233229	0.808499	0.343793	0.374357
	Winterhouse Gulch Mouth	WHGM1	2	30.5193	25.5553	0.30174	8.46245	1.19424	3.60644
		WHGM2	10	26.9955	21.1591	0.206812	8.08177	1.27583	3.34029
		WHGM3	38	24.4329	18.777	0.136841	6.40174	1.30121	3.81661
		WHGM4	65	25.8571	18.7584	0.114255	5.86863	1.37843	4.40598
		Mean		26.9512	21.0625	0.189912	7.20365	1.28743	3.79233
		St. Dev.		2.59949	3.20037	0.0843237	1.26241	0.0759134	0.453157
	Trout River Gulch	TRG1	5	25.6015	25.3045	0.154136	11.2109	1.01174	2.28363
		TRG2	20	27.761	23.0233	0.16292	6.26024	1.20578	4.43449
		TRG3	40	26.3058	18.3704	0.142782	7.10094	1.43197	3.70455
		TRG4	60	23.1111	17.0216	0.126036	7.22866	1.35775	3.19715
		Mean		25.6949	20.9299	0.146469	7.95018	1.25181	3.40496
		St. Dev.		1.94309	3.8878	0.015922	2.21584	0.185683	0.903745
	Overall Averages	Mean		25.7709	20.4458	0.155041	7.38396	1.29295	3.61717
		St. Dev.		2.77384	3.2579	0.0481083	1.63056	0.262888	0.730807
	Parent Material			12.1081	10.8647		1.93912	1.11444	6.24409
Pickhandle Gulch	Summit	PGR1	3	1.11495	3.76388	0.01765	4.05238	0.296223	0.275133
		PGR2	10	1.03398	2.64095	0.0143361	2.70229	0.391516	0.382629
	Footslope 1	PGF1-1	2	1.24485	3.59153	0.0262582	3.95258	0.346608	0.314947
		PGF1-2	7	1.37829	4.13869	0.0231392	4.69116	0.333025	0.293805
	Footslope 2	PGF2-1	2	1.60547	3.05808	0.0235482	3.82444	0.524993	0.419792
		PGF2-2	6	1.28946	3.57191	0.0220605	2.60956	0.361	0.494128
	Overall Averages	Mean		1.27783	3.46084	0.0211654	3.63874	0.375561	0.363406
		St. Dev.		0.202316	0.532006	0.00436599	0.818267	0.0796724	0.0844059
	Parent Material			1.37013	1.65798		0.745635	0.826384	1.83753

## Sheet: Clay-Size Bulk Diss. (ICPMS)
			Major Chemical Constituents																Trace Metals
Soil	Sample	Depth (cm)	Na2O (wt%)	Al2O3 (wt%)	CaO (wt%)	Fe2O3 T (wt%)	K2O (wt%)	MgO (wt%)	P2O5 (wt%)	TiO2 (wt%)	MnO (wt%)	Cr2O3 (wt%)	NiO (wt%)	LOI950 (wt.%)	SiO2 (wt%)		Sample	Depth	Sc (ppm)	V (ppm)	Rb (ppm)	Sr (ppm)	Y (ppm)	Zr (ppm)	Nb (ppm)	Ba (ppm)	La (ppm)	Ce (ppm)	Pr (ppm)	Nd (ppm)	Sm (ppm)	Eu (ppm)	Gd (ppm)	Tb (ppm)	Dy (ppm)	Ho (ppm)	Er (ppm)	Tm (ppm)	Yb (ppm)	Lu (ppm)	Hf (ppm)	Ta (ppm)	Pb (ppm)	Th (ppm)	U (ppm)
Devil's Punchbowl	DvP1	5	nm	1.75758	0.180053	15.7079	0.126387	21.4813	0.109573	0.0688694	0.33344	2.67704	3.87066	21.8878	31.7994		DvP1	5	20.6739	60.448	5.8905	9.32844	2.52702	7.21634	1.20305	34.5913	2.49422	4.88484	0.653521	2.46052	0.478277	0.101574	0.438949	0.0652111	0.387092	0.0779196	0.226394	0.0406625	0.26177	0.042288	0.194702	0.0910544	24.2778	0.560334	0.309689
	DVP2	15	nm	1.34026	0.120786	13.0723	0.0847112	16.957	0.0707745	0.0519206	0.301196	2.10474	3.16435	21.3736	41.3584		DVP2	15	16.7092	50.2645	3.87204	6.50767	2.61066	4.81373	0.919556	24.5105	2.21599	4.91611	0.602913	2.30661	0.477552	0.0951694	0.430473	0.0676412	0.386138	0.0810354	0.21373	0.0384451	0.256302	0.0430831	0.137108	0.065604	3.34386	0.560476	0.213979
	DVP3	27.5	nm	1.35568	0.11249	15.4288	0.0824585	18.807	0.0857207	0.0547056	0.331753	2.36481	3.54229	22.27	35.5643		DVP3	27.5	19.2445	56.1465	4.10036	6.09189	2.47134	4.91439	0.91499	24.9626	2.29102	4.61592	0.648542	2.47762	0.506894	0.107059	0.437938	0.0699935	0.378307	0.0788266	0.225096	0.0388951	0.254526	0.0432669	0.141043	0.0678947	7.642	0.482082	0.20669
	DVP4	42.5	nm	1.46965	0.140342	15.3325	0.0959425	19.9411	0.0865219	0.0601385	0.351708	2.3703	3.33153	19.0162	37.8041		DVP4	42.5	20.3361	58.6342	4.61956	7.75543	3.02383	5.95519	1.04136	27.5031	2.68267	5.92173	0.700038	2.73265	0.552563	0.111467	0.484044	0.0735839	0.434492	0.0890014	0.257731	0.0438329	0.292352	0.0468525	0.160514	0.0765532	3.96796	0.672759	0.154331
Winterhouse Gulch Canyon	WHGC1	2	nm	1.90307	0.139829	22.4968	0.134093	31.4873	0.149091	0.0715651	0.355759	2.39732	4.2093	16.89	19.7658		WHGC1	2	24.982	54.5924	6.9418	9.03996	3.64903	8.17597	1.34744	44.1041	3.67831	7.07081	0.959307	3.67733	0.744863	0.143818	0.652026	0.101751	0.585495	0.123326	0.328183	0.0547957	0.341922	0.058571	0.218355	0.094708	13.335	1.0719	0.255989
	WHGC2	10	nm	1.60818	0.127888	18.0253	0.116658	25.9865	0.107525	0.0623896	0.28116	2.0038	3.36338	20.8717	27.4455		WHGC2	10	20.0881	44.447	5.91429	8.13779	2.92588	7.46626	1.17004	38.9851	3.02806	5.71098	0.769773	2.9861	0.591585	0.114921	0.53133	0.0780915	0.483795	0.0954692	0.26603	0.044556	0.284872	0.0456368	0.205604	0.0808756	8.83866	0.887556	0.261471
	WHGC3	38	nm	1.63789	0.128874	17.7529	0.127806	26.1185	0.0949387	0.0654956	0.283418	2.03409	3.1989	21.5957	26.9615		WHGC3	38	20.7989	44.9098	6.12902	8.12313	2.955	7.15347	1.23486	40.9487	3.1285	5.8256	0.804506	3.07399	0.592162	0.122084	0.534346	0.0790406	0.487531	0.0946124	0.263307	0.045429	0.277528	0.0448194	0.199557	0.083148	2.46503	0.905049	0.245958
	WHGC4	65	nm	1.80707	0.146071	13.964	0.19975	30.16	0.0471477	0.0924163	0.442347	1.72239	2.87756	16.1552	32.3861		WHGC4	65	15.7223	37.3909	7.79353	8.83547	3.42371	10.182	1.5953	50.2649	3.99141	9.06936	1.03044	3.94017	0.776364	0.157028	0.641545	0.0994499	0.565326	0.115317	0.32499	0.0555622	0.317443	0.0542266	0.281094	0.112171	2.64751	1.04612	0.180295
Winterhouse Gulch Mouth	WHGM1	5.5	nm	1.47307	0.107814	15.7236	0.181746	24.913	0.115124	0.0601155	0.235736	1.94457	3.0429	27.12	25.0823		WHGM1	5.5	16.5279	56.9266	6.96317	8.89177	1.37205	71.9495	1.226	48.9313	1.85328	4.45093	0.482863	1.74753	0.319257	0.0688971	0.275954	0.0422041	0.229096	0.0451384	0.139443	0.0245666	0.142546	0.0246292	1.59012	0.0932475	84.0056	0.456654	0.289763
	WHGM2	15.5	nm	1.39258	0.23686	19.4309	0.172859	36.5844	0.105482	0.0448313	0.398467	2.14365	3.48164	17.4683	18.54		WHGM2	15.5	20.9182	48.0307	5.66456	8.9904	1.72849	5.47973	0.872146	34.462	1.9259	4.76581	0.468385	1.74956	0.337842	0.0720528	0.295277	0.0425518	0.269079	0.0558598	0.161803	0.0298608	0.20853	0.0379724	0.149149	0.0627865	14.525	0.655772	0.218786
	WHGM3	27.5	nm	0.734127	0.0865361	12.865	0.0749246	20.2113	0.0505445	0.0299563	0.430716	1.34798	2.95031	18.62	42.5986		WHGM3	27.5	13.6924	32.7372	3.36592	6.63725	0.82945	2.92922	0.587897	24.225	0.982764	2.92487	0.249863	0.989368	0.187817	0.0368259	0.156389	0.0241537	0.139421	0.0291568	0.0832282	0.0157753	0.101731	0.017822	0.08912	0.0420757	1.98324	0.264471	0.144737
	WHGM4	42.5	nm	0.828868	0.090649	13.6513	0.0779354	21.2633	0.0518441	0.0320119	0.451327	1.36456	2.99529	17.8972	41.2958		WHGM4	42.5	15.1886	33.392	3.29371	6.359	0.893678	2.9978	0.602872	24.9767	1.14604	3.03172	0.294521	1.11441	0.219506	0.0406133	0.172462	0.0244881	0.153649	0.029583	0.0952398	0.0171891	0.113889	0.0196972	0.0821487	0.0445362	1.41084	0.307855	0.032652
Trout River Gulch	TRG1	5	nm	2.01401	0.162049	18.2707	0.201428	25.199	0.0658916	0.0823873	0.345315	1.67817	3.07436	18.1228	30.7839		TRG1	5	19.7352	47.8924	9.81809	12.5573	2.84302	10.0747	1.51204	55.7959	4.09621	8.89947	0.989804	3.71625	0.677218	0.14485	0.569825	0.0876861	0.490976	0.0992615	0.283223	0.0455411	0.29932	0.0488817	0.286739	0.106491	15.6616	1.21148	0.217531
	TRG2	20	nm	1.75331	0.0948598	14.9263	0.186928	22.7985	0.0477516	0.0609341	0.247919	1.29896	2.56138	19.7021	36.3211		TRG2	20	16.4812	37.2802	10.6483	5.72012	2.19117	6.84654	1.1166	45.469	3.09288	6.10399	0.771782	2.81138	0.514565	0.108466	0.428931	0.0649404	0.365043	0.076607	0.209986	0.0384173	0.241302	0.0365867	0.188691	0.0799831	3.09494	0.980683	0.0817278
	TRG3	40	nm	1.88439	0.0982656	15.4207	0.214816	26.7609	0.0584938	0.0685028	0.312713	1.30888	2.82405	20.4959	30.5524		TRG3	40	17.3727	37.113	11.1244	6.31134	2.53289	7.46519	1.28384	52.1028	3.7049	7.8394	0.903719	3.34677	0.624225	0.116398	0.504994	0.0769755	0.408357	0.088012	0.242847	0.0432923	0.2679	0.0417628	0.227395	0.0958001	4.42985	1.1492	0.280628
	TRG4	60	nm	2.20908	0.108991	14.5211	0.271292	29.2379	0.0550926	0.0756207	0.319099	1.32264	2.94153	17.7229	31.2147		TRG4	60	16.4222	37.7596	13.2869	7.2352	2.62013	8.55997	1.40754	58.4025	3.83092	8.2825	0.936119	3.37829	0.606295	0.123029	0.506506	0.0756379	0.419941	0.0832459	0.244138	0.043944	0.276665	0.0399081	0.227445	0.0951535	3.96059	1.14367	0.167358
Eunice Bluff	EB1	1.5	nm	6.24657	0.513681	18.6061	0.282961	14.6843	0.232708	0.303646	0.169312	2.23605	2.43861	20.7199	33.5661		EB1	1.5	13.0844	117.885	25.9326	19.6214	5.94928	32.8919	3.36819	86.4043	4.48635	9.33875	1.13435	4.41535	0.979731	0.244688	0.924337	0.159215	0.967895	0.206012	0.586751	0.102733	0.619667	0.0977511	0.934294	0.276859	12.2903	1.80376	0.562158
	EB2	8	nm	7.98974	0.492312	19.4694	0.267121	16.9068	0.183624	0.316532	0.138066	2.30131	2.4399	20.7217	28.7735		EB2	8	18.0278	121.242	22.6358	17.7656	7.15749	35.1747	3.33159	74.8907	4.98093	9.29247	1.27399	5.0162	1.12906	0.282742	1.1031	0.186921	1.11864	0.248492	0.695397	0.119133	0.730935	0.116358	1.01439	0.267083	4.6529	1.95997	0.739303
	EB3	18	nm	6.53072	0.427486	18.546	0.194468	16.7178	0.14347	0.266571	0.133157	2.15182	2.32985	19.836	32.7226		EB3	18	16.7275	114.531	16.5909	12.5869	5.9948	31.5658	2.52425	56.2312	3.75743	7.55433	0.982197	3.88698	0.89003	0.232069	0.895694	0.152181	0.948608	0.212366	0.603766	0.102722	0.652034	0.102721	0.907736	0.208456	3.17658	1.77742	0.563489
	EB4	28	nm	7.87326	0.400069	20.4436	0.198459	17.6416	0.150383	0.301997	0.150848	2.27417	2.79333	19.568	28.2043		EB4	28	22.2494	128.369	16.9024	12.5253	6.15587	40.6581	2.78744	63.4746	3.75721	8.65776	0.990614	3.95218	0.889074	0.244291	0.900093	0.165398	1.03098	0.219851	0.626467	0.116144	0.714026	0.108753	1.15701	0.224834	3.6024	2.23585	0.714974
	EB5	38	nm	7.89668	0.639897	20.7545	0.158042	24.0401	0.11424	0.257724	0.178924	2.42541	3.07979	19.0262	21.4285		EB5	38	35.4272	133.977	9.3094	8.64963	6.78381	30.0434	1.70014	41.9317	3.13369	8.30424	0.926296	3.70103	0.919125	0.257722	0.979521	0.181025	1.13201	0.257406	0.71033	0.132042	0.793431	0.118133	0.862558	0.142804	3.47805	1.59298	0.692885
	EB6	53	nm	6.33575	0.518516	19.1414	0.164413	20.9704	0.112935	0.237175	0.162972	2.21345	2.93265	18.8362	28.3741		EB6	53	25.8346	125.839	9.25958	7.16021	6.42167	28.6358	1.60344	39.0309	3.00001	7.92302	0.870155	3.54165	0.900567	0.244612	0.931676	0.172402	1.07725	0.244131	0.68587	0.118059	0.747852	0.114511	0.811849	0.129806	2.9429	1.47202	0.606491
Deadfall Lake	DFL1	3.5	nm	8.01242	0.906522	17.5837	0.31067	16.2846	0.584782	0.275108	0.294037	1.36319	2.94176	31.7571	19.6861		DFL1	3.5	13.4282	98.2381	28.6852	26.8145	13.0773	30.4281	2.9832	84.1216	4.66547	10.1187	1.30953	5.56636	1.44363	0.411973	1.65296	0.28586	1.6919	0.39981	1.13105	0.195325	1.25595	0.208517	0.969268	0.245426	17.9582	1.48388	0.583611
	DFL2	12	nm	11.668	0.868938	21.8232	0.384352	20.2882	0.440242	0.332362	0.228597	1.46347	3.50608	25.8174	13.1791		DFL2	12	17.3416	112.926	27.1282	25.1462	16.4565	52.4872	3.77586	87.4411	5.89517	11.3424	1.65896	6.90415	1.73566	0.500123	1.97921	0.340345	2.07912	0.492001	1.40637	0.235203	1.49546	0.247365	1.41994	0.299379	15.2943	2.22435	0.728391
	DFL3	22	nm	11.6351	0.907366	20.6497	0.317452	22.3819	0.386445	0.312246	0.209305	1.46601	3.6878	23.2693	14.7773		DFL3	22	21.654	106.115	22.5581	24.5453	32.0615	165.515	3.32899	76.9173	6.58752	11.1622	2.00118	9.03875	2.50609	0.78437	3.36693	0.577471	3.70308	0.874828	2.61662	0.444014	2.81644	0.488208	3.98022	0.284023	6.70825	2.3445	0.691349
	DFL4	32	nm	7.80383	0.674975	13.6323	0.159211	15.2777	0.275702	0.204436	0.137427	1.06613	2.71169	24.3376	33.719		DFL4	32	17.5709	74.3924	14.0313	14.8909	32.6716	27.8882	2.03212	44.207	3.58047	6.16937	1.25306	6.1039	2.03703	0.687411	3.02907	0.546058	3.63099	0.895623	2.67123	0.470361	2.95473	0.519928	0.830199	0.166144	4.51843	1.09087	0.474374
	DFL5	42	nm	7.36142	0.766873	13.1644	0.170842	17.6581	0.256552	0.226194	0.140185	1.0784	2.98013	23.373	32.8239		DFL5	42	14.4395	74.6289	14.6978	18.3617	26.9967	32.9959	2.25533	52.6707	4.15844	8.90711	1.33725	6.11398	1.85446	0.596423	2.54127	0.472479	3.14827	0.766749	2.29997	0.408767	2.51707	0.433638	0.975579	0.18911	6.75346	1.65264	0.487907
	DFL6	50	nm	5.71333	0.919235	11.6117	0.146687	15.7809	0.20793	0.22151	0.13687	1.05734	3.3285	25.4724	35.4036		DFL6	50	13.2394	70.9693	10.7793	19.097	29.6642	36.9741	2.11877	46.8922	3.45264	9.18793	1.18059	5.52608	1.77229	0.601272	2.62736	0.478803	3.36683	0.812378	2.54934	0.434231	2.80761	0.476948	1.06433	0.177537	4.783	1.33691	0.447092
Swift Creek Late	SCL1	2.5	1.40802	5.30703	0.755843	15.9523	0.34296	5.73152	0.70161	0.418693	0.369882	1.96	2.03	40.5762	25.8539		SCL1	2.5	8.64023	126.155	54.3781	25.6026	4.92708	29.4234	4.57693	165.432	5.35317	12.5772	1.18087	4.47553	0.872777	0.223316	0.84909	0.132783	0.85168	0.178271	0.510987	0.0777097	0.521162	0.081364	0.827447	0.342658	58.7616	2.47289	0.597848
	SCL2	10.5	1.55477	3.56271	0.772427	14.1864	0.309982	4.02512	0.647361	0.418812	0.297499	2.06	2.17	35.5507	35.999		SCL2	10.5	7.14816	121.32	31.295	27.8613	6.06868	33.6379	4.6176	170.472	6.17441	15.5645	1.41715	5.42572	1.11656	0.285522	1.06925	0.176863	1.10421	0.219922	0.635239	0.0967797	0.641902	0.0960171	0.959483	0.34054	8.4397	2.49036	0.749246
	SCL3	24.5	0.932533	8.45192	0.605911	20.2928	0.355388	5.97568	0.596823	0.562741	0.190744	2.31	2.78	21.2342	36.6437		SCL3	24.5	11.8201	160.011	34.671	25.2713	6.38255	46.2098	6.31475	135.121	6.10769	16.8173	1.41853	5.41313	1.07554	0.281976	1.07392	0.179544	1.1066	0.233721	0.658332	0.103869	0.691252	0.107279	1.2804	0.460376	12.8653	2.77068	0.872502
	SCL4	44.5	0.919194	6.62272	0.565612	18.6627	0.309693	4.57357	0.562543	0.498032	0.15368	2.14	2.68	23.0931	40.1384		SCL4	44.5	10.9899	146.029	35.6138	22.0539	5.77809	37.5604	5.29607	135.235	5.53194	16.4878	1.2685	4.90333	1.01123	0.269071	0.988367	0.162865	1.00137	0.209706	0.605582	0.0983463	0.621989	0.0934979	1.07466	0.385981	6.72444	2.54765	0.805486
	SCL5	61.5	0.891474	4.18507	0.580625	16.3722	0.320027	3.60407	0.447291	0.46684	0.112265	2.13	2.65	21.6157	47.516		SCL5	61.5	10.427	140.993	33.4885	23.256	6.06463	36.6206	4.95196	135.878	5.19286	18.6174	1.23088	4.75126	0.995563	0.274142	1.02318	0.169085	1.10305	0.222858	0.658631	0.10123	0.688259	0.108647	1.08901	0.365443	5.71599	2.74661	0.782165
	SCL6	76	0.871386	6.37654	0.476759	17.3266	0.334284	3.48704	0.378601	0.499534	0.0861259	2.21	2.47	20.188	46.1665		SCL6	76	9.8607	151.375	18.9025	18.8026	4.3854	43.1507	5.6678	80.2272	3.47662	23.737	0.842978	3.27672	0.682079	0.187615	0.763409	0.127518	0.827995	0.179238	0.53602	0.0854738	0.563001	0.085813	1.29828	0.401964	5.72756	1.9396	0.839014
Swift Creek Middle	SCM1	3	0.65518	0.440765	0.417514	16.7726	0.194891	6.95611	0.11987	0.181996	0.12984	1.86029	5.47	18.5356	48.9205		SCM1	3	7.20336	123.178	22.5652	10.0726	22.4851	22.0313	3.03461	67.437	12.1032	7.90465	2.91722	12.2368	2.77902	0.78544	3.19779	0.496666	3.08958	0.666616	1.95207	0.27376	1.78382	0.294147	0.619355	0.235229	22.2174	2.0105	0.535828
	SCM2	9.5	0.654706	0.719016	0.57928	19.3939	0.213725	10.9332	0.143071	0.265031	0.131803	2.26329	5.86	17.6547	41.843		SCM2	9.5	15.2799	146.753	23.9904	13.6327	29.9099	28.1903	3.67711	80.2579	13.9922	10.6785	3.35822	14.2241	3.32204	0.947328	3.91702	0.636884	4.05798	0.904842	2.60197	0.390239	2.49288	0.398541	0.783296	0.26745	4.69316	2.96041	0.736189
	SCM3	18	1.16839	0.266004	0.481751	23.1886	0.210069	7.84729	0.15267	0.279771	0.116802	2.26475	6.05	18.3182	40.8241		SCM3	18	11.5854	162.885	23.3741	11.8606	24.4024	28.4769	3.7081	75.1286	10.6599	8.87274	2.68091	11.3859	2.70755	0.780972	3.24685	0.548742	3.47024	0.775393	2.26195	0.35458	2.24958	0.353297	0.78879	0.289127	5.12382	2.83269	0.794317
	SCM4	43	1.09588	2.27216	0.40461	20.4643	0.239036	4.07605	0.149584	0.347017	0.10261	1.70885	6.03	20.07	44.1358		SCM4	43	16.1326	148.073	24.8828	11.7757	18.0026	34.4214	3.65826	84.3129	8.18394	9.92769	2.1356	8.91155	2.1653	0.612121	2.50403	0.422142	2.79646	0.605589	1.80264	0.278323	1.85383	0.293433	1.0409	0.27301	4.83256	3.06555	0.886788
	SCM5	75.5	1.38575	1.1623	0.388205	22.3351	0.228835	4.96492	0.131864	0.297118	0.129658	1.85172	5.84	16.4484	46.2219		SCM5	75.5	14.8572	157.137	22.8259	10.1187	16.9262	29.063	3.40251	80.7773	7.54039	10.3687	2.06386	8.77122	2.14517	0.601819	2.43141	0.418491	2.79114	0.603463	1.78384	0.278506	1.85873	0.295242	0.847122	0.251848	4.83773	3.52951	0.857157
	SCM6	98	0.762346	3.80829	0.432882	21.2293	0.248183	6.35431	0.133873	0.331076	0.100817	1.96003	5.54	16.54	43.3212		SCM6	98	22.5602	152.782	22.1014	11.0636	17.8484	28.556	3.35215	92.7643	7.47767	11.4906	2.01943	8.56105	2.13006	0.608986	2.44339	0.42949	2.84853	0.620182	1.85114	0.286689	1.90427	0.302984	0.865563	0.243512	4.48268	3.7573	0.861759
String Bean Creek	SBC1	5	nm	4.06816	0.467619	15.5096	0.148309	26.6447	0.240436	0.314739	0.279037	1.62334	3.93733	23.9852	22.7815		SBC1	5	21.8499	58.5182	14.3112	18.3403	7.22348	33.3347	1.74876	55.3788	2.90516	6.84184	0.818998	3.45285	0.896758	0.21682	1.00421	0.178629	1.124	0.248419	0.744545	0.133643	0.809976	0.120949	0.930675	0.136827	19.4418	1.16856	0.316722
	SBC2	15	nm	5.11716	0.38926	15.1234	0.110758	21.5198	0.193708	0.408569	0.199323	1.48093	3.62883	18.9433	32.885		SBC2	15	23.0829	69.6971	9.51732	17.1925	10.4759	35.3549	1.65455	43.8142	2.92591	6.31997	0.937179	4.22935	1.18252	0.295526	1.39449	0.25931	1.66287	0.360321	1.04021	0.182143	1.03977	0.160133	1.07118	0.141704	3.12778	1.21665	0.310055
	SBC3	25	nm	5.34825	0.401053	14.1748	0.0883488	18.5678	0.153242	0.481942	0.16862	1.36067	3.43229	18.1727	37.6502		SBC3	25	22.4793	75.8272	7.50915	18.8971	11.6114	33.1593	1.51469	30.6267	2.76287	5.78655	0.948758	4.5121	1.34396	0.337965	1.55189	0.297599	1.92263	0.405183	1.17504	0.205032	1.15464	0.16834	0.992518	0.117729	3.4957	0.895843	0.227581
	SBC4	35	nm	6.55339	0.508707	15.9093	0.0890367	18.3993	0.16504	0.676574	0.202757	1.49507	3.30042	20.4319	32.2684		SBC4	35	25.1015	102.205	6.99392	22.054	14.9505	49.0422	1.72424	31.7957	3.01104	6.55234	1.09899	5.01575	1.50682	0.407389	1.83339	0.345618	2.24363	0.508341	1.44172	0.250725	1.55576	0.218856	1.40468	0.124425	2.55618	0.781785	0.242377
	SBC5	45	nm	9.07184	0.410979	16.758	0.0695883	15.2152	0.156734	0.848751	0.196925	1.29718	3.18584	15.074	37.715		SBC5	45	32.4662	121.566	5.32822	18.5984	20.5127	49.8563	1.78727	25.7301	4.18655	7.25735	1.3902	6.76098	2.04763	0.53303	2.56805	0.491288	3.10333	0.716176	1.96037	0.3277	1.94157	0.270817	1.55407	0.128442	1.64672	0.77035	0.169101
	SBC6	55	nm	9.03681	0.40433	16.6807	0.068309	14.7549	0.153499	0.852052	0.21901	1.26612	3.30036	16.1261	37.1378		SBC6	55	31.0586	124.834	5.07551	18.3091	24.1711	50.302	1.81816	25.7997	3.86288	7.56203	1.53029	7.58533	2.37553	0.63942	3.03959	0.561306	3.48153	0.805908	2.21176	0.358354	2.14616	0.296845	1.59303	0.127081	1.46946	0.748073	0.181865
	SBC7	65	nm	7.40735	0.340552	14.3943	0.0611289	12.4406	0.134488	0.717998	0.185761	1.11961	2.93429	14.6737	45.5902		SBC7	65	25.781	106.741	4.25869	15.1704	19.8297	35.5805	1.55048	21.5734	3.223	6.23802	1.25264	6.29483	1.9873	0.511571	2.45562	0.451227	2.84867	0.632737	1.74072	0.282909	1.64073	0.229053	1.13272	0.11084	1.1771	0.57812	0.194619
	SBC8	75	nm	8.37235	0.359737	16.4229	0.0706906	13.0862	0.153772	0.811883	0.205336	1.2799	3.13109	16.0024	40.1038		SBC8	75	30.9525	116.905	4.94906	16.2163	20.957	56.0709	1.72437	26.3664	3.46257	6.69061	1.35667	6.66465	2.09692	0.541601	2.63022	0.474285	3.06046	0.682904	1.98407	0.335306	2.02902	0.294252	1.68978	0.119987	1.26335	0.723412	0.239913
	SBC9	85	nm	10.6543	0.365557	16.6265	0.073903	12.0827	0.159323	0.904606	0.229221	1.04068	2.72652	17.3062	37.8307		SBC9	85	36.6671	131.797	4.59572	17.3056	23.9122	55.1887	1.7856	27.8616	3.36406	7.96189	1.42788	7.18954	2.33729	0.608654	2.97515	0.533696	3.44073	0.790013	2.22844	0.368518	2.22265	0.320428	1.75412	0.117493	1.34237	0.748254	0.179575
	SBC10	95	nm	10.9259	0.524564	17.2804	0.0825025	12.1436	0.165864	1.03296	0.250557	1.10164	2.81206	21.7199	31.96		SBC10	95	37.1571	139.377	5.17454	24.7961	25.0535	67.0228	2.03226	31.4366	3.58236	8.3358	1.51575	7.56329	2.42022	0.644594	3.10844	0.565801	3.63531	0.8403	2.32457	0.403069	2.36531	0.350086	2.03855	0.135928	1.34615	0.821327	0.268022
	SBC11	115	2.25434	3.30372	0.428143	17.7898	0.0864057	6.62113	0.136877	0.733849	0.187588	1.18	2.97	16.36	50.2025		SBC11	115	25.4743	145.2	4.56186	11.5969	19.9059	54.7208	1.71821	24.4536	2.84586	7.03689	1.18883	6.29079	2.05451	0.539353	2.65168	0.470712	3.19334	0.691213	2.03221	0.309025	1.9491	0.303532	1.57136	0.113701	1.05335	0.652242	0.17407
Pick. Gulch Summit	PGR1	3	nm	13.5839	0.788836	7.63221	2.39706	6.81904	0.283568	0.562416	0.205366	0.375623	0.940923	13.5986	52.8124		PGR1	3	15.6536	111.357	123.001	100.642	24.6179	129.187	16.1053	501.723	46.1668	60.8869	8.00166	28.9821	5.57799	1.01837	4.7512	0.711161	3.98114	0.79289	2.27981	0.372628	2.27982	0.333978	3.83902	1.24922	154.382	16.3663	3.14792
	PGR2	10	nm	8.80223	5.12172	7.79346	1.65433	17.6395	0.180262	0.388436	0.235869	0.575489	2.48739	18.9438	36.1775		PGR2	10	12.2089	72.0414	86.9084	128.96	13.3316	77.3723	9.79936	377.828	18.7858	34.7659	4.46785	15.6852	2.97996	0.56982	2.49518	0.370036	2.12608	0.422451	1.19882	0.20688	1.26729	0.188219	2.2628	0.75288	22.2407	8.66805	1.98781
Pick. Gulch Footslope 1	PGF1-1	2	nm	12.8373	1.92433	7.63819	2.53445	5.71476	0.346797	0.563814	0.166196	0.35534	0.897061	10.419	56.6028		PGF1-1	2	14.108	110.775	87.643	122.199	23.8192	125.114	16.368	507.155	27.227	56.1915	7.01589	25.7187	5.22612	0.944408	4.62017	0.693926	3.85683	0.803147	2.24912	0.380271	2.34057	0.342312	3.83552	1.32563	118.978	14.0497	3.00374
	PGF1-2	6	nm	19.0046	1.17468	8.61045	3.20555	8.49634	0.198567	0.702397	0.132878	0.359961	1.04109	6.66	50.4135		PGF1-2	6	19.4243	114.266	126.076	150.728	29.1713	149.121	19.7664	588.456	37.929	62.0494	9.25921	33.4843	6.54416	1.1605	5.53052	0.822893	4.69102	0.96419	2.70519	0.455016	2.74048	0.415669	4.56091	1.5578	48.6821	19.5435	3.09404
Pick. Gulch Footslope 2	PGF2-1	2	nm	13.7671	2.17356	8.03161	2.50492	9.14192	0.230186	0.547497	0.289654	0.418915	1.35306	14.4786	47.063		PGF2-1	2	15.9934	100.979	127.61	126.533	20.1498	122.017	15.9986	550.494	30.7163	59.795	7.31516	25.8564	4.97464	0.906504	4.12336	0.626634	3.45031	0.697151	1.93508	0.325947	2.03959	0.301281	3.84668	1.32179	53.0213	15.4788	2.74253
	PGF2-2	7	nm	18.6354	1.05966	10.1138	2.62585	9.88955	0.353204	0.606391	0.464801	0.546742	0.95332	17.46	37.2913		PGF2-2	7	22.7052	159.063	154.163	137.186	31.0832	149.632	15.7714	781.776	40.2592	77.6961	9.56716	34.3692	6.73878	1.33018	5.75107	0.864118	4.98166	1.00665	2.73969	0.47214	2.79479	0.420005	4.33248	1.20827	457.017	19.0201	4.00293
Uncertainty			0.0634	0.0536063	0.0758319	0.0692859	0.0745926	0.0869357	0.109832	0.0841206	0.111895	0.101323	0.101114	~2%*					0.0715	0.0694	0.04	0.0553	0.0625	0.0677	0.1683	0.0376	0.0425	0.0561	0.0499	0.0561	0.0541	0.0572	0.0706	0.056	0.0622	0.0513	0.0684	0.0947	0.061	0.0537	0.0702	0.0869	0.0467	0.0447	0.0746
			Comments
			Na2O values are not utilized as NaCl was added to encourage flocculation of clay-size particles during extraction from bulk soil and halite was observed within some clay size fraction samples during XRD analysis after extraction
			SiO2 values are calculated by summing major element concentrations and loss on ignition at 950 and subtracting from 100%
			Loss on Ignition values have a roughly 2% error (Heiri et al. 2001)
			Heiri, O., Lotter, A. F., & Lemcke, G. (2001). Loss on ignition as a method for estimating organic and carbonate content in sediments: reproducibility and comparability of results. Journal of paleolimnology, 25(1), 101-110.
			nm = not measured

## Sheet: Parent Mat. Bulk Diss (ICPMS)
Sample	Na2O (wt%)	Al2O3 (wt%)	CaO (wt%)	Fe2O3 T (wt%)	K2O (wt%)	MgO (wt%)	P2O5 (wt%)	TiO2 (wt%)	MnO (wt%)	Cr2O3 (wt%)	NiO (wt%)	LOI950 (wt.%)	SiO2 (wt.%)	Sc (ppm)	V (ppm)	Rb (ppm)	Sr (ppm)	Y (ppm)	Zr (ppm)	Nb (ppm)	Ba (ppm)	La (ppm)	Ce (ppm)	Pr (ppm)	Nd (ppm)	Sm (ppm)	Eu (ppm)	Gd (ppm)	Tb (ppm)	Dy (ppm)	Ho (ppm)	Er (ppm)	Tm (ppm)	Yb (ppm)	Lu (ppm)	Hf (ppm)	Ta (ppm)	Pb (ppm)	Th (ppm)	U (ppm)
WHGC PM 1	nm	0.54343	0.17238	9.18867	0.00383822	39.1942	0.00229156	0.00238773	0.121638	3.04469	1.80979	12.7949	33.1218	10.9284	40.0393	0.144084	1.45693	0.0802399	0.0871088	0.00507198	1.41543	0.0416178	0.0637857	0.00603119	0.026022	0.0054144	0.00108459	0.00675101	0.00159868	0.00765729	0.00400003	0.0109197	0.00275565	0.0226863	0.00415577	0.00259848	0.00765028	1.7341	0.00760986	0.0124471
WHGC PM 2	0.0199458	0.655478	0.265171	10.6089	0.00355392	39.2822	0.00320684	0.00477262	0.135957	nm	nm	12.7949	nm	nm	nm	nm	nm	nm	nm	nm	nm	nm	nm	nm	nm	nm	nm	nm	nm	nm	nm	nm	nm	nm	nm	nm	nm	nm	nm	nm
PG PM 1	nm	2.09643	0.0812904	6.94901	0.00598783	37.7316	0.00894166	0.00831796	0.0602502	2.41691	1.32506	12.93	36.3862	9.25095	33.0905	0.255341	3.18611	1.37446	6.65376	0.742365	5.19205	0.45392	1.03627	0.138337	0.537389	0.138692	0.00847619	0.137365	0.0264461	0.176742	0.0385432	0.135427	0.024	0.158298	0.0238991	0.187736	0.104119	1.88784	2.40799	1.59736
PG PM 2	0.00390456	2.52639	0.143628	8.02236	0.00760661	38.5592	0.0164127	0.0124354	0.0673434	nm	nm	12.93	nm	nm	nm	nm	nm	nm	nm	nm	nm	nm	nm	nm	nm	nm	nm	nm	nm	nm	nm	nm	nm	nm	nm	nm	nm	nm	nm	nm
EB PM 1	nm	2.50388	2.00589	8.05968	0.00469772	33.7322	0.00270925	0.0915079	0.119633	2.17803	1.41719	7.34927	42.5353	9.06946	61.9583	0.287714	1.56884	2.26573	1.36172	0.00762475	2.70839	0.021569	0.0914765	0.0261534	0.224292	0.130128	0.0584476	0.237913	0.04688	0.341511	0.0797101	0.24263	0.0393513	0.268323	0.0380857	0.0784505	0.00947397	0.0686097	0.00394773	0.00617639
EB PM 2	0.0568919	2.8538	2.54725	8.57009	0.00404599	31.2161	0.00130277	0.120166	0.121053	nm	nm	7.34927	nm	nm	nm	nm	nm	nm	nm	nm	nm	nm	nm	nm	nm	nm	nm	nm	nm	nm	nm	nm	nm	nm	nm	nm	nm	nm	nm	nm
EB PM 3	0.0553453	2.79415	2.67635	8.73959	0.00445577	31.8106	0.0014456	0.117771	0.124205	nm	nm	7.34927	nm	nm	nm	nm	nm	nm	nm	nm	nm	nm	nm	nm	nm	nm	nm	nm	nm	nm	nm	nm	nm	nm	nm	nm	nm	nm	nm	nm
DFL PM 1	nm	10.229	5.17452	11.4133	0.205621	7.36579	0.0663944	0.873346	0.172563	0.309794	0.190944	2.52025	61.4785	31.2057	308.003	5.73761	80.3344	24.4463	33.8382	0.893336	67.2572	2.9174	7.65024	1.27781	6.48731	2.25545	0.774876	3.14548	0.595319	3.95744	0.874205	2.48228	0.434411	2.53925	0.365445	1.1765	0.0648487	1.4264	0.841526	0.24628
DFL PM 2	4.30133	11.6346	6.4306	12.2535	0.178007	6.84209	0.0674177	1.12304	0.172638	nm	nm	2.52025	nm	nm	nm	nm	nm	nm	nm	nm	nm	nm	nm	nm	nm	nm	nm	nm	nm	nm	nm	nm	nm	nm	nm	nm	nm	nm	nm	nm
DFL PM 3	4.07588	11.1549	6.6813	12.0117	0.251905	6.77385	0.0442363	1.07344	0.171571	nm	nm	2.52025	nm	nm	nm	nm	nm	nm	nm	nm	nm	nm	nm	nm	nm	nm	nm	nm	nm	nm	nm	nm	nm	nm	nm	nm	nm	nm	nm	nm
SBC PM 1	nm	0.486602	0.169174	7.27428	0.00683956	33.0019	0.00669086	0.00424506	0.137798	3.49474	2.00072	13.7959	39.6212	6.1649	33.47	0.349658	0.801835	0.907996	0.185249	0.0324825	3.76246	0.132461	0.184638	0.0481672	0.235905	0.0768827	0.0181226	0.103772	0.0170772	0.0981061	0.0221037	0.0606327	0.0102064	0.0579338	0.00853953	0.00897172	0.00481066	0.195625	0.0147023	0.01
SBC PM 2	0.0208939	0.564271	0.242062	7.89498	0.00675452	31.976	0.00630482	0.00655449	0.145195	nm	nm	13.7959	nm	nm	nm	nm	nm	nm	nm	nm	nm	nm	nm	nm	nm	nm	nm	nm	nm	nm	nm	nm	nm	nm	nm	nm	nm	nm	nm	nm
SBC PM 3	0.0195962	0.542659	0.235725	7.78503	0.00808376	31.6393	0.00207009	0.00645156	0.143651	nm	nm	13.7959	nm	nm	nm	nm	nm	nm	nm	nm	nm	nm	nm	nm	nm	nm	nm	nm	nm	nm	nm	nm	nm	nm	nm	nm	nm	nm	nm	nm
SCL PM 1	0.0127567	0.37744	1.41259	7.50757	0.0149725	26.3789	0.00107723	0.00809496	0.130293	4.45	2.44	6.04879	51.2175	5.22893	29.2408	0.225824	1.23264	0.211215	1.16457	0.0273882	0.91125	0.0461147	0.100914	0.013532	0.0588888	0.0185512	0.00556121	0.0218787	0.00410949	0.0329088	0.00760297	0.0258519	0.00454886	0.0360335	0.00598216	0.0284711	0.00976404	0.162942	0.00623723	0.00714949
SCL PM 2	0.0139644	0.349635	1.37128	7.49588	0.00532027	28.2196	0.00385975	0.00841592	0.129393	nm	nm	6.04879	nm	nm	nm	nm	nm	nm	nm	nm	nm	nm	nm	nm	nm	nm	nm	nm	nm	nm	nm	nm	nm	nm	nm	nm	nm	nm	nm	nm
SCM PM 1	0.00744401	0.0479914	1.11949	6.67413	0.0116115	21.7146	0.00135286	0.00176266	0.0984197	4.08	2.16	5.28894	58.7943	1.11437	27.3107	0.0660635	0.350451	0.0362467	0.0433315	0.00971797	0.360929	0.0120639	0.0256311	0.00313725	0.0210729	0.00262415	0.000916848	0.00377181	0.000802569	0.0052649	0.000913845	0.00549596	0.00160218	0.012706	0.00295044	0.000738974	0.00500863	0.0868165	0.000321547	0.00148943
SCM PM 2	0.00825801	0.0444411	1.07309	6.8682	0.000821172	23.3137	0.00141196	0.00173096	0.10016	nm	nm	5.28894	nm	nm	nm	nm	nm	nm	nm	nm	nm	nm	nm	nm	nm	nm	nm	nm	nm	nm	nm	nm	nm	nm	nm	nm	nm	nm	nm	nm
Uncertainty	0.0634	0.0536063	0.0758319	0.0692859	0.0745926	0.0869357	0.109832	0.0841206	0.111895	0.101323	0.101114	~2%*		0.0715	0.0694	0.04	0.0553	0.0625	0.0677	0.1683	0.0376	0.0425	0.0561	0.0499	0.0561	0.0541	0.0572	0.0706	0.056	0.0622	0.0513	0.0684	0.0947	0.061	0.0537	0.0702	0.0869	0.0467	0.0447	0.0746
	nm = not measured
Major Element Averages
Soil Site	Na2O (wt%)	Al2O3 (wt%)	CaO (wt%)	Fe2O3 T (wt%)	K2O (wt%)	MgO (wt%)	P2O5 (wt%)	TiO2 (wt%)	MnO (wt%)	Cr2O3 (wt%)	NiO (wt%)	LOI950 (wt.%)	SiO2 (wt%)
WHGC	0.0199458	0.599454	0.218776	9.89879	0.00369607	39.2382	0.0027492	0.00358017	0.128797	3.04469	1.80979	12.7949	32.2367
PG	0.00390456	2.31141	0.112459	7.48569	0.00679722	38.1454	0.0126772	0.0103767	0.0637968	2.41691	1.32506	12.93	35.1755
EB	0.0561186	2.71727	2.40983	8.45645	0.00439982	32.253	0.00181921	0.109815	0.12163	2.17803	1.41719	7.34927	42.9252
DfL	4.18861	11.0061	6.09547	11.8929	0.211844	6.99391	0.0593495	1.02328	0.172258	0.309794	0.190944	2.52025	55.3353
SBC	0.0202451	0.531178	0.215654	7.65143	0.00722595	32.2057	0.00502192	0.00575037	0.142214	3.49474	2.00072	13.7959	39.9242
SCL	0.0133606	0.363537	1.39194	7.50173	0.0101464	27.2992	0.00246849	0.00825544	0.129843	4.45	2.44	6.04879	50.3407
SCM	0.00785101	0.0462163	1.09629	6.77116	0.00621636	22.5142	0.00138241	0.00174681	0.0992901	4.08	2.16	5.28894	57.9267
	Comments
	Na2O values are not utilized as NaCl was added to encourage flocculation of clay-size particles during extraction from bulk soil and halite was observed within some clay size fraction samples during XRD analysis after extraction
	SiO2 values are calculated by summing major element concentrations and loss on ignition at 950 and subtracting from 100%
	Loss on Ignition values have a roughly 2% error (Heiri et al. 2001)
	Heiri, O., Lotter, A. F., & Lemcke, G. (2001). Loss on ignition as a method for estimating organic and carbonate content in sediments: reproducibility and comparability of results. Journal of paleolimnology, 25(1), 101-110.
	nm = not measured
