# Supplementary material for: Fe-rich X-ray amorphous material records past climate and persistence of water on Mars
Source: Commun Earth Environ. 2024 Jul 7;5(1):364. doi: 10.1038/s43247-024-01495-4 (PMC11227439; doi:10.1038/s43247-024-01495-4)
Supplement: Supplementary file 6 — Data Set 3 [file 43247_2024_1495_MOESM6_ESM.xlsx]

## Sheet: Soil Descriptions
KLAMATH MOUNTAINS
Depth (cm)	Horizon	Wet Color	Dry Color	Structure	Clay Films	Gravel %	Wet Cons.	Dry Cons.	Texture	pH	Loss on Ignition at 550 C (wt.%)
Eunice Bluff
0-3	A	10YR 4/2	10YR 4/3	sg	-	30.9	ss po	lo	SL	6.64	11.5546		Soil description terminology can be found in the 2012 USDA Field Book for Describing and Sampling Soils
3-13	BC	10YR 4/4	10YR 4/4	1vfsbk	-	52.7	ss ps	so	SCL	6.57	4.97925		Reference: Schoeneberger, P. J., Wysocki, D. A., & Benham, E. C. (Eds.). (2012). Field book for describing and sampling soils. Government Printing Office.
13-23		10YR 4/4	10YR 5/4	1vfsbk	-	42.9	so ps	so	SCL	6.18	4.4898		*We use the horizon subscript (v) to denote vesicular A horizons.
23-33		7.5YR 4/4	7.5YR 5/4	1vfsbk	-	49.3	ss ps	so	SCL	6.35	3.9916
33-43	C	7.5YR 5/4	7.5YR 5/3	m	-	47.8	ss p	lo	SCL	6.27	3.45572
43-63		7.5YR 5/4	7.5YR 5/3	m	-	60.7	ss p	lo	SCL	6.62	1.67064
Deadfall Lake
0-7	A	10YR 3/2	10YR 4/3	sg	-	84.9	ss po	lo	SL	6.23	8.93471
7-17	C	10YR 3/2	10YR 4/3	m	-	71.1	so sp	lo	SL	6.52	5.32787
17-27		10YR 3/3	10YR 4/4	m	-	63.2	so po	lo	SL	6.52	4.56432
27-37		10YR 4/4	10YR 5/4	m	-	70.7	ss po	lo	SL	6.54	4.662
37-47		10YR 4/3	10YR 4/3	m	-	53.9	so po	lo	SL	6.58	7.52033
47-53		10YR 5/3	10YR 5/3	m	-	60.5	so po	lo	SL	6.69	4.69388
Swift Creek Late Wisconsinan
0-5	A	10YR 2/2	10YR 3/2	2msbk	-	39.1	ss po	so	SL	5.88	21.968
5-16	AB	10YR 2/2	10YR 3/2	m, 1fsbk	-	49.2	ss ps	lo	SL	6.08	10.6178
16-33	Bw1	7.5YR 3/4	7.5YR 5/4	2msbk	1fcobr	61.9	ss ps	so	SL	6.45	5.15464
33-56	Bw2	7.5YR 3/4	7.5YR 4/4	1fsbk	v1fcobr	52.5	ss po	so	SL	6.7
56-67	BC	7.5YR 4/4	7.5YR 4/4	1fsbk	-	46.6	ss ps	so	SL	6.69	4.48718
67-85	C	10YR 4/4	10YR 5/4	1fsbk	-	46	ss ps	so	SL	6.79	3.90456
Swift Creek Middle Wisconsinan
0-6	A	10YR 3/2	10YR 4/2	m, 2msbk	-	52	ss p	so	SL	7.08	13.8158
6-13	Bw	10YR 4/3	10YR 4/4	2 f sbk	v1fcobr	56.2	ss po	sh	SL	7.01	4.51613
13-23	Bw2	7.5YR 4/3	7.5YR 4/3	2msbk	1dcobr	59.5	ss ps	sh	SL	7.08	4.13043
23-63		5YR 4/4	5YR 4/4	2msbk	1dcobr	68.6	s p	sh	SCL	7.07	2.77186
63-88	BC	10YR 4/4	10YR 4/6	2msbk, 2csbk	1fcobr	51.4	s p	sh	SCL	7.09	2.64317
88-108	C	10YR 5/4	10YR 5/4	m, 1msbk	-	32.5	ss po	so	LS	7.02	1.70213
String Bean Creek
0-10	A	10YR 3/2	10YR 4/3	sg	-	66.2	so po	lo	SL	7.04	8.9172
10-20	BA	7.5YR 3/2	7.5YR 4/3	2msbk	1fcobr	56.2	ss ps	so	SCL	7.19	9.07127
20-30	Bt	7.5YR 3/3	7.5YR 4/4	2fsbk	2dcobr	54.1	ss po	so	SCL	7.44	5.5336
30-40		5YR 4/3	7.5YR 4/4	2msbk	2dcobr	53.9	ss ps	so	SCL	7.33	5
40-50		5YR 4/3	5YR 4/4	2msbk	2dcobr	55.5	ss ps	sh	SCL	6.98	4.08163
50-60		5YR 4/3	5YR 4/4	2msbk	2dcobr	58	ss p	so	SCL	7.33	2.94785
60-70		5YR 4/4	7.5YR 4/4	2msbk	2dcobr	55.8	s p	so	SCL	7.42	3.48584
70-80	BC	7.5YR 4/4	7.5YR 3/4	2msbk	2dcobr	56.5	s po	so	SL	7.56	3.30579
80-90		7.5YR 4/3	7.5YR 4/4	2csbk	2dcobr	59.6	ss po	sh	LS	7.56	3.3264
90-100		7.5YR 4/3	7.5YR 5/3	1msbk	2dcobr	76.6	ss po	so	LS	7.55	2.68041
100-130	C			m, 1msbk	-, 1dcobr			so			2.27273
TABLELANDS
Depth (cm)	Horizon	Wet Color	Dry Colo	Structure	Clay Films	Gravel %	Wet Cons.	Dry Cons.	Texture	pH	Loss on Ignition at 550 C (wt.%)
Devil's Punchbowl
0-10	C	2.5Y 3/2	2.5Y 4/3	m	-	72.6103	ss po	lo	SL	7.3	7.46528
10-20		2.5Y 4/3	2.5Y 5/4	m	-	nm	s p	lo	SCL	7.35	6.23656
20-35		2.5Y 4/3	2.5Y 5/3	m	-	69.3756	s p	lo	SCL	7.54	7.84314
35-50		2.5Y 4/3	2.5Y 4/3	m	-	nm	s p	lo	SCL	7.57	7.28051
Winterhouse Gulch Canyon
0-4	C	2.5Y 3/3	2.5Y 4/3	m	-	55.1842	ss ps	lo	SL	7.73	8.43373
4-16		2.5Y 3/3	2.5Y 4/3	m	-	35.9247	ss po	lo	SL	7.87	8.25147
16-60		2.5Y 3/3	2.5Y 5/3	m	-	43.8675	ss ps	lo	SL	7.67	8.61057
60-70		2.5Y 3/3	2.5Y 5/3	m	-	49.5969	ss ps	lo	SL	7.87	8.21168
Winterhouse Gulch Mouth
0-11	C	2.5Y 3/2	2.5Y 4/2	m	-		ss po	lo	LS	7.33	11.0647
11-20		2.5Y 3/3	2.5Y 4/3	m	-	69.6645	ss po	lo	SL	7.59	9.28854
20-35		10YR 4/3	10YR 5/4	m	-	80.8708	ss p	lo	SCL	7.86	6.99774
35-50		10YR 4/3	10YR 5/4	m	-	82.0185	s p	lo	SCL	7.96	7.52896
Trout River Gulch
0-10	C	10YR 4/3	10YR 5/4	m	-	39.7147	ss ps	lo	SL	7.47	8.70445
10-30		10YR 4/4	10YR 5/4	m	-	65.7527	s ps	lo	SL	7.46	8.85122
30-50		10YR 4/4	10YR 5/4	m	-	53.8128	ss po	lo	SL	7.53	7.59494
50-70		10YR 4/4	10YR 5/4	m	-	55.5834		lo		8.3	8.30116
PICKHANDLE GULCH
Depth (cm)	Horizon	Wet Color	Dry Colo	Structure	Clay Films	Gravel %	Wet Cons.	Dry Cons.	Texture	pH	Loss on Ignition at 550 C (wt.%)
Summit (Ridge)
0-6	Av	10YR 4/3	10YR 4/3	1fsbk	-	66.8	ss p	lo	SC	8.17	2.15517
6-14	Cr	10YR 4/2	10YR 5/3	m	-	77.6	so po	lo	LS	8.46	1.02669
Footslope 1
0-4	Av	10RY 4/3	10YR 6/3	1fsbk	-	52.9	ss p	so	SCL	8.66	2.04082
4-8	C	10YR 4/3	10YR 6/3	1fsbk	-	53.7	s p	so	SCL	8.65	2.31579
Footslope 2
0-4	Av	10YR 4/2	10YR 5/3	m	-	66.5	ss p	lo	SCL	8.72	1.83299
4-10	C	10YR 4/2	10YR 5/3	m	-	70.6	ss po	lo	SL	8.51	1.86335

## Sheet: Analysis Tracker
	Location	Sampling Site	Soil Horizon	Depth (cm)	Sample ID	XRD					ICP-MS	Selective Dissolutions			Loss on Ignition		pH
						Random		Oriented
						Bulk Soil	Clay-Size (spiked) + Rietveld Refinement	Mg-Sat Air Dried	Mg-Sat Glycolated	K-Sat Heated (550)	Clay-Size	Sodium Pyrophosphate (FeP)	Hydroxylamine Hydrochloride (FeH)	Citrate Dithionite (FeD)	Bulk Soil (550℃)	Clay-Size (950℃)
	Klamath Mountains	Eunice Bluff	A	0-3	EB1	X	X	X	X	X	X	X	X	X	X	X	X		Any time the parent material is marked by an X denoting application of a technique, this was done to powdered parent material regardless of the designation in the title boxes.
			BC	3-13	EB2						X	X	X	X	X	X	X
				13-23	EB3	X	X				X	X	X	X	X	X	X
				23-33	EB4			X	X	X	X	X	X	X	X	X	X
			C	33-43	EB5						X	X	X	X	X	X	X
				43-53	EB6	X	X	X	X	X	X	X	X	X	X	X	X
			PM		EB PM	X					X		X	X		X			Abbreviations
		Deadfall Lake	A	0-7	DfL1	X	X				X	X	X	X	X	X	X		XRD	X-ray Diffraction
			C	7-17	DfL2						X	X	X	X	X	X	X		ICP-MS	Inductively Coupled Plasma Mass Spectrometry
				17-27	DfL3		X				X	X	X	X	X	X	X		Mg-sat	Mg-saturated
				27-37	DfL4	X		X	X	X	X	X	X	X	X	X	X		K-sat	K-saturated
				37-47	DfL5						X	X	X	X	X	X	X		PM	Parent Material
				47-53	DfL6	X	X	X	X	X	X	X	X	X	X	X	X
			PM		DfL PM	X					X		X	X		X
		Swift Creek Late Wisconsinan	A	0-5	SCL1	X	X	X	X		X	X	X	X	X	X	X
			AB	5-16	SCL2						X	X	X	X	X	X	X
			Bw1	16-33	SCL3			X	X	X	X	X	X	X	X	X	X		Terms
			Bw2	33-56	SCL4	X	X	X	X	X	X	X	X	X	X	X	X		Bulk Soil: material <2mm in diameter
			BC	56-67	SCL5						X	X	X	X	X	X	X		Clay-size fraction: material <2µm in diameter
			C	67-85	SCL6	X	X				X	X	X	X	X	X	X		(spiked): clay-size fraction material was spiked with 20 wt.% corundum for use in Rietveld refinement
			PM		SCL PM	X					X		X	X		X			Mg-Sat: Saturated with Mg2+ cations
		Swift Creek Middle Wisconsinan	A	0-6	SCM1	X	X	X	X		X	X	X	X	X	X	X		K-Sat: Saturated with K+ cations
			Bw1	6-13	SCM2						X	X	X	X	X	X	X		Air-Dried: dehydrated over time in open air
			Bw2	13-23	SCM3			X	X	X	X	X	X	X	X	X	X		Glycolated: solvated with ethylene glycol vapor in a closed chamber at 60-70 degrees celcius
				23-63	SCM4	X	X	X	X	X	X	X	X	X	X	X	X		Heated (550): heated to 550 degrees celcius to dehydrate
			BC	63-88	SCM5						X	X	X	X	X	X	X
			C	88-108	SCM6	X	X	X	X		X	X	X	X	X	X	X
			PM		SCM PM	X					X		X	X		X
		String Bean Creek	A	0-10	SBC1	X	X	X	X		X	X	X	X	X	X	X
			BA	10-20	SBC2		X	X	X		X	X	X	X	X	X	X
			Bt	20-30	SBC3						X	X	X	X	X	X	X
				30-40	SBC4						X	X	X	X	X	X	X
				40-50	SBC5	X	X	X	X	X	X	X	X	X	X	X	X
				50-60	SBC6						X	X	X	X	X	X	X
				60-70	SBC7			X	X		X	X	X	X	X	X	X
			BC	70-80	SBC8		X	X	X		X	X	X	X	X	X	X
				80-90	SBC9						X	X	X	X	X	X	X
				90-100	SBC10	X		X	X	X	X	X	X	X	X	X	X
			C	100-130	SBC11		X	X	X		X	X	X	X	X	X	X
			PM		SBC PM	X					X		X	X		X
	Location	Sampling Site	Soil Horizon	Depth (cm)	Sample ID	XRD					ICP-MS	Selective Dissolutions			Loss on Ignition		pH
						Random		Oriented
						Bulk Soil	Clay-Size (spiked) + Rietveld Refinement	Mg-Sat Air Dried	Mg-Sat Glycolated	K-Sat Heated (550)	Clay Size	Sodium Pyrophosphate	Hydroxylamine Hydrochloride	Citrate Dithionite	Bulk Soil (550℃)	Clay-Size (950℃)
	Tablelands	Devil's Punchbowl	C	0-10	DvP1	X					X	X	X	X	X	X	X
				10-20	DvP2						X	X	X	X	X	X	X
				20-35	DvP3		X				X	X	X	X	X	X	X
				35-50	DvP4	X		X	X	X	X	X	X	X	X	X	X
		Winterhouse Gulch Canyon	C	0-4	WHGC1	X		X	X	X	X	X	X	X	X	X	X
				4-16	WHGC2						X	X	X	X	X	X	X
				16-60	WHGC3		X				X	X	X	X	X	X	X
				60-70	WHGC4	X		X	X	X	X	X	X	X	X	X	X
		Winterhouse Gulch Mouth	C	0-11	WHGM1	X					X	X	X	X	X	X	X
				11-20	WHGM2						X	X	X	X	X	X	X
				20-35	WHGM3		X				X	X	X	X	X	X	X
				35-50	WHGM4	X		X	X	X	X	X	X	X	X	X	X
		Trout River Gulch	C	0-10	TRG1	X					X	X	X	X	X	X	X
				10-30	TRG2						X	X	X	X	X	X	X
				30-50	TRG3		X				X	X	X	X	X	X	X
				50-70	TRG4	X		X	X	X	X	X	X	X	X	X	X
		Parent Material			WHGC PM	X					X		X	X		X
	Location	Sampling Site	Soil Horizon	Depth (cm)	Sample ID	XRD					ICP-MS	Selective Dissolutions			Loss on Ignition		pH
						Random		Oriented
						Bulk Soil	Clay-Size (spiked) + Rietveld Refinement	Mg-Sat Air Dried	Mg-Sat Glycolated	K-Sat Heated (550)	Clay Size	Sodium Pyrophosphate	Hydroxylamine Hydrochloride	Citrate Dithionite	Bulk Soil (550℃)	Clay-Size (950℃)
	Pickhandle Gulch	Summit	Av	0-6	PGR1	X	X				X	X	X	X	X	X	X
			C	6-14	PGR2						X	X	X	X	X	X	X
		Footslope 1	Av	0-4	PGF1-1	X	X				X	X	X	X	X	X	X
			C	4-8	PGF1-2			X	X	X	X	X	X	X	X	X	X
		Footslope 2	Av	0-4	PGF2-1	X	X				X	X	X	X	X	X	X
			C	4-10	PGF2-2						X	X	X	X	X	X	X
		Parent Material			PG PM	X					X		X	X		X
